# Supplementary material
Source: Royal Society of Chemistry journal article supplement (doi:10.1039/d6ob00711b)
Supplement: d6ob00711b1.pdf [file d6ob00711b1.pdf]

Supplementary Information

## Visible-light-driven metal-free iminyl radical cyanation for the synthesis of 3-cyanoindoles

*Nikita Gupta,[a] Imtiaz Ahmed,[a] Plaban Jyoti Sarma,[b] Shilpa Neog,[c] Gaurishankar Phukan[c] and Vijay Kumar Das\*[a]*

*[a] Advanced Organic Synthesis & Photo-Catalysis Laboratory (AOSPCL), Dept. of Chemistry, Institute of Science, Banaras Hindu University, Varanasi, 221005, India*

*[b] Dept. of Chemistry, Gargaon College, Simaluguri, Sivasagar, Assam-785656, India*

*[c] Catalysis and Molecular Modelling Lab (CMML), Dept. of Chemical Sciences, Tezpur University, Assam-784028, India*

## Table of Contents

|                                                                               |     |
|-------------------------------------------------------------------------------|-----|
| 1. General Information.....                                                   | 3   |
| 1.1 Reagent Information.....                                                  | 3   |
| 1.2 Analytical Information.....                                               | 3   |
| 1.3 Computational details: .....                                              | 3   |
| 1.4 Photochemical Reaction Setup .....                                        | 3   |
| 2. General procedures.....                                                    | 5   |
| 2.1 General procedure for the preparation of starting material .....          | 5   |
| 2.2 General Procedure for cyanation of indole .....                           | 8   |
| 2.3 General Procedure for Carboxylation of 3-cyanoindole.....                 | 9   |
| 2.4 General Procedure for the Amidation of 3-cyanoindole.....                 | 9   |
| 3. One pot reaction for cyanation of indoles from indole 3- carbaldehyde..... | 9   |
| 4. Gram-scale reaction procedure for the cyanation of indole .....            | 10  |
| 5. Mechanistic Investigation .....                                            | 10  |
| 5.1 Radical Trapping Experiment .....                                         | 11  |
| 5.2 Luminescence Quenching Experiments .....                                  | 13  |
| 6. Potential energy diagram of pathway 2.....                                 | 17  |
| 7. Green Chemistry Metrics: Calculation of Eco-Scale .....                    | 18  |
| 8. Evaluation of Green metrics <sup>13</sup> .....                            | 21  |
| 9. Sensitivity test for the reaction <sup>14</sup> .....                      | 25  |
| 10. Cyano-indoles accessible by prior methods and our method.....             | 26  |
| 11. X-ray crystal structure of 3a .....                                       | 26  |
| 12. NMR Data of cyanide product.....                                          | 30  |
| 13. NMR Data of Aldehyde .....                                                | 40  |
| 14. NMR and HRMS Spectra of cyanide products.....                             | 43  |
| 15. NMR Spectra of starting material Oxime .....                              | 77  |
| 16. NMR Spectra of starting material: Aldehyde .....                          | 93  |
| 17. NMR Data and Spectra of 1-methyl-1H-indole-3-carboxylic acid (4i) .....   | 103 |
| 18. NMR Data and Spectra of 1-methyl-1H-indole-3-carboxamide (5i).....        | 105 |
| 19. DFT Calculation .....                                                     | 107 |

## 1. General Information

### 1.1 Reagent Information

Unless otherwise stated, all reactions were performed in oven-dried Schlenk tubes under air using screw-cap closures. All commercially available reagents and solvents were used as received without further purification (suppliers: Sigma-Aldrich, TCI, Alfa Aesar, BLD, Hyma, CDH). Crude products were purified by silica gel column chromatography (100–200 mesh). Organic solvents were removed under reduced pressure using an IKA rotary evaporator. Reaction progress was monitored by thin-layer chromatography (TLC) on silica gel F254 plates, visualized under UV light or iodine stain. Aldehyde formation was confirmed using the 2,4-dinitrophenylhydrazine (DNP) test.

### 1.2 Analytical Information

All isolated compounds were characterized by  $^1\text{H}$ ,  $^{13}\text{C}\{^1\text{H}\}$ , and high-resolution mass spectrometry (HRMS). NMR spectra were recorded on a JEOL ECZ 500R (500 MHz for  $^1\text{H}$ ; 126 MHz for  $^{13}\text{C}$ ). Chemical shifts ( $\delta$ ) are reported in parts per million (ppm) relative to residual solvent peaks:  $\text{CDCl}_3$  at 7.26 ( $^1\text{H}$ ) and 77.16 ppm ( $^{13}\text{C}$ ),  $\text{DMSO}-d_6$  at 2.50 and 39.52 ppm, respectively. Multiplicities are indicated as: s = singlet, d = doublet, t = triplet, q = quartet, m = multiplet, b = broad. Coupling constants (J) are given in hertz (Hz).

HRMS (ESI-TOF) spectra were recorded in positive ion mode. Observed values are reported to four decimal places and compared to the most abundant isotope.

### 1.3 Computational details:

All calculations were performed using the Gaussian09 suite.<sup>1</sup> Geometry optimizations and frequency calculations were carried out using the wB97XD functional with the 6-311+G(d,p) basis set and ultrafine integration grids.<sup>2,3</sup> BSSE corrections (<0.04 eV) were applied. Transition states (TS) were confirmed by a single imaginary frequency along the reaction coordinate. All minima (reactants, intermediates, and products) were confirmed by the absence of imaginary frequencies. Gibbs free energies ( $\Delta G$ ,  $\Delta G^\ddagger$ ) were calculated as the difference between reactants and products or transition states, respectively.

### 1.4 Photochemical Reaction Setup

Reactions were irradiated using a 40 W Kessil Blue LED lamp (A160WE Tuna Blue) placed 1–2 cm from the reaction vessel to ensure efficient excitation. The compact design and high output of the light source made it ideal for photocatalytic conditions [Figure S1 (a)].

### 1.5 Light Source and Spectral Profile

The photocatalytic reactions were carried out using a Kessil A160WE Tuna Blue LED lamp (40 W) positioned approximately 1–2 cm from the reaction vessel to ensure optimal light penetration. This light source offers a broad emission spectrum in the blue region, tailored to excite photocatalysts such as 10-Ph-PTZ efficiently. The spectral intensity distribution of the lamp confirms peak emission in the 430–460 nm range [Figure S1 (b)], which overlaps with the absorption spectrum of the photocatalyst employed in this study.

The emission spectrum and additional specifications for the Kessil A160WE lamp are available from the manufacturer:

<https://www.marine-aquatics.eu/en/kessil-a160we-tuna-blue-led-lighting-40w>

**(a)**

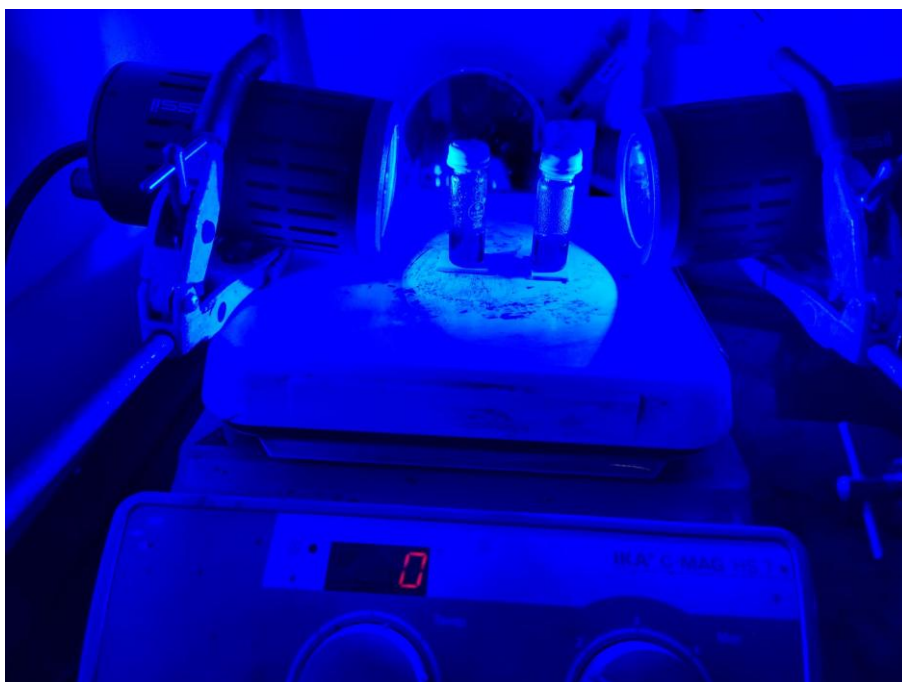

**(b)**

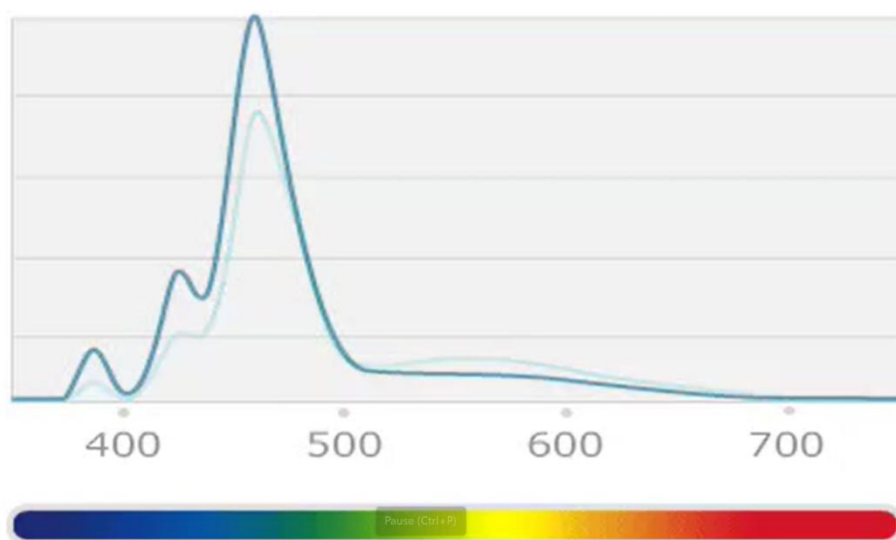

Figure S1: (a) Photochemical reaction setup & (b) Spectral Profile

## 2. General procedures

### 2.1 General procedure for the preparation of starting material

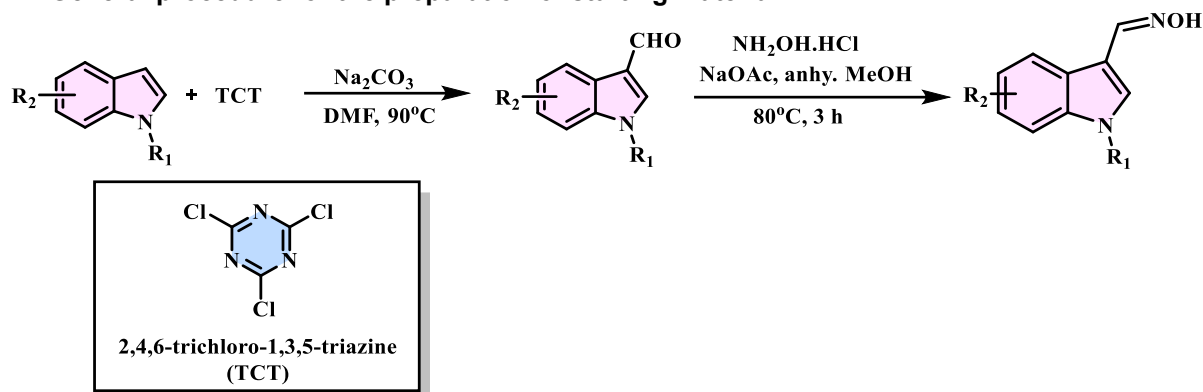

**Scheme S1.** Preparation of starting material

#### Step-1. Aldehyde formation<sup>4</sup>

Into an RB, TCT (5.42 mmol, 1 eq., 1 g) and DMF (2.6 mL) was added and permit is to stir for 1 h at room temperature. Then, the mixture was charged with either indole substrate (6.5mmol, 1.2 eq., 0.957g) and 3.5mL of DMF as solvent and stirred for 6 h at 90°C. When the reaction was completed (monitored by thin-layer chromatography), a saturated solution of Na<sub>2</sub>CO<sub>3</sub> (25 mL) was add to the mixture in order to hydrolyse the iminium salt for the formation of formyl group. Then, EtOAc (25 mL) was added to the reaction mixture. After separation of ethyl acetate layer from H<sub>2</sub>O, the aqueous phase was extracted with EtOAc (25 mL) again. The combined organic layers were then dried anhydrous Na<sub>2</sub>SO<sub>4</sub>, filtered, and concentrated in vacuum to yield the crude product. The crude product was purified by column chromatography (n-hexane/EtOAc) to obtain the desired purity.

#### Step-2. Oxime formation<sup>5</sup>

In a round-bottomed flask (50 mL) equipped with a football-shaped Teflon-coated magnetic stir bar is charged with aldehyde (0.2g, 1.1 mmol), hydroxylamine hydrochloride (NH<sub>2</sub>OH.HCl) (0.11g, 1.7 mmol) and anhydrous sodium acetate (NaOAc) (0.21 g, 2.6 mmol) in anhydrous methanol (10 mL) were added by plastic syringe to the flask. The flask is fitted with a water-cooled condenser and the junction of the glassware is sealed with a teflon tape. The reaction vessel is placed in a pre-heated silicon oil bath (80°C, oil bath temperature). The mixture was stirred under reflux conditions for 3h. The progress of the reaction was monitored by TLC. After completion of the reaction, the reaction vessel is removed from the oil bath and cooled to 24°C over 30 min. And then the reaction is quenched by H<sub>2</sub>O (10 mL) and the reaction mixture was continued to stirring for 5 min. The product has been extracted with EtOAc (3x15 mL). The combined organic layers were dried over anhy. Na<sub>2</sub>SO<sub>4</sub> and concentrated in vacuo to afford the pure carbaldehyde oxime products.

## Substrates studied in this reaction protocol

### Successful substrate

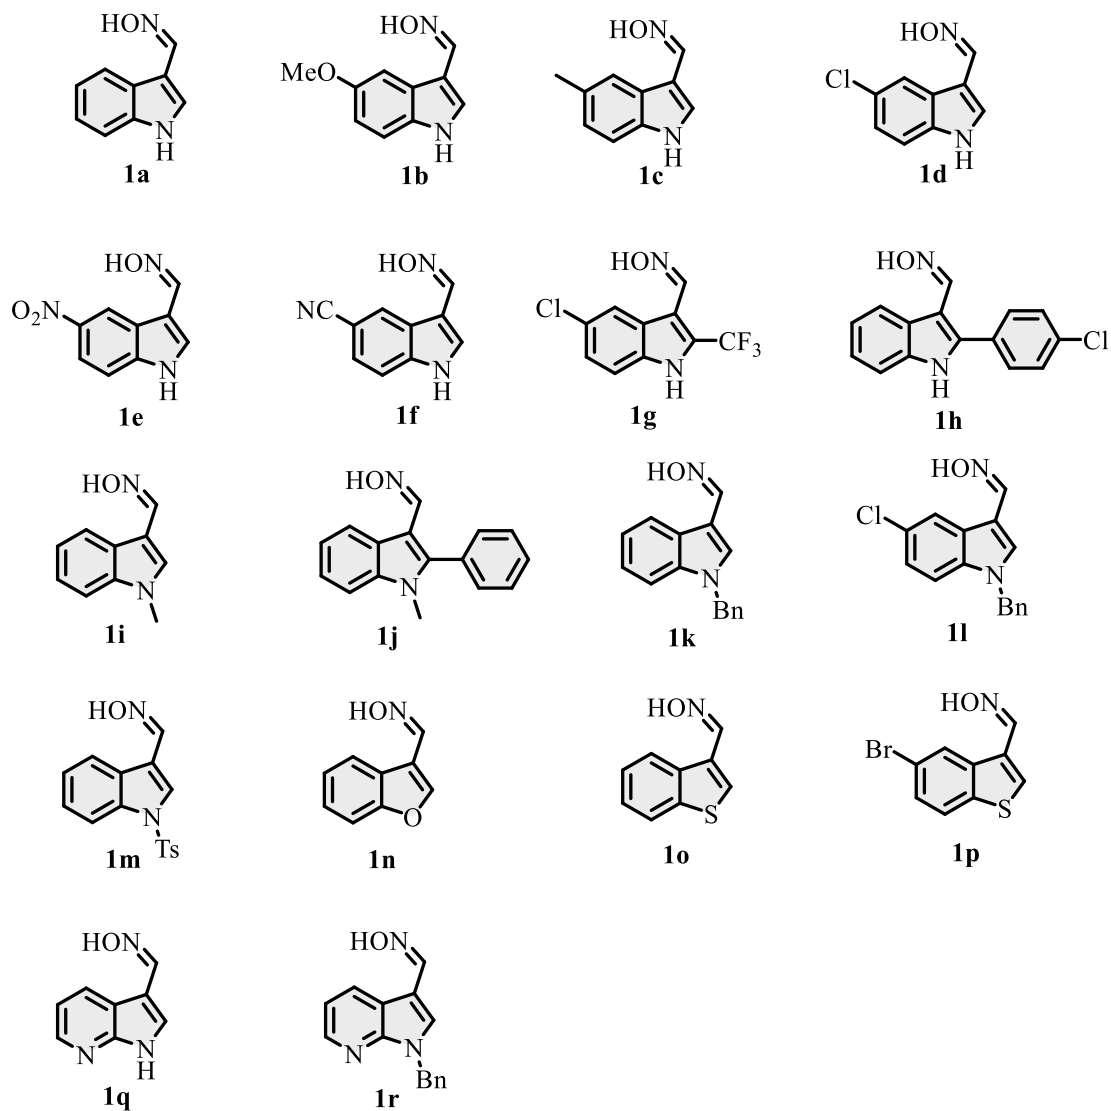

### Unsuccessful substrates

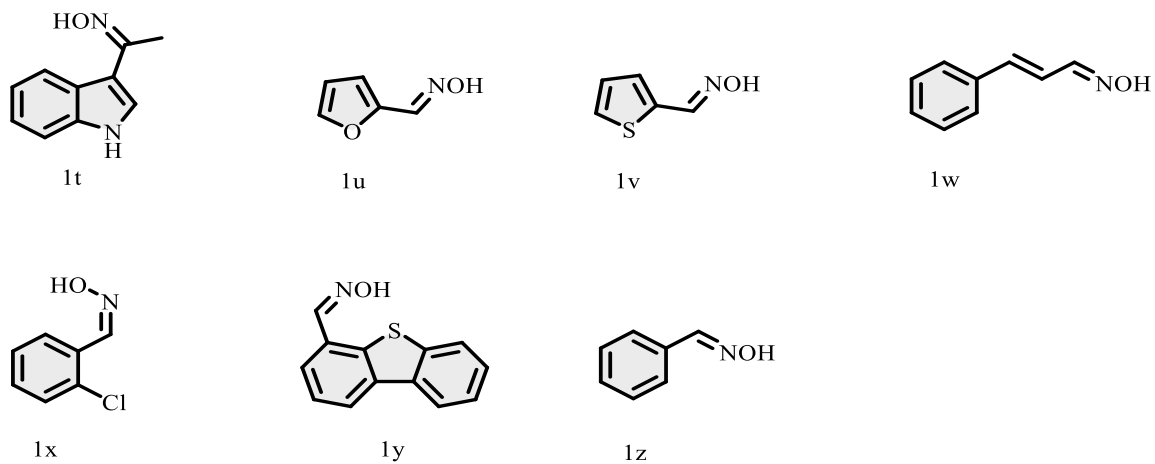

| Unsuccessful Oximes                                                                                                                      | Reason                                                                                                                                                                                                                                                                                                                                                                                                                                                                                                                                              |
|------------------------------------------------------------------------------------------------------------------------------------------|-----------------------------------------------------------------------------------------------------------------------------------------------------------------------------------------------------------------------------------------------------------------------------------------------------------------------------------------------------------------------------------------------------------------------------------------------------------------------------------------------------------------------------------------------------|
| <p>(1t) 1-(1H-indol-3-yl)ethanone oxime</p> 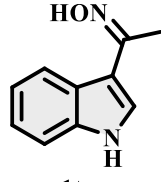 <p>1t</p>  | <p>The ketoxime structure is incompatible with the proposed mechanism because it lacks the necessary electronic and structural features required for key mechanistic steps. As in ketoxime there is methyl group in the place of H that's why ketoxime doesn't undergo HAT. As a result, ketoxime disfavored, preventing progression through the proposed reaction pathway.</p>                                                                                                                                                                     |
| <p>(1u) furan-2-carbaldehyde oxime</p>  <p>1u</p>       | <p>The furan ring is weakly aromatic and offers limited <math>\pi</math>-electron delocalization, resulting in poor stabilization of adjacent radical intermediates. In contrast, the benzene-fused indole framework in 1H-indole-3-carbaldehyde oxime enables efficient radical delocalization over an extended conjugated system, particularly at the C-3 position, providing significant stabilization. Consequently, the insufficient radical stabilization in the furan system makes it less compatible with the proposed radical pathway.</p> |
| <p>(1v) thiophene-2-carbaldehyde oxime</p>  <p>1v</p> | <p>Thiophene-2-carbaldehyde oxime provides much weaker heteroaromatic stabilization than 1H-indole-3-carbaldehyde oxime. The fused indole framework enables extensive <math>\pi</math>-delocalization and strong stabilization of radical intermediates, whereas the smaller thiophene ring offers limited conjugation with the oxime. As a result, radical delocalization and stabilization are insufficient in thiophene-2-carbaldehyde oxime, making the reaction pathway unfavorable.</p>                                                       |
| <p>(1w) cinnamaldehyde oxime</p>  <p>1w</p>           | <p>Cinnamaldehyde oxime lacks a heteroaromatic framework and therefore cannot effectively stabilize radical intermediates through <math>\pi</math>-delocalization. In contrast, 1H-indole-3-carbaldehyde oxime benefits from extensive radical delocalization within the indole <math>\pi</math> system and a favorable HAT that promotes reaction progression. The absence of both features in cinnamaldehyde oxime renders the proposed mechanistic pathway unfavorable.</p>                                                                      |
| <p>(1x) (Z)-2-chlorobenzaldehyde oxime</p>  <p>1x</p> | <p>(Z)-2-Chlorobenzaldehyde oxime lacks a heteroaromatic framework and therefore cannot provide effective <math>\pi</math>-conjugation or heteroatom-assisted radical delocalization. In contrast, 1H-indole-3-carbaldehyde oxime stabilizes radical intermediates through extensive delocalization within the indole <math>\pi</math> system and a favorable HAT. The absence of this hydrogen shift in the benzaldehyde oxime, together with the strong -I</p>                                                                                    |

|                                                                                                                                                                                |                                                                                                                                                                                                                                                                                                                                                                                                                                                                                                                                                                                                                                                                                                                                                                                                                           |
|--------------------------------------------------------------------------------------------------------------------------------------------------------------------------------|---------------------------------------------------------------------------------------------------------------------------------------------------------------------------------------------------------------------------------------------------------------------------------------------------------------------------------------------------------------------------------------------------------------------------------------------------------------------------------------------------------------------------------------------------------------------------------------------------------------------------------------------------------------------------------------------------------------------------------------------------------------------------------------------------------------------------|
|                                                                                                                                                                                | effect of the ortho-chloro substituent, further destabilizes reactive intermediates. As a result, (Z)-2-chlorobenzaldehyde oxime is incompatible with the proposed reaction mechanism.                                                                                                                                                                                                                                                                                                                                                                                                                                                                                                                                                                                                                                    |
| <p>(1y) dibenzo[b,d]thiophene-4-carbaldehyde oxime</p> 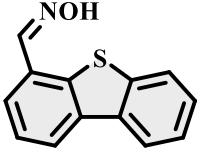 <p style="text-align: center;">1y</p> | Although dibenzo[b,d]thiophene-4-carbaldehyde oxime contains a heteroaromatic framework, it is far less effective than 1H-indole-3-carbaldehyde oxime in stabilizing radical intermediates. In indole systems, the C-3 position allows efficient radical delocalization over the pyrrolic nitrogen and the fused benzene ring, and a favorable HAT further promotes rearomatization and stabilization. In contrast, dibenzo[b,d]thiophene lacks comparable heteroatom-assisted conjugation and an accessible C-3 hydrogen, leading to poor radical delocalization. Additionally, its rigid fused aromatic structure imposes steric hindrance around the oxime group. Together, these electronic and steric limitations make dibenzo[b,d]thiophene-4-carbaldehyde oxime incompatible with the proposed reaction mechanism. |
| <p>(1z) benzaldehyde oxime</p>  <p style="text-align: center;">1z</p>                       | Benzaldehyde oxime lacks a heteroaromatic framework and therefore cannot effectively delocalize or stabilize radical intermediates. In contrast, 1H-indole-3-carbaldehyde oxime enables efficient radical delocalization through its conjugated indole system and supports a favorable HAT. The absence of these stabilizing features in benzaldehyde oxime makes it incompatible with the proposed reaction mechanism.                                                                                                                                                                                                                                                                                                                                                                                                   |

Thus, the success of our protocol critically depends on **C3-activated heteroaryl aldehyde oximes** (like indole-3-carbaldehyde oxime) that can **stabilize radical intermediates**, allow **HAT**, and undergo smooth radical recombination under the photocatalytic cycle.

## 2.2 General Procedure for cyanation of indole

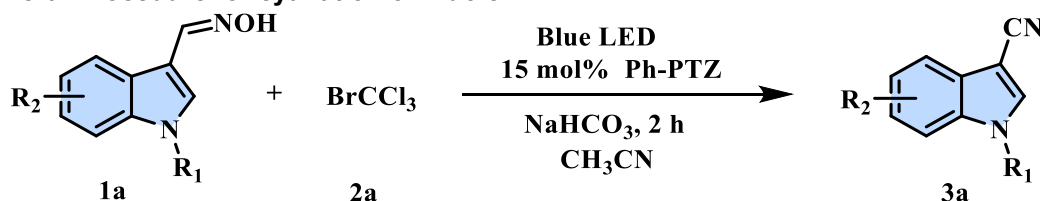

**Scheme S2.** Procedure for cyanation of indole

An oven-dried 10 mL Schlenk tube equipped with a magnetic stir bar was charged with 1H-indole-3-carbaldehyde oxime (0.3 mmol, 1 equiv.), photocatalyst 10-Ph-PTZ (0.04 mmol, 15 mol%), BrCCl<sub>3</sub> (1.87 mmol, 6 equiv.), and NaHCO<sub>3</sub> (0.6 mmol, 2 equiv.). The tube was then sealed, and three argon backfilling cycles were performed. Dry CH<sub>3</sub>CN (2 mL) was added under a flow of argon in the tightly sealed Schlenk tube. The reaction mixture was stirred at ambient temperature under irradiation with a 40 W Kessil Blue LED lamp (A160WE Tuna Blue) for 2 hours, as shown in Figure 1. After completion, the reaction was quenched with H<sub>2</sub>O (1 mL) and extracted three times with EtOAc. The combined organic layers were dried over anhydrous Na<sub>2</sub>SO<sub>4</sub> and concentrated under reduced pressure. The

crude product was purified by column chromatography (hexanes/EtOAc 10:1, followed by 10:4) to afford the desired product.

### 2.3 General Procedure for Carboxylation of 3-cyanoindole

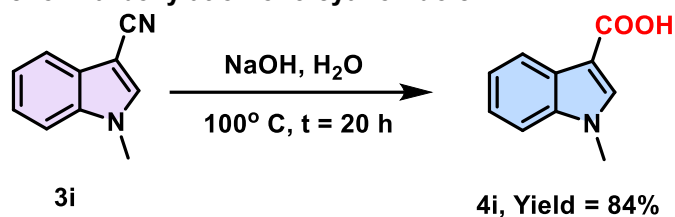

3i (50.71 mg, 0.2 mmol) was treated with NaOH (28.57 mg, 0.4 mmol) in H<sub>2</sub>O (0.71 mL) at 100 °C for 20 h. Then the mixture was acidified with dilute HCl/H<sub>2</sub>O to pH =5. The organic layer was washed with brine and dried by Na<sub>2</sub>SO<sub>4</sub>, and volatiles were evaporated to give 4i (490 mg, 84%) as a white solid.

### 2.4 General Procedure for the Amidation of 3-cyanoindole

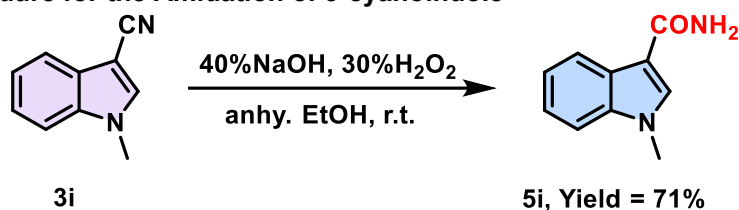

Synthesis of indole-3-carboxamide derivative (5i). To a stirred solution of 3i (0.2 mmol) in anhydrous ethanol was added 40% NaOH (66  $\mu$ L), then 41  $\mu$ L of 30% H<sub>2</sub>O<sub>2</sub> (1.39 mmol) was slowly added to the mixture upon monitoring by TLC. The precipitated solid was filtered off, washed with water, recrystallized from anhydrous ethanol, and dried in vacuum to give the respective product 5i.

### 3. One pot reaction for cyanation of indoles from indole 3- carbaldehyde

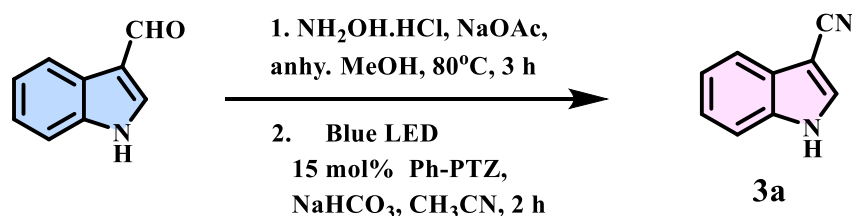

**Scheme S3:** Reaction in one pot

#### Procedure

In a one-pot procedure, a solution of 1H-indole-3-carbaldehyde (0.68 mmol), hydroxylamine NH<sub>2</sub>OH.HCl (1.03 mmol), and Sodium acetate NaOAc (1.58 mmol) in dry methanol (4 mL) was stirred at 80°C temperature for 3 h. After completion of the reaction (monitored by TLC), the dry methanol was evaporated under pressure in the rota vapour. An oven-dried round-bottom flask (RB) was equipped with a magnetic stir bar and charged with BrCCl<sub>3</sub> (3.74 mmol), 10-phenylphenothiazine (PC) (0.09 mmol), and sodium bicarbonate (NaHCO<sub>3</sub>) (1.2 mmol). The flask was sealed and subjected to three cycles of evacuation and backfilling with argon to ensure an inert atmosphere. And then dry CH<sub>3</sub>CN (3 mL) was added under a flow of argon in cork tight Schlenk tube. The mixture was then stirred at ambient temperature under the irradiation of 40W Kessil Blue LED (A 160WE Tuna Blue) for the stipulated time period (2 h) as shown in Figure 1. After 2 h of reaction, the reaction was quenched with H<sub>2</sub>O (1 mL) and then extracted 3 times with EtOAc. The combined organic layers were dried over anhydrous Na<sub>2</sub>SO<sub>4</sub> and concentrated under reduced pressure. The products were purified by column chromatography (hexanes/EtOAc 10/1 followed by hexanes/EtOAc 10/4), and dried to afford the corresponding product in 82% yield.

**\*\*Note:**  $\text{BrCCl}_3$  was acquired commercially and stored in a refrigerator under below  $10\text{ }^\circ\text{C}$ . Prior to the addition to the reaction mixture under inert condition in a well-ventilated fume hood, it has been broke down to room temperature.

#### 4. Gram-scale reaction procedure for the cyanation of indole

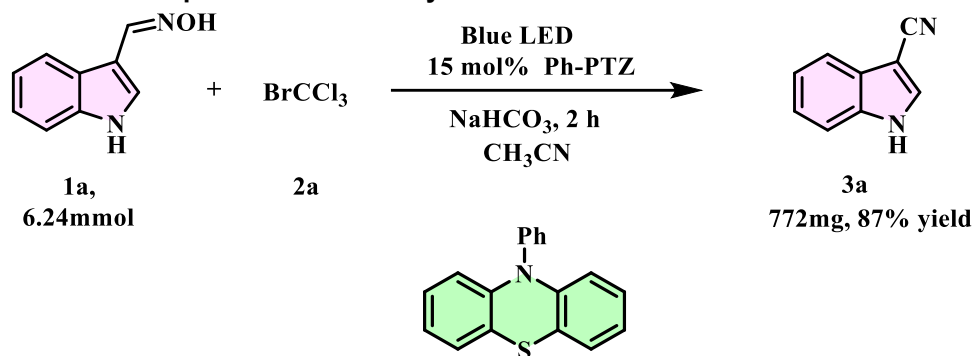

Recovered Ph-PTZ : 89%

**Scheme S4:** Gram-scale reaction

An oven-dried 50 mL pear shaped round-bottom flask was charged with 1H-indole-3-carbaldehyde oxime (6.2 mmol, 1 eq., 1 g), photocatalyst Ph-PTZ (0.93 mmol, 15mol%, 257.82 mg),  $\text{BrCCl}_3$  (37.45 mmol, 6eq., 3.6ml),  $\text{NaHCO}_3$  (12.48 mmol, 2eq., 1.04g). The Schlenk tube was sealed and subjected to three cycles of evacuation and backfilling with argon to ensure an inert atmosphere. And then dry  $\text{CH}_3\text{CN}$  (30 mL) was added under a flow of argon in cork tight Schlenk tube. The mixture was then stirred at ambient temperature under the irradiation of  $2 \times 40\text{W}$  Kessil Blue LED (A 160WE Tuna Blue) for the stipulated time period (2 h) as shown in Figure 2. After 6 h of reaction, the reaction was quenched with  $\text{H}_2\text{O}$  (10 mL) and then extracted 3 times with EtOAc. The combined organic layers were dried over anhydrous  $\text{Na}_2\text{SO}_4$  and concentrated under reduced pressure. The products were purified by column chromatography (hexanes/EtOAc 10/1 followed by hexanes/EtOAc 10/4).

#### 5. Mechanistic Investigation

Although the formation of intermediate **IV** is **proposed based on the mechanistic sequence**, our experimental attempts to directly detect or isolate it were unsuccessful. TLC monitoring revealed a transient new spot during the reaction, which we attempted to isolate; however, it either decomposed rapidly or converted to downstream products before characterization was possible. Both the immediate precursor (**III**) and subsequent intermediate (**V**) were detected by high-resolution mass spectrometry (HRMS), which is consistent with the proposed placement of **IV** in the catalytic cycle, although its exact lifetime and point of formation remain uncertain. While intermediate **IV** shares some structural similarity with the starting material **I**, there is a significant difference in the strength of the N–O bond. In intermediate **IV**, the presence of the trichloromethyl group weakens the N–O bond, rendering it redox-active.<sup>6,7</sup>

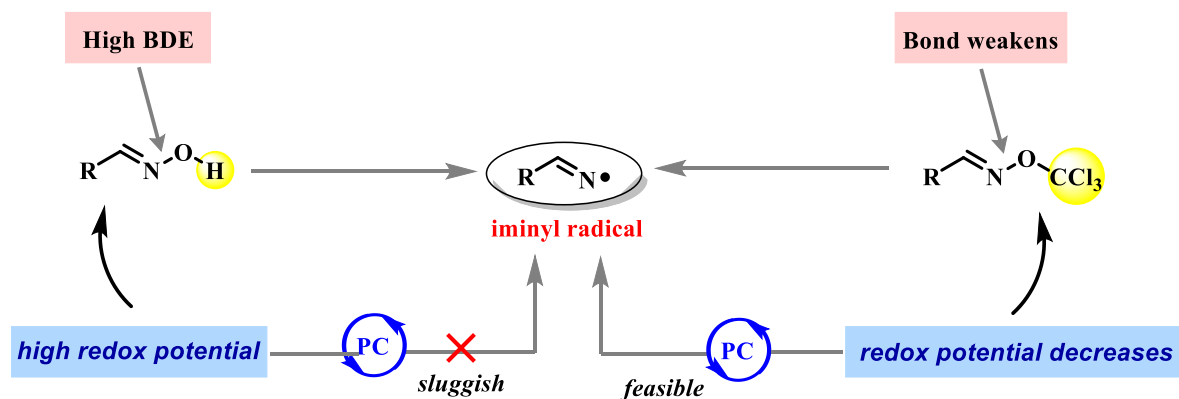

In contrast, the starting material **I** possesses a stronger N–O bond, which makes it redox-inactive, as further evidenced by fluorescence quenching experiments. Nonetheless, these observations are consistent with the proposed mechanism.

## 5.1 Radical Trapping Experiment

### 5.1.1 Diphenylethylene(DPE) as a radical scavenger

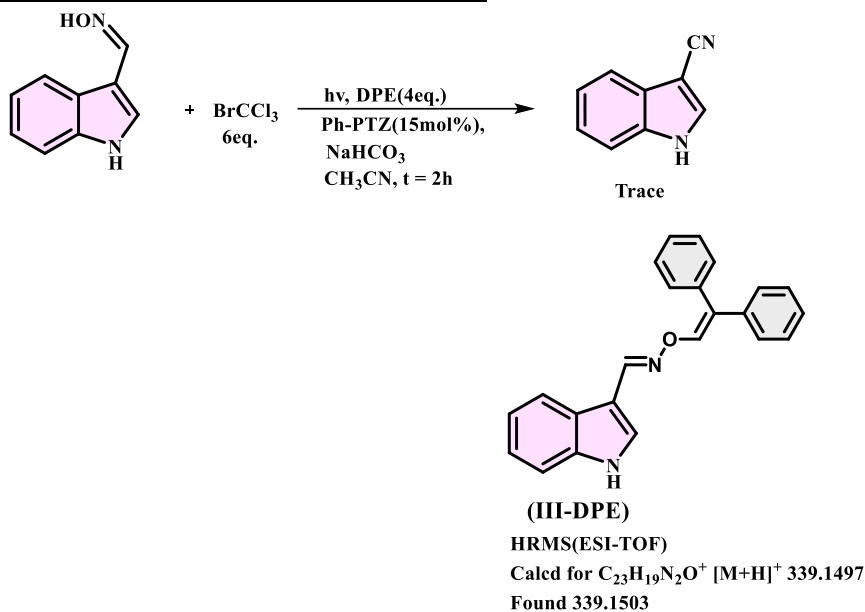

**Scheme S5.** Radical III trapped by DPE.

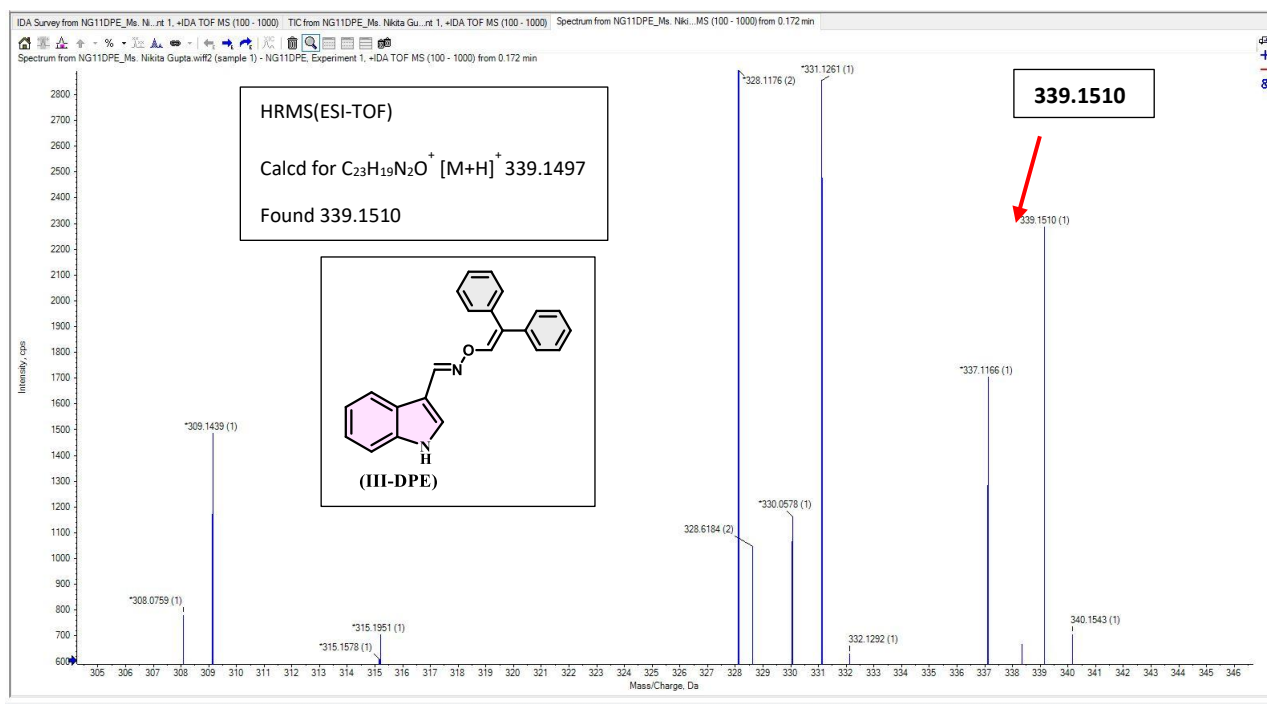

**Figure S2.** Radical III trapped by DPE.

### 5.1.2 1,4-Benzoquinone(1,4-Bq) as a radical scavenger

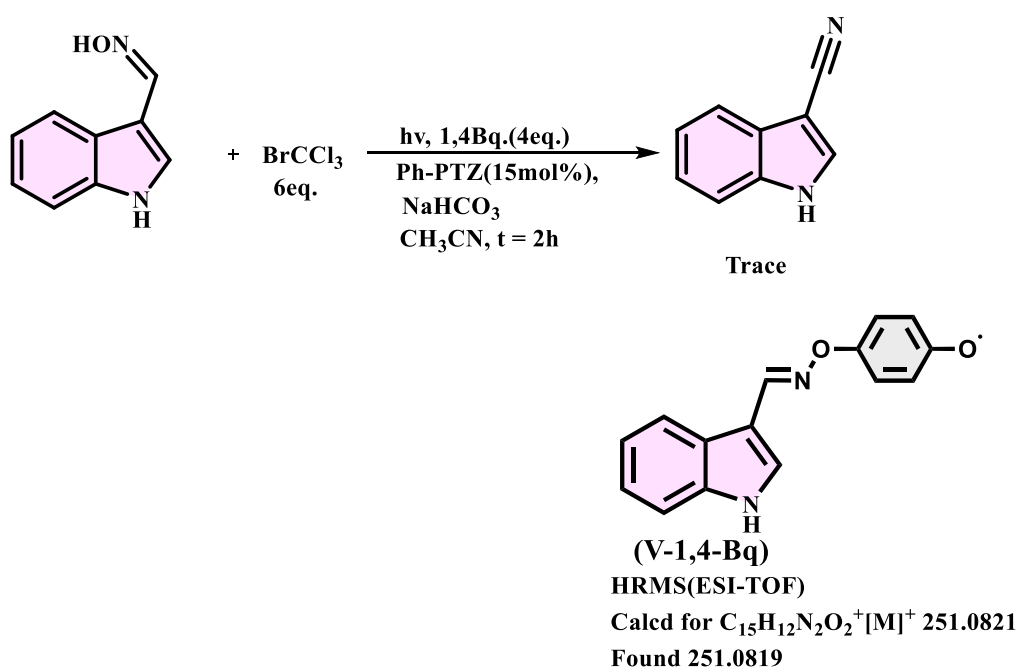

**Scheme S6.** Radical V trapped by 1,4-Benzoquinone.

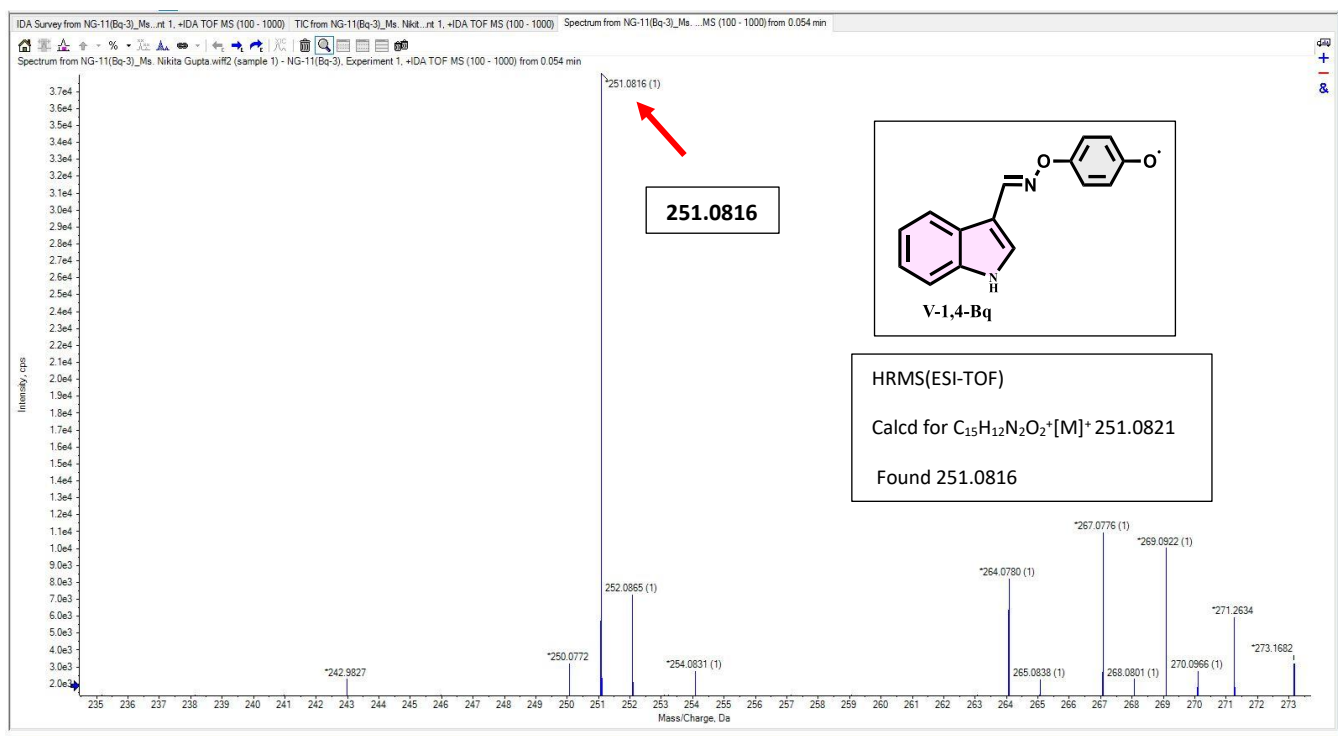

**Figure S3.** Radical V trapped by 1,4-Benzoquinone.

## 5.2 Luminescence Quenching Experiments

Fluorescence spectra were collected on JASCO Spectrofluorometer FP-8200 for all experiments. All Ph-PTZ solutions were excited at **320 nm** and the emission intensity was collected at **445 nm**. In each experiment, different samples were dissolved in CH<sub>3</sub>CN and placed in **1.0 cm quartz cuvettes**.

**Photocatalyst solution (10<sup>-3</sup> M):** To an oven dried 15 mL vial was added Ph-PTZ (2.7 mg) and acetonitrile (10 mL).

**BrCCl<sub>3</sub> solution (10<sup>-3</sup> M):** To an oven dried 15 mL vial was added BrCCl<sub>3</sub> (9.8 mg) and acetonitrile (10 mL).

**1H-indole-3-carbaldehyde oxime (10<sup>-3</sup> M):** To an oven dried 15 mL vial was added 1H-indole-3-carbaldehyde oxime (1.6 mg) and acetonitrile (10 mL).

Following preparation of these solutions, the solutions were allocated to the cuvettes and fluorescence quenching was determined with individual quenchers (**BrCCl<sub>3</sub>**, **1H-indole-3-carbaldehyde oxime**) with **Ph-PTZ**. And from the Figure S 5.3 it is clear that 1H-indole-3-carbaldehyde oxime does not act as a quencher and which give strength to our proposed mechanism. Fluorescence measurements were recorded at **445 nm**.

**Table S1.** Stern-Volmer quenching studies of oxidising agent BrCCl<sub>3</sub> (2a) with Ph-PTZ.

| Quencher Concentration | I       | I <sub>0</sub> /I |
|------------------------|---------|-------------------|
| 0                      | 1979.44 | 1                 |
| 5                      | 1731.67 | 1.14308           |
| 10                     | 1463.47 | 1.35257           |
| 15                     | 1239.17 | 1.59739           |
| 20                     | 1096.78 | 1.80477           |
| 25                     | 860.133 | 2.30132           |
| 30                     | 817.233 | 2.42212           |
| 35                     | 736.925 | 2.68608           |

**Table S2.** Stern-Volmer quenching studies of 1H-indole-3-carbaldehyde oxime (1a) with Ph-PTZ.

| Quencher Concentration | I       | I <sub>0</sub> /I |
|------------------------|---------|-------------------|
| 0                      | 1979.44 | 1                 |
| 5                      | 2185.47 | 0.90573           |
| 10                     | 2173.36 | 0.91077           |
| 15                     | 2166.02 | 0.91386           |
| 20                     | 2166.02 | 0.91386           |
| 25                     | 2149.25 | 0.92099           |
| 30                     | 2131.89 | 0.92849           |

|    |        |         |
|----|--------|---------|
| 35 | 2128.7 | 0.92988 |
|----|--------|---------|

(a) Fluorescence Spectra for PC and 1H-indole-3-carbaldehyde oxime used as a quencher.

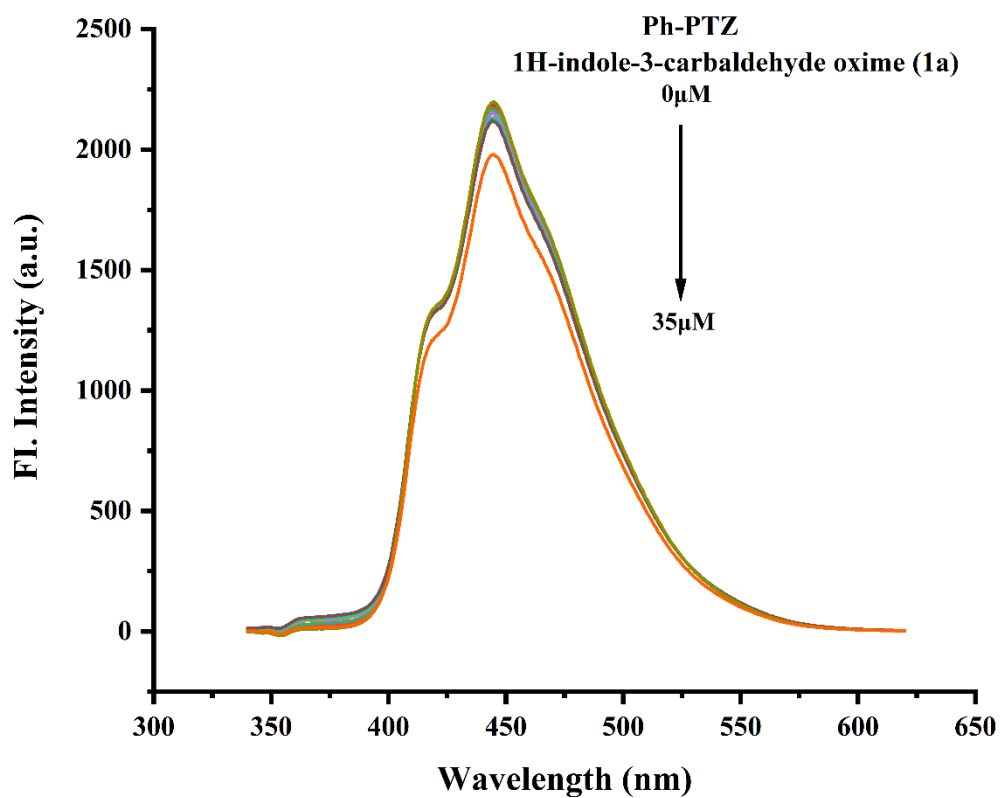

**Figure S4.** Fluorescence spectra of the photocatalyst (Ph-PTZ) in the presence of 1H-indole-3-carbaldehyde oxime.

(b) Fluorescence Spectra for PC and oxidising agent  $\text{BrCCl}_3$  used as a quencher

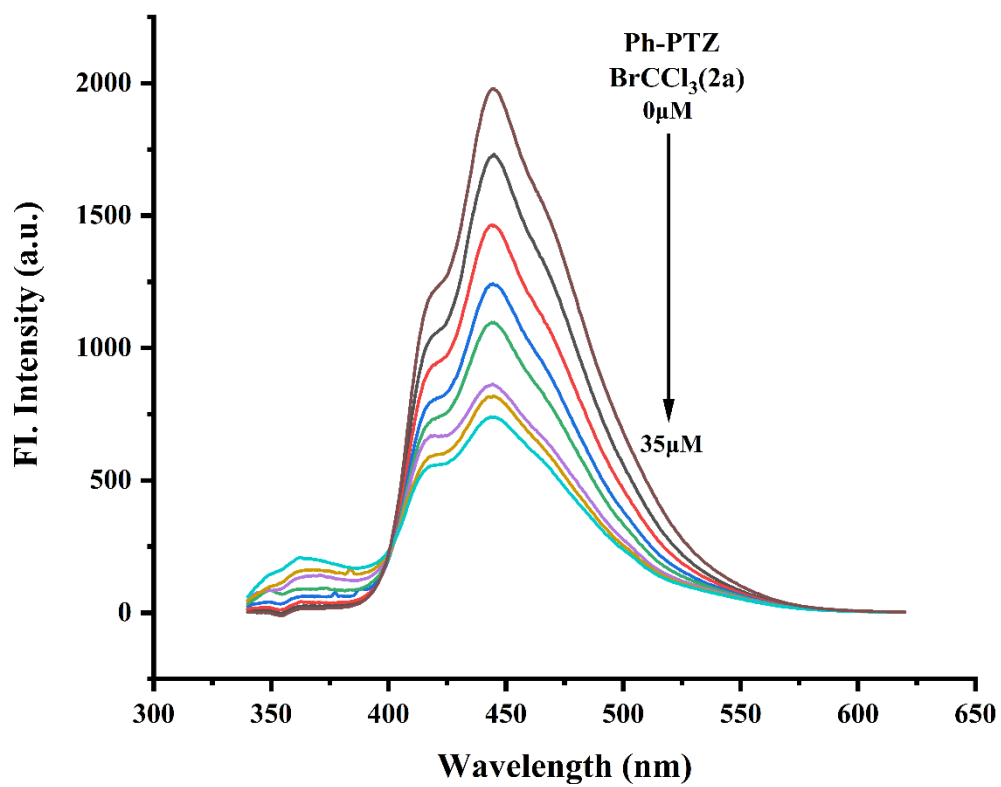

**Figure S5.** Fluorescence spectra of the photocatalyst (Ph-PTZ) in the presence of BrCCl<sub>3</sub> as a quencher.

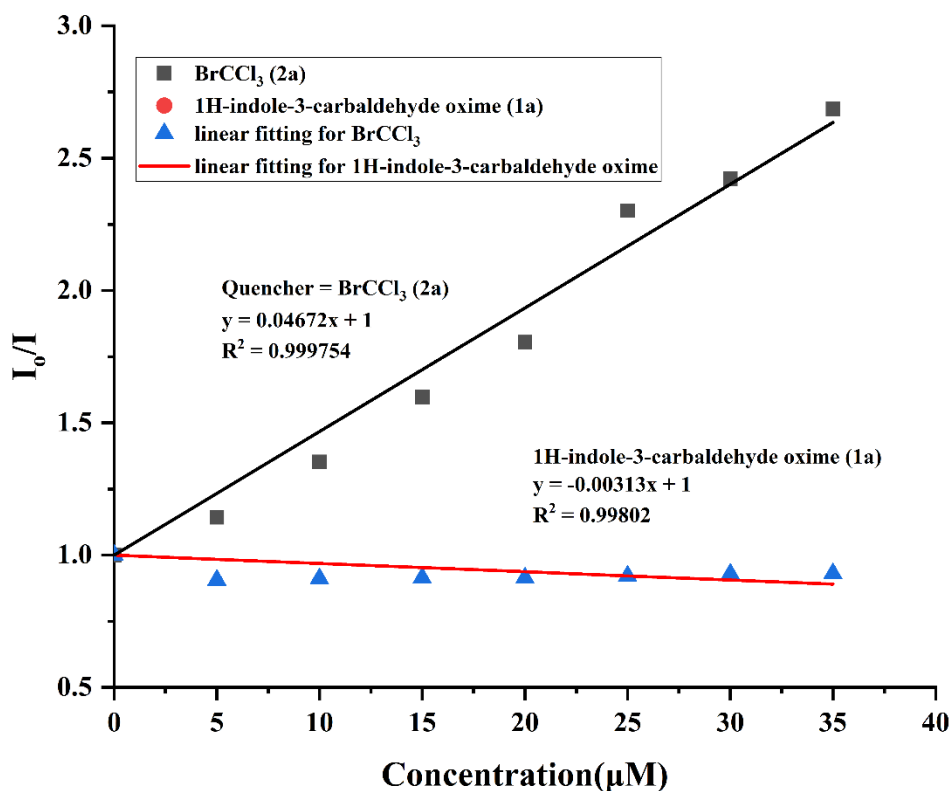

**Figure S6.** Stern–Volmer plot for the emission quenching of excited photocatalyst Ph-PTZ in CH<sub>3</sub>CN by different quenchers.

#### Discussion of Stern- Volmer Data

The Stern-Volmer quenching experiments reveal a pronounced decrease in the photoluminescence intensity of Ph-PTZ upon incremental addition of bromotrichloromethane (**2a**), indicating efficient dynamic quenching and confirming a strong interaction between the photoexcited catalyst (Ph-PTZ\*) and **2a**. In contrast, only a marginal decrease in luminescence intensity is observed upon addition of 1*H*-indole-3-carbaldehyde oxime (**1a**), with the Stern-Volmer slope approaching zero (−0.007). This negligible quenching effect clearly establishes that **1a** does not engage in direct excited-state interactions with Ph-PTZ\*, and therefore, does not function as an oxidative or reductive quencher in the catalytic cycle.

These results are fully consistent with our proposed redox-neutral radical cascade mechanism, in which BrCCl<sub>3</sub> serves as the primary electron acceptor from photoexcited Ph-PTZ\*, thereby generating the trichloromethyl radical and oxidized photocatalyst species. The lack of quenching by **1a** supports its role as a ground-state reactant, entering the catalytic cycle only after radical initiation, rather than participating in the initial photoinduced electron-transfer event.

#### Conclusion of Stern- Volmer Data

From Stern-Volmer data we concluded that, BrCCl<sub>3</sub> (**2a**) acted as a quencher and 1*H*-indole-3-carbaldehyde oxime (**1a**) didn't acts as a quencher.

## 6. Potential energy diagram of pathway 2

In pathway 2, the overall process is exergonic ( $\Delta G = -233.14 \text{ kcal mol}^{-1}$ ), the large kinetic barrier and endergonic SET make this pathway thermally inaccessible under visible-light conditions.

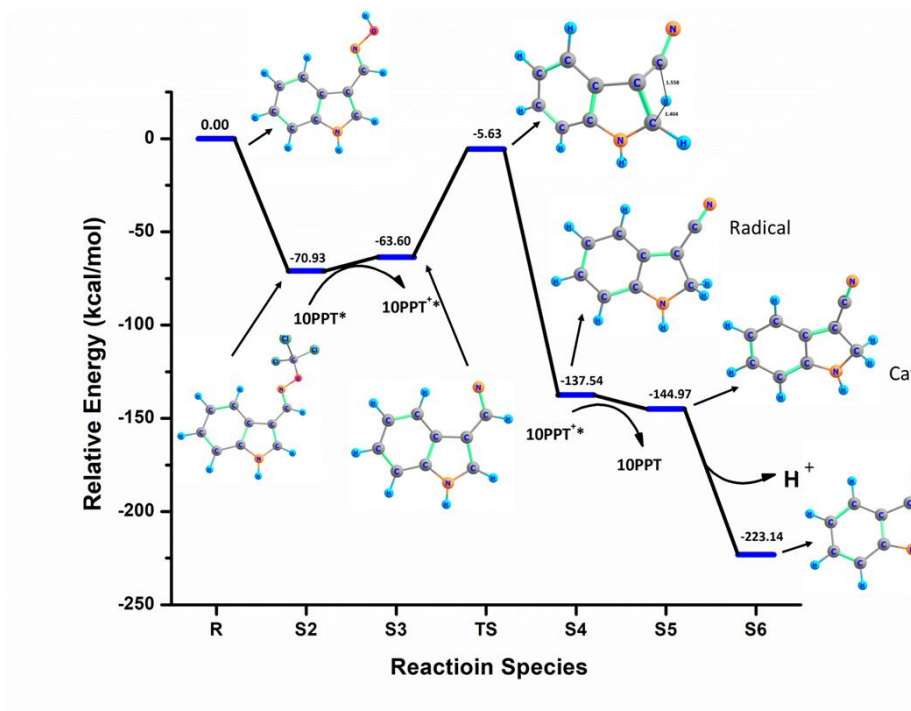

**Figure S7.** Potential energy diagram of pathway 2 calculated at wB97XD/6-311+G(d,p) level of theory.

## Plausible Mechanisms for pathway 2

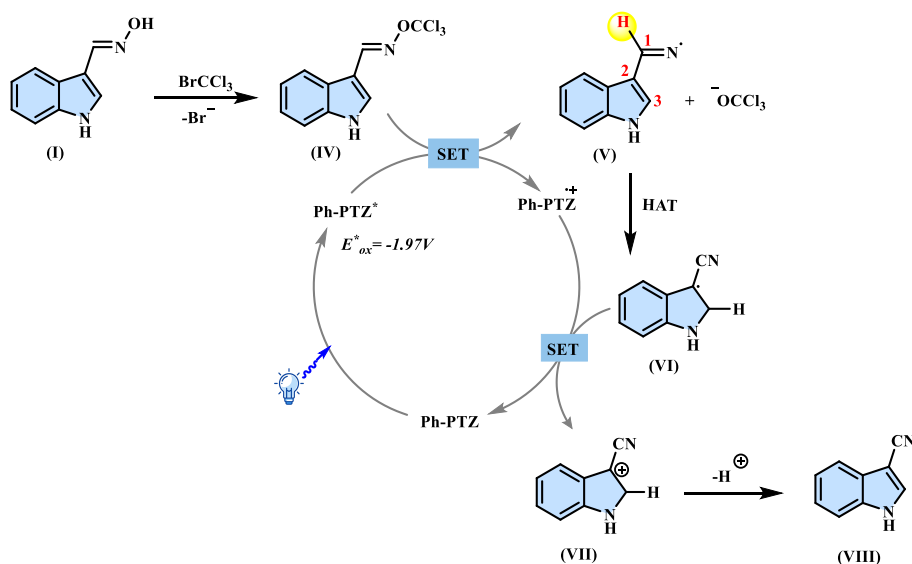

**Figure S8.** Plausible Mechanism of pathway 2.

### 7. Green Chemistry Metrics: Calculation of Eco-Scale

An important factor in green chemistry is the Eco Scale<sup>8</sup>. Eco Scale of the synthetic procedure to achieve the Cyano indole products have been calculated and based on this analysis, the environmental friendliness of the methodology has been determined. An Eco Scale of above 75 is considered an excellent green method, above 50 is acceptable, while scores below 50 indicate inadequate eco-friendliness. Eco Scale can be calculated as: Eco Scale = 100 - sum of the individual penalties

The individual penalties have been calculated as follows:

**Table S3:** Penalty points to calculate Eco Scale for product 3a

| Sl No. | Parameters              | Values                    | Penalty Points |
|--------|-------------------------|---------------------------|----------------|
| 1      | Yield                   | (100-99)/2                | 0.5            |
| 2      | Price of the substrate  | < \$10                    | 0              |
| 3      | Safety <sup>a</sup>     | Not dangerous             | 0              |
| 4      | Technical Setup         | Kessil Blue LED           | 2              |
| 5      | Temperature/Time        | Room temperature, < 24 h  | 1              |
| 6      | Workup add purification | Silica gel chromatography | 10             |
|        |                         | Total Penalty Points      | 13.5           |

<sup>a</sup> Based on the hazard warning symbols

Hence, Eco Scale = 100-13.5 = 88.5.

The calculated Eco Scale for the other synthesized cyano indoles are as follows:

| Compounds | Eco Scale | Compounds | Eco Scale |
|-----------|-----------|-----------|-----------|
| 3b        | 85        | 3k        | 73        |
| 3c        | 84        | 3l        | 72        |
| 3d        | 81        | 3m        | 67        |
| 3e        | 79.5      | 3n        | 66        |
| 3f        | 76        | 3o        | 85        |
| 3g        | 67.5      | 3p        | 82.5      |
| 3h        | 69        | 3q        | 80.5      |
| 3i        | 78.5      | 3r        | 81.5      |
| 3j        | 68        | 3s        | 70.5      |

 Excellent Green Method  
 Acceptable Method

## Comparison of other's method

### (A) Uludag's method

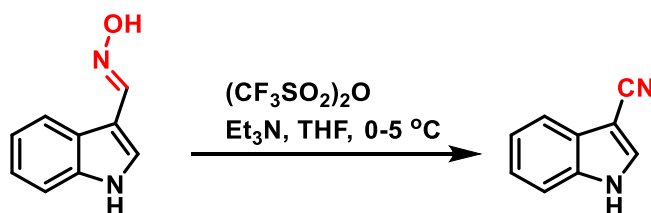

| SI No. | Parameters              | Values                    | Penalty Points |
|--------|-------------------------|---------------------------|----------------|
| 1      | Yield                   | $(100-79)/2$              | 10.5           |
| 2      | Price of the substrate  | < \$10                    | 0              |
| 3      | Safety <sup>a</sup>     | Not dangerous             | 0              |
| 4      | Technical Setup         | Simple stir               | 0              |
| 5      | Temperature/Time        | $0\text{ }^\circ\text{C}$ | 4              |
| 6      | Workup add purification | Silica gel chromatography | 10             |
|        |                         | Total Penalty Points      | 24.5           |

<sup>a</sup> Based on the hazard warning symbols

Hence, Eco Scale =  $100-24.5 = 75.5$ .

### (B) Ze-lin Li and group's method

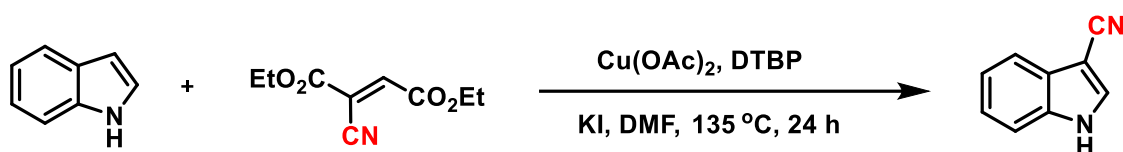

| SI No. | Parameters              | Values                                  | Penalty Points |
|--------|-------------------------|-----------------------------------------|----------------|
| 1      | Yield                   | $(100-63)/2$                            | 18.5           |
| 2      | Price of the substrate  | < \$10                                  | 0              |
| 3      | Safety <sup>a</sup>     | Not dangerous                           | 0              |
| 4      | Technical Setup         | Simple stir                             | 0              |
| 5      | Temperature/Time        | $135\text{ }^\circ\text{C}/24\text{ h}$ | 3              |
| 6      | Workup add purification | Silica gel chromatography               | 10             |

|  |  |                      |      |
|--|--|----------------------|------|
|  |  | Total Penalty Points | 31.5 |
|--|--|----------------------|------|

<sup>a</sup> Based on the hazard warning symbols

Hence, Eco Scale = 100-31.5 = 68.5.

(C) Sanjeeva Thunga and group's method

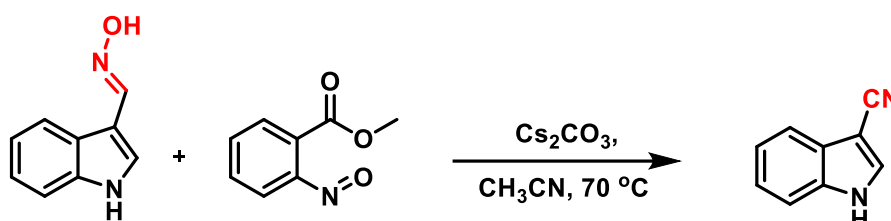

| SI No. | Parameters              | Values                    | Penalty Points |
|--------|-------------------------|---------------------------|----------------|
| 1      | Yield                   | (100-88)/2                | 6              |
| 2      | Price of the substrate  | < \$10                    | 0              |
| 3      | Safety <sup>a</sup>     | Not dangerous             | 0              |
| 4      | Technical Setup         | Simple stir               | 0              |
| 5      | Temperature/Time        | 70 °C >1 h                | 3              |
| 6      | Workup and purification | Silica gel chromatography | 10             |
|        |                         | Total Penalty Points      | 19             |

<sup>a</sup> Based on the hazard warning symbols

Hence, Eco Scale = 100-19 = 81.

(D) Dipak Patil and Dipak Dalal's method

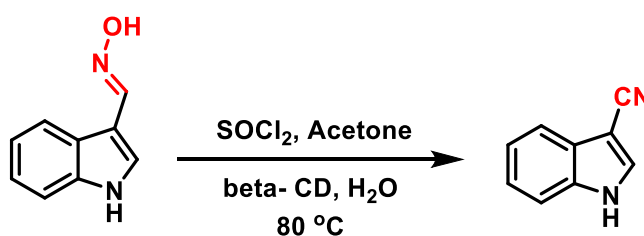

| SI No. | Parameters             | Values     | Penalty Points |
|--------|------------------------|------------|----------------|
| 1      | Yield                  | (100-94)/2 | 3              |
| 2      | Price of the substrate | < \$10     | 0              |

|   |                         |                           |    |
|---|-------------------------|---------------------------|----|
| 3 | Safety <sup>a</sup>     | Not dangerous             | 0  |
| 4 | Technical Setup         | Simple stir               | 0  |
| 5 | Temperature/Time        | 80 °C < 1 h               | 2  |
| 6 | Workup add purification | Silica gel chromatography | 10 |
|   |                         | Total Penalty Points      | 15 |

<sup>a</sup> Based on the hazard warning symbols

Hence, Eco Scale = 100-15 = 85.

**Table S4: Eco scale comparison of our work with the previously reported ones**

| Prior report                                  | Yield     | Eco Scale   |
|-----------------------------------------------|-----------|-------------|
| (a) N. Uludag <sup>9</sup>                    | 79        | 75.5        |
| (b) Ze-lin Li and group <sup>10</sup>         | 63        | 68.5        |
| (c) Sanjeeva Thunga and group <sup>11</sup>   | 88        | 81          |
| (d) Dipak Patil and Dipak Dalal <sup>12</sup> | 94        | 85          |
| <b>(e) Our Work</b>                           | <b>99</b> | <b>88.5</b> |

## 8. Evaluation of Green metrics<sup>13</sup>

### (A) Uludag's Method

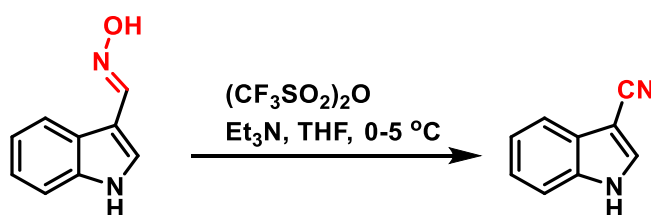

| Entry | Input                                        | Output                       |
|-------|----------------------------------------------|------------------------------|
| 1     | 1H-indole-3-carbaldehyde oxime 240.27 mg     | Indole-3-carbonitrile 168 mg |
| 2     | trifluoromethanesulfonic anhydride 846.42 mg |                              |
| 3     | Triethylamine 303.57 mg                      |                              |
| 4     | THF 10000 mg                                 |                              |
|       | Total mg 11390.26                            | Total 168 mg                 |

$$\text{E-Factor} = \frac{\text{Total input} - \text{Total output}}{\text{weight of product}} = \frac{11390.26 - 168}{168} = 66.8$$

$$\text{Mass Intensity} = \frac{\text{Total input}}{\text{weight of product}} = \frac{11390.26}{168} = 67.8$$

$$\text{Atom economy} = \frac{\text{Molecular weight of Product}}{\text{Summation of Molecular weight of reagents used}} \times 100$$

$$= \frac{142.16}{160.18+101.19+282.14} \times 100 = 26.15 \%$$

$$\text{Atom efficiency} = \text{Atom economy \%} \times \% \text{ Yield of the product}$$

$$= 26.15 \% \times 79 \% = 20.65 \%$$

### (B) Ze-lin Li and group's method

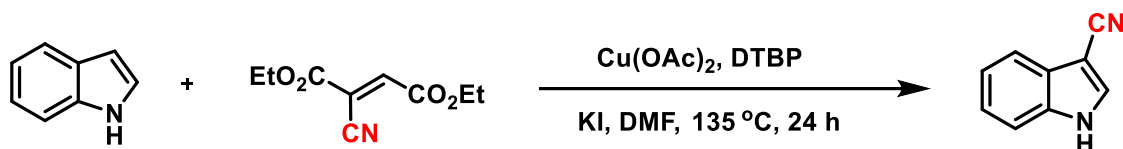

| Entry | Input                              | Output                        |
|-------|------------------------------------|-------------------------------|
| 1     | 1H-indole                          | Indole-3-carbonitrile 44.7 mg |
| 2     | ethyl(ethoxymethylene)cyanoacetate |                               |
| 3     | Cu(OAc) <sub>2</sub>               |                               |
| 4     | DTBP                               |                               |
| 5     | KI                                 |                               |
| 6     | DMF                                |                               |
|       | Total                              | Total 44.7 mg                 |

$$\text{E-Factor} = \frac{\text{Total input} - \text{Total output}}{\text{weight of product}} = \frac{2582.76 - 44.7}{44.7} = 56.77$$

$$\text{Mass Intensity} = \frac{\text{Total input}}{\text{weight of product}} = \frac{2582.76}{44.7} = 57.77$$

$$\text{Atom economy} = \frac{\text{Molecular weight of Product}}{\text{Summation of Molecular weight of reagents used}} \times 100$$

$$= \frac{142.16}{117.15+169.18+181.63+166+146.23} \times 100 = 18.22 \%$$

$$\text{Atom efficiency} = \text{Atom economy \%} \times \% \text{ Yield of the product}$$

$$= 18.22 \% \times 63 \% = 11.47 \%$$

### (C) Sanjeeva Thunga and group's method

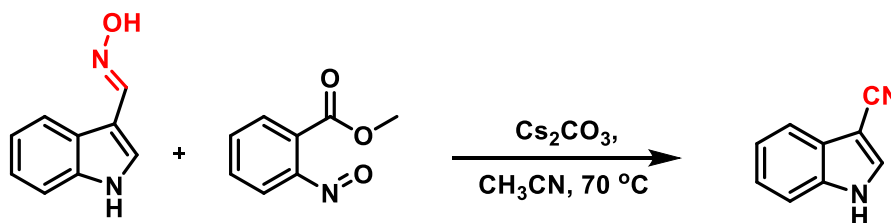

| Entry | Input                           | Output                         |
|-------|---------------------------------|--------------------------------|
| 1     | 1H-indole-3-carbaldehyde oxime  | Indole-3-carbonitrile 125.1 mg |
| 2     | methyl 2-nitrosobenzoate        |                                |
| 3     | Cs <sub>2</sub> CO <sub>3</sub> |                                |
| 4     | Dry CH <sub>3</sub> CN          |                                |
|       | Total                           | Total 125.1 mg                 |

$$\text{E-Factor} = \frac{\text{Total input} - \text{Total output}}{\text{weight of product}} = \frac{2651.14 - 125.1}{125.1} = 20.19$$

$$\text{Mass Intensity} = \frac{\text{Total input}}{\text{weight of product}} = \frac{2651.14}{125.1} = 21.19$$

$$\begin{aligned} \text{Atom economy} &= \frac{\text{Molecular weight of Product}}{\text{Summation of Molecular weight of reagents used}} \times 100 \\ &= \frac{142.16}{160.18 + 165.14 + 325.82} \times 100 = 21.83\% \end{aligned}$$

$$\begin{aligned} \text{Atom efficiency} &= \text{Atom economy \%} \times \% \text{ Yield of the product} \\ &= 21.83\% \times 88\% = 19.21\% \end{aligned}$$

#### (D) Dipak Patil and Dipak Dalal's method

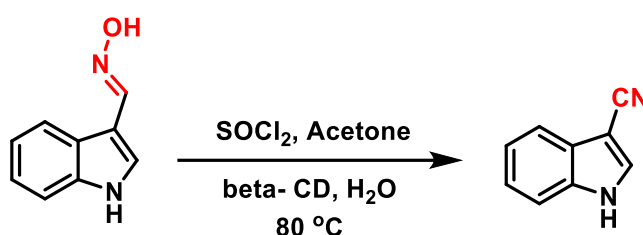

| Entry | Input                          | Output    |        |
|-------|--------------------------------|-----------|--------|
| 1     | 1H-indole-3-carbaldehyde oxime | 800.9 mg  |        |
| 2     | SOCI2                          | 713.82 mg |        |
| 3     | beta-CD                        | 567.5 mg  |        |
| 4     | H2O                            | 10000 mg  |        |
| 5     | Acetone                        | 2000 mg   |        |
|       | Total mg                       | 14082.22  |        |
|       |                                | Total mg  | 668.15 |

$$\text{E-Factor} = \frac{\text{Total input} - \text{Total output}}{\text{weight of product}} = \frac{14082.22 - 668.15}{668.15} = 20.07$$

$$\text{Mass Intensity} = \frac{\text{Total input}}{\text{weight of product}} = \frac{14082.22}{668.15} = 21.07$$

$$\begin{aligned} \text{Atom economy} &= \frac{\text{Molecular weight of Product}}{\text{Summation of Molecular weight of reagents used}} \times 100 \\ &= \frac{142.16}{160.18 + 118.97 + 1135} \times 100 = 9.92\% \end{aligned}$$

$$\begin{aligned} \text{Atom efficiency} &= \text{Atom economy \%} \times \% \text{ Yield of the product} \\ &= 9.92\% \times 94\% = 9.32\% \end{aligned}$$

#### (E) Our Method

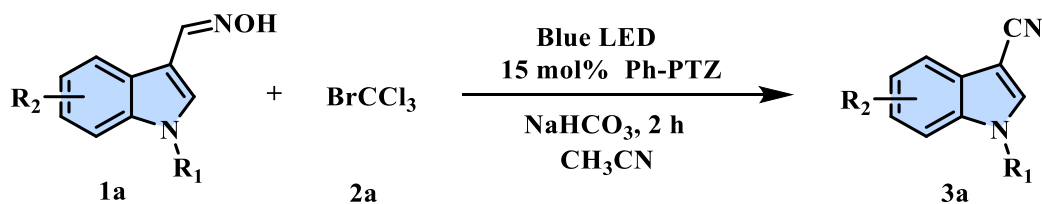

| Entry | Input                                         | Output                         |
|-------|-----------------------------------------------|--------------------------------|
| 1     | 1 <i>H</i> -indole-3-carbaldehyde oxime 50 mg | Indole-3-carbonitrile 42.22 mg |
| 2     | BrCCl <sub>3</sub> 370.76 mg                  | Ph-PTZ 10.05 mg                |
| 3     | Ph-PTZ 12.39 mg                               | Dry CH <sub>3</sub> CN 2000 mg |
| 4     | NaHCO <sub>3</sub> 50.4mg                     |                                |
| 5     | Dry CH <sub>3</sub> CN 2000 mg                |                                |
|       | Total 2483 mg                                 | Total 2052.27 mg               |

$$\text{E-Factor} = \frac{\text{Total input} - \text{Total output}}{\text{weight of product}} = \frac{2483 - 2052.27}{42.22} = 10.2$$

$$\text{Mass Intensity} = \frac{\text{Total input}}{\text{weight of product}} = \frac{2483}{42.22} = 58.81$$

$$\begin{aligned} \text{Atom economy} &= \frac{\text{Molecular weight of Product}}{\text{Summation of Molecular weight of reagents used}} \times 100 \\ &= \frac{142.16}{160.18 + 198.27 + 275.37 + 84} \times 100 = 19.8\% \end{aligned}$$

$$\begin{aligned} \text{Atom efficiency} &= \text{Atom economy \%} \times \% \text{ Yield of the product} \\ &= 19.8\% \times 99\% = 19.6\% \end{aligned}$$

**Table S5.** A comparison of "green-ness" among the catalysts/reagents in the cyanation of indole oxime and indole

| Prior Report/Catalyst/Reagent                                                                                                               | Eco-scale   | E-factor <sup>a</sup> | MI <sup>b</sup> | AE <sup>c</sup> (%) | AEff <sup>d</sup> (%) | Time       | Yield (%) | Key Features                                                                     |
|---------------------------------------------------------------------------------------------------------------------------------------------|-------------|-----------------------|-----------------|---------------------|-----------------------|------------|-----------|----------------------------------------------------------------------------------|
| <b>N. Uludag<sup>9</sup>:</b><br>Oxime, trifluoromethanesulfonic anhydride, NEt <sub>3</sub> , THF                                          | 75.5        | 66.8                  | 67.8            | 26.15               | 20.65                 | 3.5 h      | 79        | Uses corrosive and hygroscopic (CF <sub>3</sub> SO <sub>2</sub> ) <sub>2</sub> O |
| <b>Ze-lin Li and group<sup>10</sup>:</b><br>Indole, ethyl(ethoxymethylene)cynoacetate, Cu(OAc) <sub>2</sub> , DTBP, KI, DMF                 | 68.5        | 56.77                 | 57.77           | 18.22               | 11.47                 | 24 h       | 63        | Uses activated cyanation reagent                                                 |
| <b>Sanjeeva Thunga and group<sup>11</sup>:</b><br>Oxime, methyl 2-nitrosobenzoate, Cs <sub>2</sub> CO <sub>3</sub> , dry CH <sub>3</sub> CN | 81          | 20.19                 | 21.19           | 21.83               | 19.21                 | 4 h        | 88        | Thermal conditions                                                               |
| <b>Dipak Patil and Dipak Dalal<sup>12</sup>:</b><br>Oxime, SOCl <sub>2</sub> , beta-CD, H <sub>2</sub> O, Acetone                           | 85          | 20.07                 | 21.07           | 9.92                | 9.32                  | 20 min     | 94        | Requires heating                                                                 |
| <b>Our Work:</b><br>Oxime, BrCCl <sub>3</sub> , Ph-PTZ, NaHCO <sub>3</sub> , dry CH <sub>3</sub> CN                                         | <b>88.5</b> | <b>10.2</b>           | <b>58.81</b>    | <b>19.8</b>         | <b>19.6</b>           | <b>2 h</b> | <b>99</b> | <b>Metal-free, visible light, no cyanide reagents, room temperature</b>          |

<sup>a,b</sup>: Mass intensity values were calculated including solvent mass, whereas E-factor values were determined excluding solvent contributions for consistency with literature reports. The mass intensity (58.81), which includes solvent contribution, reflects the total material input of the reaction system. <sup>c</sup>: AE-Atom Economy. <sup>d</sup>: AEff-Atom Efficiency.

## 9. Sensitivity test for the reaction<sup>14</sup>

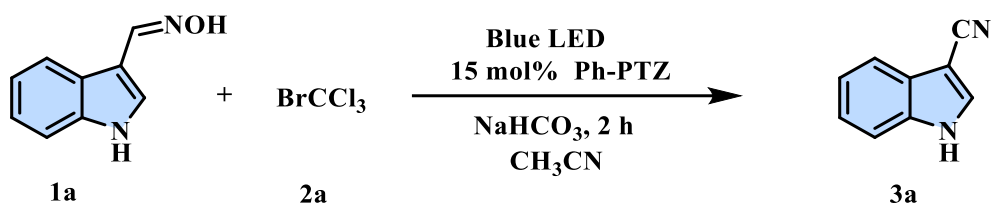

Performed using general procedure 2.2. All experiments were performed on a 0.2 mmol scale (except scale-up).

**Table S6:** Sensitivity assessment for the formation of 3-cyanoindole.

| Entry | Modification          | Deviation from standard Conditions                                         | Yield <sup>a</sup> | Deviation from optimal yield |
|-------|-----------------------|----------------------------------------------------------------------------|--------------------|------------------------------|
| 1     | High concentration    | 500 $\mu$ L CH <sub>3</sub> CN                                             | 70%                | -29%                         |
| 2     | Low concentration     | 4 mL CH <sub>3</sub> CN                                                    | 83%                | -16%                         |
| 3     | Low H <sub>2</sub> O  | Solvent: CH <sub>3</sub> CN (2mL) + 25% H <sub>2</sub> O (0.5mL)           | 46%                | -53%                         |
| 4     | Medium O <sub>2</sub> | solvent sparged with air, reaction then carried out under argon atmosphere | 73%                | -26%                         |
| 5     | High O <sub>2</sub>   | reactions set up and carried out on air                                    | 63%                | -36%                         |
| 6     | Low intensity         | reaction carried out with minimum light intensity                          | 70%                | -29%                         |
| 7     | High intensity        | reaction carried out with highest light intensity                          | 99%                | 0                            |
| 8     | Scale up              | 6.2 mmol scale according to general procedure 4                            | 87%                | -12%                         |

Based on the deviation yields from the **Table S8**, a radar diagram is plotted.

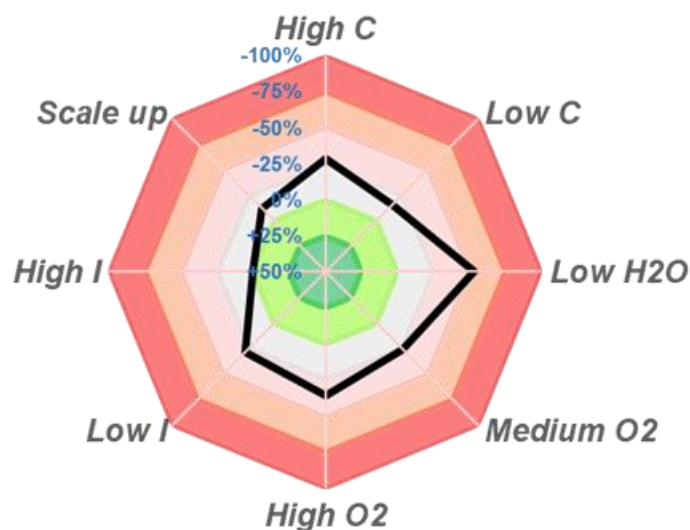

Figure S9: Sensitivity Screening.

## 10. Cyano-indoles accessible by prior methods and our method

Table S7. Table of comparison of cyano-indoles accessible by prior methods and our method

| Cyano-indoles accessible by prior methods                                                                  |        |                                                                 | Cyano-indoles accessible by our method                                                                     |                                                                                                             |                                                                                                              |                                                                                                              |
|------------------------------------------------------------------------------------------------------------|--------|-----------------------------------------------------------------|------------------------------------------------------------------------------------------------------------|-------------------------------------------------------------------------------------------------------------|--------------------------------------------------------------------------------------------------------------|--------------------------------------------------------------------------------------------------------------|
| 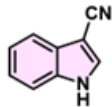 <p>Only one example</p> |        |                                                                 |  <p>3a<br/>99 %, 2 h</p> |  <p>3b<br/>96 %, 2 h</p> |  <p>3c<br/>94 %, 2h</p>  |  <p>3d<br/>88 %, 2h</p>  |
| Yield                                                                                                      | Time   | Reference                                                       |  <p>3e<br/>85 %, 2h</p> |  <p>3f<br/>78 %, 2h</p> |  <p>3g<br/>61 %, 4h</p> |  <p>3h<br/>64 %, 4h</p> |
| 72 %                                                                                                       | 2 h    | <i>J. Org. Chem.</i> 2009, 74, 8, 3079–3084                     |  <p>3i<br/>83 %, 2h</p> |  <p>3j<br/>62 %, 4h</p> |  <p>3k<br/>72 %, 4h</p> |  <p>3l<br/>70 %, 4h</p> |
| 79 %                                                                                                       | 3.5 h  | <i>Russ. J. Org. Chem.</i> 2020, Vol. 56, No. 9, pp. 1640–1645. |  <p>3m<br/>58 %, 4h</p> |  <p>3n<br/>96 %, 2h</p> |  <p>3o<br/>91 %, 2h</p> |  <p>3p<br/>87 %, 2h</p> |
| 95 %                                                                                                       | 6 h    | <i>Asian J. Org. Chem.</i> 202 4,13,e202400291(2of 4)           |  <p>3q<br/>89 %, 2h</p> |  <p>3r<br/>67 %, 4h</p> |                                                                                                              |                                                                                                              |
| 88 %                                                                                                       | 4 h    | <i>ChemistrySelect</i> 2018,3,4425–4429                         |                                                                                                            |                                                                                                             |                                                                                                              |                                                                                                              |
| 89 %                                                                                                       | -      | <i>Synthesis</i> 2007, No. 20, 3179–3184                        |                                                                                                            |                                                                                                             |                                                                                                              |                                                                                                              |
| 87 %                                                                                                       | -      | <i>Synlett</i> 2004, No. 11, 2019–2021                          |                                                                                                            |                                                                                                             |                                                                                                              |                                                                                                              |
| 94 %                                                                                                       | 20 min | <i>Synthetic Communications</i> , 1, 43: 118–128, 2013          |                                                                                                            |                                                                                                             |                                                                                                              |                                                                                                              |
| 99 %                                                                                                       | 2 h    | Our work                                                        |                                                                                                            |                                                                                                             |                                                                                                              |                                                                                                              |

## 11. X-ray crystal structure of 3a

To a 10 mL tube containing 3a (20.0 mg) was added to chloroform (4 mL). A clear solution was obtained and was kept at room temperature and the crystals were obtained after the solvent evaporated, which were characterized by single crystal X-ray diffraction. X-ray diffraction experiment was carried out on a XtaLAB Synergy-i and the data obtained were deposited at the Cambridge Crystallographic Data Centre.<sup>15</sup>

|                     |                                              |
|---------------------|----------------------------------------------|
| Identification code | N-11-R-1_auto                                |
| Empirical formula   | C <sub>9</sub> H <sub>6</sub> N <sub>2</sub> |
| Formula weight      | 142.16                                       |
| Temperature/K       | 293(2)                                       |

|                                             |                                                               |
|---------------------------------------------|---------------------------------------------------------------|
| Crystal system                              | orthorhombic                                                  |
| Space group                                 | Pca2 <sub>1</sub>                                             |
| a/Å                                         | 13.9424(4)                                                    |
| b/Å                                         | 5.9908(2)                                                     |
| c/Å                                         | 8.9036(3)                                                     |
| α/°                                         | 90                                                            |
| β/°                                         | 90                                                            |
| γ/°                                         | 90                                                            |
| Volume/Å <sup>3</sup>                       | 743.68(4)                                                     |
| Z                                           | 4                                                             |
| ρ <sub>calc</sub> /cm <sup>3</sup>          | 1.270                                                         |
| μ/mm <sup>-1</sup>                          | 0.623                                                         |
| F (000)                                     | 296.0                                                         |
| Crystal size/mm <sup>3</sup>                | 0.15 × 0.13 × 0.12                                            |
| Radiation                                   | Cu Kα (λ = 1.54184)                                           |
| 2θ range for data collection/°              | 12.698 to 136.054                                             |
| Index ranges                                | -16 ≤ h ≤ 16, -7 ≤ k ≤ 7, -9 ≤ l ≤ 10                         |
| Reflections collected                       | 7801                                                          |
| Independent reflections                     | 1188 [R <sub>int</sub> = 0.0428, R <sub>sigma</sub> = 0.0225] |
| Data/restraints/parameters                  | 1188/1/100                                                    |
| Goodness-of-fit on F <sup>2</sup>           | 1.145                                                         |
| Final R indexes [ I  ≥ 2σ (I)]              | R <sub>1</sub> = 0.0385, wR <sub>2</sub> = 0.0949             |
| Final R indexes [all data]                  | R <sub>1</sub> = 0.0426, wR <sub>2</sub> = 0.0978             |
| Largest diff. peak/hole / e Å <sup>-3</sup> | 0.11/-0.15                                                    |
| Flack parameter                             | -0.1(4)                                                       |

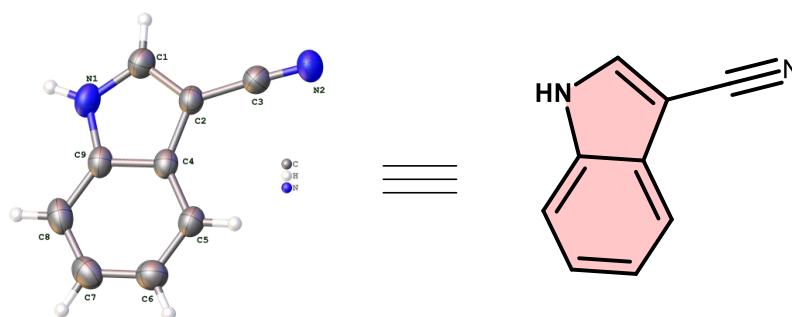

**Figure S10.** X-ray crystal structure of 1H-indole-3-carbonitrile (3a)

**Table S8** Fractional Atomic Coordinates ( $\times 10^4$ ) and Equivalent Isotropic Displacement Parameters ( $\text{\AA}^2 \times 10^3$ ) for N-11-R-1\_auto.  $U_{eq}$  is defined as 1/3 of the trace of the orthogonalised  $U_{ij}$  tensor.

| Atom | x          | y        | z       | U(eq)   |
|------|------------|----------|---------|---------|
| N1   | 3080.9(18) | 4391(4)  | 4035(3) | 74.0(7) |
| C2   | 2959(2)    | 7455(4)  | 5414(4) | 57.3(7) |
| N2   | 2288(2)    | 10575(4) | 7091(4) | 81.1(9) |

**Table S8 Fractional Atomic Coordinates ( $\times 10^4$ ) and Equivalent Isotropic Displacement Parameters ( $\text{\AA}^2 \times 10^3$ ) for N-11-R-1\_auto.  $U_{eq}$  is defined as 1/3 of the trace of the orthogonalised  $U_{ij}$  tensor.**

| Atom | x          | y       | z       | U(eq)   |
|------|------------|---------|---------|---------|
| C4   | 3875.0(18) | 7503(4) | 4684(3) | 54.8(7) |
| C9   | 3925(2)    | 5542(4) | 3821(4) | 60.5(7) |
| C1   | 2503(2)    | 5527(4) | 4977(4) | 67.4(8) |
| C3   | 2568(2)    | 9155(4) | 6346(4) | 65.2(8) |
| C5   | 4643(2)    | 8990(4) | 4658(3) | 63.6(7) |
| C7   | 5455(2)    | 6557(6) | 2922(4) | 79.2(9) |
| C6   | 5420(2)    | 8498(5) | 3780(4) | 75.9(9) |
| C8   | 4714(2)    | 5041(5) | 2930(4) | 76.2(9) |

**Table S9 Anisotropic Displacement Parameters ( $\text{\AA}^2 \times 10^3$ ) for N-11-R-1\_auto. The Anisotropic displacement factor exponent takes the form:  $-2\pi^2[h^2a^*U_{11}+2hka^*b^*U_{12}+\dots]$ .**

| Atom | $U_{11}$ | $U_{22}$ | $U_{33}$ | $U_{23}$  | $U_{13}$ | $U_{12}$ |
|------|----------|----------|----------|-----------|----------|----------|
| N1   | 88.8(16) | 55.6(11) | 77.6(19) | -18.1(13) | -2.9(16) | -8.2(11) |
| C2   | 66.8(14) | 49.4(12) | 55.8(17) | -5.5(11)  | 0.9(14)  | -0.1(11) |
| N2   | 86.2(18) | 64.7(13) | 92(2)    | -20.6(14) | 19.2(16) | -1.3(12) |
| C4   | 66.5(15) | 46.9(12) | 51.0(16) | -0.8(11)  | -4.2(13) | 5.8(10)  |
| C9   | 72.3(15) | 50.3(12) | 58.8(18) | -5.6(14)  | -4.5(13) | 5.2(11)  |
| C1   | 73.1(16) | 59.7(13) | 69(2)    | -8.6(14)  | 0.8(16)  | -7.6(14) |
| C3   | 67.2(15) | 58.9(13) | 70(2)    | -4.3(16)  | 6.4(15)  | -6.1(14) |
| C5   | 72.4(17) | 52.6(13) | 65.6(19) | -3.7(13)  | -3.3(14) | -2.4(12) |
| C7   | 74.2(19) | 85(2)    | 78(2)    | 1.4(19)   | 11.3(17) | 18.6(17) |
| C6   | 68.7(17) | 77.6(18) | 81(2)    | 4(2)      | 4.4(17)  | -2.6(14) |
| C8   | 95(2)    | 66.8(17) | 67(2)    | -10.5(16) | 1.1(18)  | 20.2(17) |

**Table S10 Bond Lengths for N-11-R-1\_auto.**

| Atom Atom Length/Å |    |          | Atom Atom Length/Å |    |          |
|--------------------|----|----------|--------------------|----|----------|
| N1                 | C9 | 1.377(4) | C4                 | C9 | 1.406(3) |
| N1                 | C1 | 1.348(4) | C4                 | C5 | 1.393(4) |
| C2                 | C4 | 1.433(4) | C9                 | C8 | 1.389(4) |
| C2                 | C1 | 1.375(3) | C5                 | C6 | 1.368(4) |
| C2                 | C3 | 1.422(4) | C7                 | C6 | 1.392(5) |
| N2                 | C3 | 1.148(4) | C7                 | C8 | 1.376(5) |

**Table S11. Bond Angles for N-11-R-1\_auto.**

| Atom Atom Atom Angle/° |    |    |          | Atom Atom Atom Angle/° |    |    |          |
|------------------------|----|----|----------|------------------------|----|----|----------|
| C1                     | N1 | C9 | 110.2(2) | N1                     | C9 | C8 | 130.4(3) |
| C1                     | C2 | C4 | 107.5(2) | C8                     | C9 | C4 | 122.2(3) |
| C1                     | C2 | C3 | 126.1(3) | N1                     | C1 | C2 | 108.9(2) |
| C3                     | C2 | C4 | 126.3(2) | N2                     | C3 | C2 | 177.1(3) |
| C9                     | C4 | C2 | 106.0(2) | C6                     | C5 | C4 | 118.7(3) |
| C5                     | C4 | C2 | 134.8(2) | C8                     | C7 | C6 | 121.5(3) |
| C5                     | C4 | C9 | 119.2(2) | C5                     | C6 | C7 | 121.5(3) |
| N1                     | C9 | C4 | 107.5(2) | C7                     | C8 | C9 | 117.1(3) |

**Table S12. Torsion Angles for N-11-R-1\_auto.**

| A  | B  | C  | D  | Angle/°  | A  | B  | C  | D  | Angle/°   |
|----|----|----|----|----------|----|----|----|----|-----------|
| N1 | C9 | C8 | C7 | 178.7(3) | C1 | N1 | C9 | C8 | -178.6(3) |
| C2 | C4 | C9 | N1 | -0.2(3)  | C1 | C2 | C4 | C9 | -0.1(3)   |
| C2 | C4 | C9 | C8 | 178.9(3) | C1 | C2 | C4 | C5 | 179.1(3)  |

**Table S12. Torsion Angles for N-11-R-1\_auto.**

| A  | B  | C  | D  | Angle/°   | A  | B  | C  | D  | Angle/°   |
|----|----|----|----|-----------|----|----|----|----|-----------|
| C2 | C4 | C5 | C6 | -178.5(3) | C3 | C2 | C4 | C9 | -176.5(3) |
| C4 | C2 | C1 | N1 | 0.3(3)    | C3 | C2 | C4 | C5 | 2.7(5)    |
| C4 | C9 | C8 | C7 | -0.1(5)   | C3 | C2 | C1 | N1 | 176.7(3)  |
| C4 | C5 | C6 | C7 | -0.1(5)   | C5 | C4 | C9 | N1 | -179.5(3) |
| C9 | N1 | C1 | C2 | -0.4(4)   | C5 | C4 | C9 | C8 | -0.5(4)   |
| C9 | C4 | C5 | C6 | 0.6(4)    | C6 | C7 | C8 | C9 | 0.6(5)    |
| C1 | N1 | C9 | C4 | 0.3(3)    | C8 | C7 | C6 | C5 | -0.5(5)   |

**Table S13. Hydrogen Atom Coordinates ( $\text{\AA}\times 10^4$ ) and Isotropic Displacement Parameters ( $\text{\AA}^2\times 10^3$ ) for N-11-R-1\_auto.**

| Atom | x       | y        | z       | U(eq) |
|------|---------|----------|---------|-------|
| H1   | 2942.62 | 3130.71  | 3626.24 | 89    |
| H1A  | 1894.31 | 5079.89  | 5282.06 | 81    |
| H5   | 4628.38 | 10291.16 | 5227.58 | 76    |
| H7   | 5991.85 | 6278.4   | 2330.94 | 95    |
| H6   | 5935.31 | 9482.03  | 3754.36 | 91    |
| H8   | 4740.01 | 3737.35  | 2364.08 | 91    |

## 12. NMR Data of cyanide product 1H-indole-3-carbonitrile<sup>16</sup> (3a)

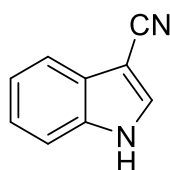

According to the general procedure for cyanation (2.2), compound 3a was prepared from the corresponding 1H-indole-3-carbaldehyde oxime as a white solid in 99% yield.

**<sup>1</sup>H NMR (500 MHz, DMSO-d<sub>6</sub>)** δ 12.14 (s, 1H), 8.20 (s, 1H), 7.60 (d, *J* = 7.8 Hz, 1H), 7.52 (d, *J* = 8.1 Hz, 1H), 7.25 (t, *J* = 7.7 Hz, 1H), 7.20 (t, *J* = 7.4 Hz, 1H). ([see spectra](#))

**<sup>13</sup>C NMR (126 MHz, DMSO-d<sub>6</sub>)** δ 135.7, 134.9, 127.2, 123.8, 122.1, 118.9, 116.8, 113.4, 84.7. ([see spectra](#))

**HRMS(ESI-TOF)** Calcd for C<sub>9</sub>H<sub>7</sub>N<sub>2</sub> [M+H]<sup>+</sup> 143.0604, Found [M+H]<sup>+</sup> 143.0575.

### **5-methoxy-1H-indole-3-carbonitrile<sup>16</sup> (3b)**

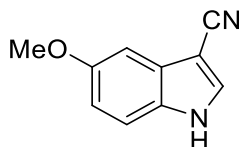

According to the general procedure for cyanation (2.2), compound 3b was prepared from the corresponding 5-methoxy-1H-indole-3-carbaldehyde oxime as an orange solid in 96% yield.

**<sup>1</sup>H NMR (500 MHz, DMSO-d<sub>6</sub>)** δ 12.01 (s, 1H), 8.10 (d, *J* = 3.5 Hz, 1H), 7.40 (d, *J* = 8.5 Hz, 1H), 7.03 (s, 1H), 6.86 (dd, *J* = 9.3, 2.4 Hz, 1H), 3.76 (s, 3H). ([see spectra](#))

**<sup>13</sup>C NMR (126 MHz, DMSO-d<sub>6</sub>)** δ 155.8, 134.8, 130.5, 128.0, 117.1, 114.3, 100.3, 84.4, 55.9. ([see spectra](#))

**HRMS(ESI-TOF)** Calcd for C<sub>10</sub>H<sub>9</sub>N<sub>2</sub>O [M+H]<sup>+</sup> 173.0710, Found [M+H]<sup>+</sup> 173.0710

### **5-methyl-1H-indole-3-carbonitrile<sup>16</sup> (3c)**

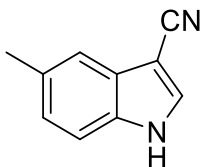

According to the general procedure for cyanation (2.2), compound 3c was prepared from the corresponding 5-methyl-1H-indole-3-carbaldehyde oxime as an off-white solid in 94% yield.

**<sup>1</sup>H NMR (500 MHz, CDCl<sub>3</sub>)** δ 9.00 (s, 1H), 7.68 (d, *J* = 2.6 Hz, 1H), 7.54 (s, 1H), 7.37 (d, *J* = 8.3 Hz, 1H), 7.14 (d, *J* = 8.1 Hz, 1H), 2.47 (s, 3H). ([see spectra](#))

**<sup>13</sup>C NMR (126 MHz, CDCl<sub>3</sub>)** δ 133.3, 132.0, 127.3, 126.0, 119.2, 116.4, 111.9, 86.4, 21.5. ([see spectra](#))

**HRMS(ESI-TOF)** Calcd for C<sub>10</sub>H<sub>9</sub>N<sub>2</sub> [M+H]<sup>+</sup> 157.0761, Found [M+H]<sup>+</sup> 157.0747

### **5-chloro-1H-indole-3-carbonitrile<sup>16</sup> (3d)**

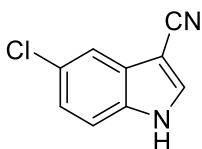

According to the general procedure for cyanation (2.2), compound 3d was prepared from the corresponding 5-chloro-1H-indole-3-carbaldehyde oxime as a white solid in 88% yield.

**<sup>1</sup>H NMR (500 MHz, DMSO-d<sub>6</sub>)** δ 12.33 (s, 1H), 8.25 (d, *J* = 2.6 Hz, 1H), 7.60 (s, 1H), 7.53 (d, *J* = 9.1 Hz, 1H), 7.25 (d, *J* = 10.1 Hz, 1H). ([see spectra](#))

**<sup>13</sup>C NMR (126 MHz, DMSO-d<sub>6</sub>)** δ 136.5, 134.3, 128.3, 127.0, 124.1, 118.1, 116.1, 115.1, 84.6. ([see spectra](#))

**HRMS(ESI-TOF)** Calcd for C<sub>9</sub>H<sub>6</sub>N<sub>2</sub>Cl [M+H]<sup>+</sup> 177.0215, Found [M+H]<sup>+</sup> 177.0210.

### **5-nitro-1H-indole-3-carbonitrile<sup>16</sup> (3e)**

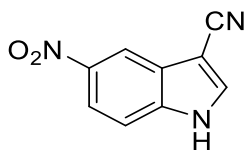

According to the general procedure for cyanation (2.2), compound 3e was prepared from the corresponding 5-nitro-1H-indole-3-carbaldehyde oxime as a yellow solid in 85% yield.

**<sup>1</sup>H NMR (500 MHz, DMSO-d<sub>6</sub>)**  $\delta$  12.70 (s, 1H), 8.40 (d,  $J$  = 2.1 Hz, 1H), 8.36 (s, 1H), 8.02 (d,  $J$  = 9.8 Hz, 1H), 7.62 (d,  $J$  = 9.2 Hz, 1H). ([see spectra](#))

**<sup>13</sup>C NMR (126 MHz, DMSO-d<sub>6</sub>)**  $\delta$  143.0, 138.8 (d,  $J$  = 11.6 Hz), 126.4, 119.0, 115.4 (d,  $J$  = 17.0 Hz), 114.2, 87.3. ([see spectra](#))

**HRMS(ESI-TOF)** Calcd for C<sub>9</sub>H<sub>6</sub>N<sub>3</sub>O<sub>2</sub>[M+H]<sup>+</sup> 188.0455, Found [M+H]<sup>+</sup> 188.0452.

### **1H-indole-3,5-dicarbonitrile<sup>16</sup> (3f)**

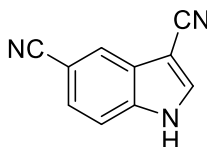

According to the general procedure for cyanation (2.2), compound 3f was prepared from the corresponding 3-((hydroxyimino)methyl)-1H-indole-5-carbonitrile as a yellow solid in 78% yield.

**<sup>1</sup>H NMR (500 MHz, DMSO-d<sub>6</sub>)**  $\delta$  12.65 (s, 1H), 8.42 (s, 1H), 8.14 (s, 1H), 7.68 (d,  $J$  = 8.6 Hz, 1H), 7.60 (d,  $J$  = 8.5 Hz, 1H). ([see spectra](#))

**<sup>13</sup>C NMR (126 MHz, DMSO-d<sub>6</sub>)**  $\delta$  137.9, 137.7, 137.5, 126.8 (d,  $J$  = 12.2 Hz), 124.6 (dd,  $J$  = 22.5, 3.3 Hz), 120.1, 115.7, 114.8, 104.6, 85.9. ([see spectra](#))

**HRMS(ESI-TOF)** Calcd for C<sub>10</sub>H<sub>6</sub>N<sub>3</sub> [M+H]<sup>+</sup> 168.0557, Found [M+H]<sup>+</sup> 168.0557.

### **5-chloro-2-(trifluoromethyl)-1H-indole-3-carbonitrile(3g)**

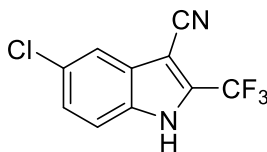

According to the general procedure for cyanation (2.2), compound 3g was prepared from the corresponding 5-chloro-2-(trifluoromethyl)-1H-indole-3-carbaldehyde oxime as a white solid in 61% yield.

**<sup>1</sup>H NMR (500 MHz, CDCl<sub>3</sub>)**  $\delta$  9.45 (s, 1H), 7.81 (s, 1H), 7.47 (d,  $J$  = 8.9 Hz, 1H), 7.42 (d,  $J$  = 9.7 Hz, 1H). ([see spectra](#))

**<sup>13</sup>C NMR (126 MHz, CDCl<sub>3</sub>)**  $\delta$  137.1, 132.7, 130.0, 127.7 (dd,  $J$  = 20.0, 7.5 Hz), 120.5, 120.1, 114.2, 113.5, 111.9, 29.7. ([see spectra](#))

**HRMS(ESI-TOF)** Calcd for C<sub>10</sub>H<sub>5</sub>ClF<sub>3</sub>N<sub>2</sub> [M+H]<sup>+</sup> 245.0088, Found [M+H]<sup>+</sup> 245.0091.

### **2-(4-chlorophenyl)-1H-indole-3-carbonitrile<sup>17</sup>(3h)**

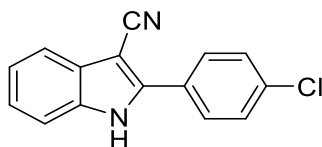

According to the general procedure for cyanation (2.2), compound 3h was prepared from the corresponding 2-(4-chlorophenyl)-1H-indole-3-carbaldehyde oxime as a light-yellow solid in 64% yield.  
**<sup>1</sup>H NMR (500 MHz, CDCl<sub>3</sub>)** δ 8.29 (s, 1H), 7.74 (d, *J* = 8.1 Hz, 2H), 7.60 (d, *J* = 7.8 Hz, 1H), 7.45 (d, *J* = 7.9 Hz, 2H), 7.36 (d, *J* = 8.0 Hz, 1H), 7.27 (d, *J* = 6.9 Hz, 1H), 7.22 (t, *J* = 7.4 Hz, 1H). ([see spectra](#))  
**<sup>13</sup>C NMR (126 MHz, CDCl<sub>3</sub>)** δ 136.8, 135.4, 134.4, 133.1, 129.8, 129.6, 129.0 (d, *J* = 18.6 Hz), 128.7 (d, *J* = 7.8 Hz), 127.3, 123.8, 121.1, 119.6, 111.2, 90.6. ([see spectra](#))  
**HRMS(ESI-TOF)** Calcd for C<sub>15</sub>H<sub>10</sub>N<sub>2</sub>Cl [M+Na]<sup>+</sup> 275.0352 Found [M+Na]<sup>+</sup> 275.0356.

### 1-methyl-1H-indole-3-carbonitrile<sup>16</sup> (3i)

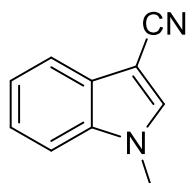

According to the general procedure for cyanation (2.2), compound 3i was prepared from the corresponding 1-methyl-1H-indole-3-carbaldehyde oxime as an off-white solid in 83% yield.  
**<sup>1</sup>H NMR (500 MHz, CDCl<sub>3</sub>)** δ 7.75 (d, *J* = 7.9 Hz, 1H), 7.55 (s, 1H), 7.39 (d, *J* = 8.2 Hz, 1H), 7.35 (t, *J* = 7.5 Hz, 1H), 7.29 (t, *J* = 7.4 Hz, 1H), 3.85 (s, 3H). ([see spectra](#))  
**<sup>13</sup>C NMR (126 MHz, CDCl<sub>3</sub>)** δ 136.1, 135.5, 127.9, 123.9, 122.2, 119.9, 115.9, 110.3, 85.7, 33.6. ([see spectra](#))  
**HRMS(ESI-TOF)** Calcd for C<sub>10</sub>H<sub>9</sub>N<sub>2</sub> [M+H]<sup>+</sup> 157.0761, Found [M+H]<sup>+</sup> 157.0744.

### 1-methyl-2-phenyl-1H-indole-3-carbonitrile<sup>16</sup> (3j)

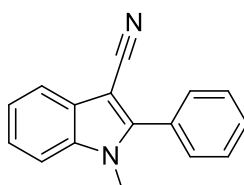

According to the general cyanation procedure 2.2, compound 3j was prepared from the corresponding 1-methyl-2-phenyl-1H-indole-3-carbaldehyde oxime as a white solid in 62% yield.  
**<sup>1</sup>H NMR (500 MHz, CDCl<sub>3</sub>)** δ 7.77 (d, *J* = 7.7 Hz, 1H), 7.54 (dd, *J* = 15.7, 6.6 Hz, 5H), 7.42 (d, *J* = 8.0 Hz, 1H), 7.37 (t, *J* = 7.4 Hz, 1H), 7.32 (t, *J* = 7.3 Hz, 1H), 3.75 (s, 3H). ([see spectra](#))  
**<sup>13</sup>C NMR (126 MHz, CDCl<sub>3</sub>)** δ 148.1, 136.9, 129.9 (d, *J* = 6.0 Hz), 128.9 (d, *J* = 35.8 Hz), 127.6, 123.9 (dd, *J* = 17.8, 8.8 Hz), 122.9 – 122.0 (m), 119.6 (d, *J* = 8.5 Hz), 110.9 – 110.02 (m), 85.6, 31.8. ([see spectra](#))  
**HRMS(ESI-TOF)** Calcd for C<sub>16</sub>H<sub>13</sub>N<sub>2</sub> [M+H]<sup>+</sup> 233.1074, Found [M+H]<sup>+</sup> 233.1074.

### 1-benzyl-1H-indole-3-carbonitrile<sup>18</sup>(3k)

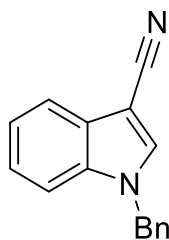

According to the general cyanation procedure 2.2, compound 3k was prepared from the corresponding 1-benzyl-1H-indole-3-carbaldehyde oxime as a yellow oil in 72% yield.

**<sup>1</sup>H NMR (500 MHz, CDCl<sub>3</sub>)** δ 7.77 (d, *J* = 8.0 Hz, 1H), 7.58 (s, 1H), 7.37 – 7.31 (m, 4H), 7.30 (t, 2H), 7.14 (d, *J* = 6.5 Hz, 2H), 5.32 (s, 2H). ([see spectra](#))

**<sup>13</sup>C NMR (126 MHz, CDCl<sub>3</sub>)** δ 135.7, 135.3, 135.1, 129.2, 128.5, 128.0, 127.2, 124.1, 122.4, 120.0, 115.9, 110.9, 86.3, 50.9. ([see spectra](#))

**HRMS(ESI-TOF)** Calcd for C<sub>16</sub>H<sub>13</sub>N<sub>2</sub> [M+H]<sup>+</sup> 233.1074, Found [M+H]<sup>+</sup> 233.1059.

### **1-benzyl-5-chloro-1H-indole-3-carbonitrile<sup>18</sup> (3l)**

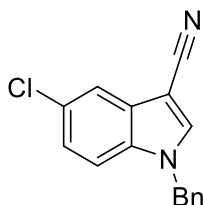

According to the general cyanation procedure 2.2, compound 3l was prepared from the corresponding 1-benzyl-5-chloro-1H-indole-3-carbaldehyde oxime as a brown solid in 70% yield.

**<sup>1</sup>H NMR (500 MHz, CDCl<sub>3</sub>)** δ 7.71 (s, 1H), 7.59 (s, 1H), 7.34 (d, *J* = 7.1 Hz, 3H), 7.25 – 7.21 (m, 2H), 7.12 (d, *J* = 7.7 Hz, 2H), 5.31 (s, 2H). ([see spectra](#))

**<sup>13</sup>C NMR (126 MHz, CDCl<sub>3</sub>)** δ 136.0, 134.8, 134.0, 129.3, 129.0, 128.7, 128.5, 127.1, 124.6, 119.5, 115.1, 112.1, 86.0, 77.4, 77.1, 76.9, 51.2. ([see spectra](#))

**HRMS(ESI-TOF)** Calcd for C<sub>16</sub>H<sub>12</sub>N<sub>2</sub>Cl [M+H]<sup>+</sup> 267.0684, Found [M+H]<sup>+</sup> 267.0686.

### **1-tosyl-1H-indole-3-carbonitrile<sup>19</sup> (3m)**

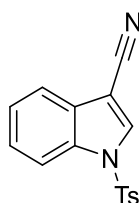

According to the general cyanation procedure 2.2, compound 3m was prepared from the corresponding 1-tosyl-1H-indole-3-carbaldehyde oxime as a white solid in 58% yield.

**<sup>1</sup>H NMR (500 MHz, CDCl<sub>3</sub>)** δ 8.09 (s, 1H), 7.99 (d, *J* = 8.6 Hz, 1H), 7.82 (d, *J* = 7.9 Hz, 2H), 7.68 (d, *J* = 7.8 Hz, 1H), 7.43 (t, *J* = 7.8 Hz, 1H), 7.36 (t, *J* = 7.5 Hz, 1H), 7.29 (d, *J* = 8.2 Hz, 2H), 2.37 (s, 3H). ([see spectra](#))

**<sup>13</sup>C NMR (126 MHz, CDCl<sub>3</sub>)** δ 146.4, 134.2, 133.7, 133.2, 130.4, 128.4, 127.3, 126.6, 124.8, 120.3, 113.8, 113.5, 93.7, 77.2 (d, *J* = 32.0 Hz), 21.7. ([see spectra](#))

**HRMS(ESI-TOF)** Calcd for C<sub>16</sub>H<sub>12</sub>N<sub>2</sub>O<sub>2</sub>SNa [M+Na]<sup>+</sup> 319.0512

Found [M+Na]<sup>+</sup> 319.0522.

### **benzofuran-3-carbonitrile<sup>20</sup> (3n)**

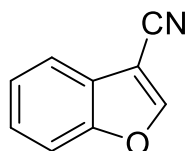

According to the general cyanation procedure 2.2, compound 3n was prepared from the corresponding benzofuran-3-carbaldehyde oxime as a white solid in 96% yield.

**<sup>1</sup>H NMR (500 MHz, CDCl<sub>3</sub>)** δ 8.13 (s, 1H), 7.72 (d, *J* = 7.6 Hz, 1H), 7.57 (d, *J* = 8.2 Hz, 1H), 7.44 (t, *J* = 7.6 Hz, 1H), 7.40 (t, *J* = 7.4 Hz, 1H). ([see spectra](#))

**<sup>13</sup>C NMR (126 MHz, CDCl<sub>3</sub>)** δ 154.5, 152.0, 126.7, 124.8 (d, *J* = 4.4 Hz), 120.3, 112.3 (d, *J* = 8.2 Hz), 95.0. ([see spectra](#))

**HRMS(ESI-TOF)** Calcd for C<sub>9</sub>H<sub>6</sub>NO [M+H]<sup>+</sup> 144.0444, Found [M+H]<sup>+</sup> 144.0445.

### **benzo[b]thiophene-3-carbonitrile<sup>21</sup>(3o)**

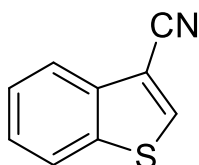

According to the general procedure for cyanation 2.2, compound 3o was prepared from the corresponding benzo[b]thiophene-3-carbaldehyde oxime as a brown solid in 91% yield.

**<sup>1</sup>H NMR (500 MHz, CDCl<sub>3</sub>)** δ 7.75 (d, *J* = 8.5 Hz, 1H), 7.73 (s, 1H), 7.72 (s, 1H), 7.41 (t, *J* = 7.5 Hz, 1H), 7.35 (t, *J* = 7.5 Hz, 1H). ([see spectra](#))

**<sup>13</sup>C NMR (126 MHz, CDCl<sub>3</sub>)** δ 140.0, 136.2, 133.7, 126.6, 124.5, 124.0, 121.1, 113.2, 108.4. ([see spectra](#))

**HRMS(ESI-TOF)** Calcd for C<sub>9</sub>H<sub>6</sub>NS [M+H]<sup>+</sup> 160.0216, Found [M+H]<sup>+</sup> 160.0209.

### **5-bromobenzo[b]thiophene-3-carbonitrile(3p)**

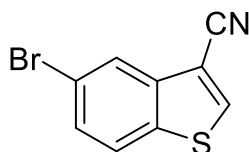

According to the general procedure for cyanation 2.2, compound 3p was prepared from the corresponding 5-bromobenzo[b]thiophene-3-carbaldehyde oxime as a brown solid in 87% yield.

**<sup>1</sup>H NMR (500 MHz, CDCl<sub>3</sub>)** δ 8.13 (s, 2H), 7.76 (d, *J* = 9.0 Hz, 1H), 7.58 (d, *J* = 7.5 Hz, 1H). ([see spectra](#))

**<sup>13</sup>C NMR (126 MHz, CDCl<sub>3</sub>)** δ 138.9 (d, *J* = 8.1 Hz), 137.1, 129.6, 125.4, 124.1, 120.5, 113.7, 106.6. ([see spectra](#))

**HRMS(ESI-TOF)** Calcd for C<sub>9</sub>H<sub>5</sub>BrNS [M+H]<sup>+</sup> 160.0216, Found [M+H]<sup>+</sup> 160.0209.

### **1H-pyrrolo[2,3-b]pyridine-3-carbonitrile<sup>22</sup>(3q)**

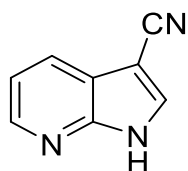

According to the general procedure for cyanation 2.2, compound 3q was prepared from the corresponding 1H-pyrrolo[2,3-b]pyridine-3-carbaldehyde oxime as a white solid in 89% yield.

**<sup>1</sup>H NMR (500 MHz, DMSO-*d*<sub>6</sub>)** δ 12.77 (s, 1H), 8.37 (s, 1H), 8.34 (d, *J* = 4.3 Hz, 1H), 8.04 (d, *J* = 7.9 Hz, 1H), 7.21 (dd, *J* = 7.7, 4.8 Hz, 1H). ([see spectra](#))

**<sup>13</sup>C NMR (126 MHz, DMSO-*d*<sub>6</sub>)** δ 147.9, 145.5, 135.9, 127.7, 119.4, 118.3, 116.0, 83.8. ([see spectra](#))

**HRMS(ESI-TOF)** Calcd for C<sub>8</sub>H<sub>5</sub>N<sub>3</sub> [M+H]<sup>+</sup> 144.0557, Found [M+H]<sup>+</sup> 144.0547.

### **1-benzyl-1H-pyrrolo[2,3-b]pyridine-3-carbonitrile<sup>22</sup>(3r)**

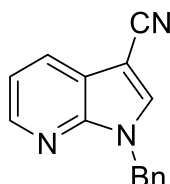

According to the general procedure for cyanation 2.2, compound 3r was prepared from the corresponding 1-benzyl-1H-pyrrolo[2,3-b]pyridine-3-carbaldehyde oxime as a white solid in 67% yield.

**<sup>1</sup>H NMR (500 MHz, CDCl<sub>3</sub>)** δ 8.47 (d, *J* = 5.7 Hz, 1H), 8.06 (d, *J* = 7.9 Hz, 1H), 7.67 (s, 1H), 7.36 – 7.30 (m, 3H), 7.26 (dt, *J* = 7.7, 3.8 Hz, 3H), 5.50 (s, 2H). ([see spectra](#))

**<sup>13</sup>C NMR (126 MHz, CDCl<sub>3</sub>)** δ 146.7, 145.5, 135.8, 134.9, 129.1, 128.4 (d, *J* = 16.2 Hz), 128.0, 120.0, 118.4, 115.0, 85.0, 48.7. ([see spectra](#))

**HRMS(ESI-TOF)** Calcd for C<sub>15</sub>H<sub>11</sub>N<sub>3</sub> [M+H]<sup>+</sup> 234.1026, Found [M+H]<sup>+</sup> 234.1008.

## **13. NMR Data of Successful Oximes**

### **5-methoxy-1H-indole-3-carbaldehyde oxime(1b)**

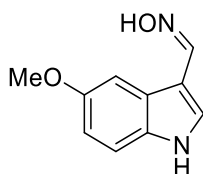

**<sup>1</sup>H NMR (500 MHz, DMSO)** δ 11.22 (s, 1H), 10.46 (s, 1H), 8.22 (s, 1H), 7.53 (d, *J* = 2.3 Hz, 1H), 7.43 (d, *J* = 2.3 Hz, 1H), 7.28 (d, *J* = 9.1 Hz, 1H), 6.77 (d, *J* = 5.8 Hz, 1H), 3.71 (s, 3H). ([see spectra](#))

**<sup>13</sup>C NMR (126 MHz, DMSO)** δ 154.6, 145.4, 132.3, 129.4, 125.1, 113.0, 109.8, 103.6, 55.8. ([see spectra](#))

### **5-methyl-1H-indole-3-carbaldehyde oxime(1c)**

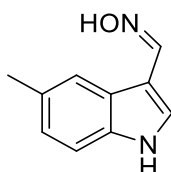

**<sup>1</sup>H NMR (500 MHz, DMSO)** δ 11.41 (s, 1H), 11.10 (s, 1H), 8.15 (d, *J* = 2.3 Hz, 1H), 7.70 (s, 1H), 7.59 (s, 1H), 7.29 (d, *J* = 8.2 Hz, 1H), 6.95 (d, *J* = 8.2 Hz, 1H), 2.37 (s, 3H). ([see spectra](#))  
**<sup>13</sup>C NMR (126 MHz, DMSO)** δ 138.9, 133.8, 131.0, 129.1, 127.0, 123.9, 118.2, 111.9, 106.4, 21.8. ([see spectra](#))

**5-chloro-1H-indole-3-carbaldehyde oxime(1d)**

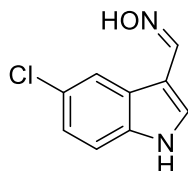

**<sup>1</sup>H NMR (500 MHz, DMSO)** δ 11.67 (s, 1H), 11.19 (s, 1H), 8.22 (d, *J* = 2.4 Hz, 1H), 7.90 (s, 1H), 7.73 (s, 1H), 7.41 (d, *J* = 9.0 Hz, 1H), 7.11 (d, *J* = 7.2 Hz, 1H). ([see spectra](#))  
**<sup>13</sup>C NMR (126 MHz, DMSO)** δ 138.5, 133.9, 132.4, 127.8, 125.2, 122.3, 118.3, 113.8, 106.8. ([see spectra](#))

**5-nitro-1H-indole-3-carbaldehyde oxime(1e)**

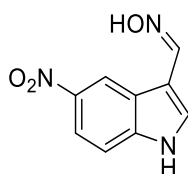

**<sup>1</sup>H NMR (500 MHz, DMSO)** δ 12.02 (s, 1H), 10.88 (s, 1H), 8.92 (s, 2H), 8.29 (s, 1H), 8.03 (d, *J* = 9.1 Hz, 2H), 7.88 (d, *J* = 44.3 Hz, 2H), 7.60 – 7.55 (m, 2H). ([see spectra](#))  
**<sup>13</sup>C NMR (126 MHz, DMSO)** δ 149.0, 146.7 (d, *J* = 8.4 Hz), 145.3, 143.4, 142.9, 139.1, 136.9, 130.7, 128.7, 123.7, 123.0, 122.5, 121.4, 117.6, 117.1, 114.0. ([see spectra](#))

**3-((hydroxyimino)methyl)-1H-indole-5-carbonitrile(1f)**

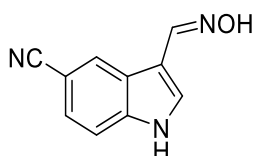

**<sup>1</sup>H NMR (500 MHz, DMSO)** δ 12.04 (s, 1H), 11.41 (s, 1H), 8.46 (s, 1H), 8.37 (s, 1H), 7.86 (s, 1H), 7.58 (d, *J* = 8.4 Hz, 1H), 7.48 (d, *J* = 9.2 Hz, 1H). ([see spectra](#))  
**<sup>13</sup>C NMR (126 MHz, DMSO)** δ 138.2, 137.2, 133.2, 126.5, 125.1, 124.9, 121.0, 113.6, 107.7, 102.6. ([see spectra](#))

**2-(4-chlorophenyl)-1H-indole-3-carbaldehyde oxime(1h)**

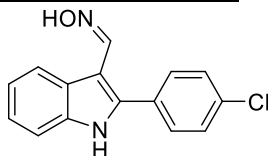

**<sup>1</sup>H NMR (500 MHz, DMSO)** δ 11.25 (s, 5H), 7.78 (d, *J* = 8.2 Hz, 4H), 7.64 (d, *J* = 8.0 Hz, 4H), 7.32 (d, *J* = 8.1 Hz, 7H), 7.11 (q, *J* = 8.6 Hz, 24H), 6.97 (t, *J* = 7.4 Hz, 6H), 6.90 (d, *J* = 8.1 Hz, 5H), 6.60 (t, *J* = 7.5 Hz, 5H). ([see spectra](#))

<sup>13</sup>C NMR (126 MHz, DMSO) δ 147.9, 136.6, 134.2, 132.1 (d, *J* = 19.8 Hz), 130.0, 129.5, 129.1, 128.3, 124.4, 123.0, 121.6 (d, *J* = 9.7 Hz), 121.1, 119.2, 116.7, 112.6, 111.8. ([see spectra](#))

**1-methyl-1H-indole-3-carbaldehyde oxime(1i)**

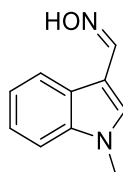

<sup>1</sup>H NMR (500 MHz, CDCl<sub>3</sub>) δ 8.35 (s, 1H), 8.27 (s, 1H), 7.80 (s, 1H), 7.76 (d, *J* = 7.8 Hz, 1H), 7.36 (d, *J* = 8.1 Hz, 1H), 7.31 (t, 1H), 7.25 (t, 1H), 3.82 (s, 3H). ([see spectra](#))

<sup>13</sup>C NMR (126 MHz, CDCl<sub>3</sub>) δ 136.1, 135.5, 127.9, 123.9, 122.2, 119.9, 115.9, 110.3, 85.7, 33.6. ([see spectra](#))

**1-methyl-2-phenyl-1H-indole-3-carbaldehyde oxime(1j)**

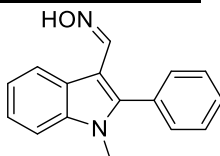

<sup>1</sup>H NMR (500 MHz, DMSO) δ 10.65 (s, 1H), 8.09 (d, *J* = 7.9 Hz, 1H), 7.90 (s, 1H), 7.56 – 7.48 (m, 4H), 7.45 (d, *J* = 7.3 Hz, 2H), 7.26 (t, *J* = 7.5 Hz, 1H), 7.17 (t, *J* = 7.5 Hz, 1H), 3.57 (s, 3H). ([see spectra](#))

<sup>13</sup>C NMR (126 MHz, DMSO) δ 144.8, 142.7, 137.8, 131.1, 130.1, 129.5, 129.1, 124.7, 123.3, 122.3, 121.3, 110.8, 107.4, 31.3. ([see spectra](#))

**1-benzyl-1H-indole-3-carbaldehyde oxime(1k)**

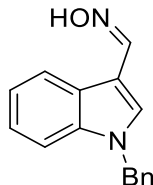

<sup>1</sup>H NMR (500 MHz, DMSO) δ 11.26 (s, 1H), 8.36 (s, 1H), 7.85 (d, *J* = 7.8 Hz, 1H), 7.77 (s, 1H), 7.46 (d, *J* = 8.0 Hz, 1H), 7.29 – 7.25 (m, 2H), 7.21 (d, *J* = 6.7 Hz, 1H), 7.18 (d, *J* = 7.5 Hz, 2H), 7.14 (t, *J* = 7.5 Hz, 1H), 7.10 (t, *J* = 7.4 Hz, 1H), 5.46 (s, 2H). ([see spectra](#))

<sup>13</sup>C NMR (126 MHz, DMSO) δ 138.5, 138.1, 135.3, 134.3, 129.1, 128.0, 127.6, 127.4, 122.6, 120.8, 119.0, 111.1, 106.4, 49.7. ([see spectra](#))

**1-benzyl-5-chloro-1H-indole-3-carbaldehyde oxime(1l)**

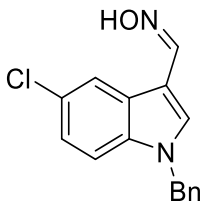

<sup>1</sup>H NMR (500 MHz, CDCl<sub>3</sub>) δ 8.33 (d, *J* = 45.6 Hz, 1H), 7.74 (s, 1H), 7.29 (d, *J* = 7.4 Hz, 3H), 7.17 (s, 2H), 7.11 (d, *J* = 7.5 Hz, 2H), 5.28 (d, *J* = 31.5 Hz, 2H). ([see spectra](#))

<sup>13</sup>C NMR (126 MHz, CDCl<sub>3</sub>) δ 145.3, 138.9, 136.1 (d, *J* = 9.6 Hz), 135.7, 133.9, 131.8, 129.07 (d, *J* = 2.3 Hz), 128.5 (d, *J* = 16.6 Hz), 128.2, 128.2 (d, *J* = 6.3 Hz), 127.8 (d, *J* = 20.1 Hz), 127.1 (d, *J* = 2.6

Hz), 126.8 (d,  $J = 13.1$  Hz), 126.4, 123.6, 123.2, 121.8, 118.1, 111.5, 111.1, 109.1, 105.6, 50.9, 50.6. ([see spectra](#))

#### **1-tosyl-1Hindole-3-carbaldehyde oxime(1n)**

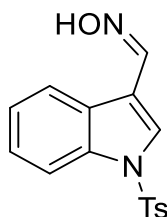

**<sup>1</sup>H NMR (500 MHz, DMSO)**  $\delta$  11.21 (s, 2H), 8.29 (s, 2H), 8.10 (s, 2H), 8.01 (d,  $J = 7.9$  Hz, 2H), 7.92 (t,  $J = 7.3$  Hz, 4H), 7.86 (d,  $J = 15.0$  Hz, 2H), 7.82 (d,  $J = 8.1$  Hz, 5H), 7.36 (t,  $J = 7.4$  Hz, 3H), 7.30 (d,  $J = 8.6$  Hz, 7H), 7.27 (d,  $J = 7.7$  Hz, 2H), 2.22 (s, 9H). ([see spectra](#))

**<sup>13</sup>C NMR (126 MHz, DMSO)**  $\delta$  146.5, 146.2, 143.6, 136.9, 135.2, 134.2, 133.4, 130.8 (d,  $J = 12.6$  Hz), 130.0, 129.1, 128.9, 127.5, 127.3, 126.1, 125.9, 124.6, 124.3, 123.3, 120.3, 117.0, 113.6 (d,  $J = 15.7$  Hz), 112.1, 21.5. ([see spectra](#))

#### **benzofuran-3-carbaldehyde oxime(1o)**

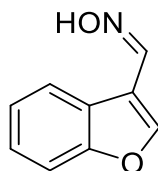

**<sup>1</sup>H NMR (500 MHz, DMSO)**  $\delta$  12.44 (s, 1H), 11.65 (s, 1H), 9.14 (s, 1H), 8.71 (s, 1H), 8.64 (s, 1H), 8.39 (d,  $J = 7.7$  Hz, 1H), 8.34 (d,  $J = 7.5$  Hz, 1H), 8.26 (s, 1H), 8.02 – 7.96 (m, 2H), 7.75 (t,  $J = 7.7$  Hz, 2H), 7.71 (dd,  $J = 8.3, 6.2$  Hz, 2H). ([see spectra](#))

**<sup>13</sup>C NMR (126 MHz, DMSO)**  $\delta$  155.9, 154.3, 150.1, 148.0, 142.5, 136.9, 126.3, 126.0, 125.0, 124.5, 124.3, 123.5, 120.8, 116.6, 112.4 (d,  $J = 5.3$  Hz), 112.1. ([see spectra](#))

#### **benzo[b]thiophene-3-carbaldehyde oxime(1p)**

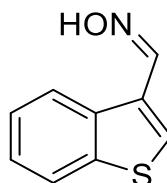

**<sup>1</sup>H NMR (500 MHz, DMSO)**  $\delta$  12.10 (s, 2H), 11.51 (s, 4H), 8.41 (s, 4H), 7.95 – 7.92 (m, 5H), 7.89 – 7.85 (m, 7H), 7.80 – 7.77 (m, 4H), 7.74 (s, 3H), 7.57 (s, 4H), 7.39 – 7.36 (m, 5H), 7.34 – 7.31 (m, 8H). ([see spectra](#))

**<sup>13</sup>C NMR (126 MHz, DMSO)**  $\delta$  144.5, 142.1, 140.9, 139.6, 139.1, 137.9, 137.5, 131.8, 128.2, 126.7, 126.2, 125.2 (d,  $J = 15.1$  Hz), 124.8, 124.5, 122.9, 122.8. ([see spectra](#))

#### **5-bromobenzo[b]thiophene-3-carbaldehyde oxime(1q)**

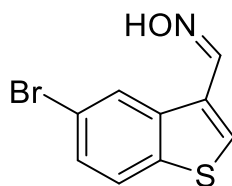

**<sup>1</sup>H NMR (500 MHz, DMSO)** δ 11.33 (s, 1H), 8.68 (s, 1H), 8.39 (s, 1H), 8.07 (s, 1H), 7.97 (d, *J* = 8.3 Hz, 1H), 7.54 (d, *J* = 10.0 Hz, 1H). ([see spectra](#))

**<sup>13</sup>C NMR (126 MHz, DMSO)** δ 145.3, 139.5, 137.8, 133.1, 129.1, 128.2, 127.6, 125.4, 118.9. ([see spectra](#))

#### **1H-pyrrolo[2,3-b]pyridine-3-carbaldehyde oxime(1r)**

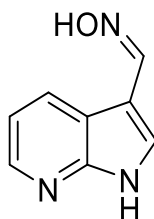

**<sup>1</sup>H NMR (600 MHz, DMSO)** δ 12.14 (s, 1H), 11.96 (s, 1H), 11.39 (s, 1H), 10.72 (s, 1H), 8.36 (d, *J* = 7.9 Hz, 1H), 8.31 (d, *J* = 14.4 Hz, 5H), 7.81 (d, *J* = 14.7 Hz, 2H), 7.20 (dd, *J* = 12.2, 7.0 Hz, 2H). ([see spectra](#))

**<sup>13</sup>C NMR (126 MHz, DMSO)** δ 149.6, 148.0, 144.8, 144.2, 143.9, 138.5, 131.2, 130.0, 129.0, 127.8, 118.7, 117.0, 116.8, 109.0, 106.0. ([see spectra](#))

#### **1H-pyrrolo[2,3-b]pyridine-3-carbaldehyde oxime(1s)**

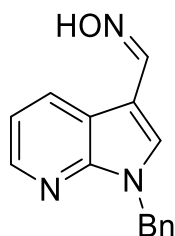

**<sup>1</sup>H NMR (500 MHz, CDCl<sub>3</sub>)** δ 8.42 (dd, *J* = 8.6, 4.5 Hz, 2H), 8.32 (d, *J* = 7.2 Hz, 2H), 8.25 (s, 1H), 8.10 (d, *J* = 7.2 Hz, 1H), 7.69 (s, 1H), 7.33 (s, 1H), 7.31 – 7.19 (m, 11H), 7.16 (dd, *J* = 7.8, 5.1 Hz, 1H), 5.51 (d, *J* = 25.8 Hz, 4H). ([see spectra](#))

**<sup>13</sup>C NMR (126 MHz, CDCl<sub>3</sub>)** δ 176.1, 148.3, 146.9, 145.3, 144.3, 144.0, 138.5, 136.9 (d, *J* = 4.5 Hz), 134.3, 130.7, 130.1, 128.9 (d, *J* = 4.0 Hz), 128.0 (d, *J* = 7.3 Hz), 127.7 (d, *J* = 11.7 Hz), 127.3, 119.4, 117.7, 117.3 (d, *J* = 19.9 Hz), 108.2, 104.7, 48.4, 48.1, 20.8. ([see spectra](#))

### **13. NMR Data of Aldehyde**

#### **5-methoxy-1H-indole-3-carbaldehyde(1b')**

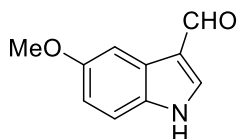

**<sup>1</sup>H NMR (500 MHz, DMSO-d<sub>6</sub>)** δ 11.98 (s, 1H), 9.86 (s, 1H), 8.17 (s, 1H), 7.55 (s, 1H), 7.37 (d, *J* = 8.8 Hz, 1H), 6.85 (d, *J* = 8.0 Hz, 1H). ([see spectra](#))

**<sup>13</sup>C NMR (126 MHz, DMSO-d<sub>6</sub>)** δ 185.3, 156.1, 138.8, 132.3, 125.4, 118.5, 113.8, 103.0, 55.8. ([see spectra](#))

#### **5-methyl-1H-indole-3-carbaldehyde(1c')**

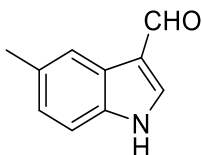

**<sup>1</sup>H NMR (500 MHz, CDCl<sub>3</sub>+DMSO-d<sub>6</sub>)** δ 11.45 (s, 1H), 9.85 (s, 1H), 7.93 (s, 1H), 7.74 (s, 1H), 7.25 (d, *J* = 8.2 Hz, 1H), 6.99 (d, *J* = 8.1 Hz, 1H), 2.36 (s, 3H). ([see spectra](#))

**<sup>13</sup>C NMR (126 MHz, CDCl<sub>3</sub>+DMSO-d<sub>6</sub>)** δ 185.0, 162.5, 137.1, 135.7, 131.9 (d, *J* = 10.9 Hz), 125.3, 124.8, 121.2, 118.5, 111.9, 21.5. ([see spectra](#))

#### **5-chloro-1H-indole-3-carbaldehyde(1d')**

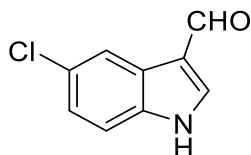

**<sup>1</sup>H NMR (500 MHz, CDCl<sub>3</sub>)** δ 12.26 (s, 1H), 9.88 (s, 1H), 8.30 (s, 1H), 8.03 (s, 1H), 7.49 (d, *J* = 8.9 Hz, 1H), 7.23 (d, *J* = 8.5 Hz, 1H). ([see spectra](#))

**<sup>13</sup>C NMR (126 MHz, CDCl<sub>3</sub>)** δ 128.1, 124.8, 122.2, 120.4, 120.0 (d, *J* = 16.8 Hz), 118.3, 111.6, 110.3. ([see spectra](#))

#### **5-nitro-1H-indole-3-carbaldehyde(1e')**

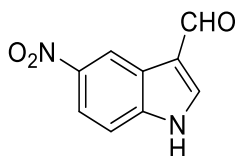

**<sup>1</sup>H NMR (500 MHz, DMSO-d<sub>6</sub>)** δ 12.63 (s, 1H), 9.97 (s, 1H), 8.87 (d, *J* = 2.3 Hz, 1H), 8.50 (s, 1H), 8.09 (d, *J* = 9.5 Hz, 1H), 7.65 (d, *J* = 8.9 Hz, 1H). ([see spectra](#))

**<sup>13</sup>C NMR (126 MHz, DMSO-d<sub>6</sub>)** δ 186.0, 143.4, 141.8, 140.6, 124.0, 119.6, 119.3, 117.5, 113.7. ([see spectra](#))

#### **2-(4-chlorophenyl)-1H-indole-3-carbaldehyde(1h')**

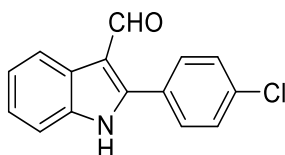

**<sup>1</sup>H NMR (500 MHz, DMSO-d<sub>6</sub>)** δ 12.43 (s, 1H), 9.94 (s, 1H), 8.20 (d, *J* = 7.7 Hz, 1H), 7.77 (d, *J* = 8.3 Hz, 2H), 7.62 (d, *J* = 8.5 Hz, 2H), 7.49 (d, *J* = 8.0 Hz, 1H), 7.26 (t, *J* = 7.4 Hz, 1H), 7.22 (t, *J* = 7.4 Hz, 1H). ([see spectra](#))

**<sup>13</sup>C NMR (126 MHz, DMSO-d<sub>6</sub>)** δ 185.9, 147.9, 136.4, 135.3, 132.0, 129.5, 129.1, 126.3, 124.3, 123.0, 121.6, 114.2, 112.5. ([see spectra](#))

**1-methyl-1H-indole-3-carbaldehyde(1i')**

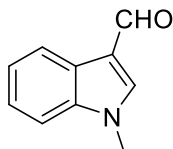

**<sup>1</sup>H NMR (500 MHz, CDCl<sub>3</sub>)** δ 8.25 (s, 1H), 7.83 (s, 1H), 7.78 (d, *J* = 7.9 Hz, 1H), 7.36 (d, *J* = 8.2 Hz, 1H), 7.30 (t, *J* = 7.6 Hz, 1H), 7.26 – 7.24 (m, 1H), 3.83 (s, 3H). ([see spectra](#))

**1-methyl-2-phenyl-1H-indole-3-carbaldehyde(1j')**

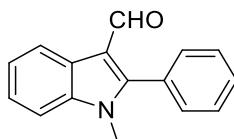

**<sup>1</sup>H NMR (500 MHz, CDCl<sub>3</sub>)** δ 9.73 (s, 1H), 8.43 (d, *J* = 8.3 Hz, 1H), 7.57 – 7.53 (m, 3H), 7.48 (dd, *J* = 5.9, 2.8 Hz, 2H), 7.37 (tt, *J* = 6.7, 4.8 Hz, 3H), 3.66 (s, 3H). ([see spectra](#))

**<sup>13</sup>C NMR (126 MHz, CDCl<sub>3</sub>)** δ 186.6, 151.4, 137.4, 130.9, 129.9, 128.8, 125.2, 124.1, 123.3, 122.3, 115.8, 109.8, 31.0. ([see spectra](#))

**1-benzyl-1H-indole-3-carbaldehyde(1k')**

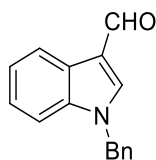

**<sup>1</sup>H NMR (500 MHz, CDCl<sub>3</sub>)** δ 9.91 (s, 1H), 8.30 (s, 1H), 7.69 (s, 1H), 7.37 – 7.30 (m, 3H), 7.20 (s, 2H), 7.15 (d, *J* = 7.7 Hz, 2H), 5.31 (s, 2H). ([see spectra](#))

**<sup>13</sup>C NMR (126 MHz, CDCl<sub>3</sub>)** δ 184.4, 139.3, 135.8, 134.9, 129.2 (d, *J* = 17.9 Hz), 128.5 (d, *J* = 19.9 Hz), 127.8 (d, *J* = 18.5 Hz), 127.2, 126.5, 124.6, 121.8, 117.9, 111.5, 51.2. ([see spectra](#))

**1-benzyl-5-chloro-1H-indole-3-carbaldehyde(1l')**

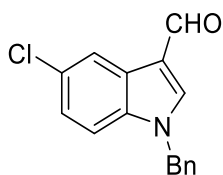

**<sup>1</sup>H NMR (500 MHz, CDCl<sub>3</sub>)** δ 9.91 (s, 1H), 8.30 (s, 1H), 7.69 (s, 1H), 7.37 – 7.30 (m, 3H), 7.20 (s, 2H), 7.15 (d, *J* = 7.7 Hz, 2H), 5.31 (s, 2H). ([see spectra](#))

**<sup>13</sup>C NMR (126 MHz, CDCl<sub>3</sub>)** δ 184.4, 139.4, 135.8, 134.9, 129.2 (d, *J* = 17.9 Hz), 128.5 (d, *J* = 19.9 Hz), 127.8 (d, *J* = 18.5 Hz), 127.2, 126.5, 124.6, 121.8, 117.9, 111.5, 51.2. ([see spectra](#))

**1-tosyl-1H-indole-3-carbaldehyde(1m')**

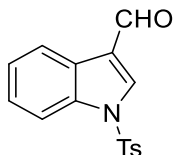

**<sup>1</sup>H NMR (500 MHz, CDCl<sub>3</sub>)** δ 10.07 (s, 1H), 8.26 – 8.21 (m, 2H), 7.94 (d, *J* = 8.2 Hz, 1H), 7.83 (d, *J* = 8.7 Hz, 2H), 7.38 (t, *J* = 7.7 Hz, 1H), 7.33 (t, *J* = 7.6 Hz, 1H), 7.26 (s, 1H), 7.24 (s, 1H), 2.32 (s, 3H). ([see spectra](#))

**<sup>13</sup>C NMR (126 MHz, CDCl<sub>3</sub>)** δ 185.5, 146.2, 136.4, 135.2, 134.3, 130.4, 127.3, 126.3, 125.1, 122.6, 122.4, 113.3, 21.7. ([see spectra](#))

**14. NMR and HRMS Spectra of cyanide products**

**1H-indole-3-carbonitrile(3a)**

**<sup>1</sup>H NMR (500 MHz, DMSO-d<sub>6</sub>)**

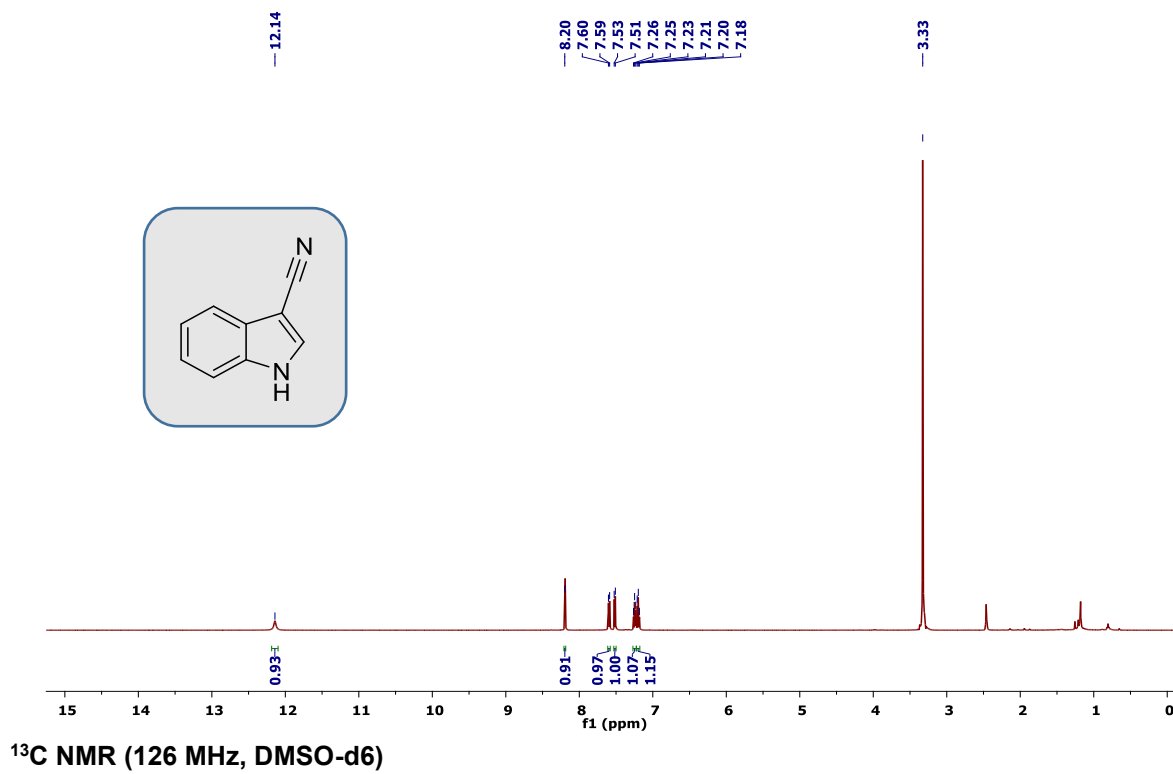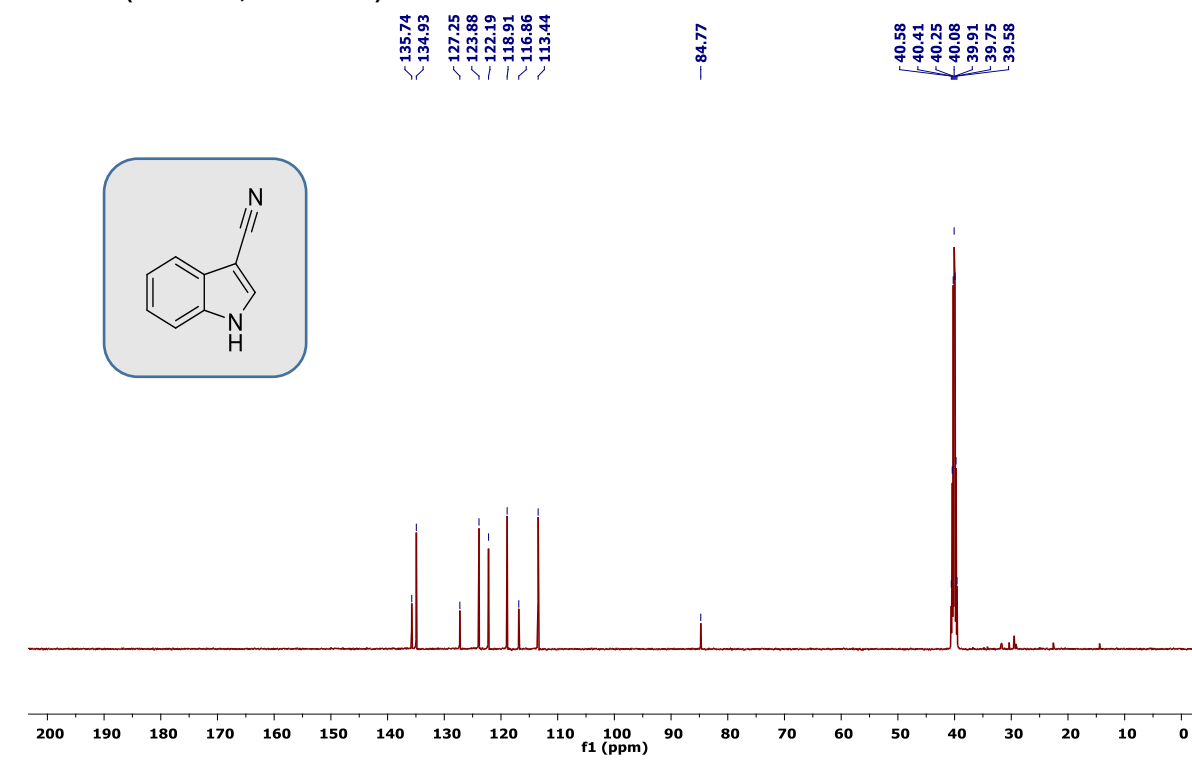

## HRMS-Spectra

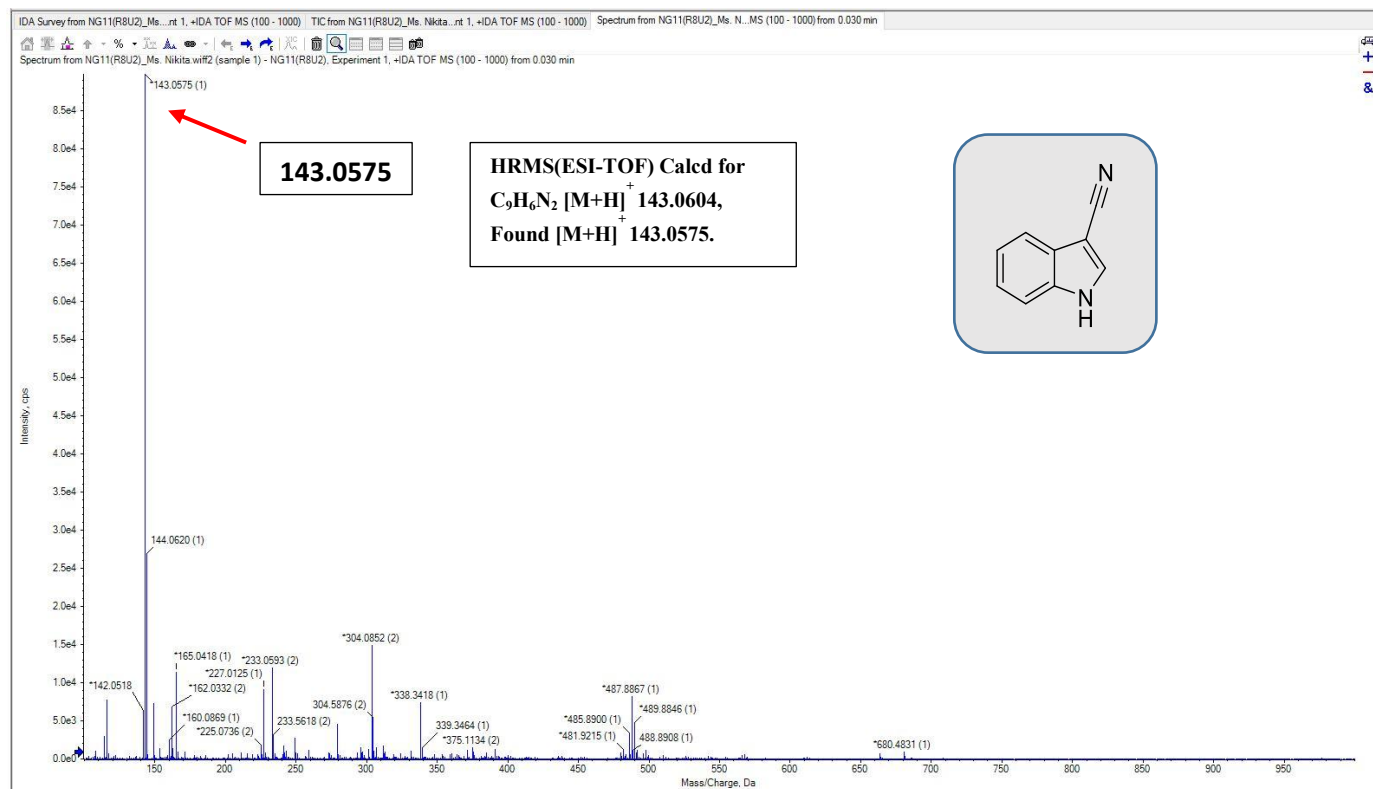

### 5-methoxy-1H-indole-3-carbonitrile(3b)

$^1H$  NMR (500 MHz, DMSO-d6)

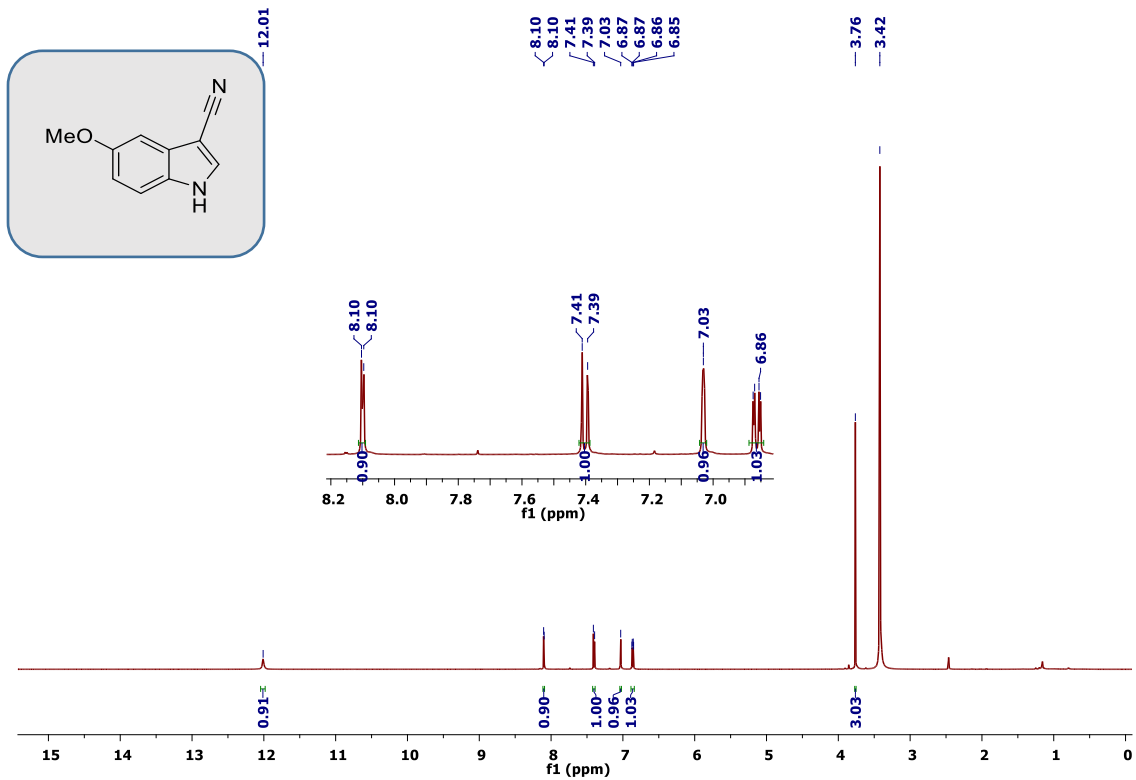

**<sup>13</sup>C NMR (126 MHz, DMSO-d<sub>6</sub>)**

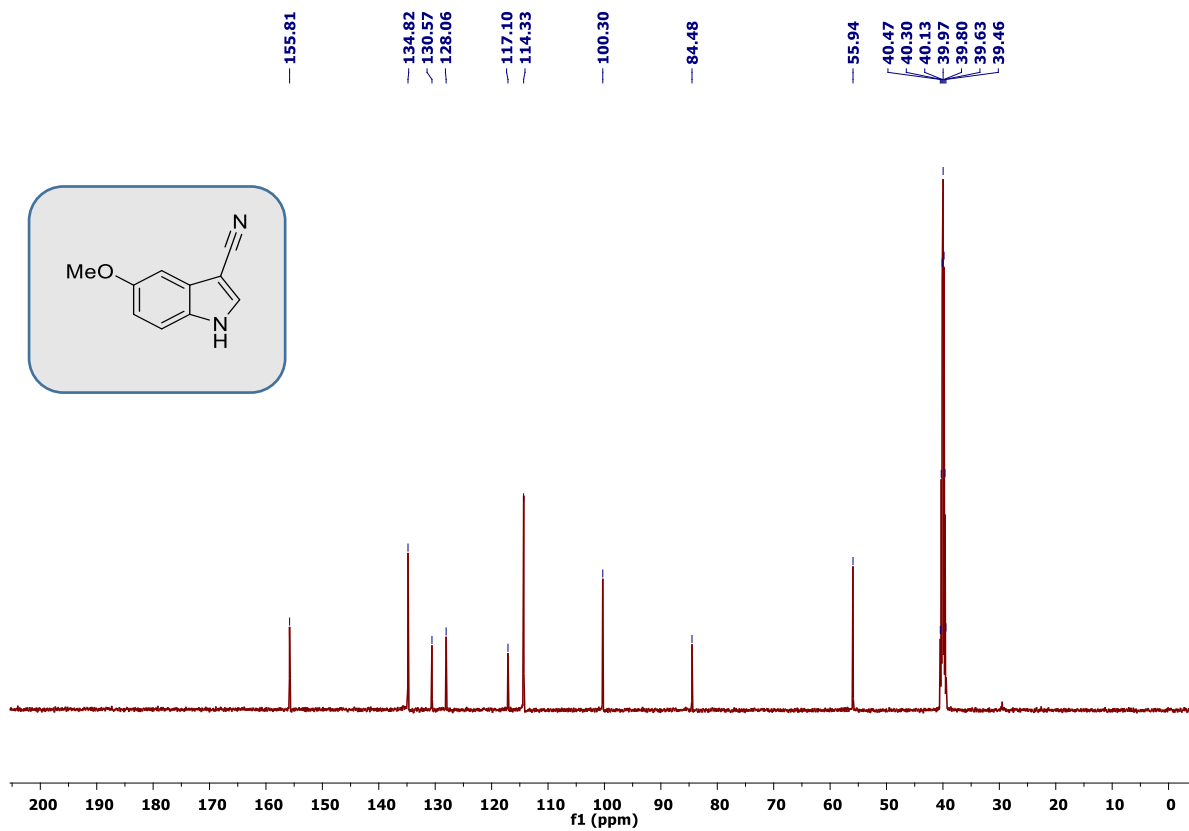

**HRMS-Spectra**

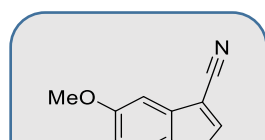

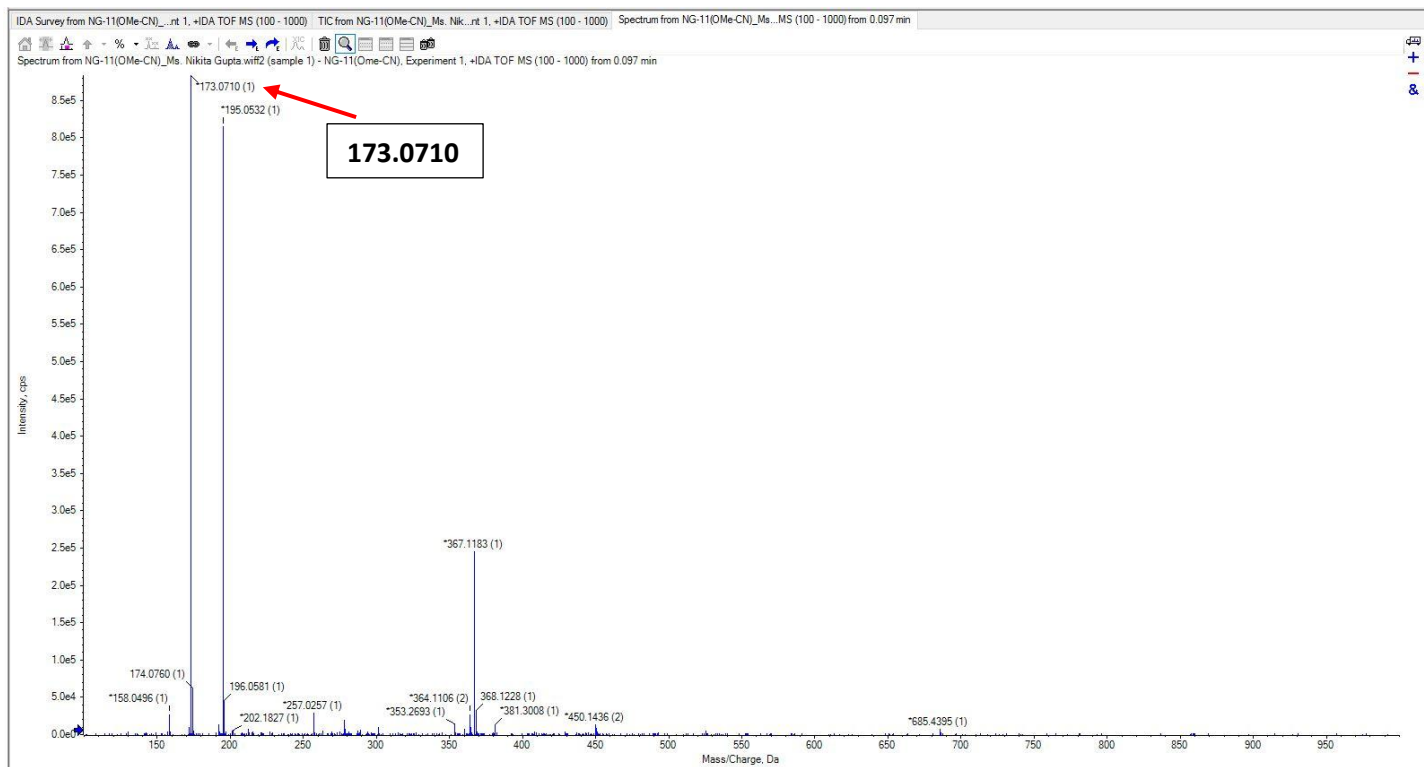

**5-methyl-1H-indole-3-carbonitrile(3c)**

**<sup>1</sup>H NMR (500 MHz, CDCl<sub>3</sub>)**

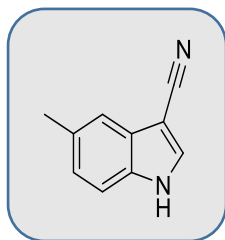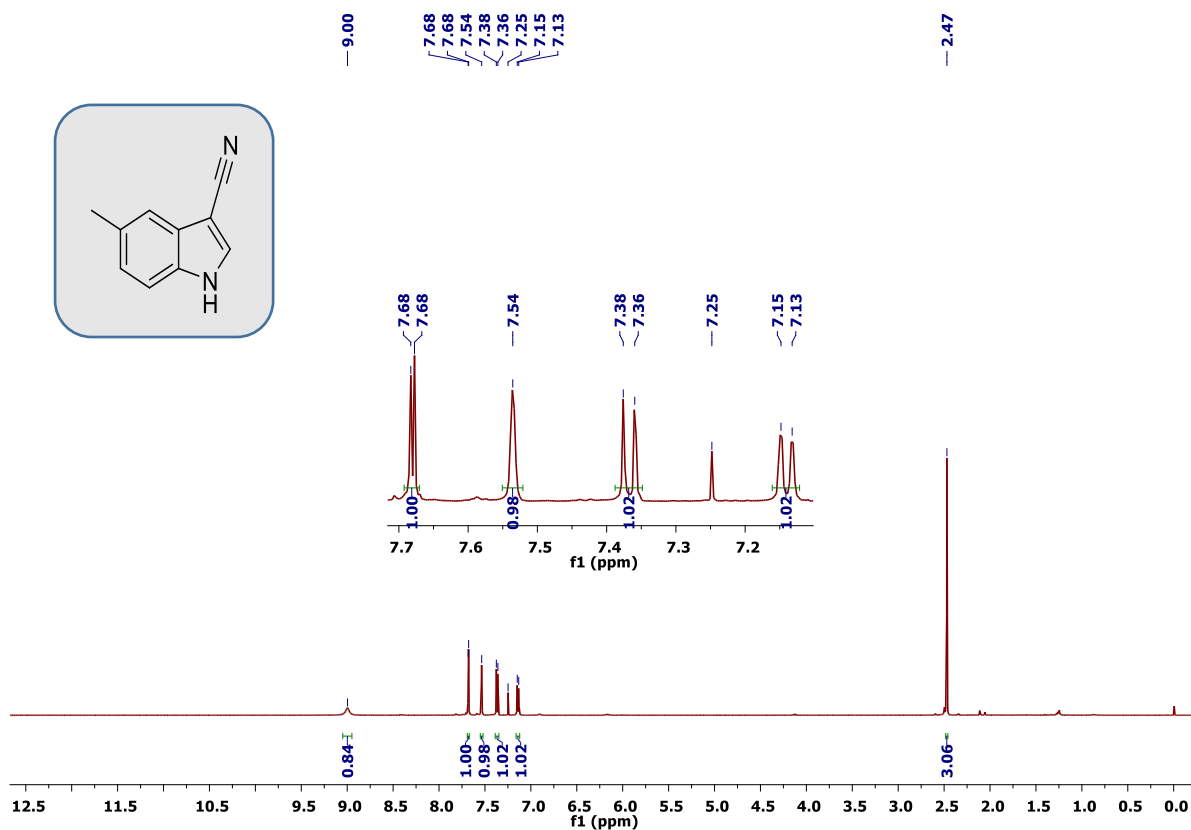

<sup>13</sup>C NMR (126 MHz, CDCl<sub>3</sub>)

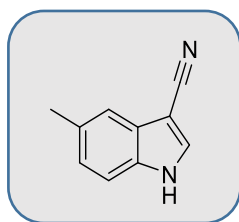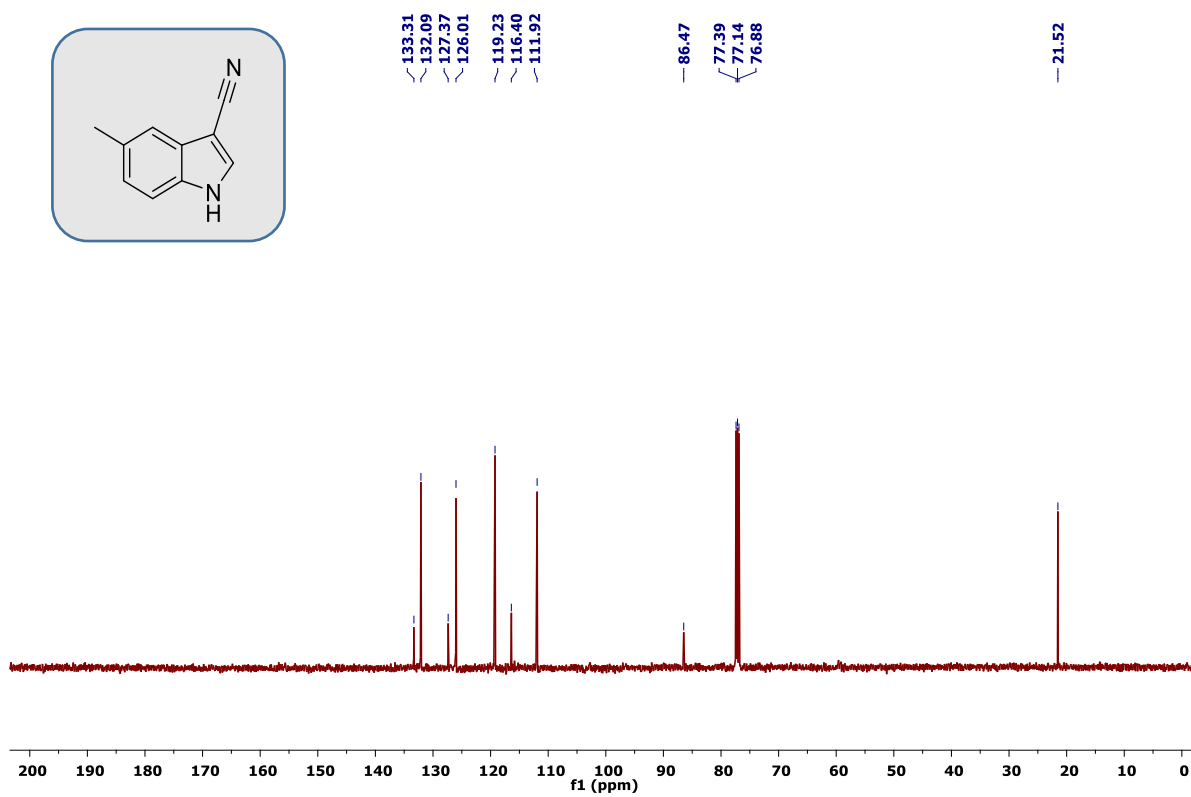

## HRMS-Spectra

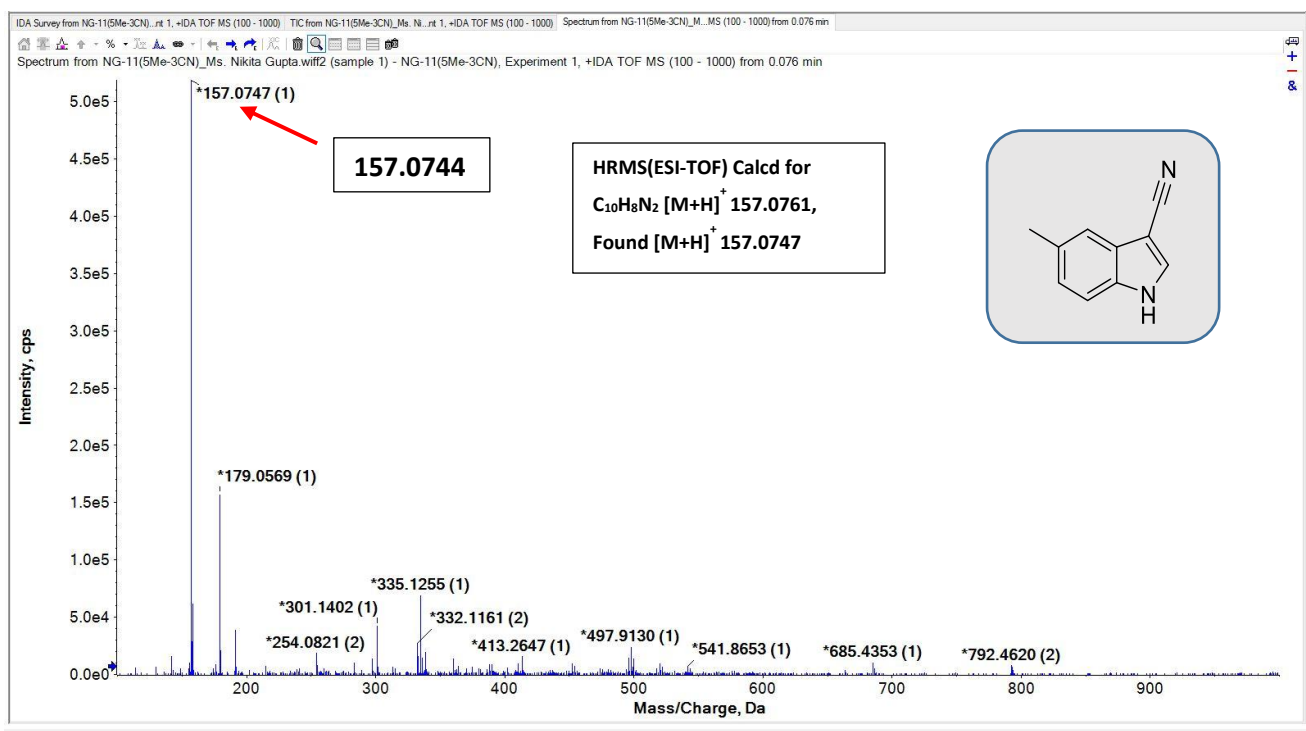

## 5-chloro-1H-indole-3-carbonitrile(3d)

### $^1H$ NMR (500 MHz, DMSO-d<sub>6</sub>)

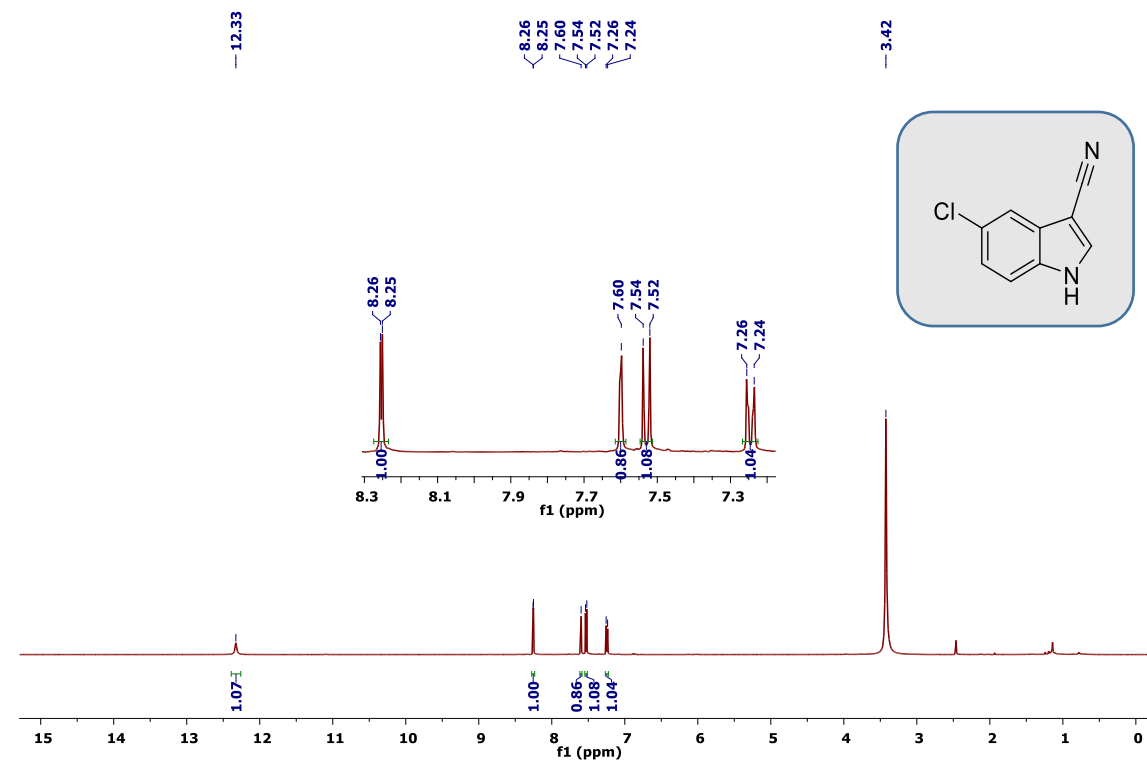

### <sup>13</sup>C NMR (126MHz, DMSO-d6)

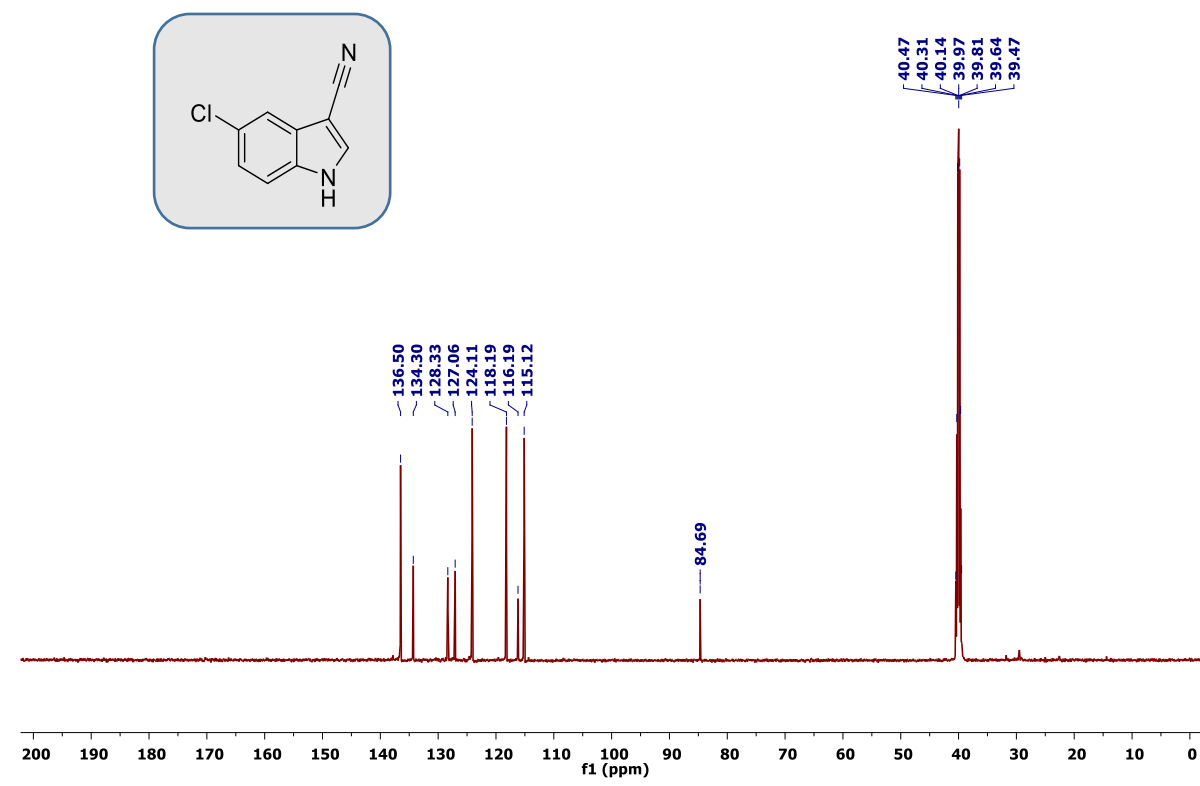

### HRMS-Spectra

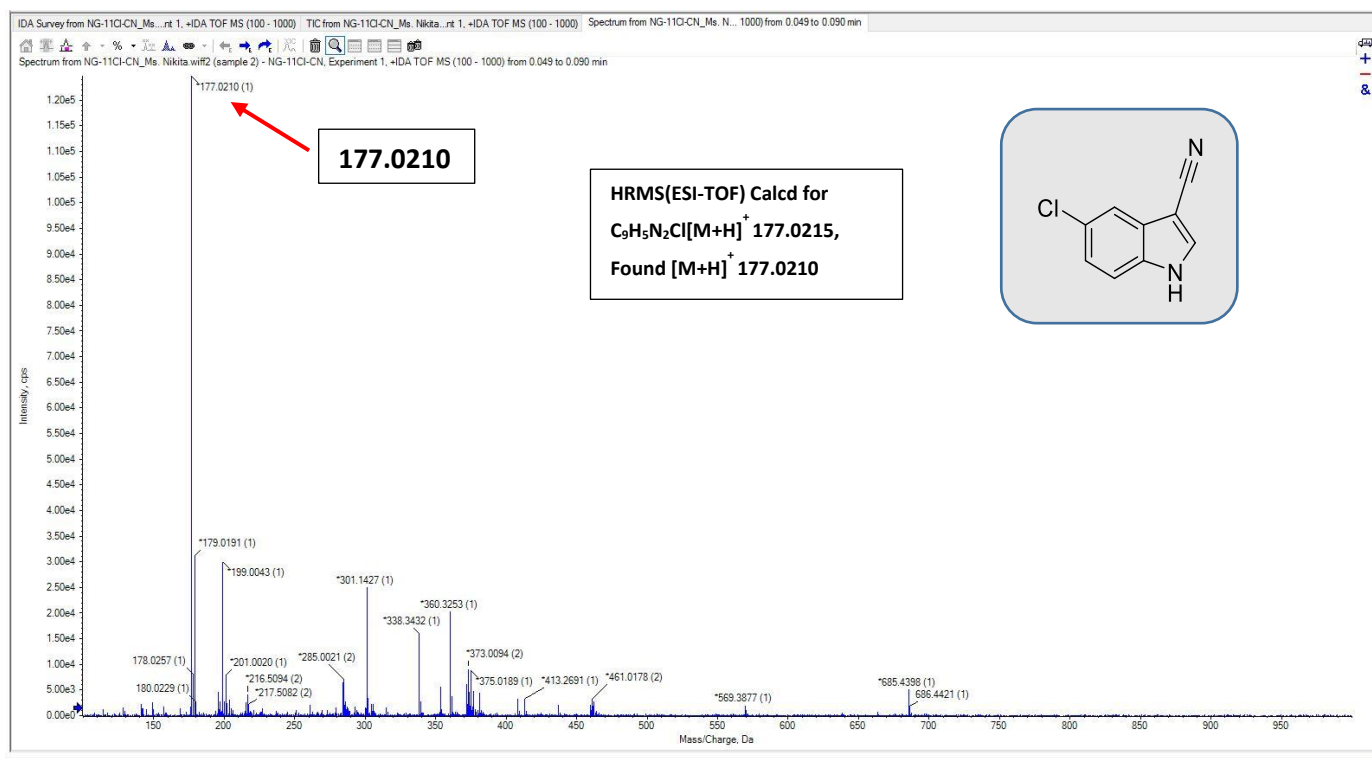

### 5-nitro-1H-indole-3-carbonitrile(3e)

<sup>1</sup>H NMR (500 MHz, DMSO-d6)

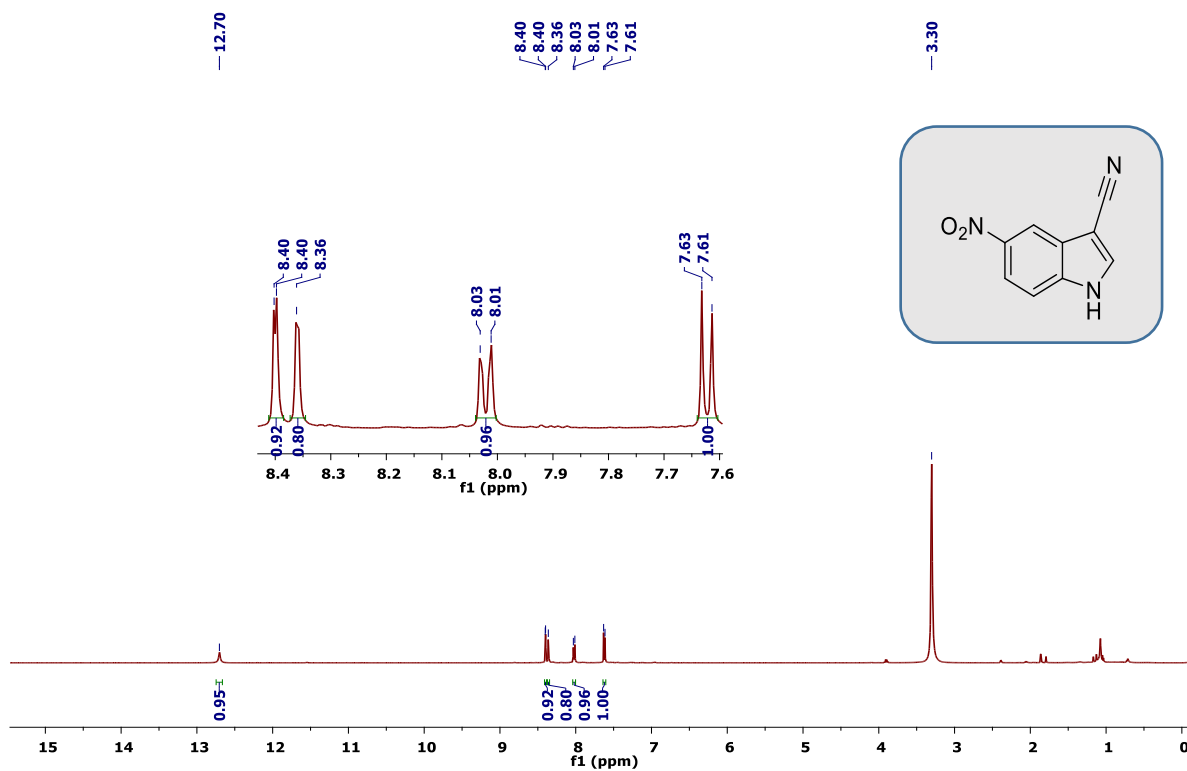

<sup>13</sup>C NMR (126 MHz, DMSO-d6)

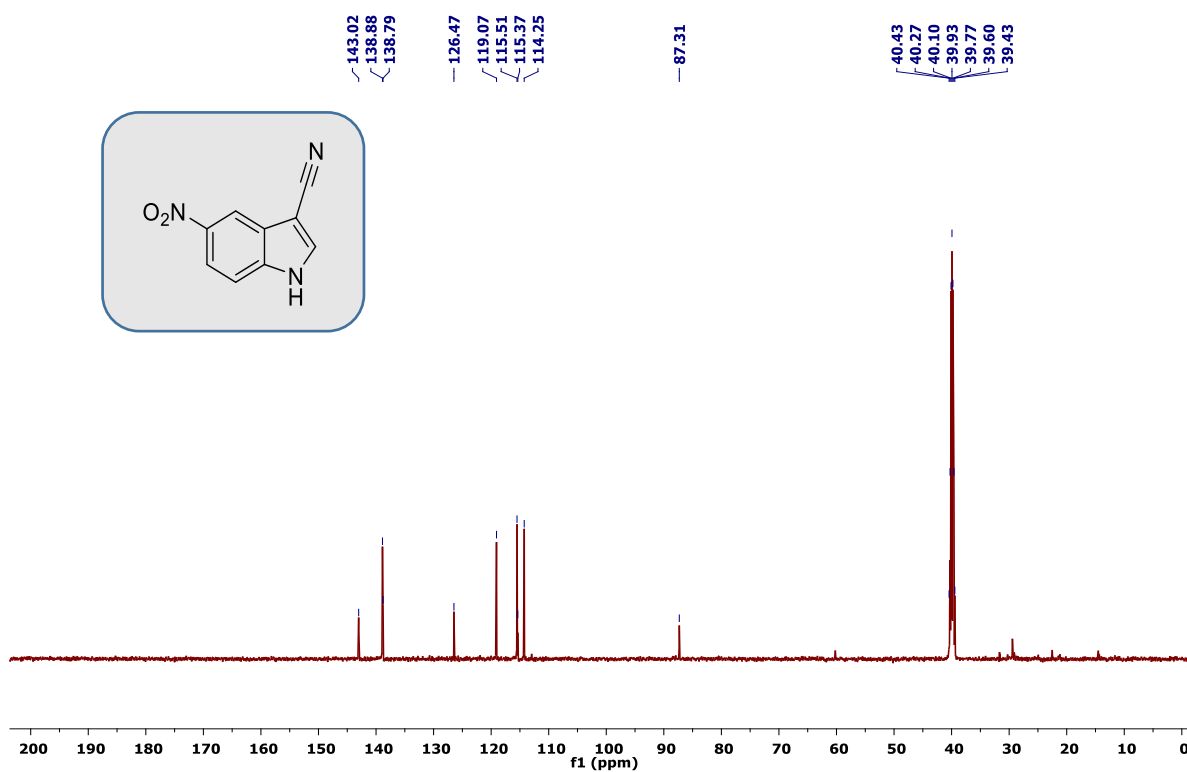

## HRMS-Spectra

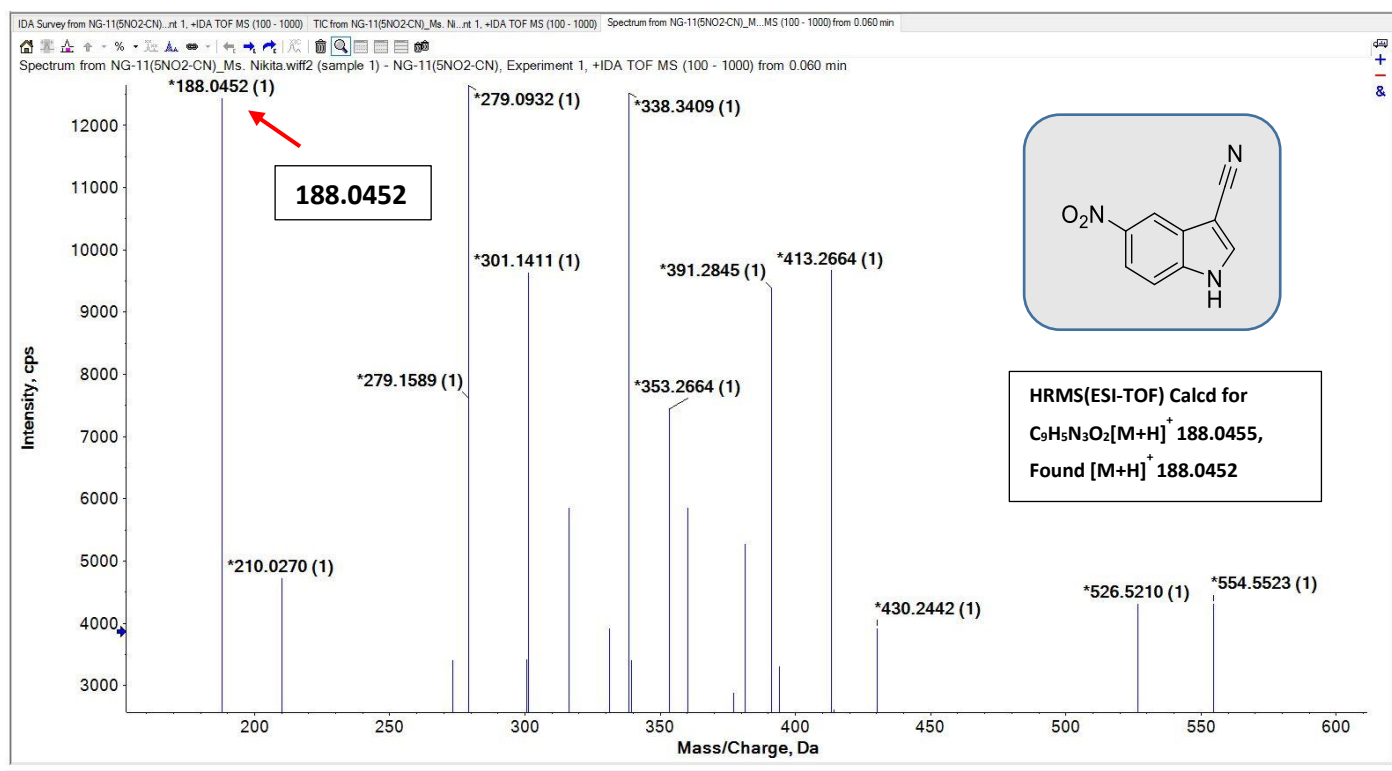

## 1H-indole-3,5-dicarbonitrile(3f)

### $^1H$ NMR (500 MHz, DMSO-d<sub>6</sub>)

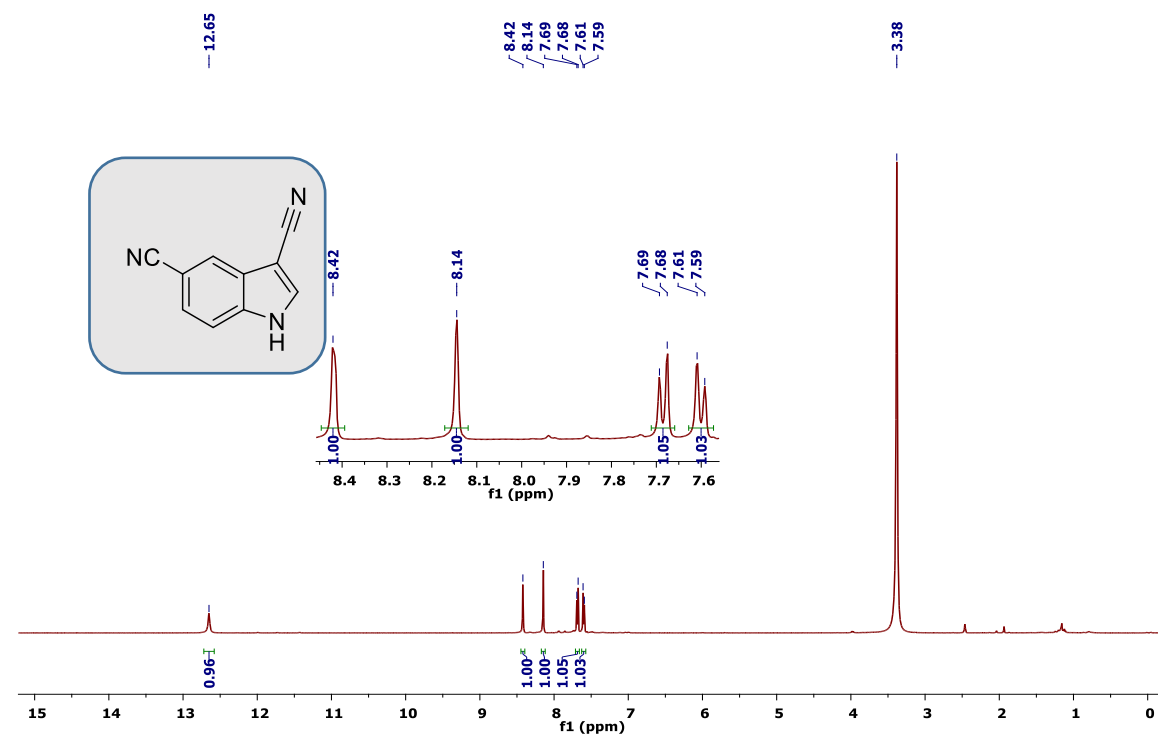

### <sup>13</sup>C NMR (126 MHz, DMSO-d6)

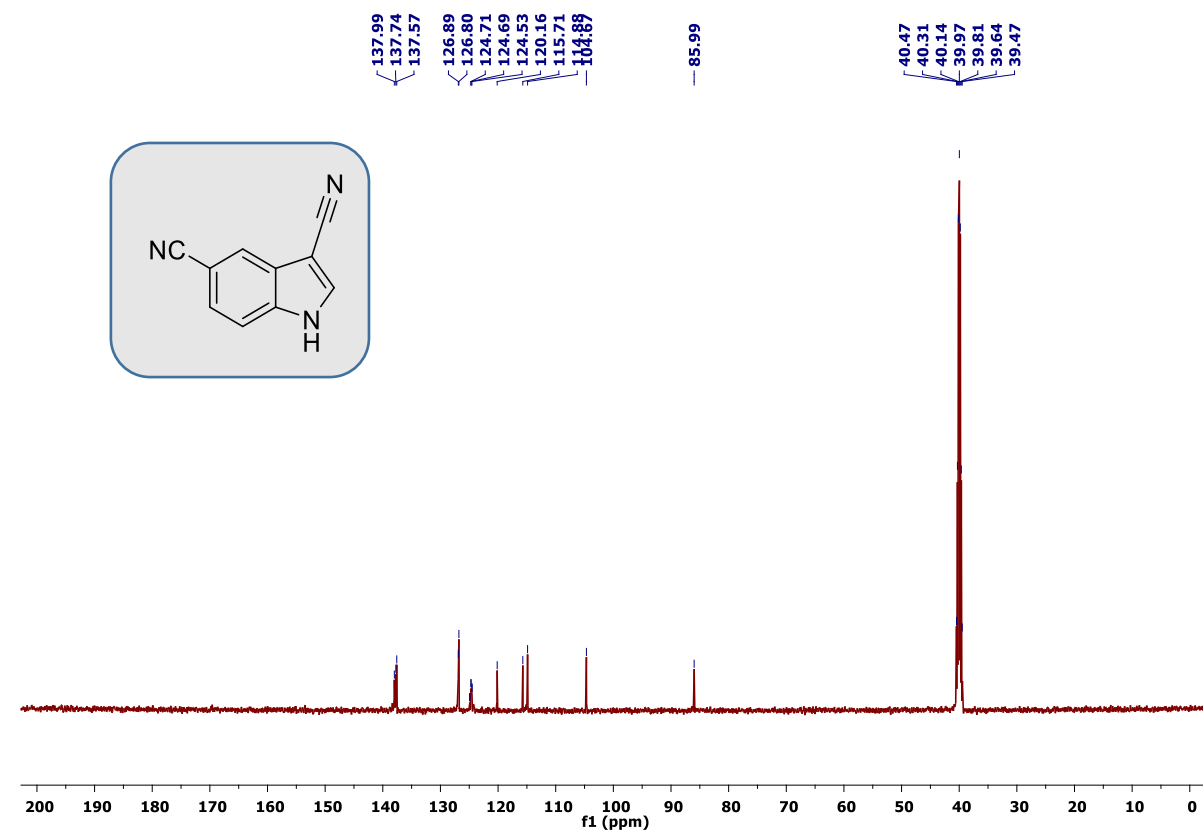

### HRMS-Spectra

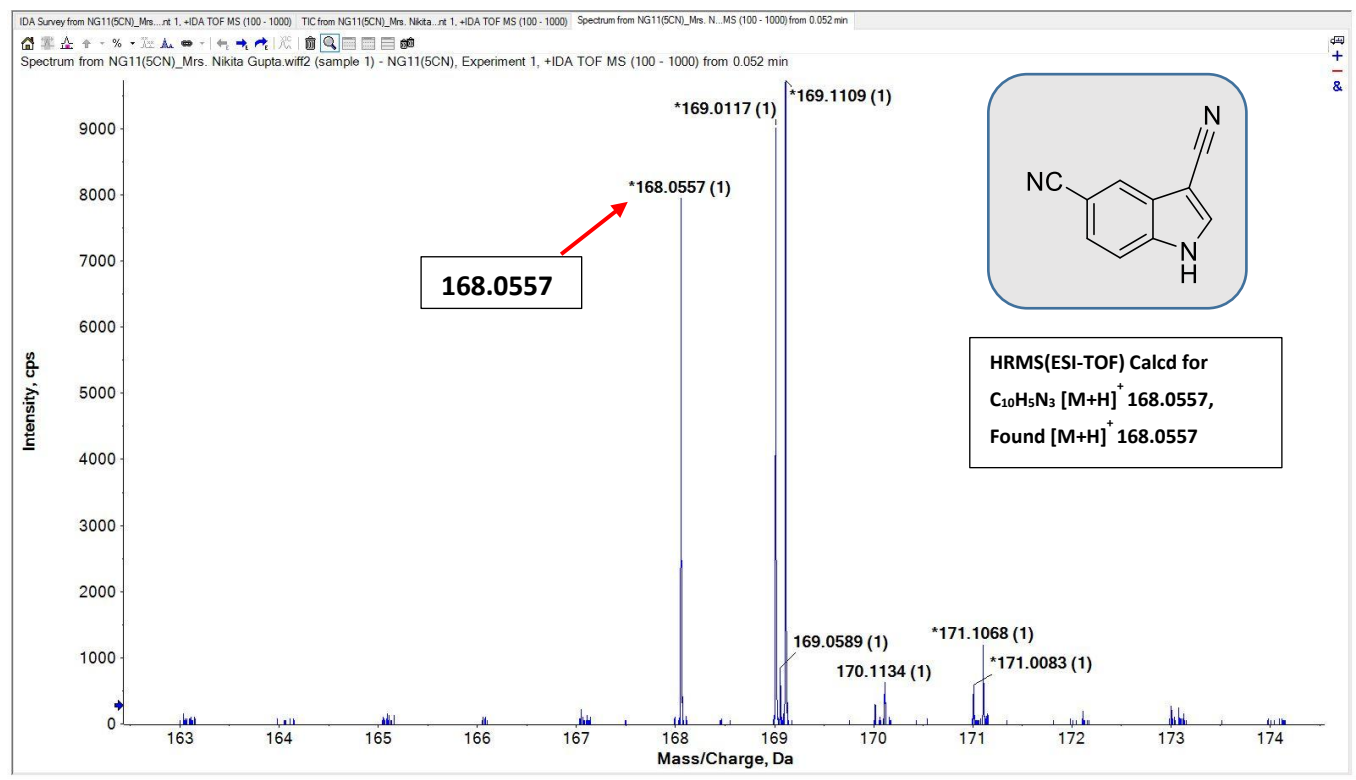

**5-chloro-2-(trifluoromethyl)-1H-indole-3-carbonitrile(3g)**

<sup>1</sup>H NMR (500 MHz, CDCl<sub>3</sub>)

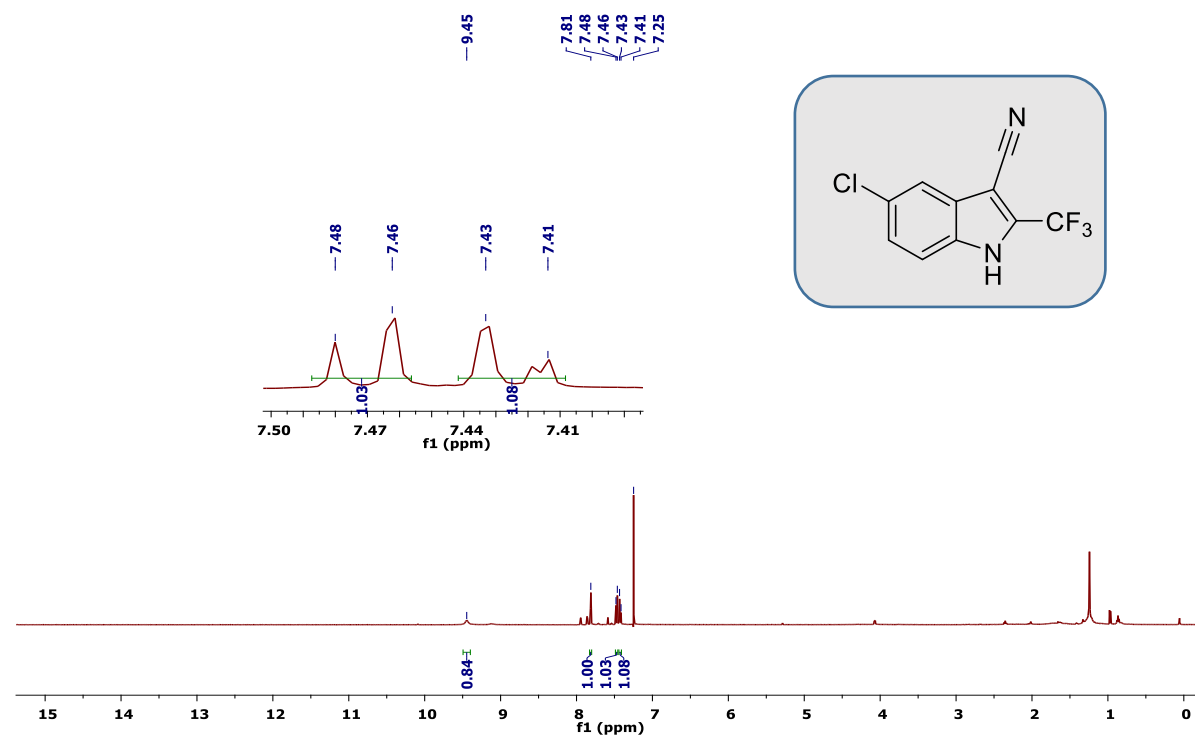

<sup>13</sup>C NMR (126 MHz, CDCl<sub>3</sub>)

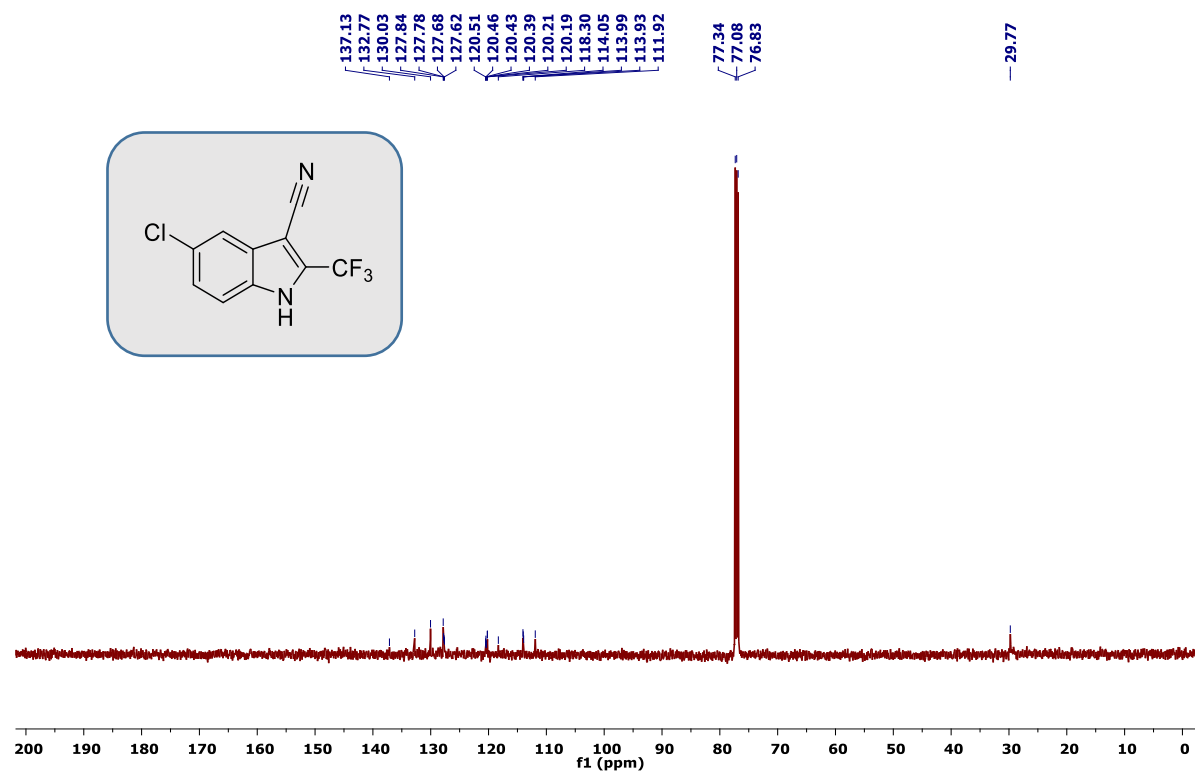

## HRMS-Spectra

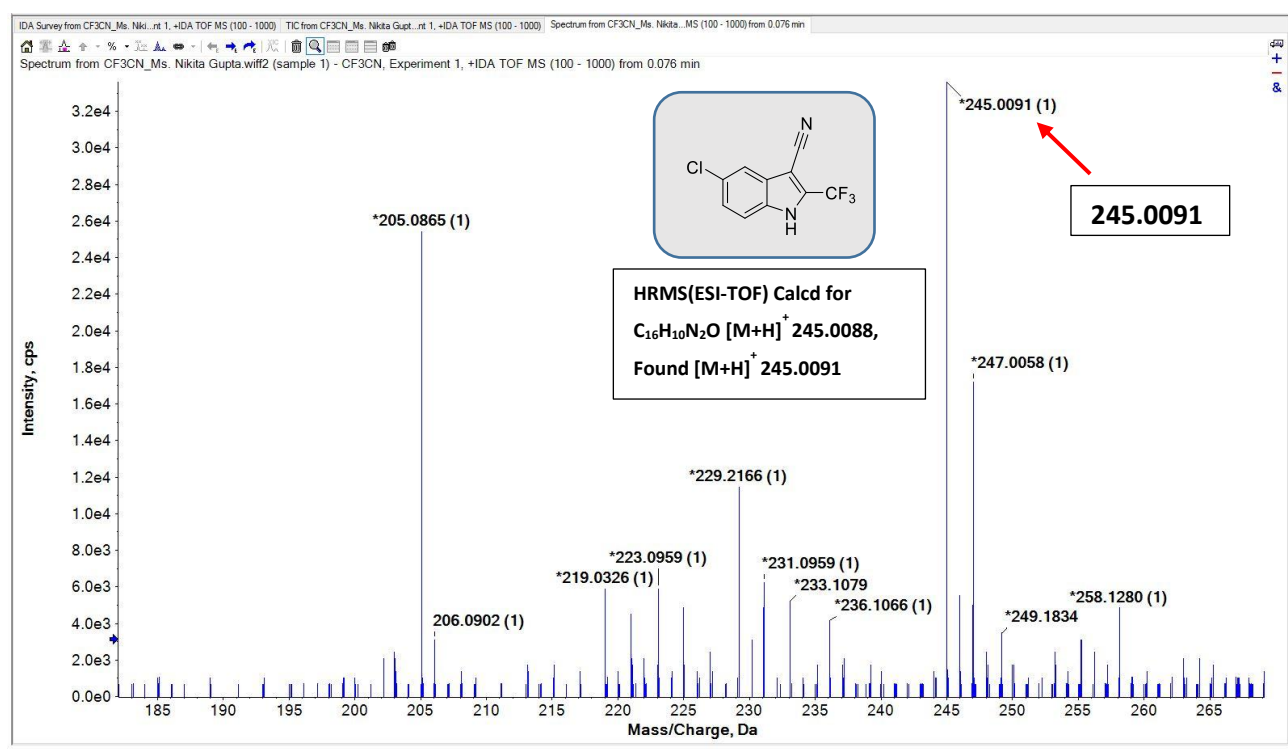

2-(4-

chlorophenyl)-1-methyl-1H-indole-3-carbonitrile(3h)

$^1H$  NMR (500 MHz,  $CDCl_3$ )

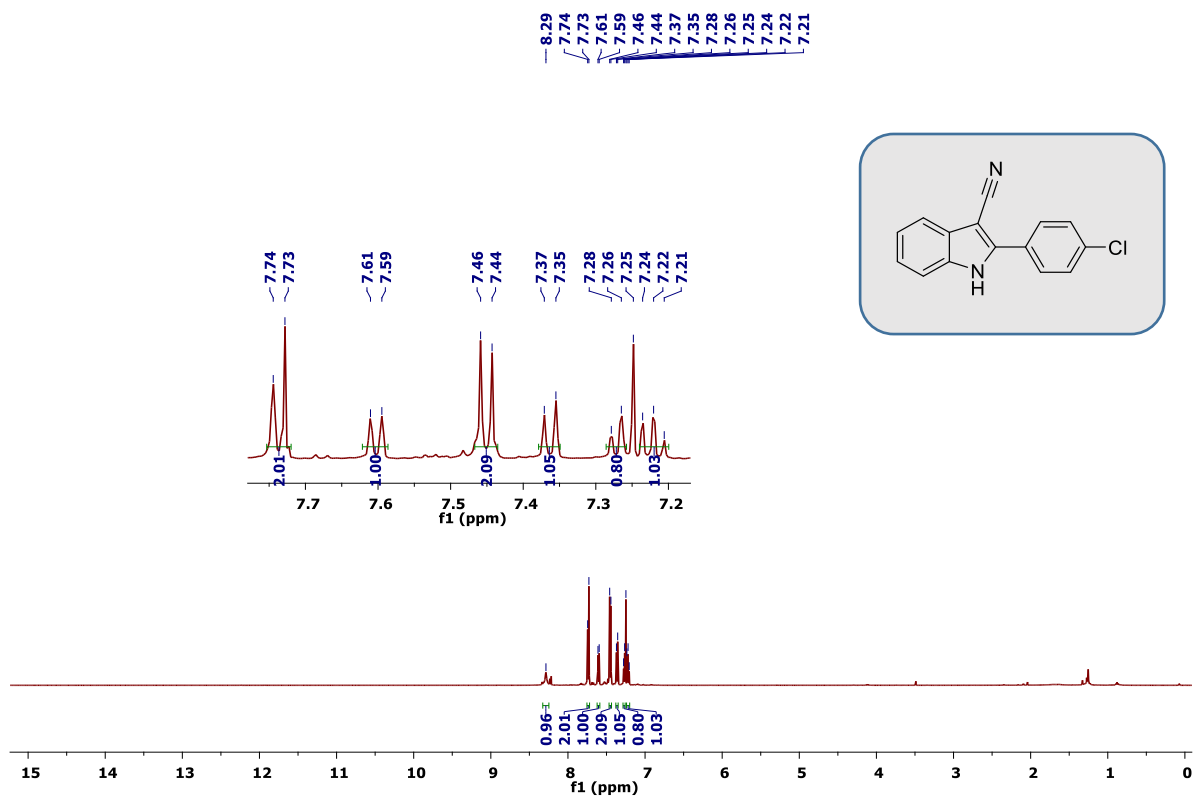

<sup>13</sup>C NMR (126 MHz, CDCl<sub>3</sub>)

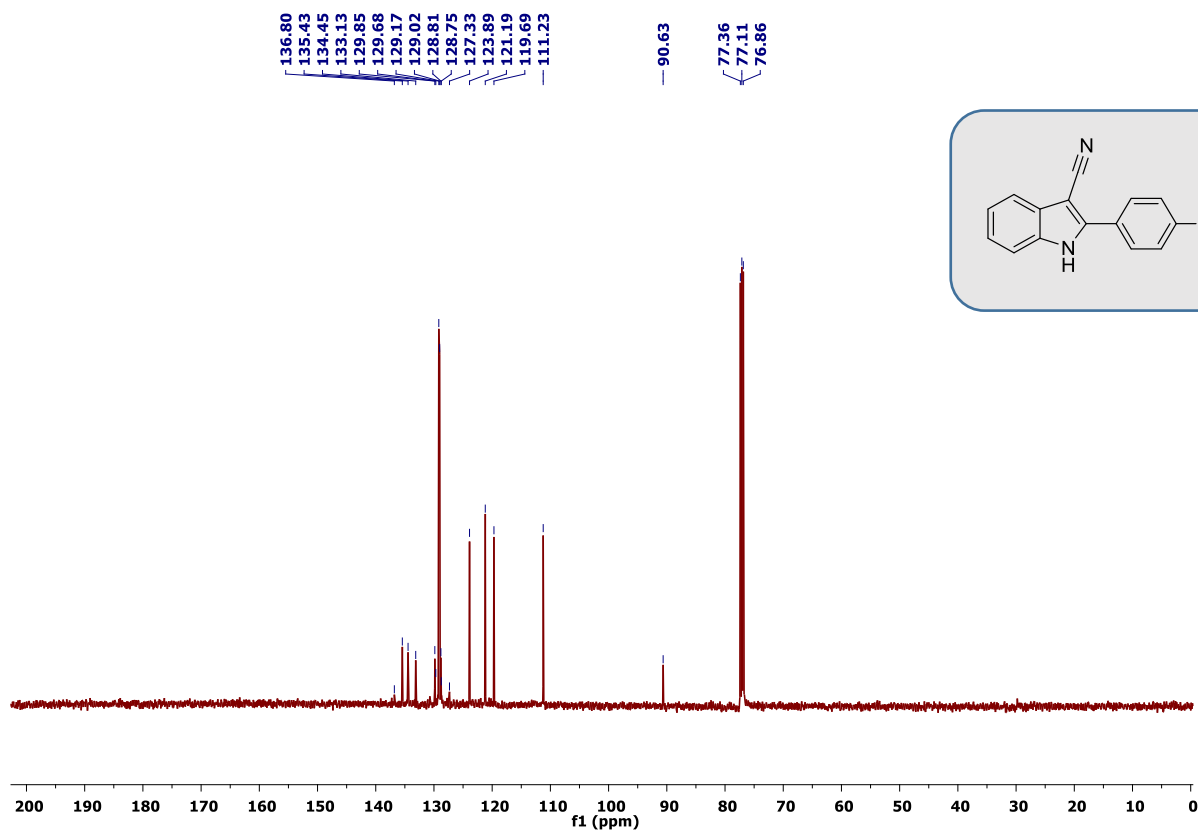

## HRMS-Spectra

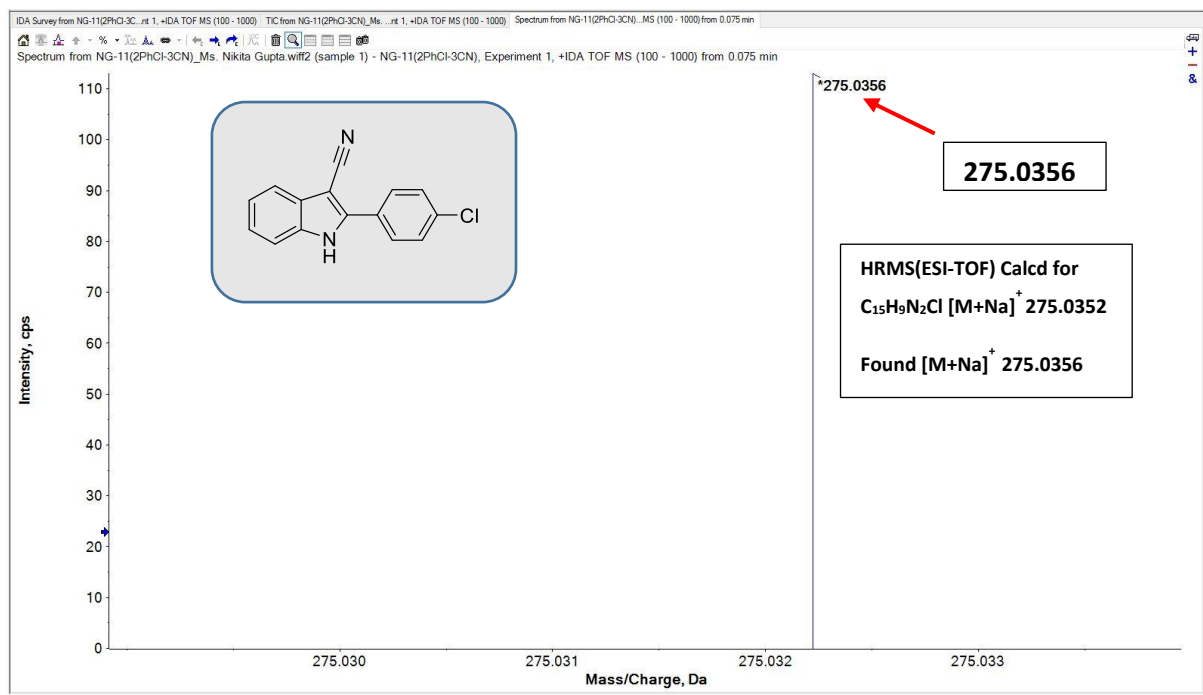

## 1-methyl-1H-indole-3-carbonitrile(3i)

$^1H$  NMR (500 MHz,  $CDCl_3$ )

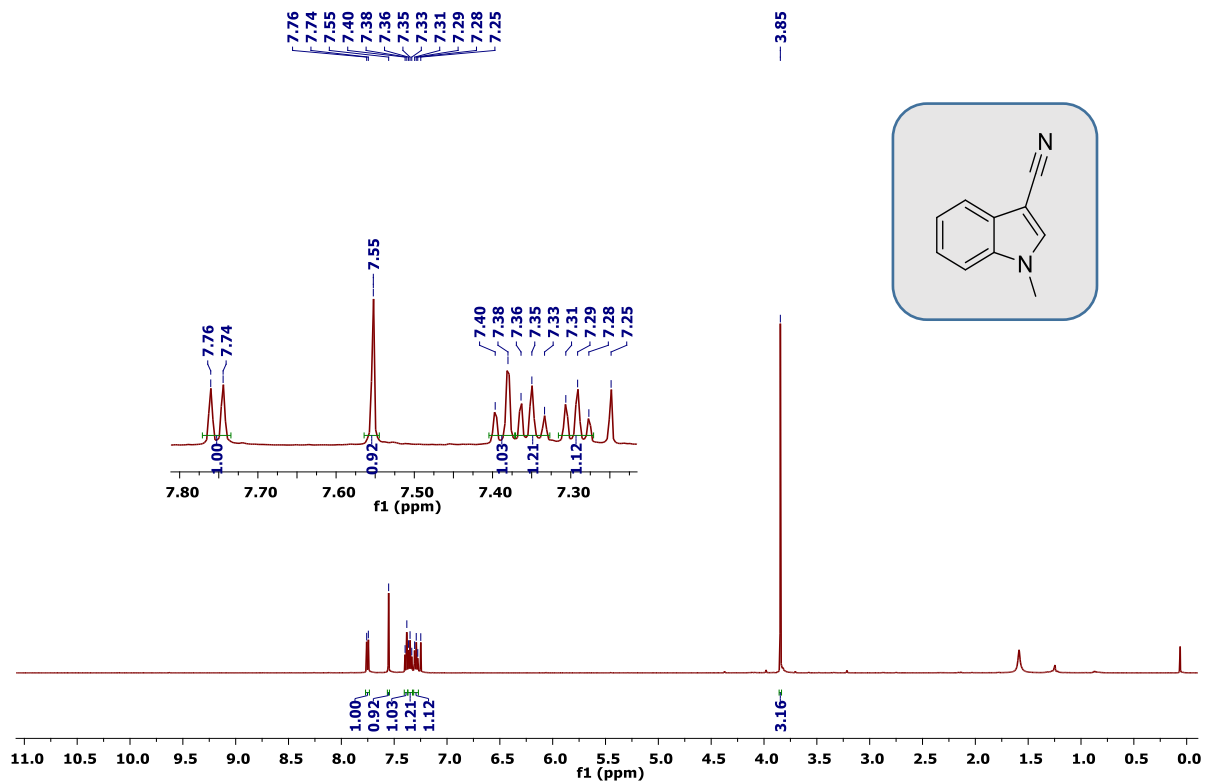

**<sup>13</sup>C NMR (126 MHz, CDCl<sub>3</sub>)**

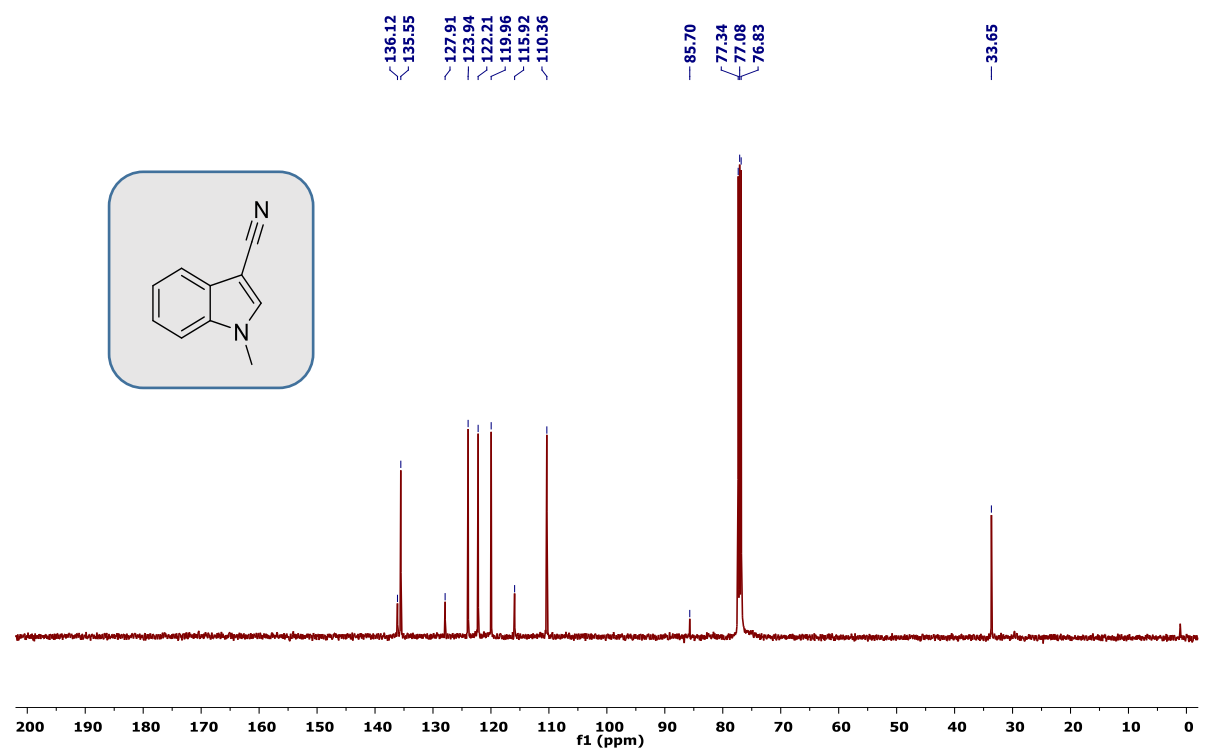

## HRMS-Spectra

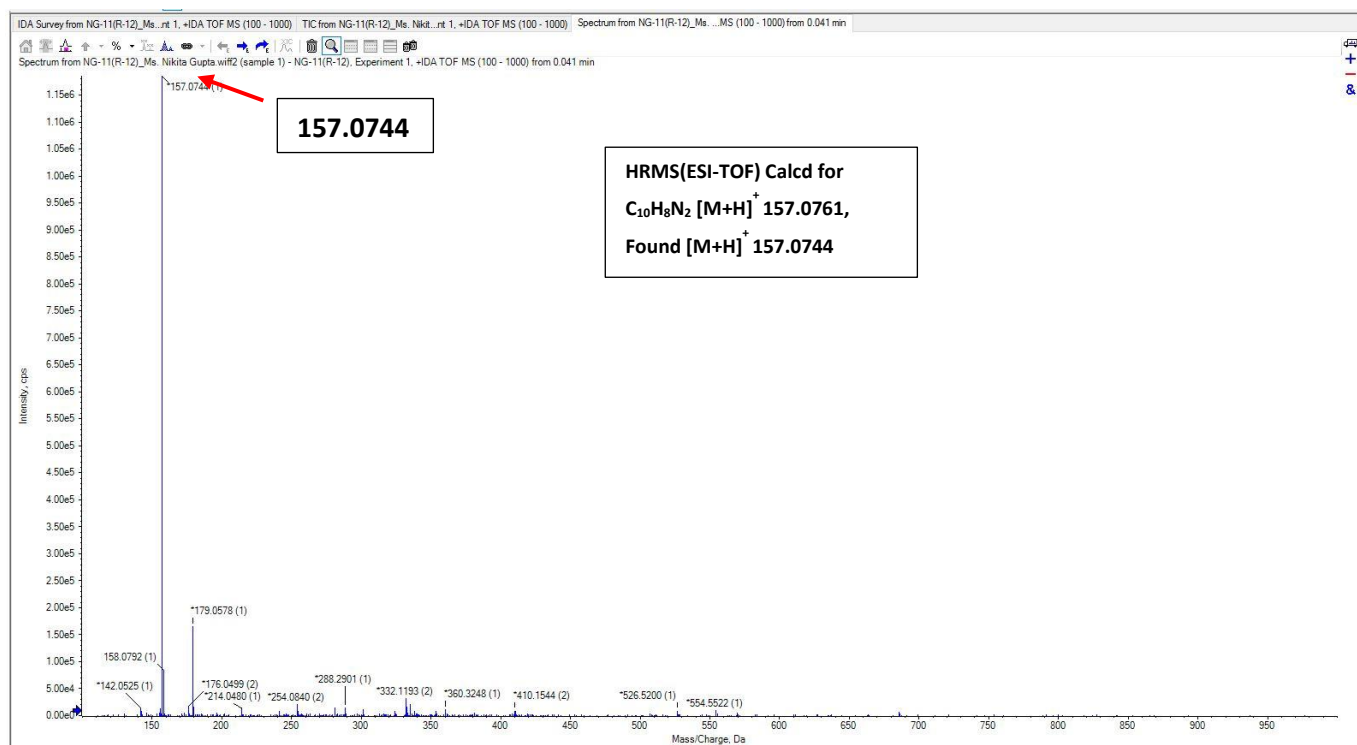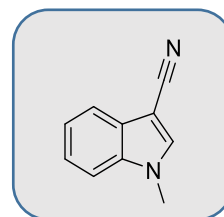

### 1-methyl-2-phenyl-1H-indole-3-carbonitrile(3j)

$^1H$  NMR (500 MHz,  $CDCl_3$ )

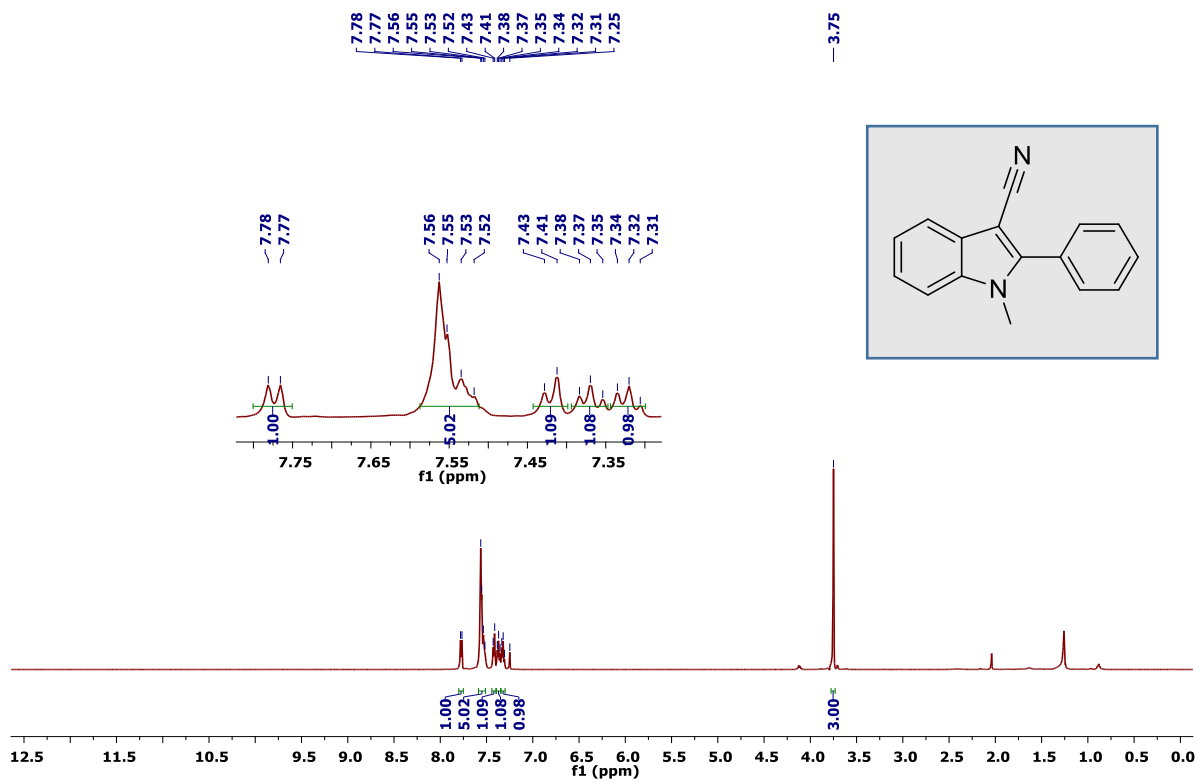

**<sup>13</sup>C NMR (126 MHz, CDCl<sub>3</sub>)**

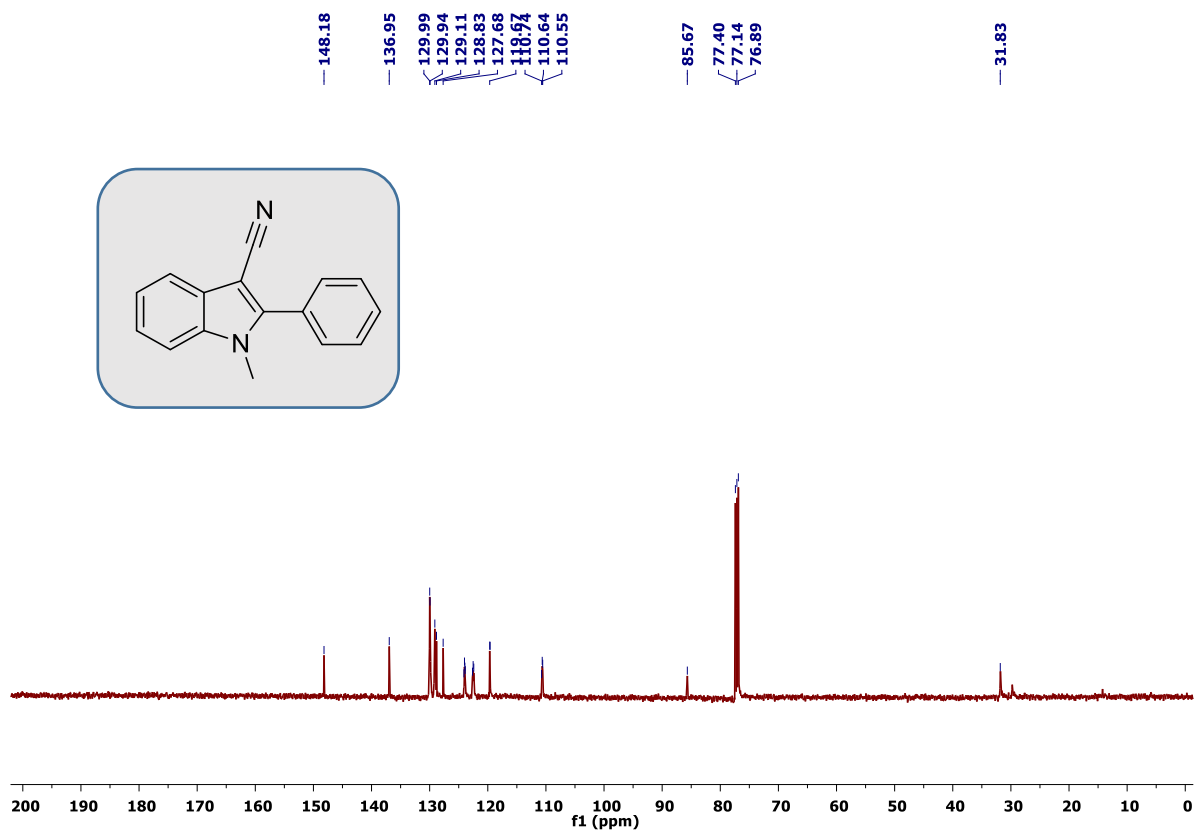

## HRMS-Spectra

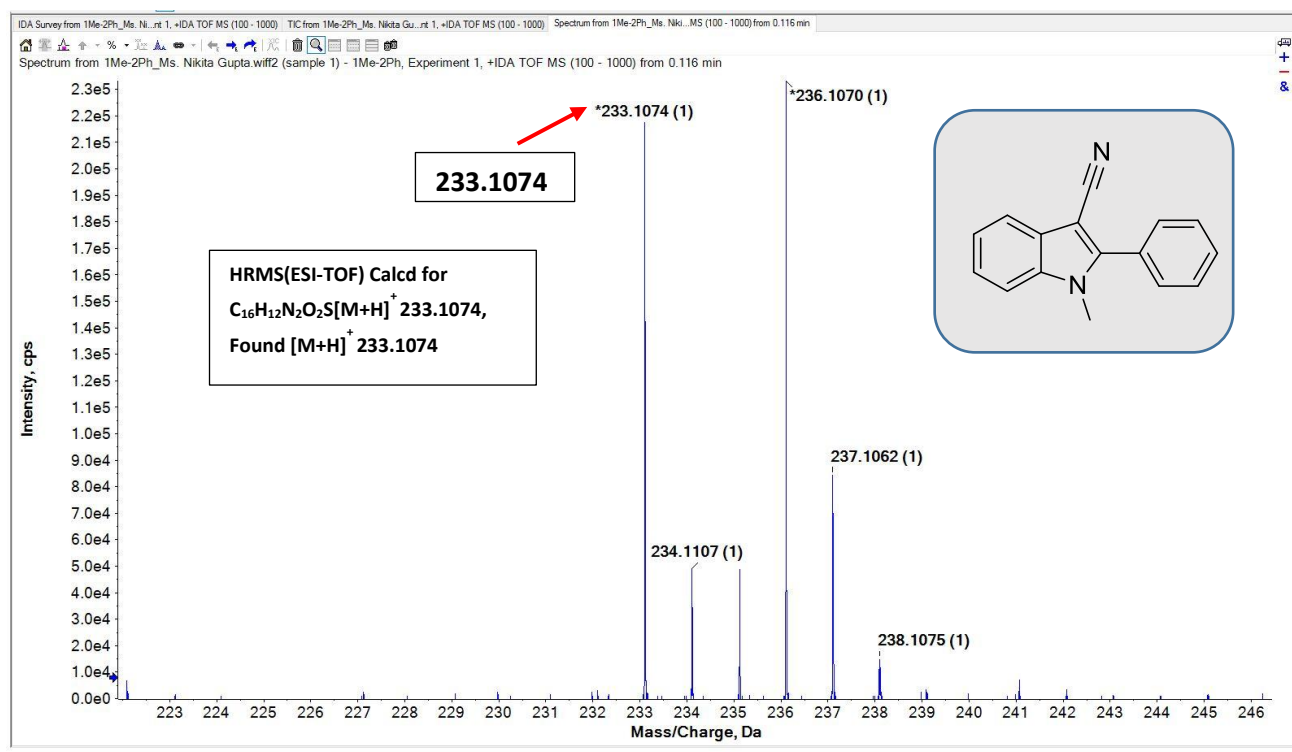

### 1-benzyl-1H-indole-3-carbonitrile(3k)

$^1H$  NMR (500 MHz,  $CDCl_3$ )

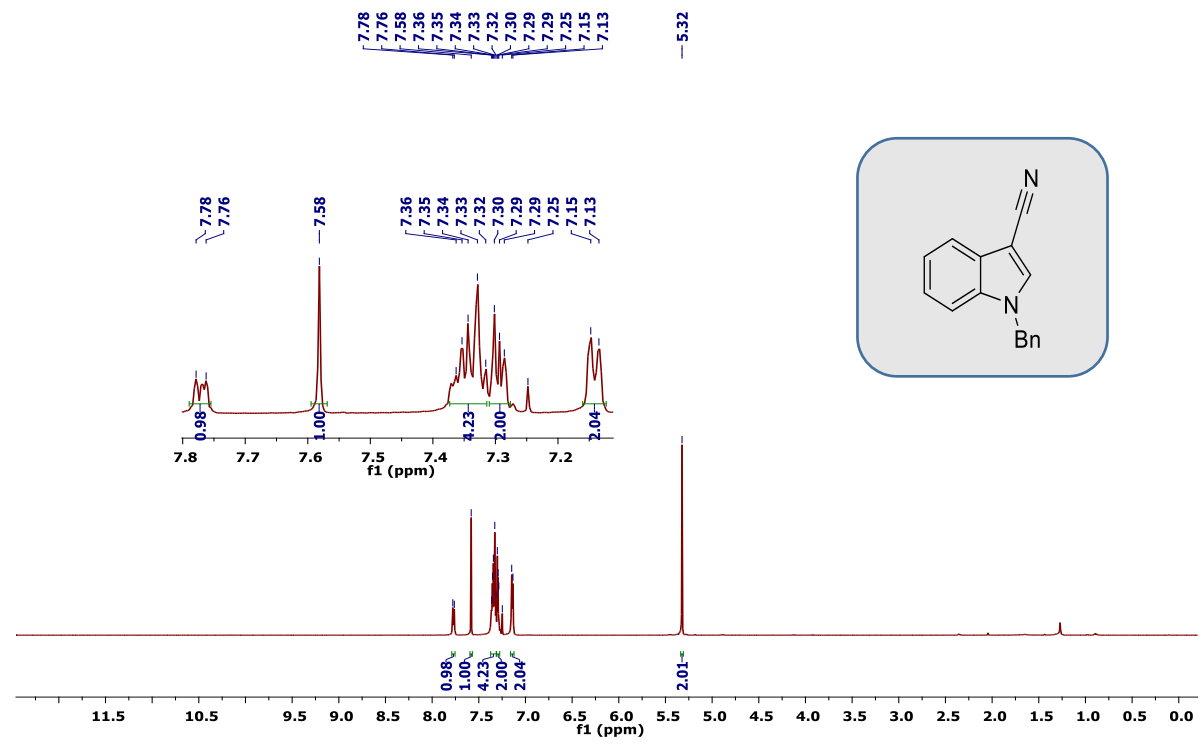

**<sup>13</sup>C NMR (126 MHz, CDCl<sub>3</sub>)**

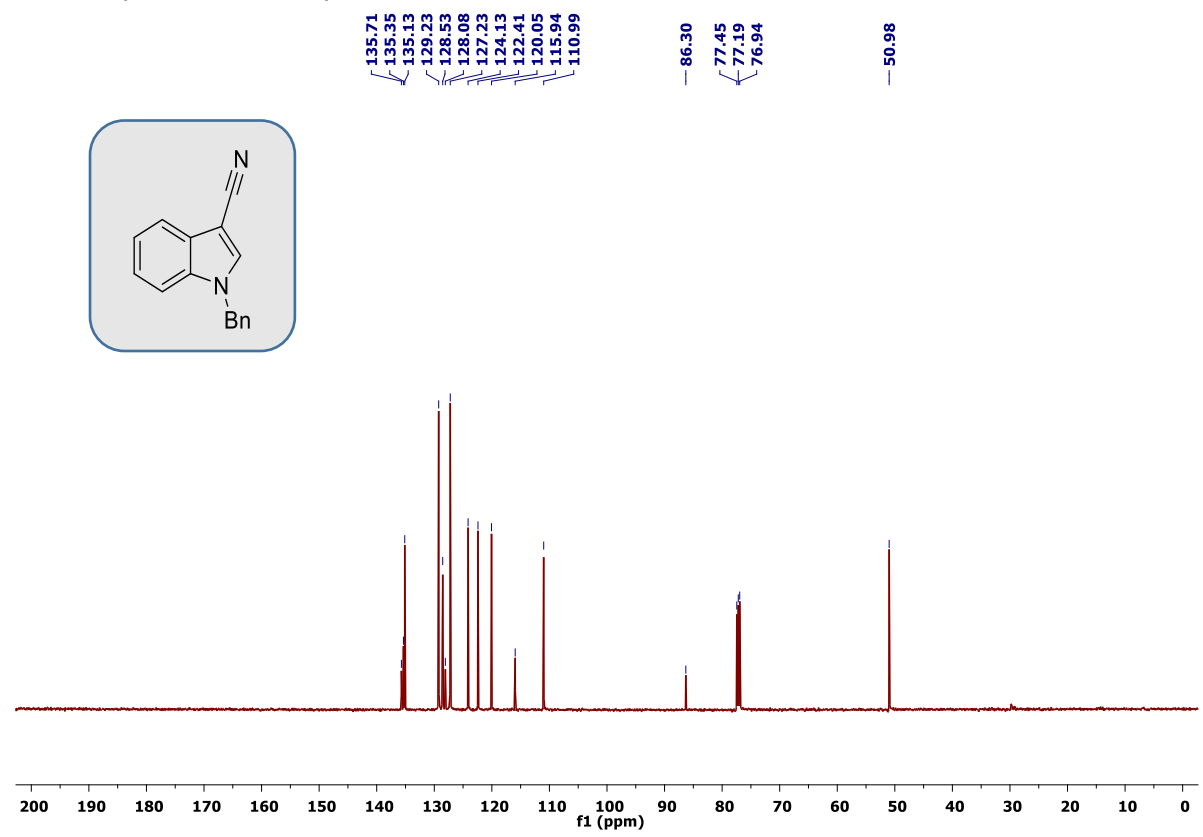

## HRMS-Spectra

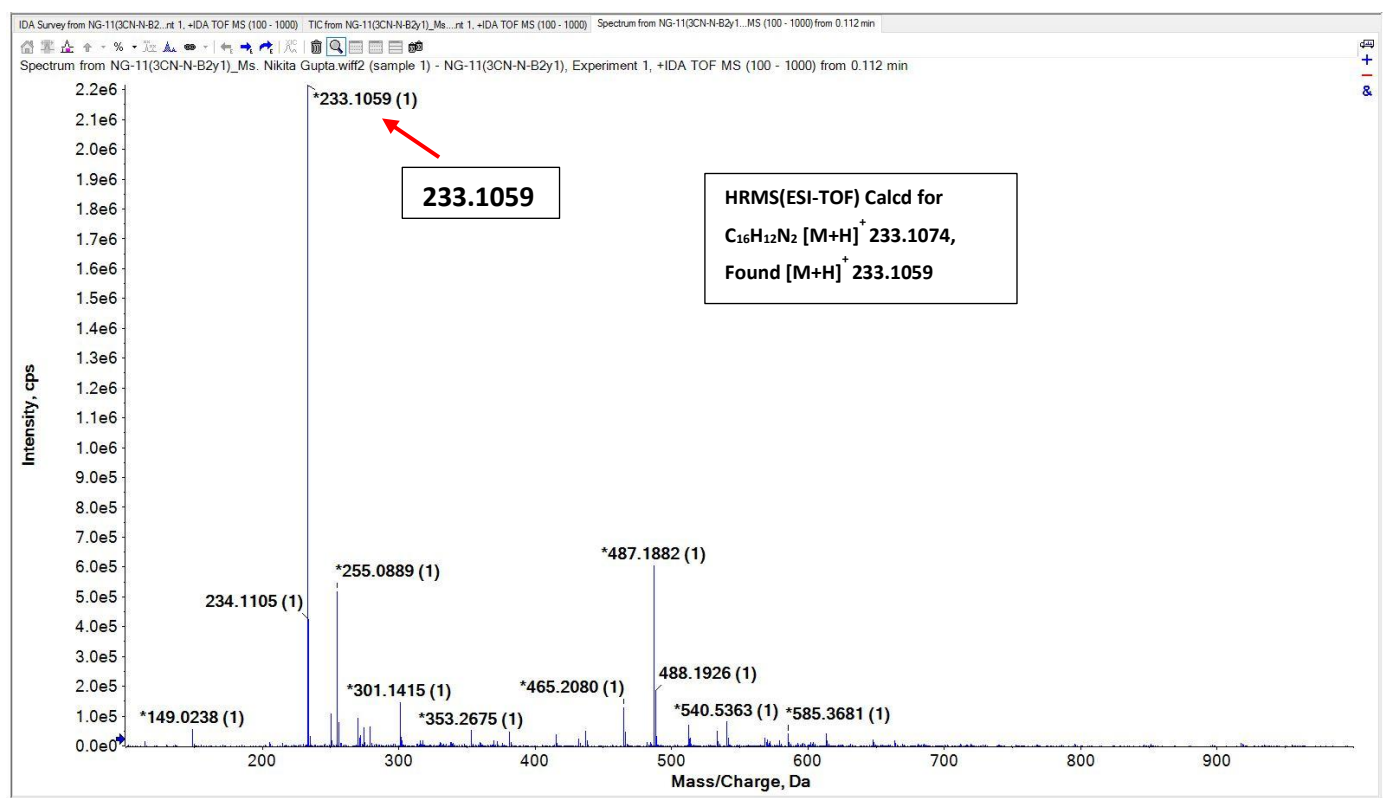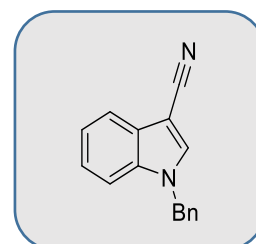

### 1-benzyl-5-chloro-1H-indole-3-carbonitrile(3I)

$^1H$  NMR (500 MHz,  $CDCl_3$ )

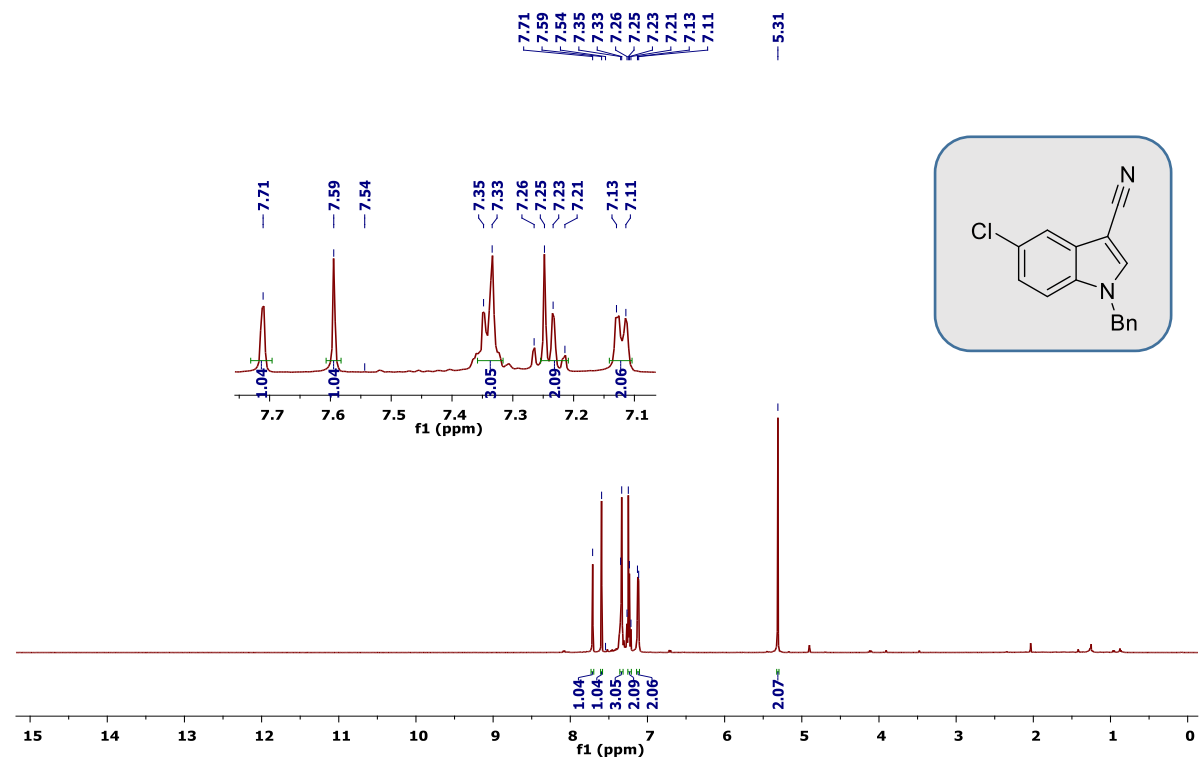

**<sup>13</sup>C NMR (126 MHz, CDCl<sub>3</sub>)**

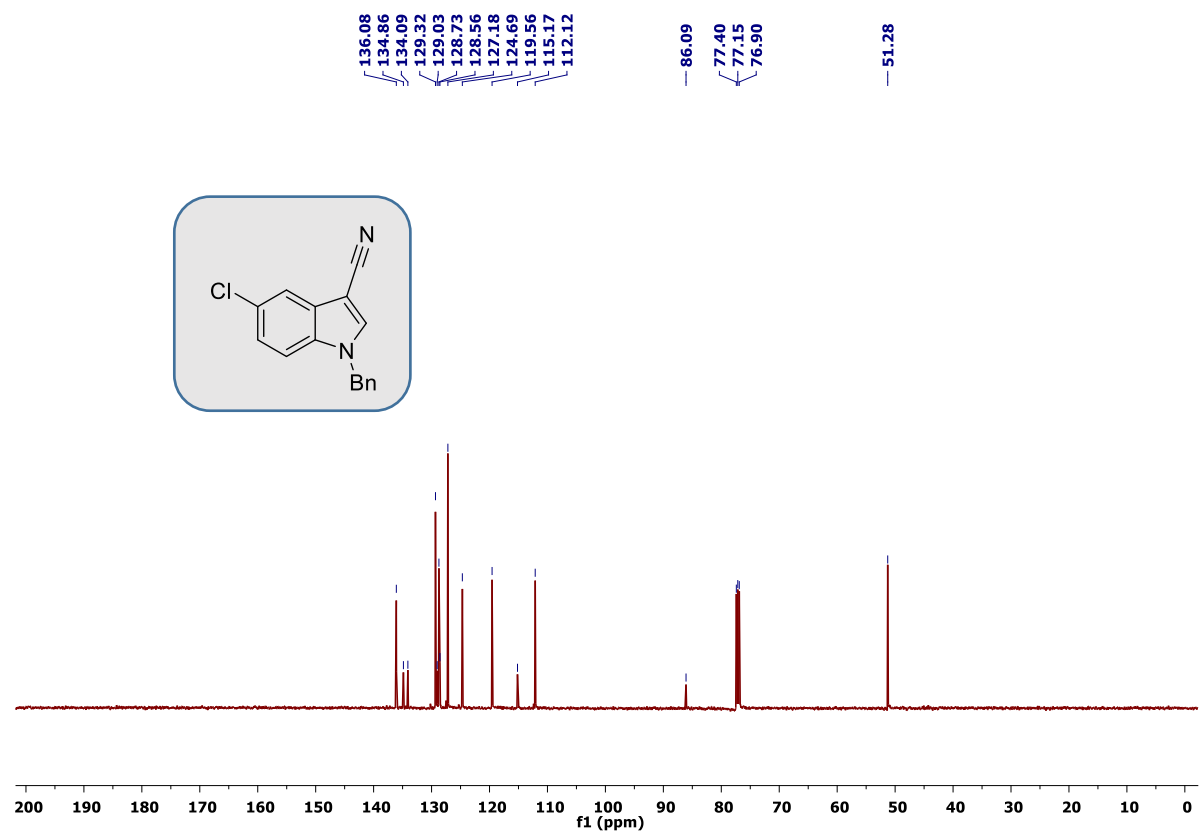

## HRMS-Spectra

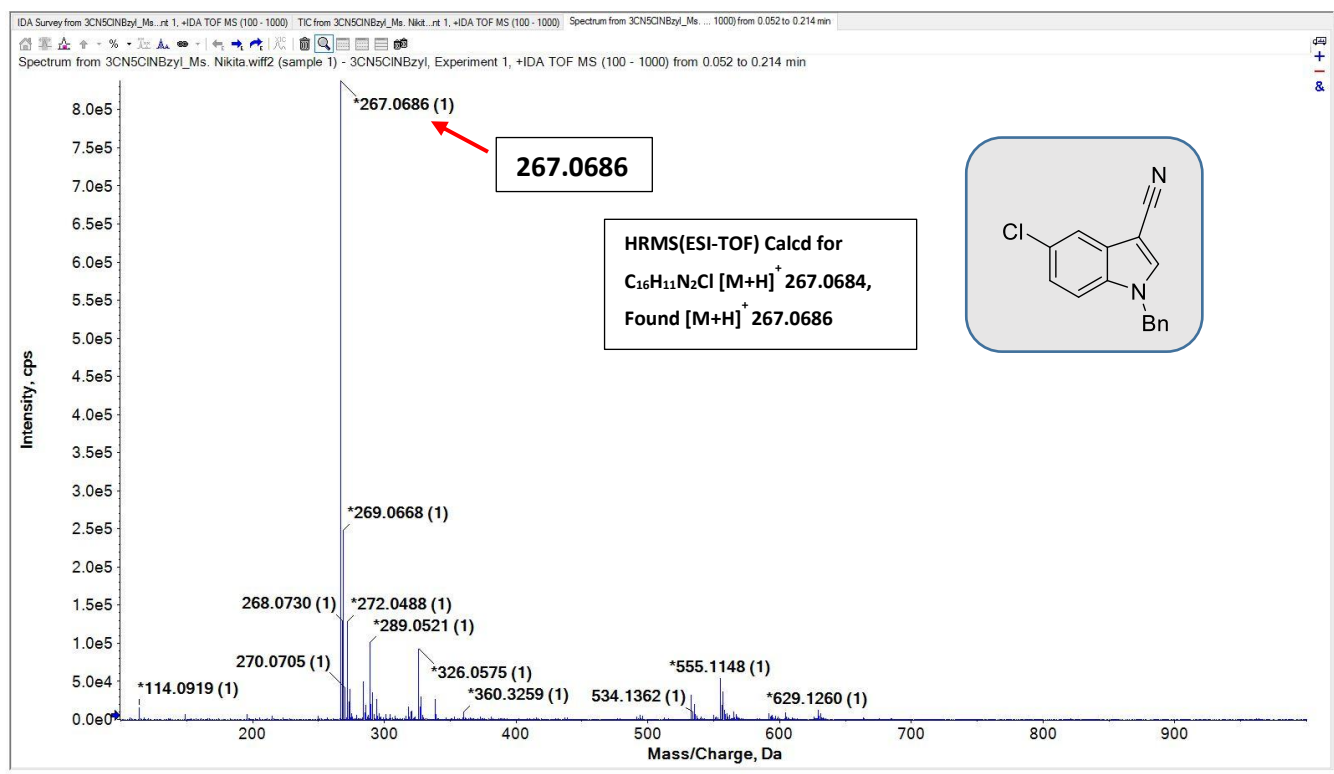

1-

### tosyl-1H-indole-3-carbonitrile(3m)

$^1H$  NMR (500 MHz,  $CDCl_3$ )

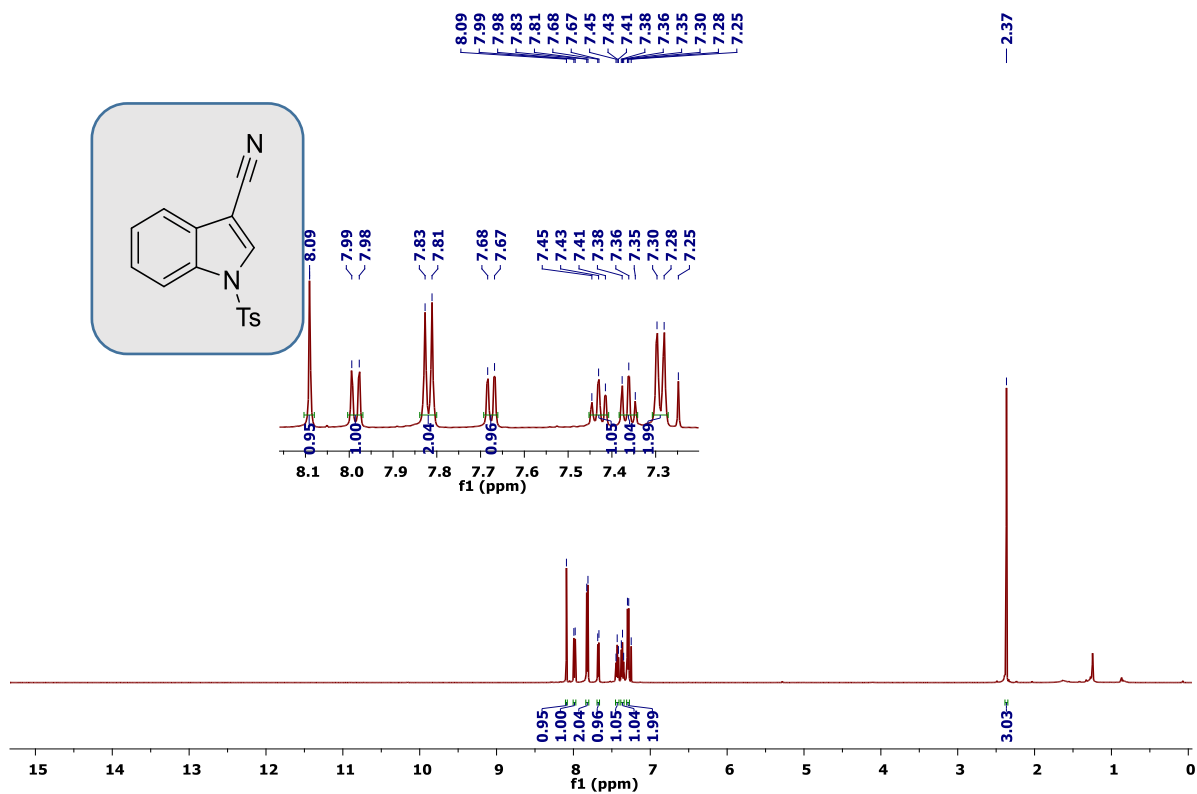

**<sup>13</sup>C NMR (126MHz, CDCl<sub>3</sub>)**

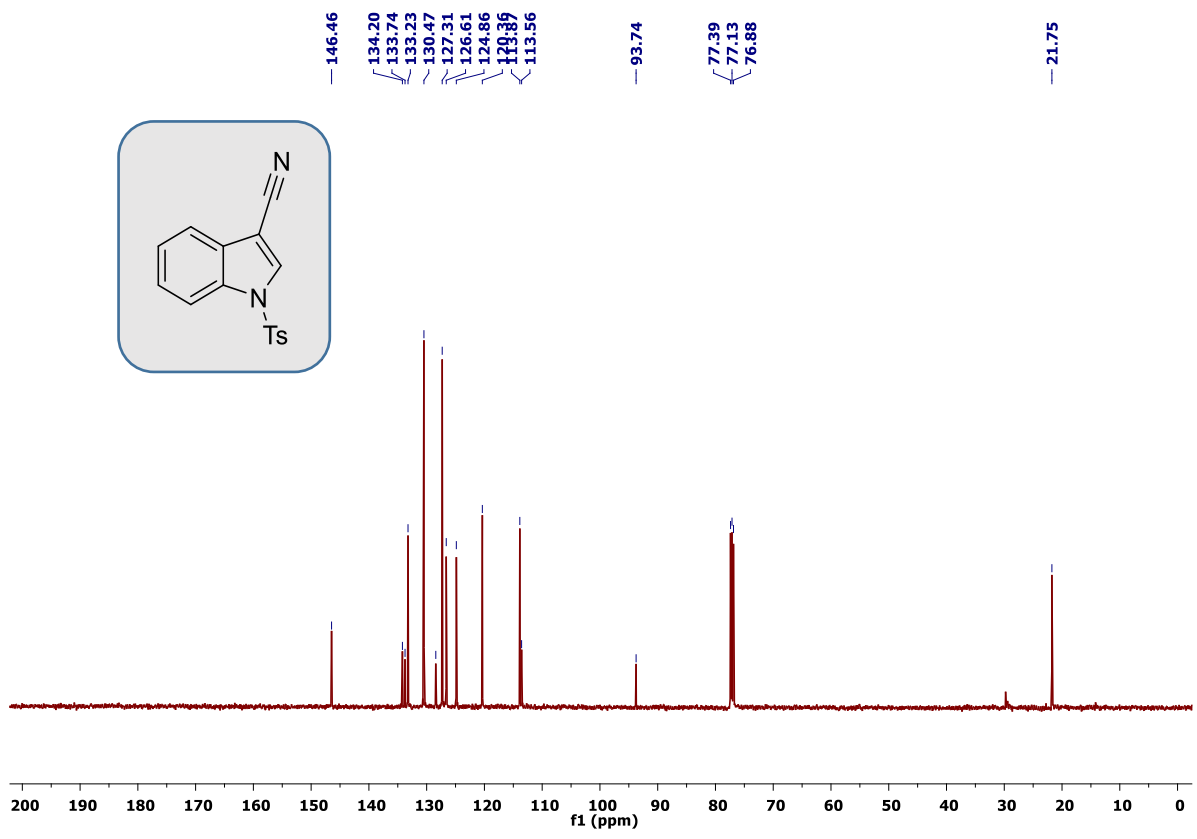

## HRMS-Spectra

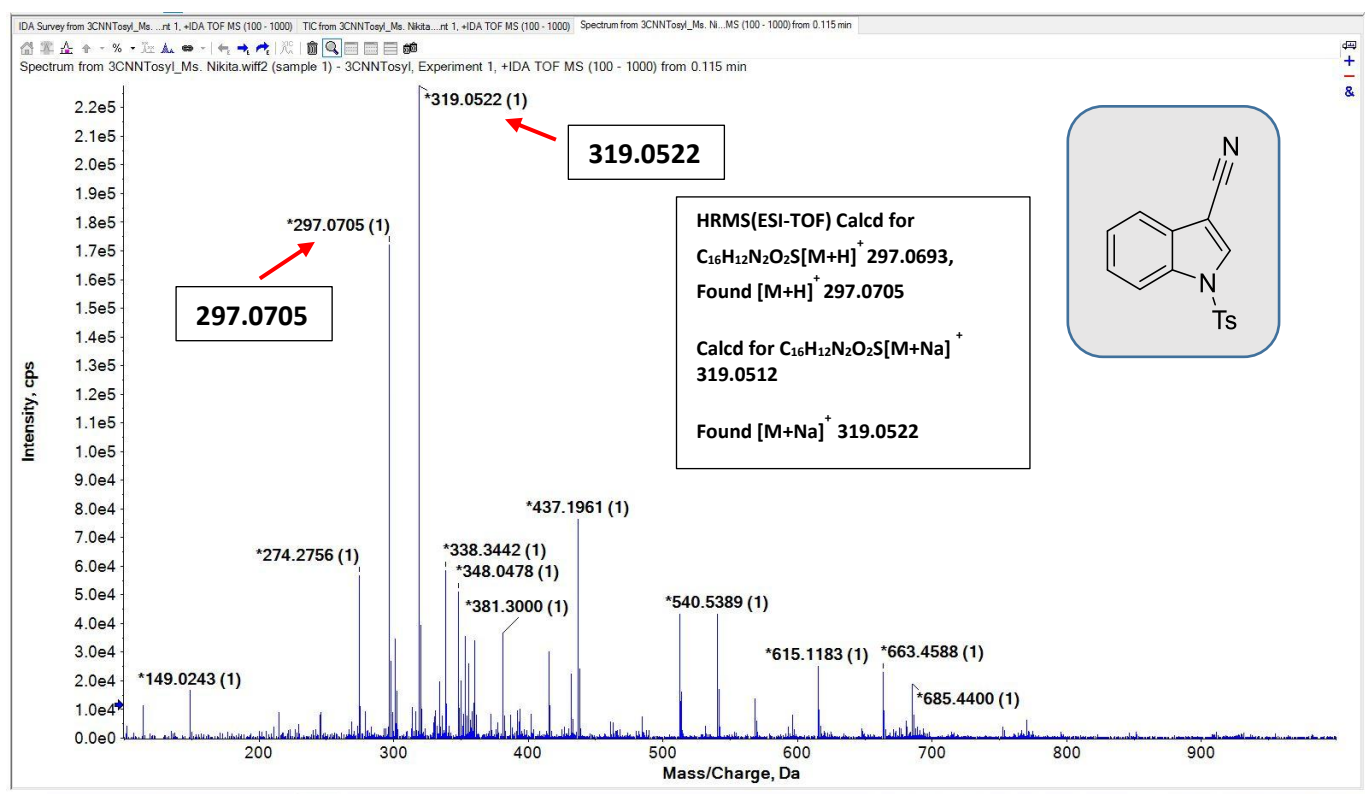

## benzofuran-3-carbonitrile(3n) $^1H$ NMR (500 MHz, $CDCl_3$ )

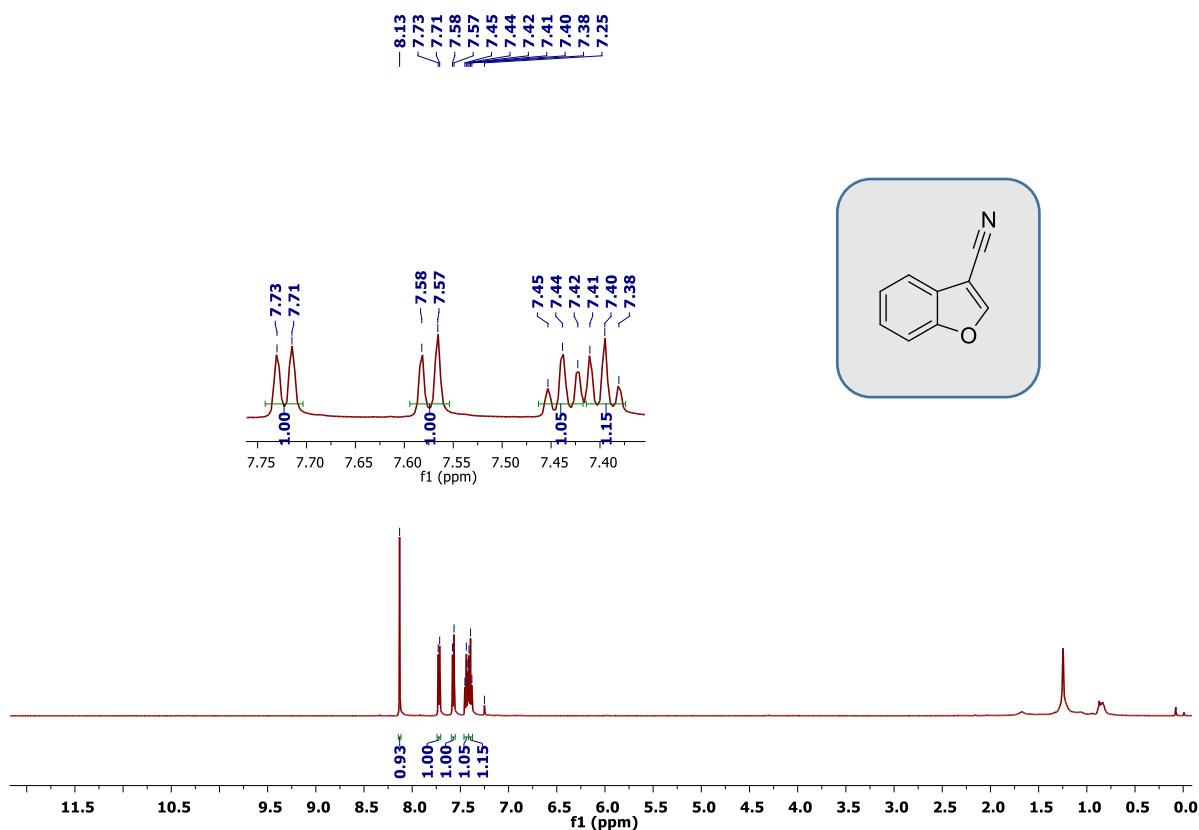

<sup>13</sup>C NMR (126 MHz, CDCl<sub>3</sub>)

154.54  
152.04  
126.72  
124.87  
124.83  
120.35  
112.39  
112.33  
95.08  
77.40  
77.14  
76.89

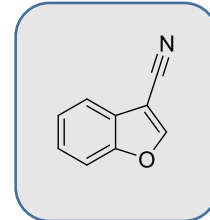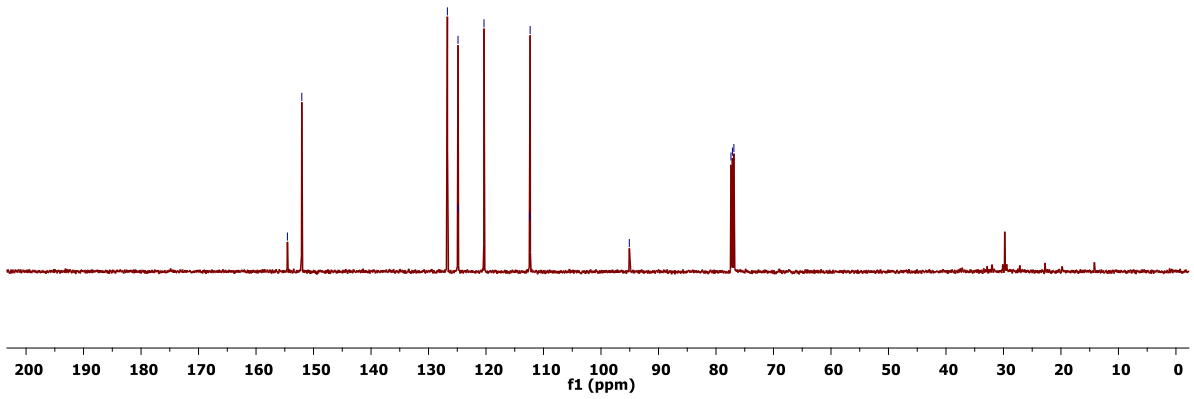

HRMS-Spectra

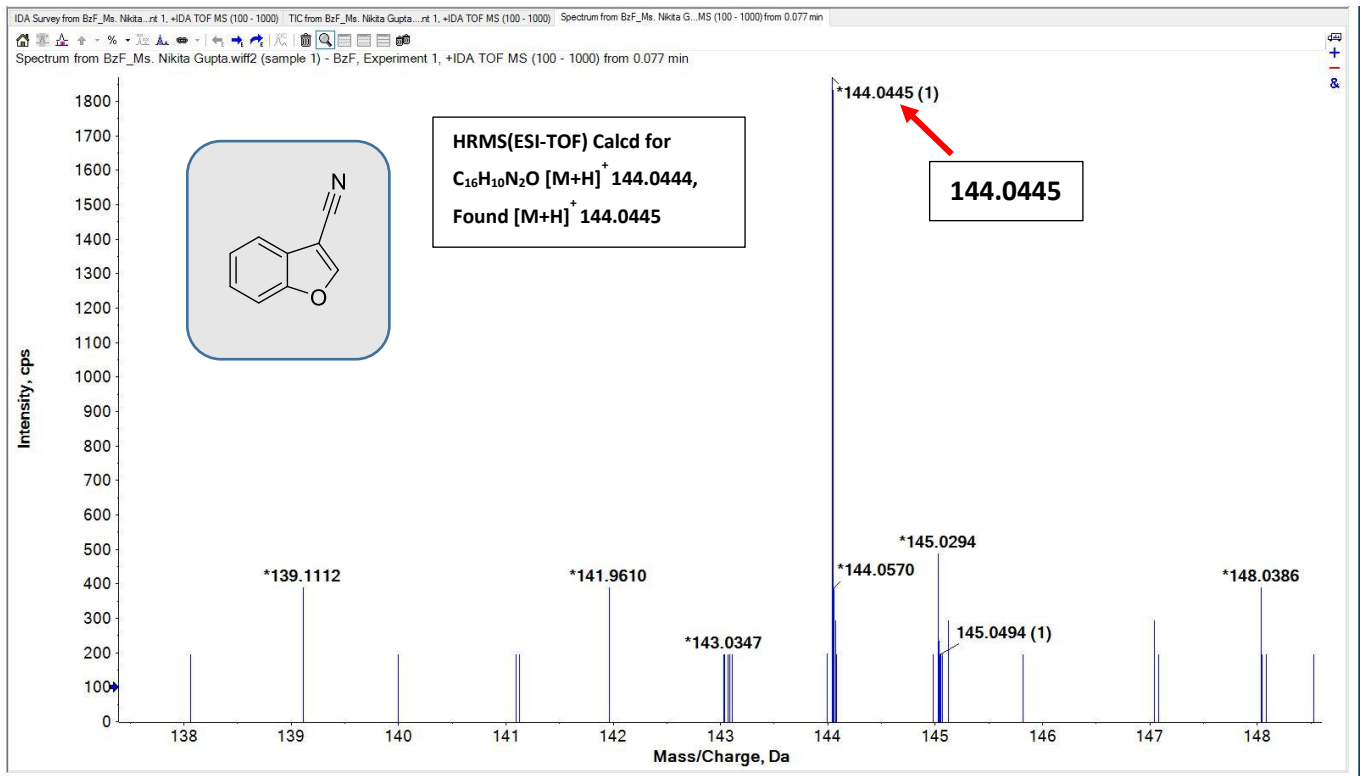

**benzo[b]thiophene-3-carbonitrile(3o)**

<sup>1</sup>H NMR (500 MHz, CDCl<sub>3</sub>)

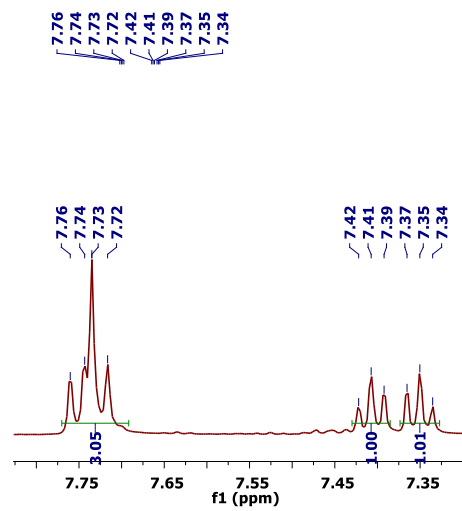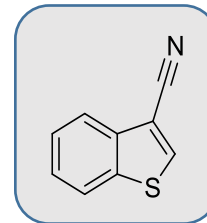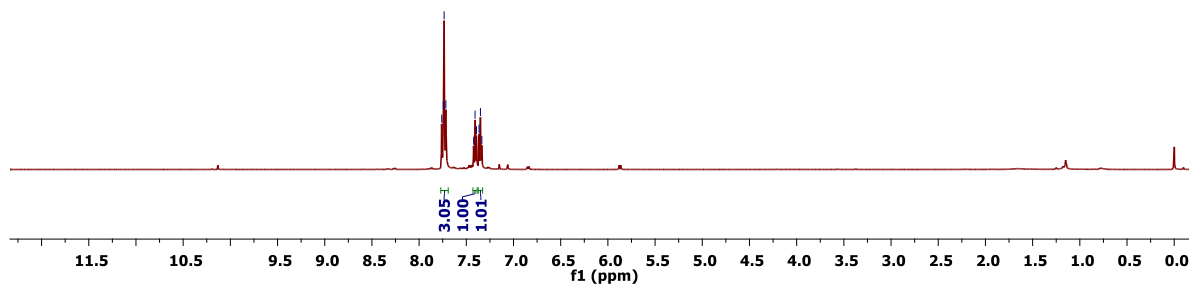

<sup>13</sup>CNMR (126 MHz, CDCl<sub>3</sub>)

— 140.05  
 — 136.23  
 — 133.76  
 — 126.67  
 — 124.53  
 — 124.06  
 — 121.14  
 — 113.23  
 — 108.43

— 76.17  
 — 75.92  
 — 75.66

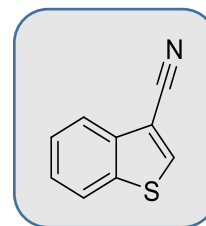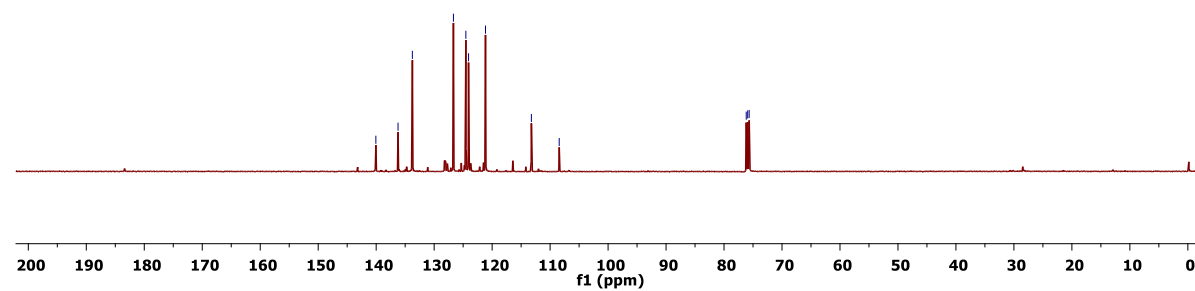

## HRMS-Spectra

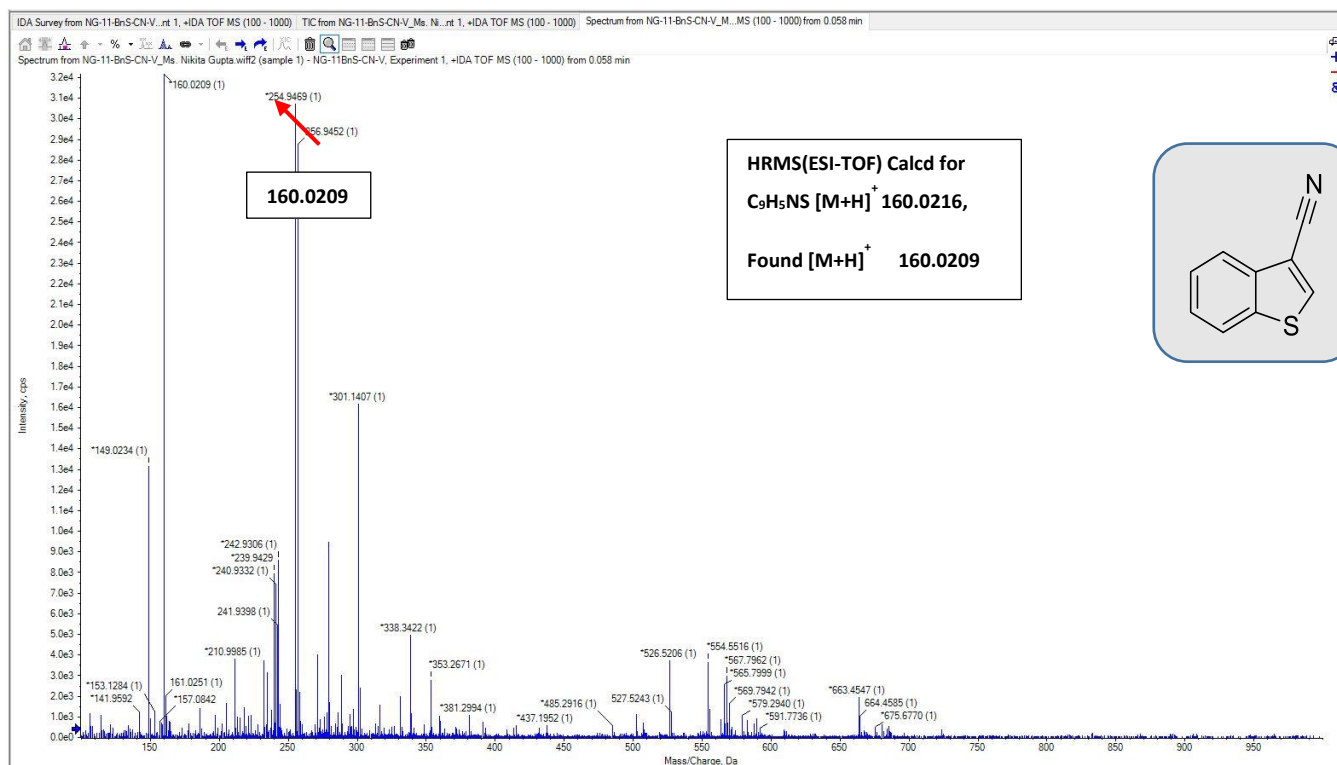

## 5-bromobenzo[b]thiophene-3-carbonitrile(3p)

**<sup>1</sup>H NMR (500 MHz, CDCl<sub>3</sub>)**

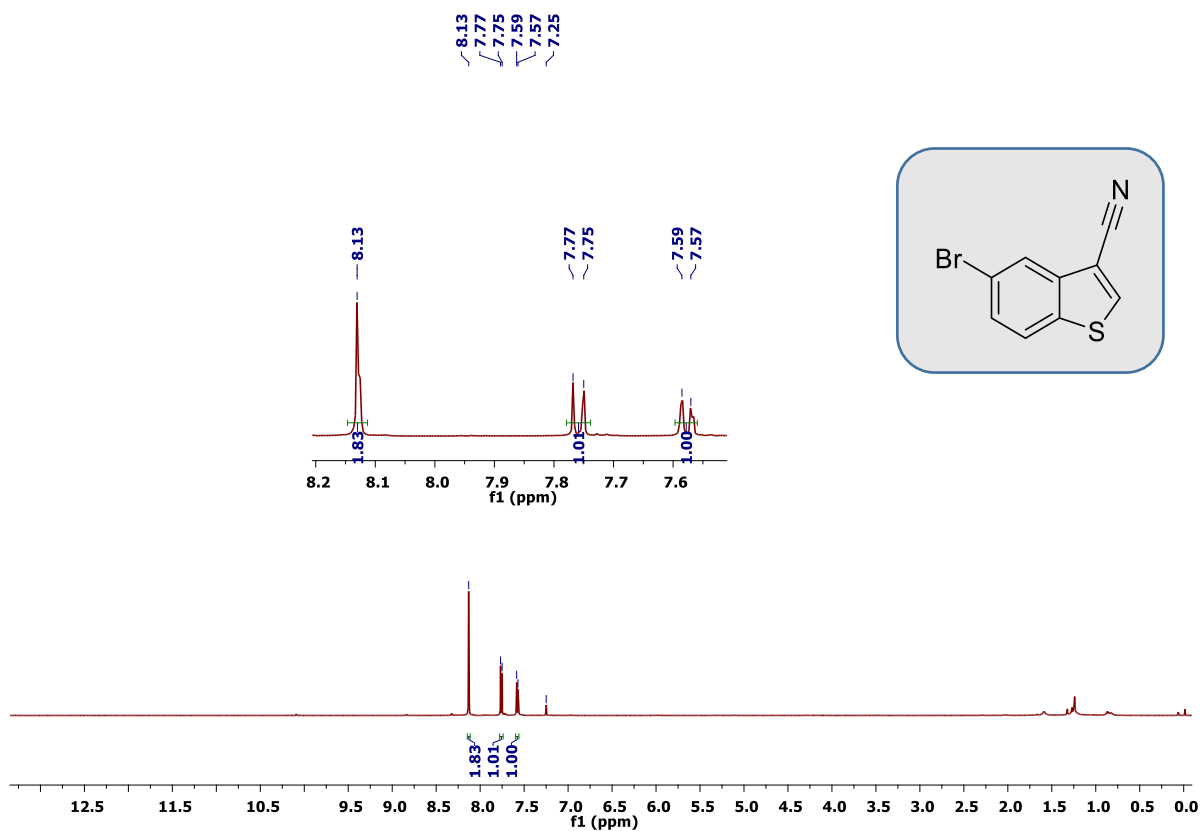

**<sup>13</sup>C NMR (126 MHz, CDCl<sub>3</sub>)**

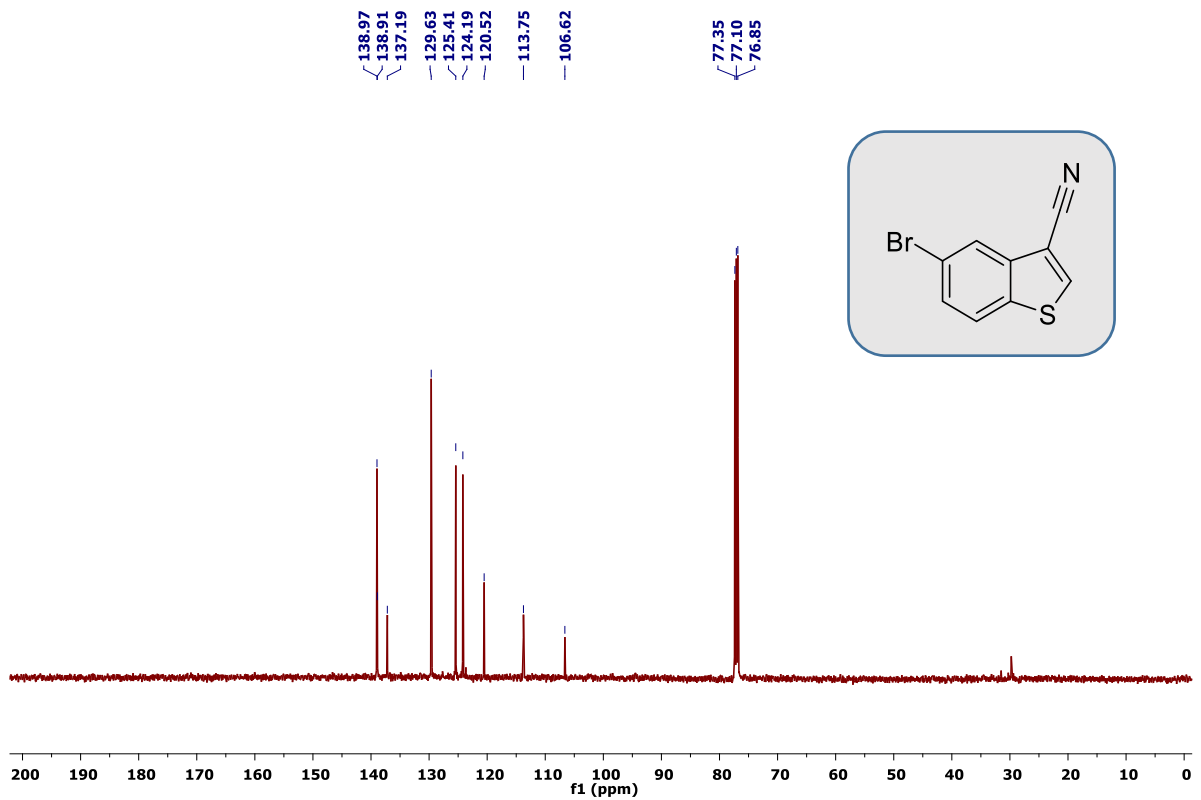

## HRMS-Spectra

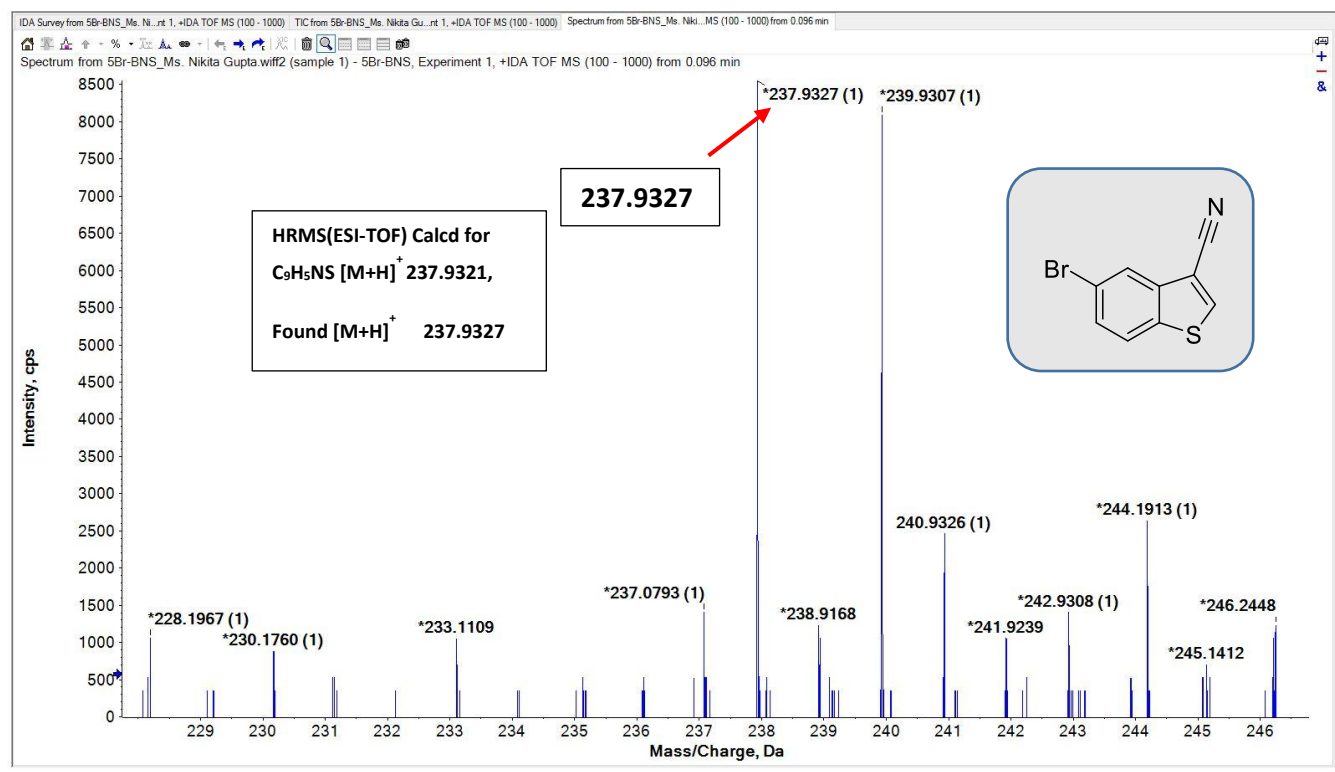

**1H-pyrrolo[2,3-b]pyridine-3-carbonitrile(3q)**

**<sup>1</sup>H NMR (500 MHz, DMSO-d<sub>6</sub>)**

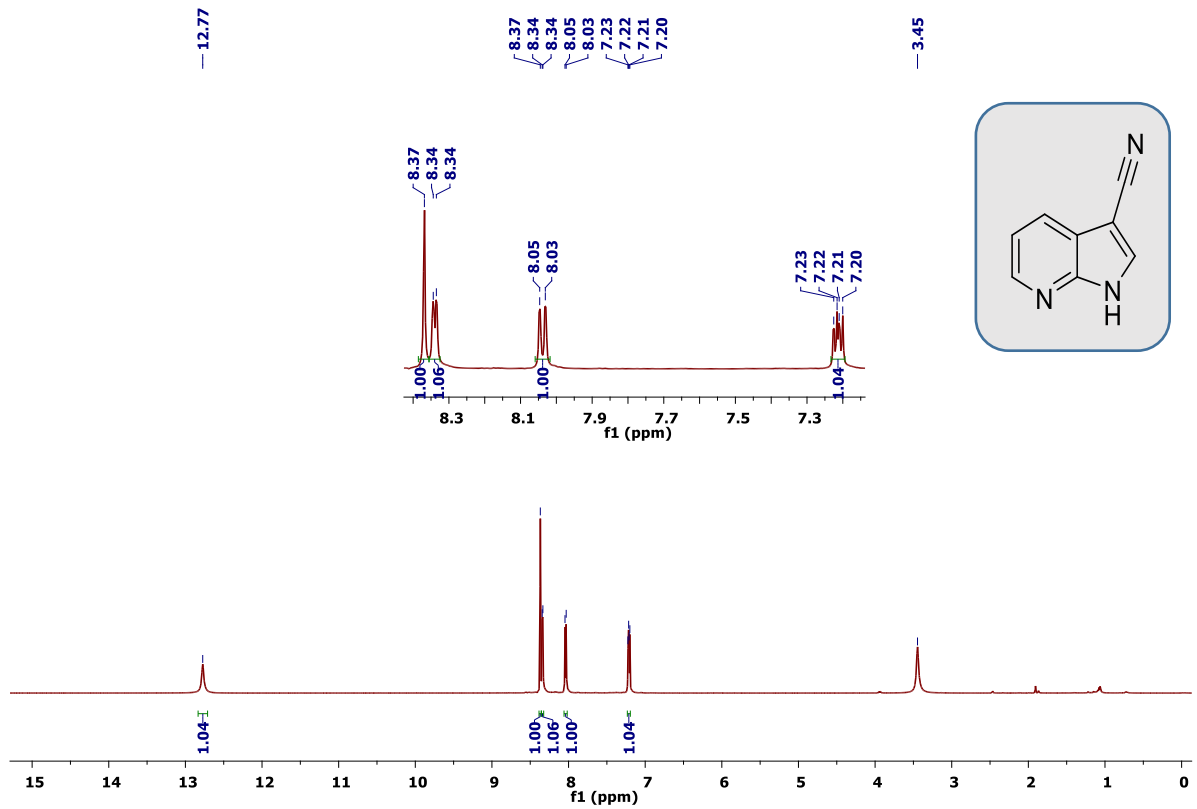

<sup>13</sup>C NMR (126 MHz, DMSO-d6)

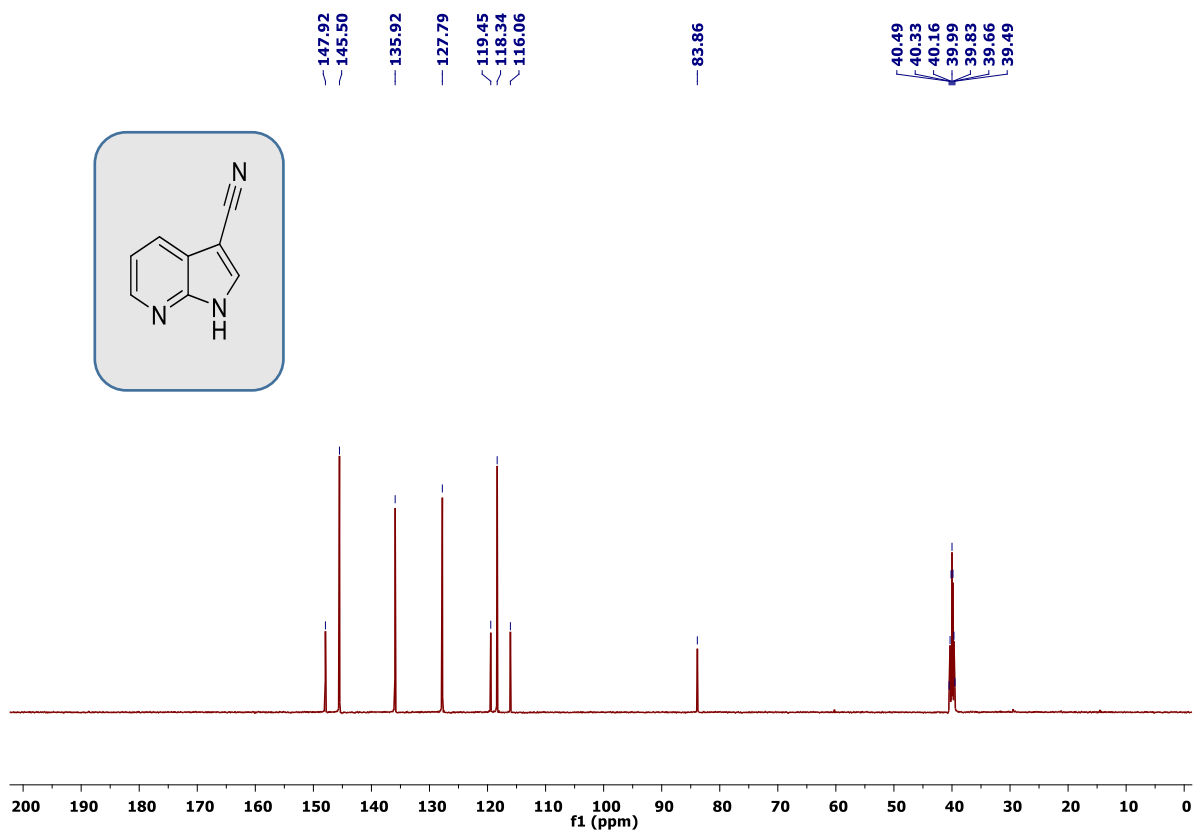

## HRMS-Spectra

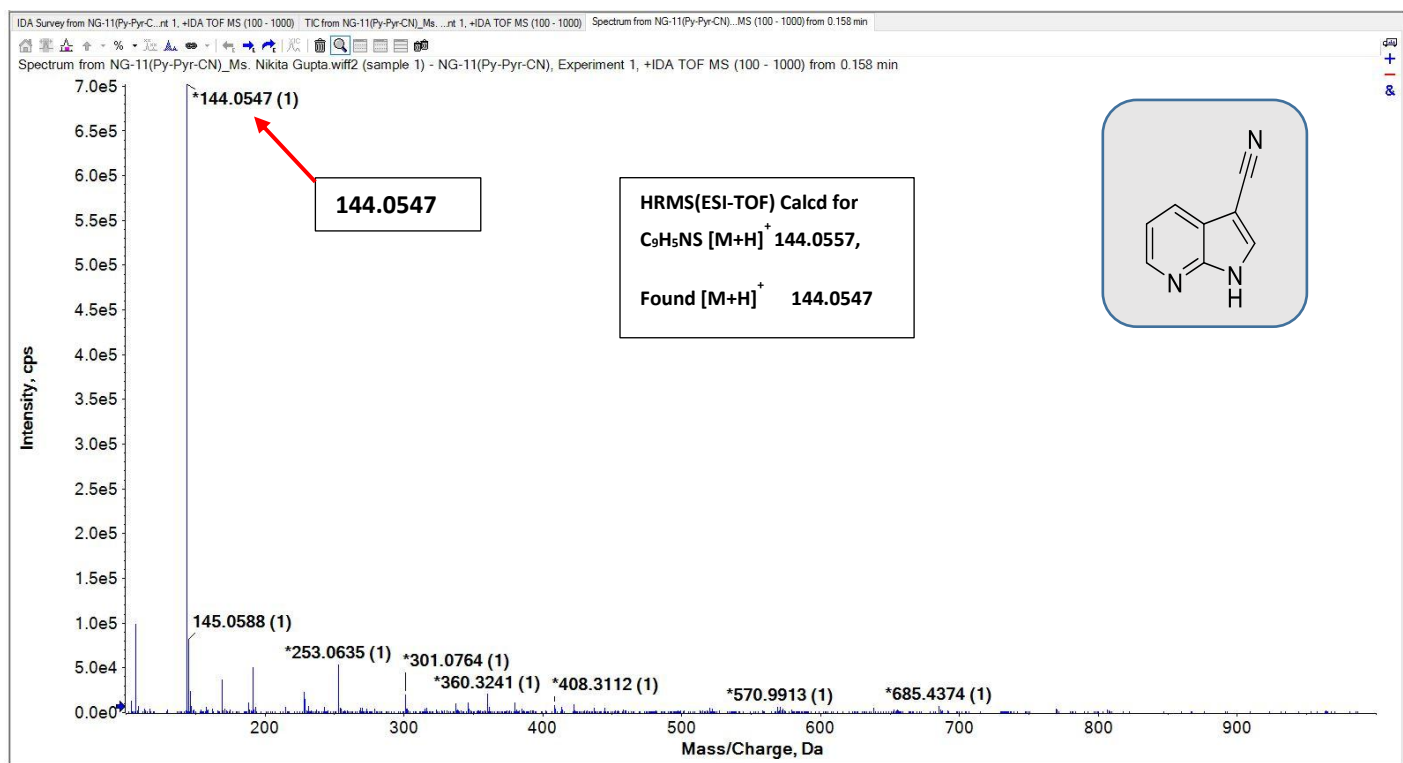

### 1-benzyl-1H-pyrrolo[2,3-b]pyridine-3-carbonitrile(3r)

$^1H$  NMR (500 MHz,  $CDCl_3$ )

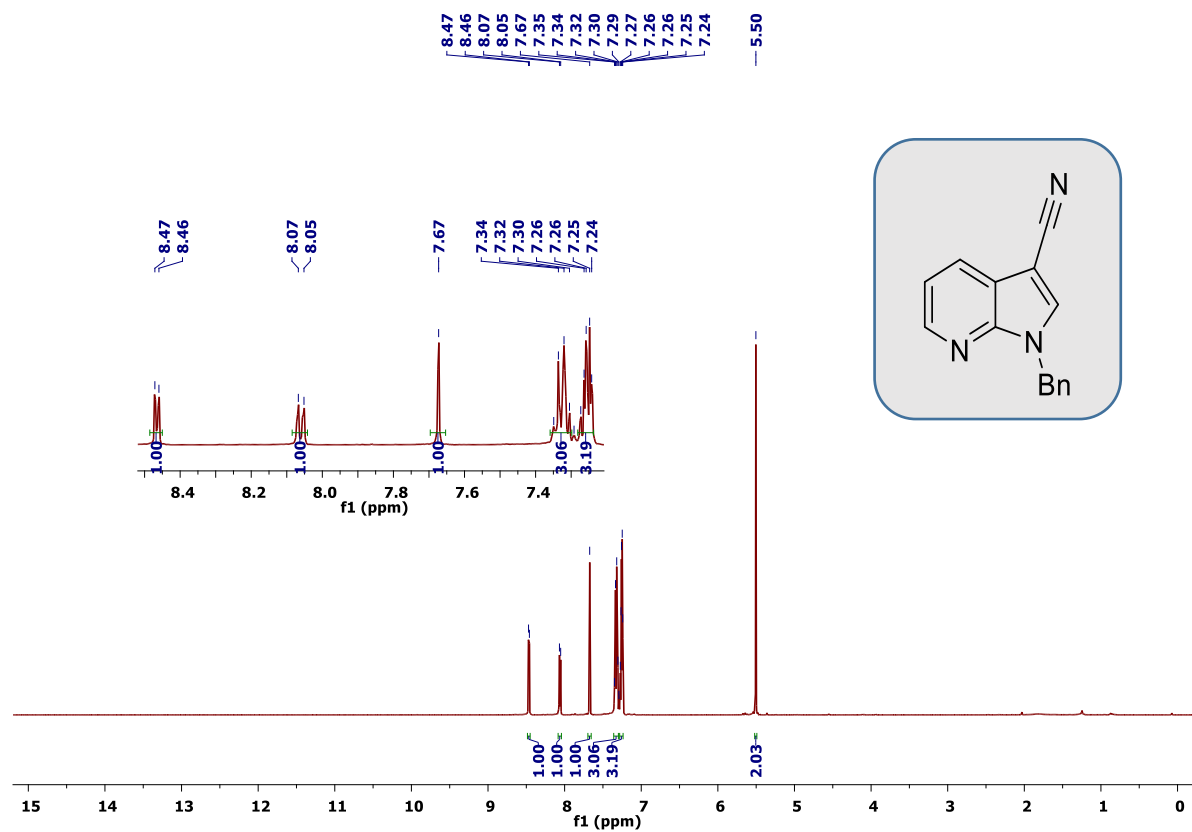

**<sup>13</sup>C NMR (126 MHz, CDCl<sub>3</sub>)**

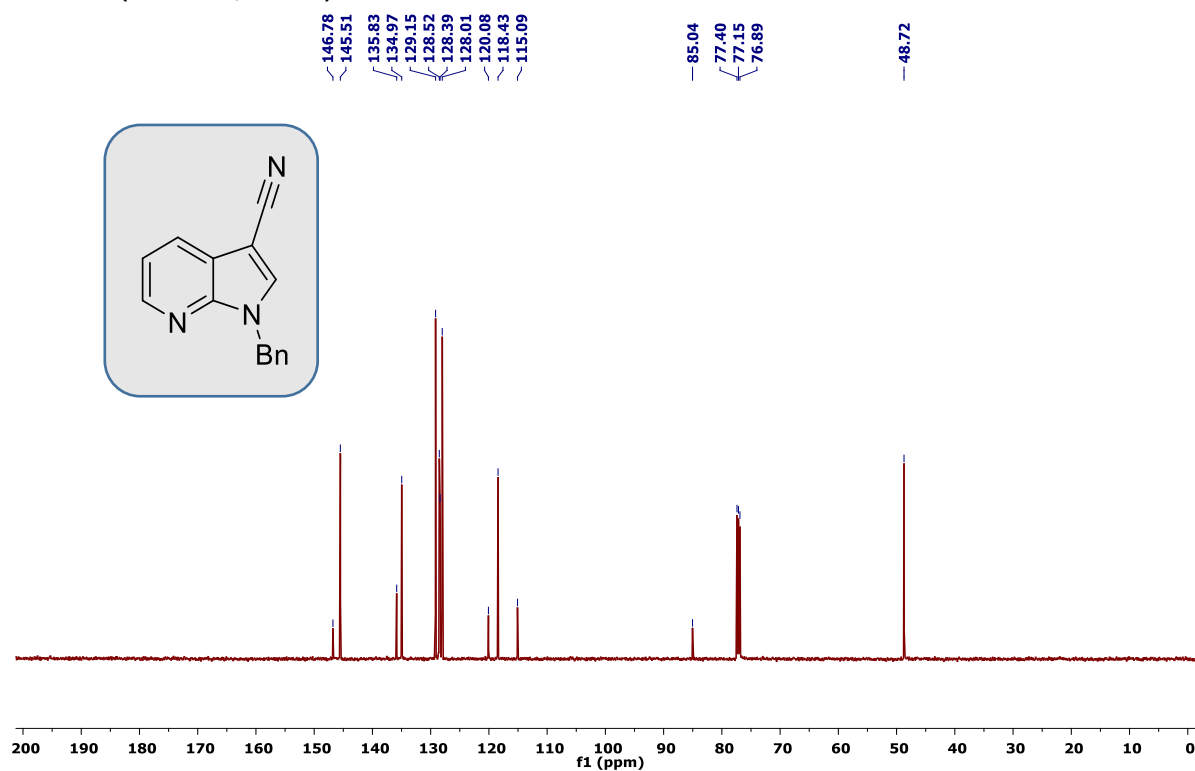

## HRMS-Spectra

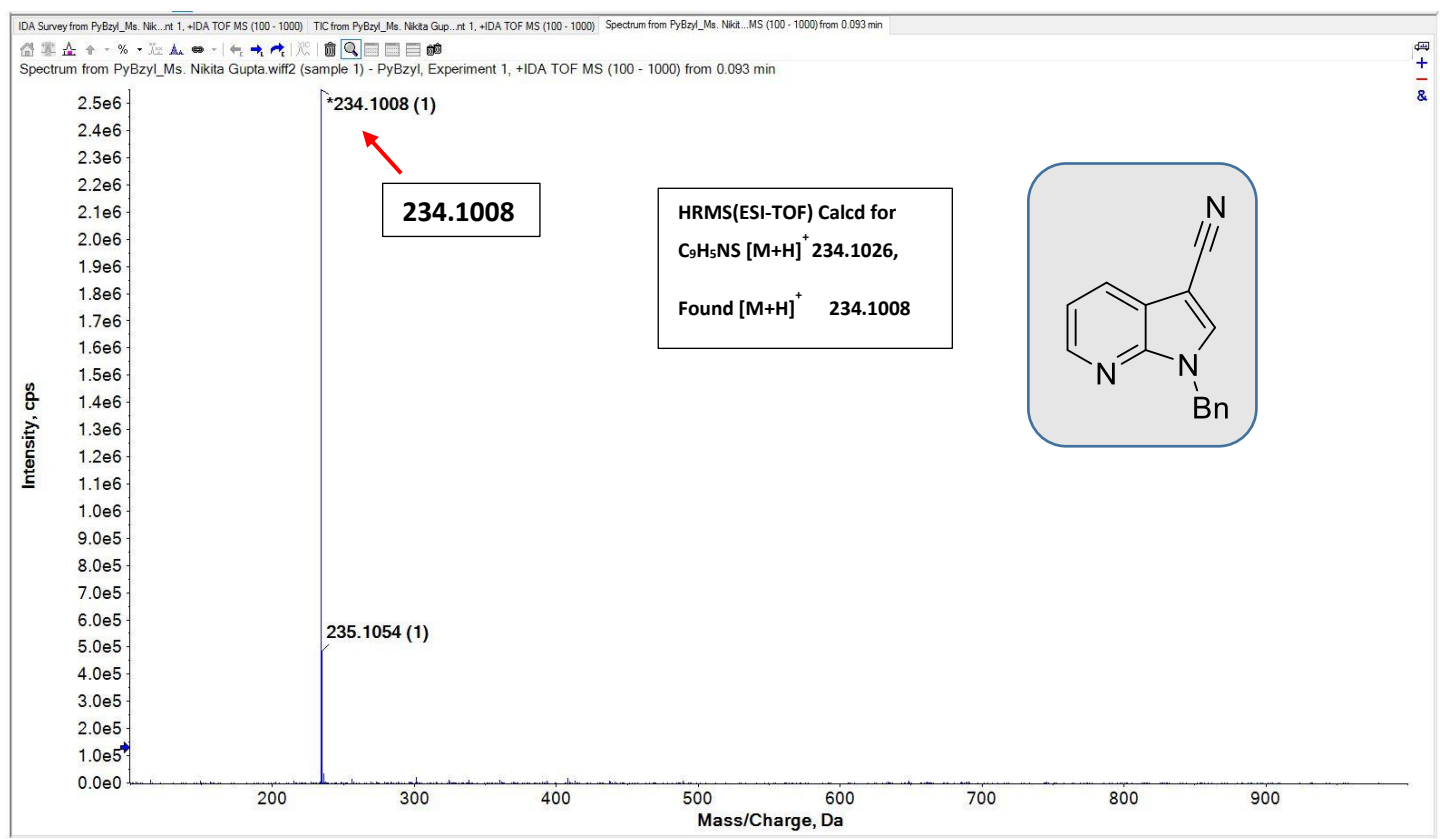

15. NMR Spectra of starting material Oxime  
5-methoxy-1H-indole-3-carbaldehyde oxime(1b)

<sup>1</sup>H NMR (500 MHz, DMSO-d6)

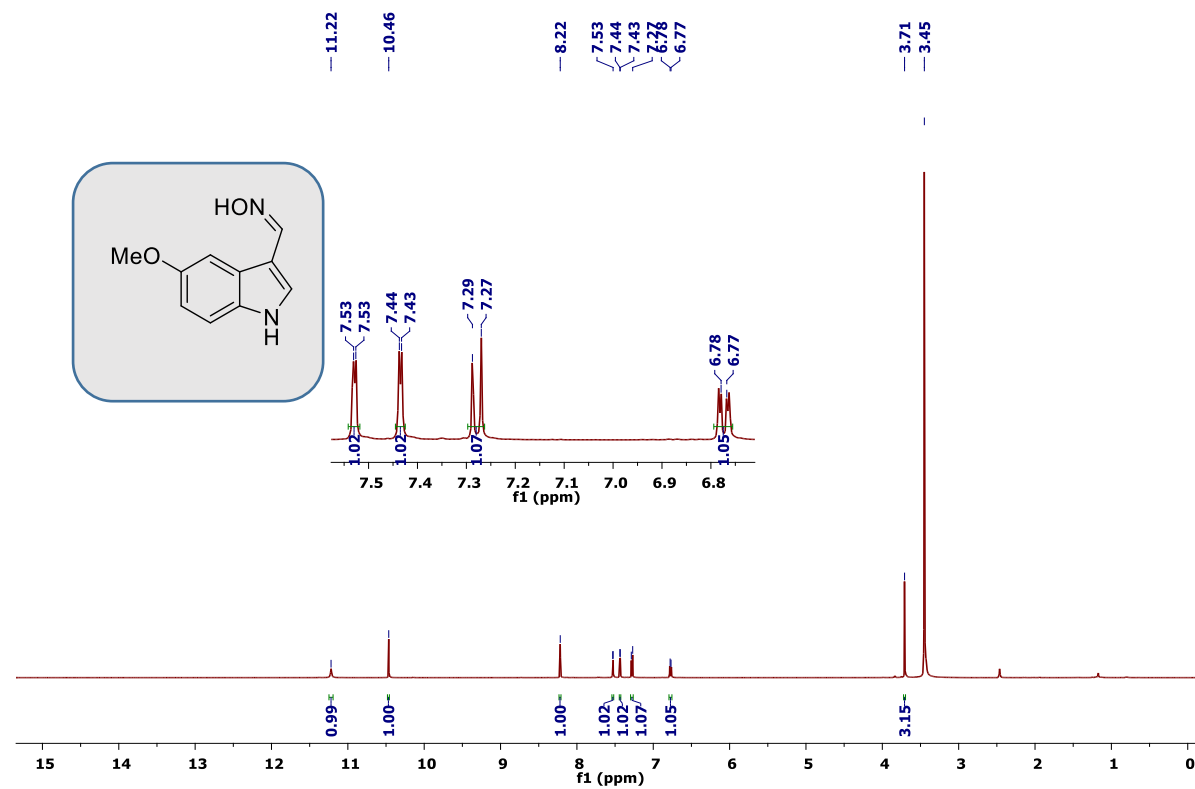

<sup>13</sup>C NMR (126 MHz, DMSO-d6)

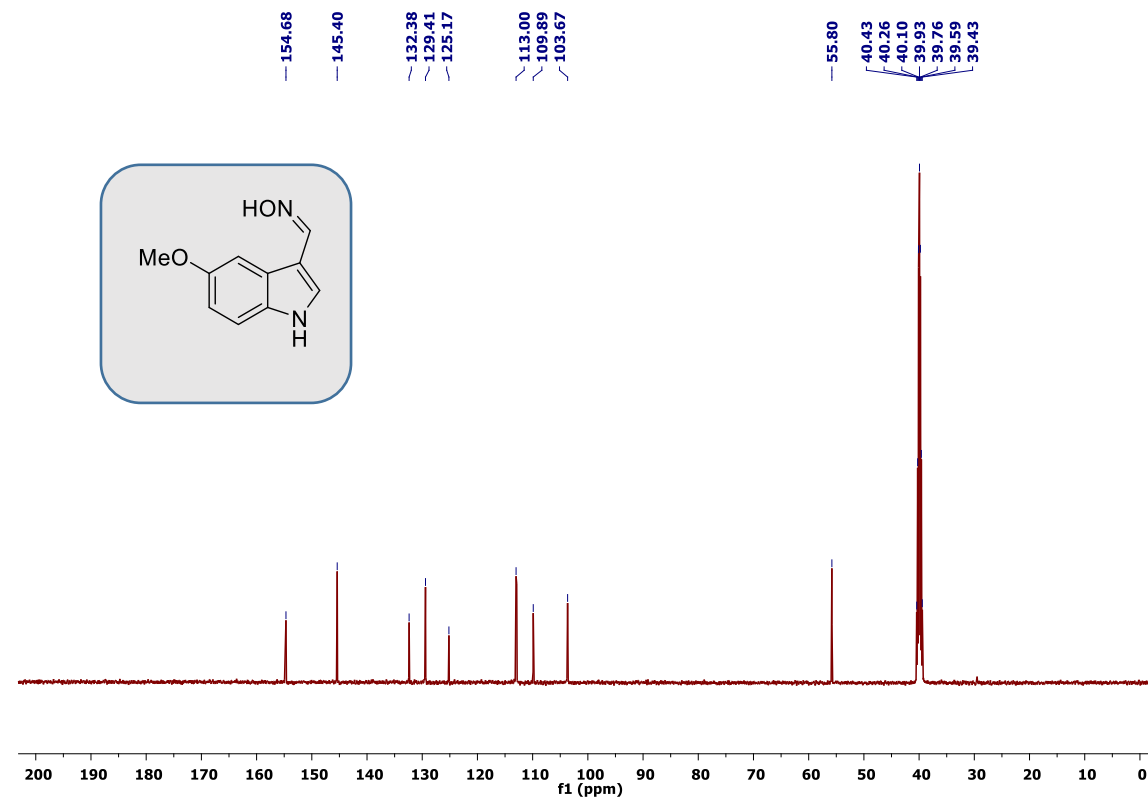

### 5-methyl-1H-indole-3-carbaldehyde oxime(1c)

<sup>1</sup>H NMR (500 MHz, DMSO-d6)

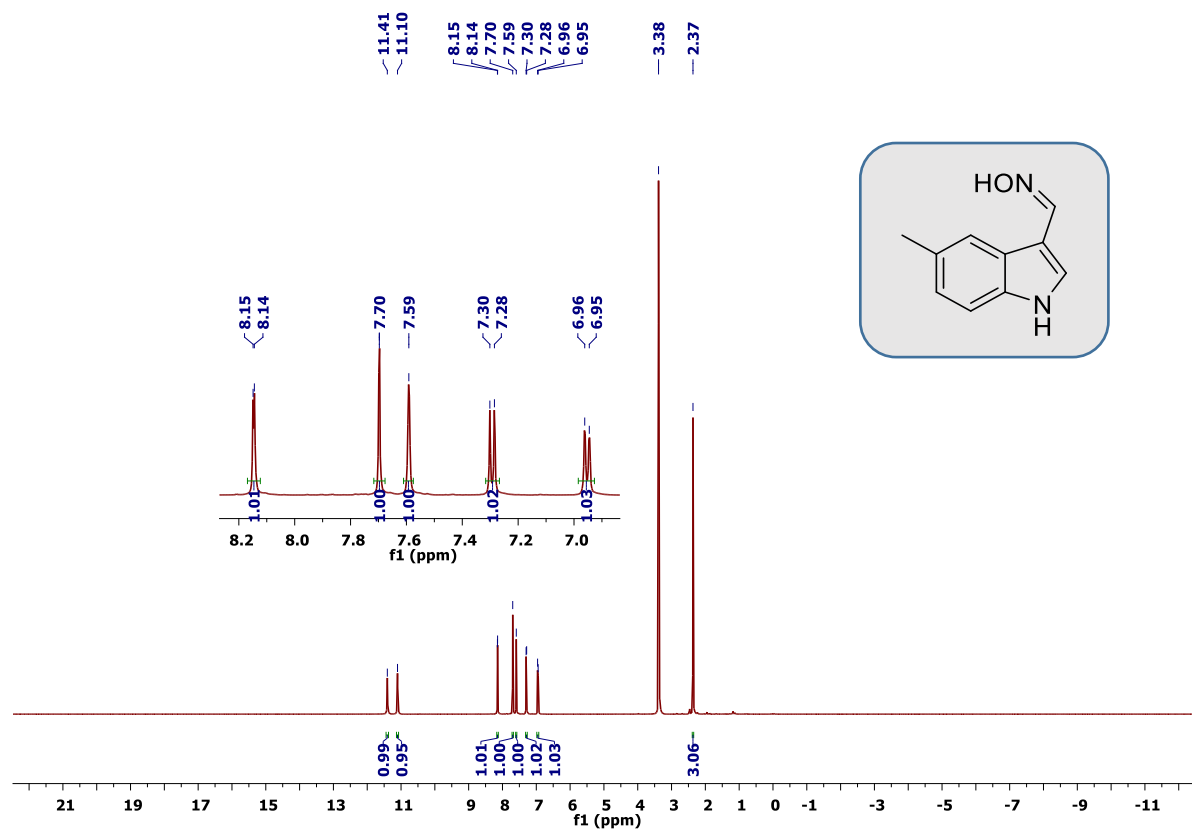

<sup>13</sup>C NMR (126 MHz, DMSO-d6)

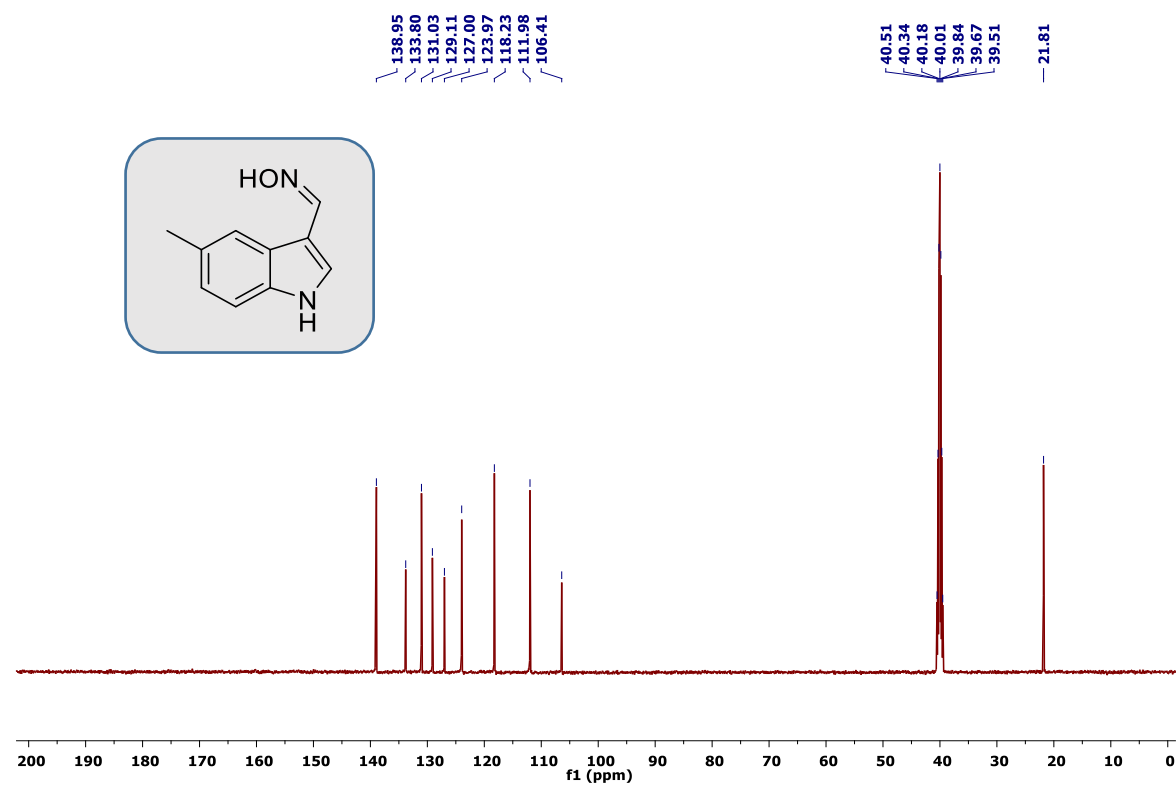

**5-chloro-1H-indole-3-carbaldehyde oxime(1d)**

<sup>1</sup>H NMR (500 MHz, DMSO-d<sub>6</sub>)

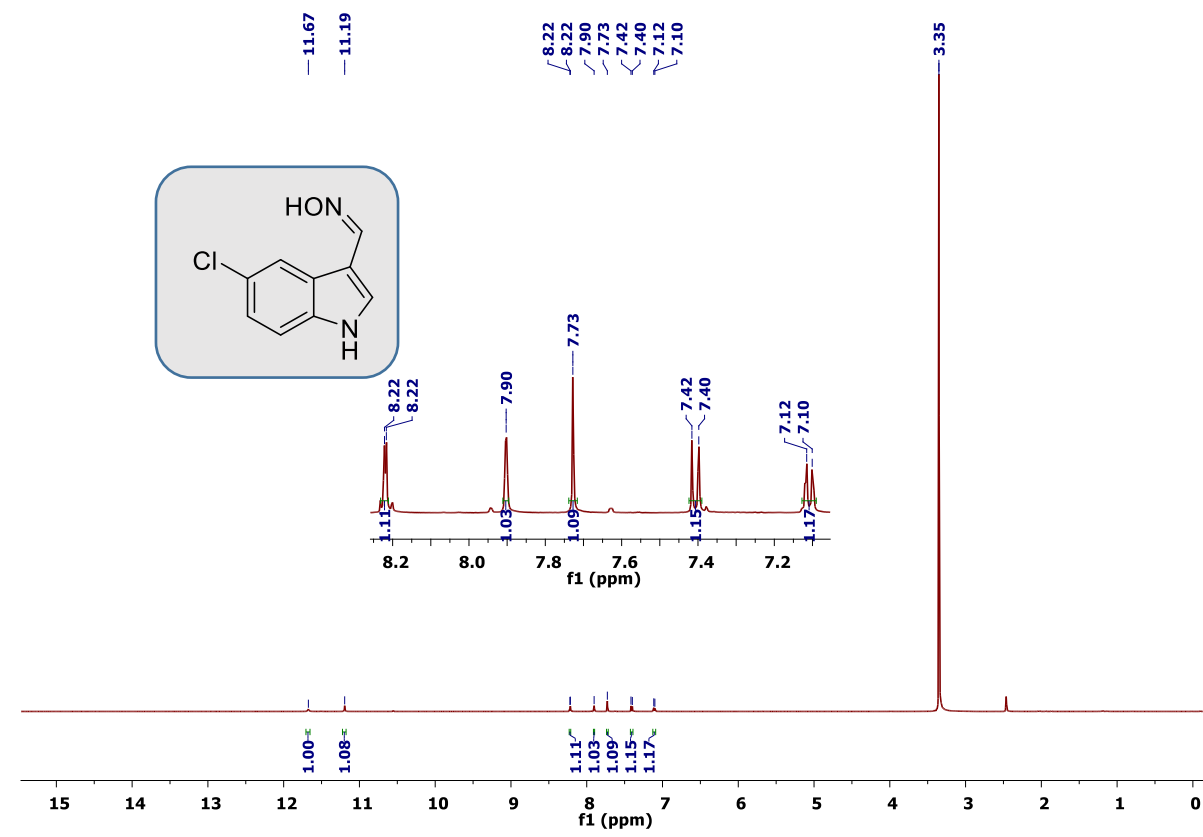

<sup>13</sup>C NMR (126 MHz, DMSO-d<sub>6</sub>)

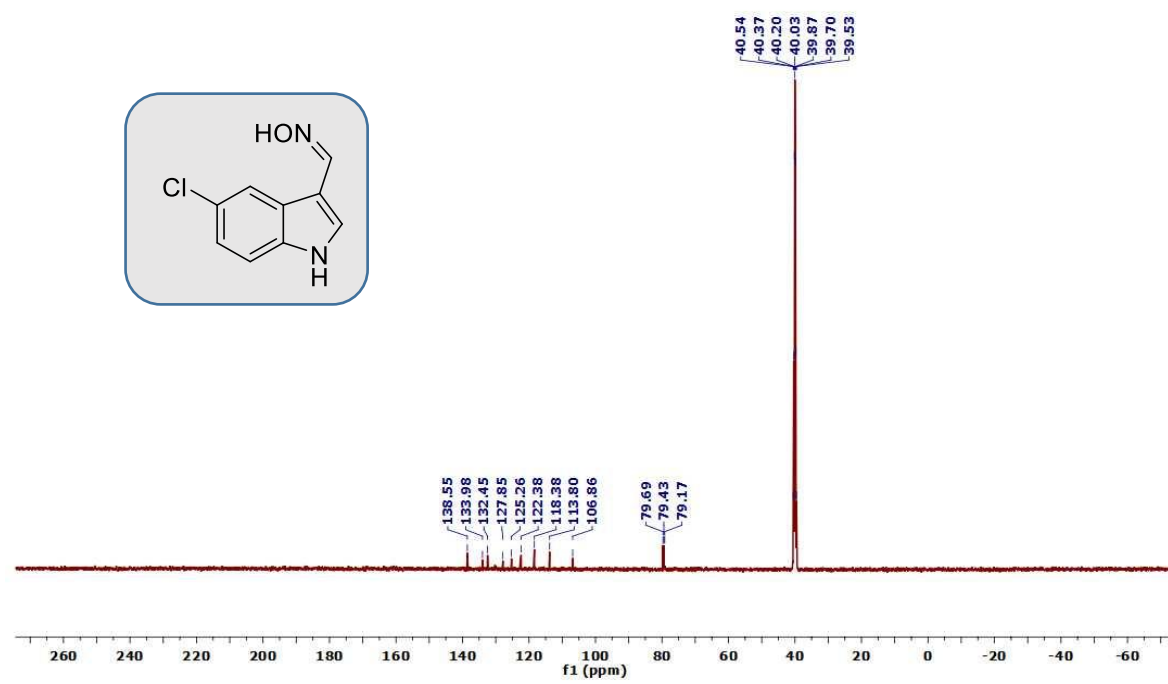

### 5-nitro-1H-indole-3-carbaldehyde oxime(1e)

<sup>1</sup>H NMR (500 MHz, DMSO-d6)

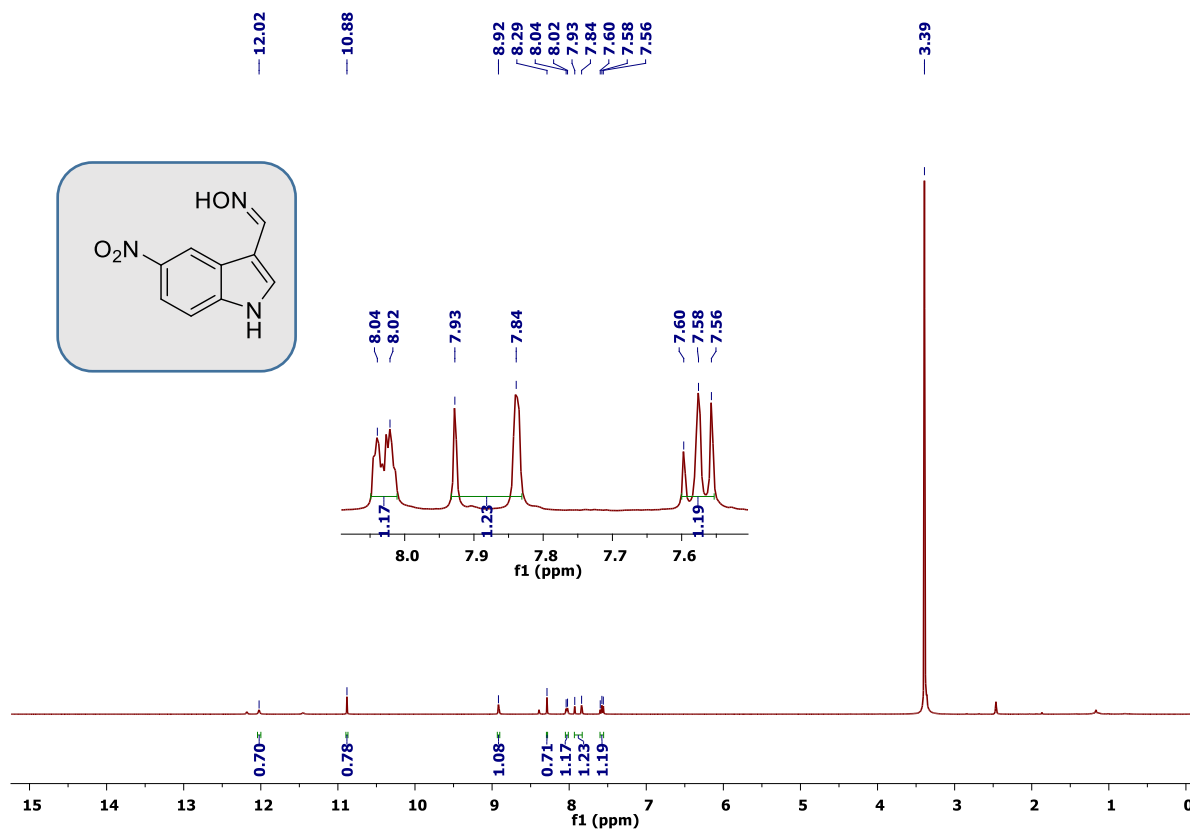

<sup>13</sup>C NMR (126 MHz, DMSO-d6)

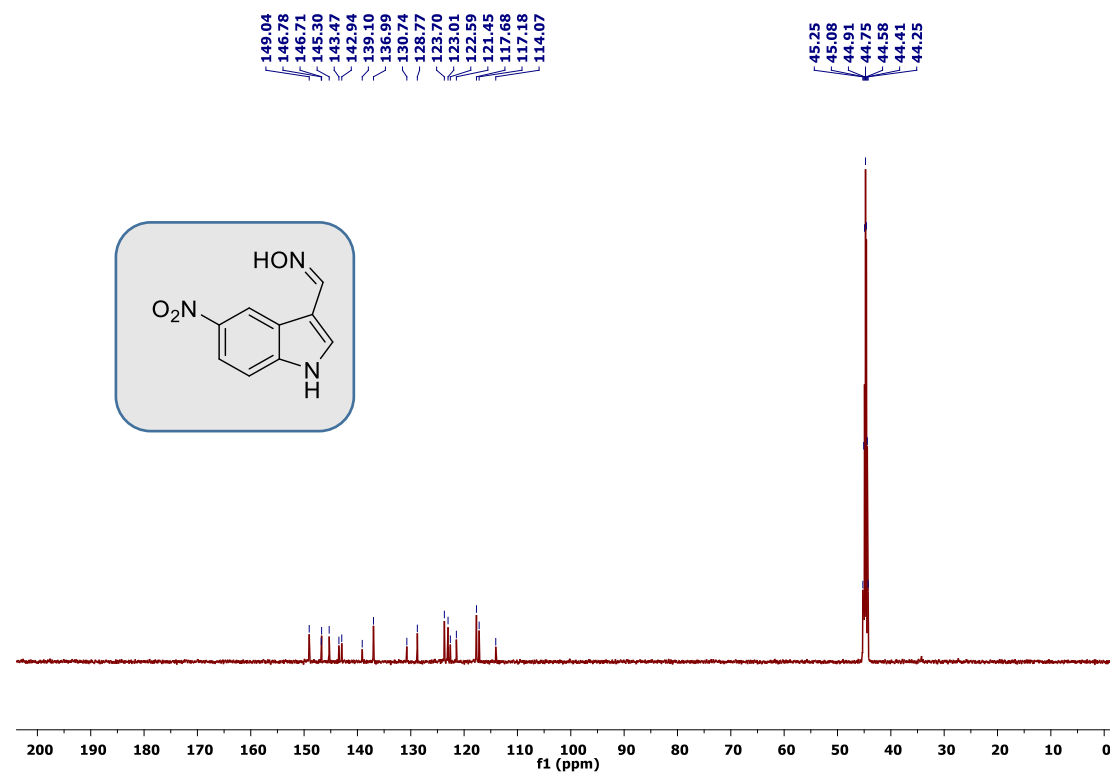

**3-((hydroxyimino)methyl)-1H-indole-5-carbonitrile(1f)**  
**<sup>1</sup>H NMR (500 MHz, DMSO-d6)**

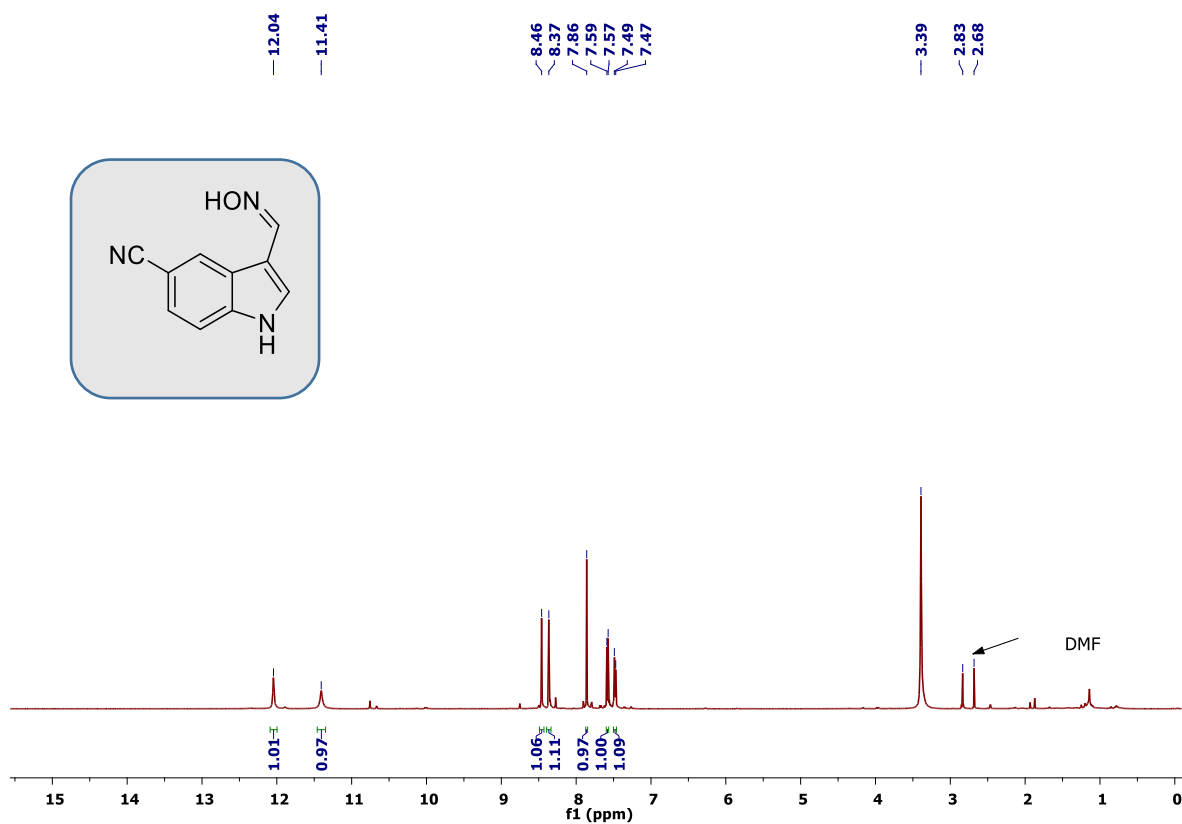

**<sup>13</sup>C NMR (126 MHz, DMSO-d6)**

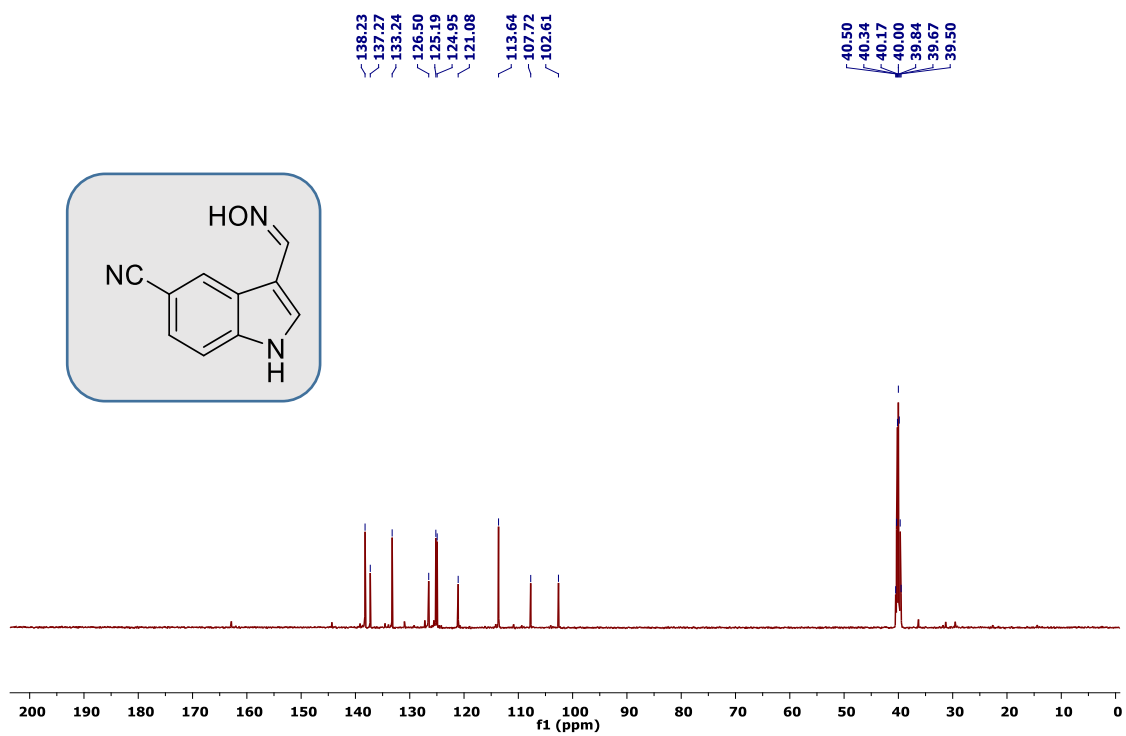

**2-(4-chlorophenyl)-1H-indole-3-carbaldehyde oxime(1h)**  
**<sup>1</sup>H NMR (500 MHz, DMSO-d6)**

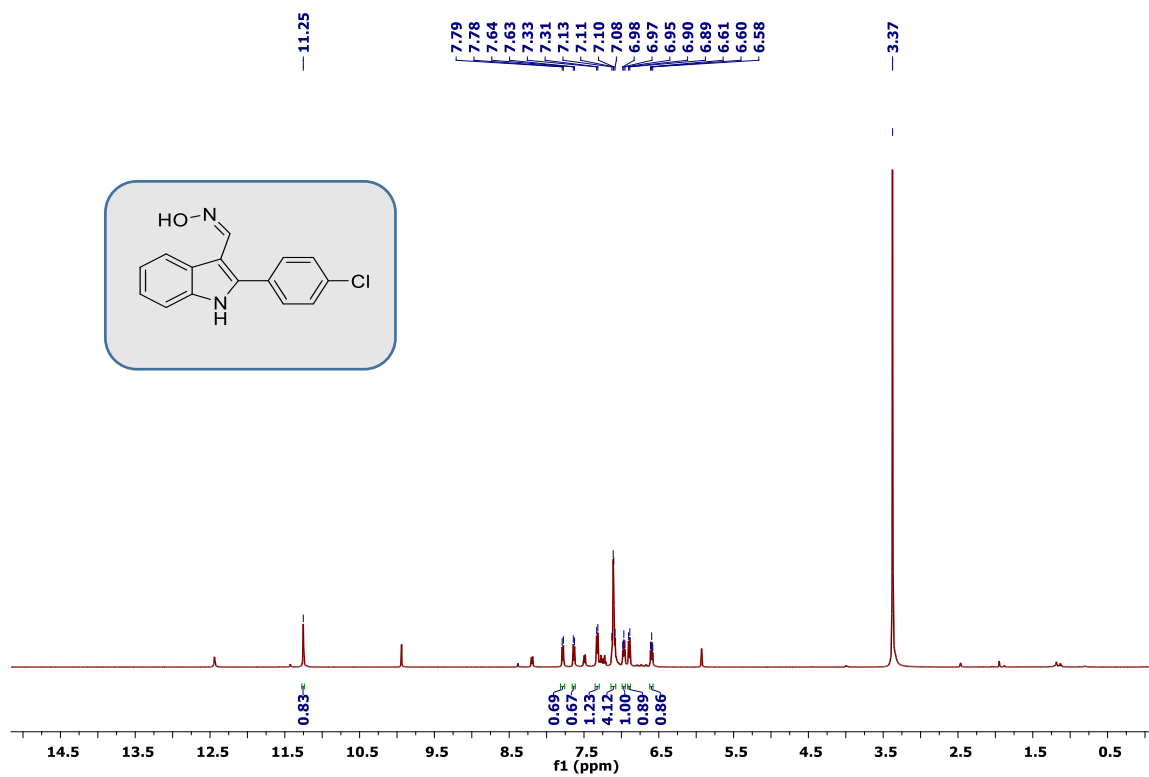

**<sup>13</sup>C NMR (126 MHz, DMSO-d6)**

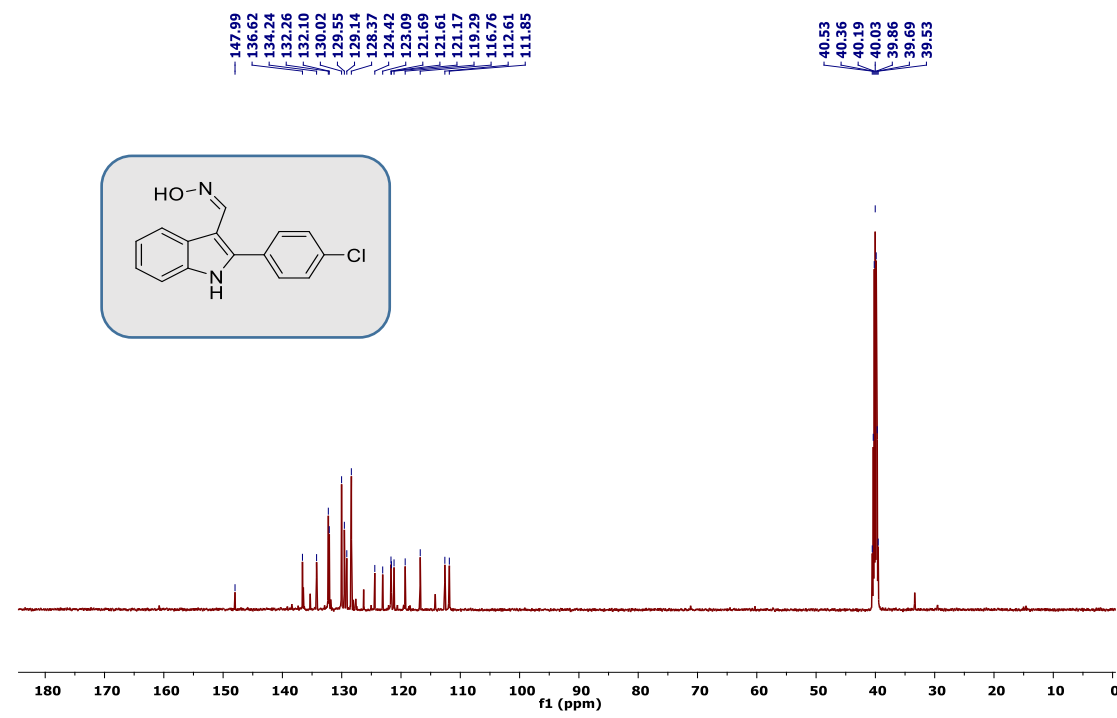

# 1-methyl-1H-indole-3-carbaldehyde oxime(1i)

<sup>1</sup>H NMR (500 MHz, CDCl<sub>3</sub>)

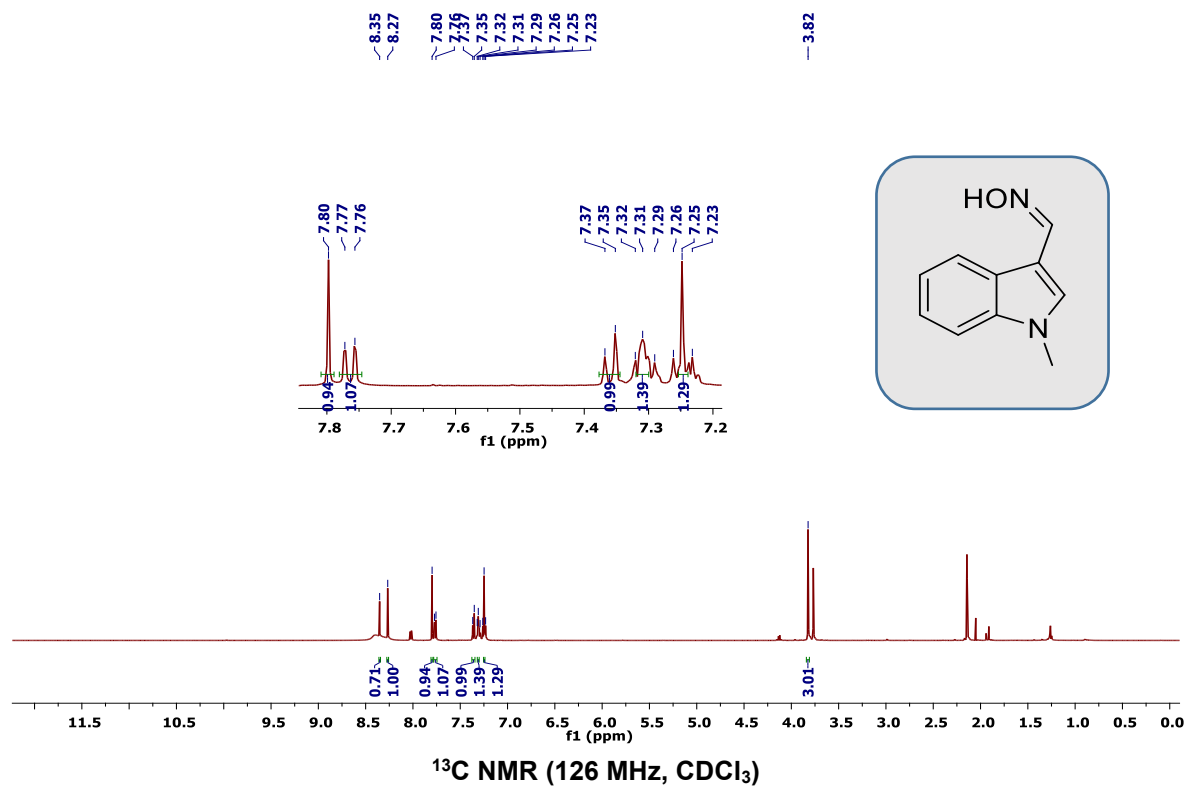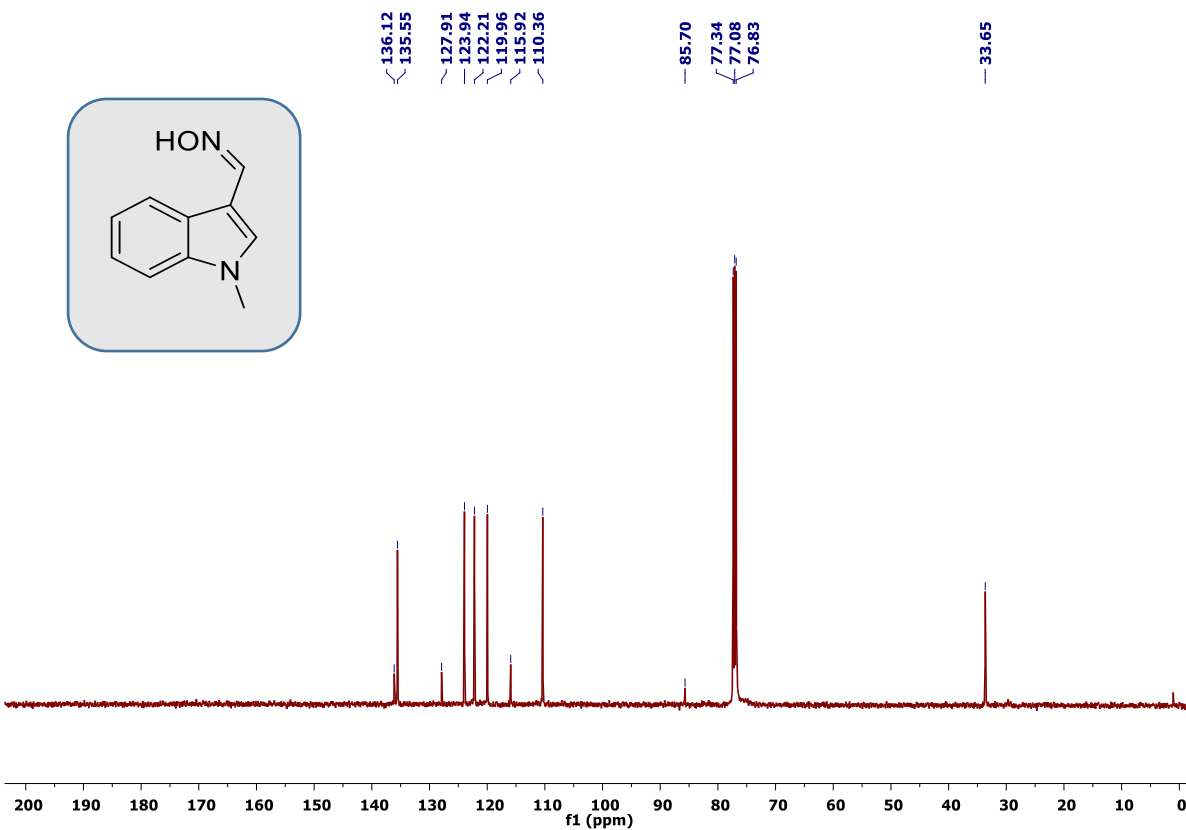

**1-methyl-2-phenyl-1H-indole-3-carbaldehyde oxime(1j)**

**<sup>1</sup>H NMR (500 MHz, DMSO-d6)**

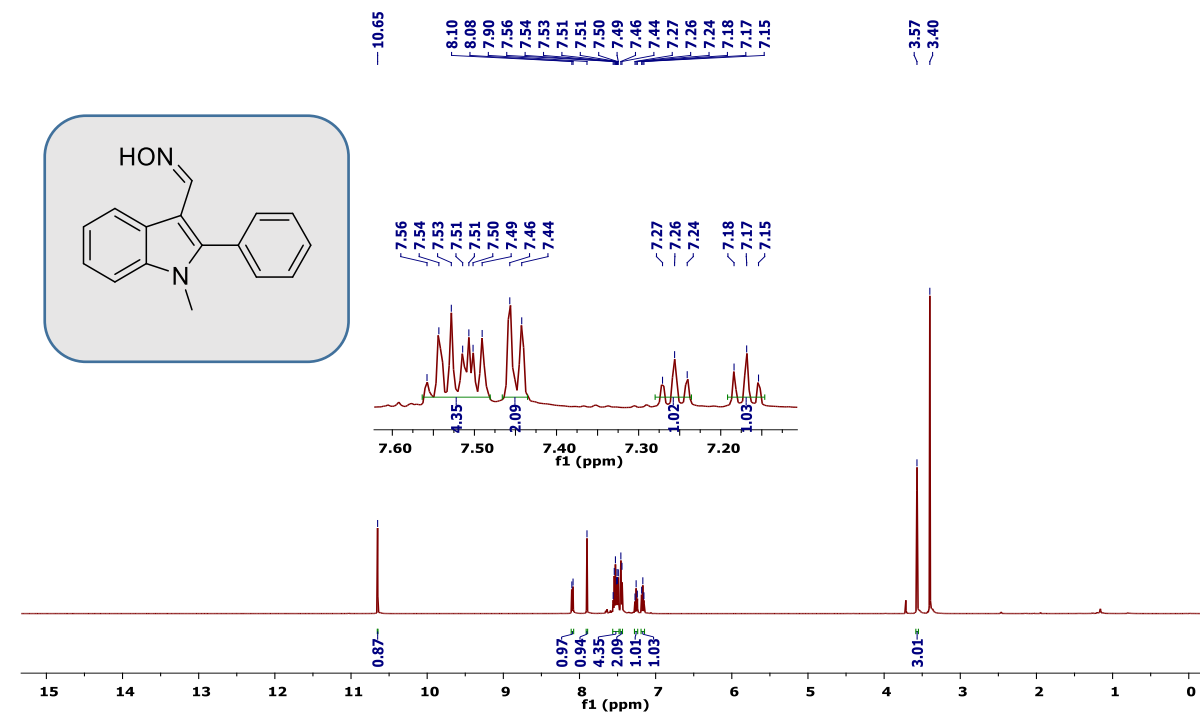

**<sup>13</sup>C NMR (126 MHz, DMSO-d6)**

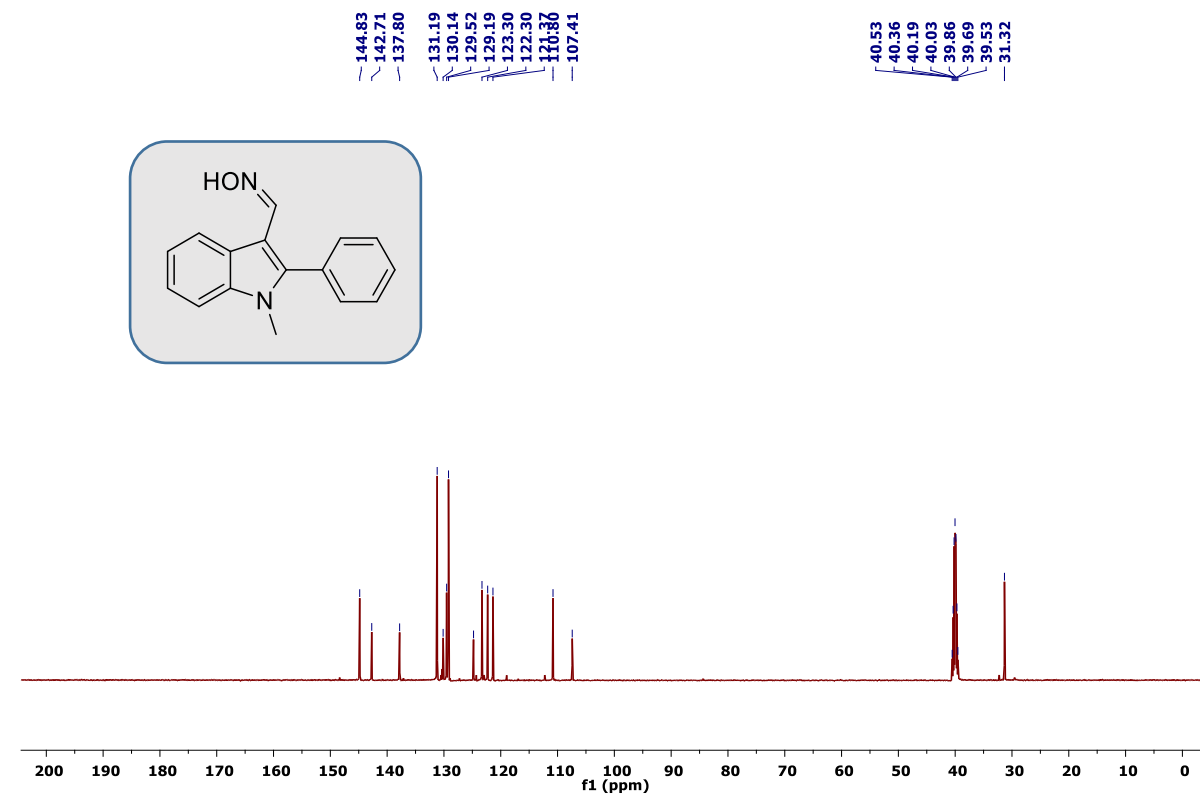

**1-benzyl-1H-indole-3-carbaldehyde oxime(1k)**

**<sup>1</sup>H NMR (500 MHz, DMSO-d6)**

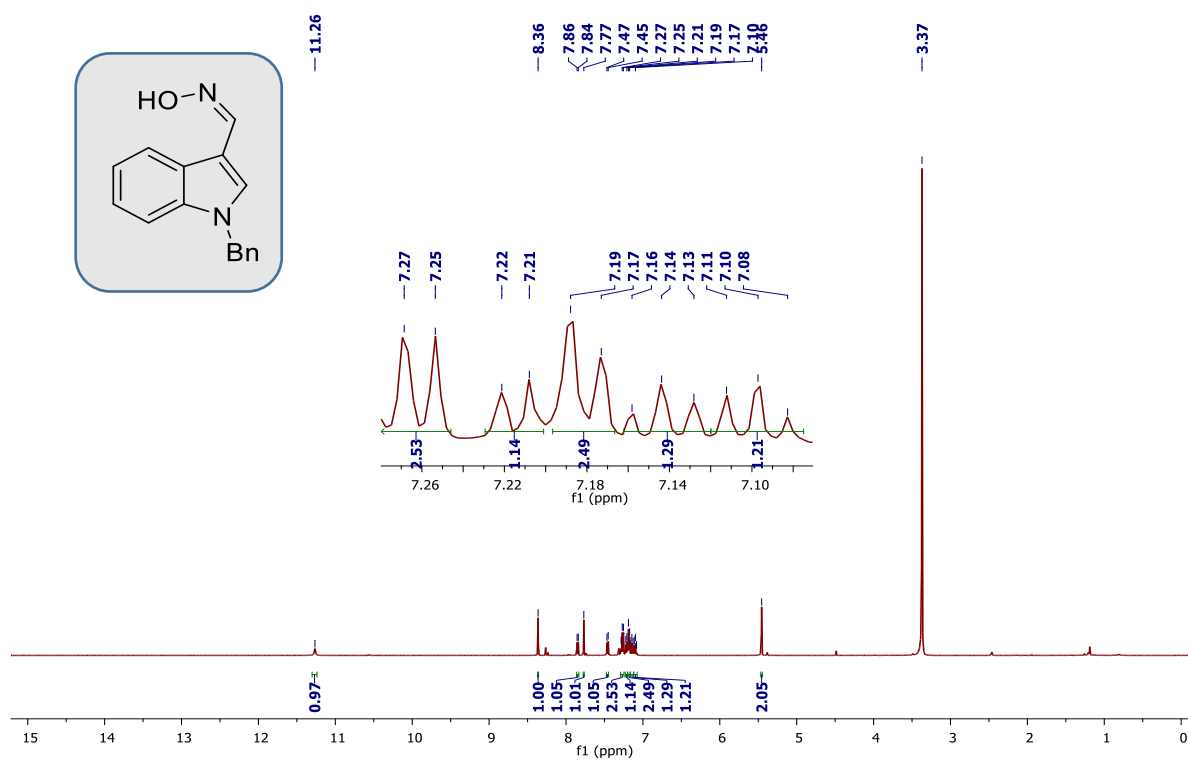

**<sup>13</sup>C NMR (126 MHz, DMSO-d6)**

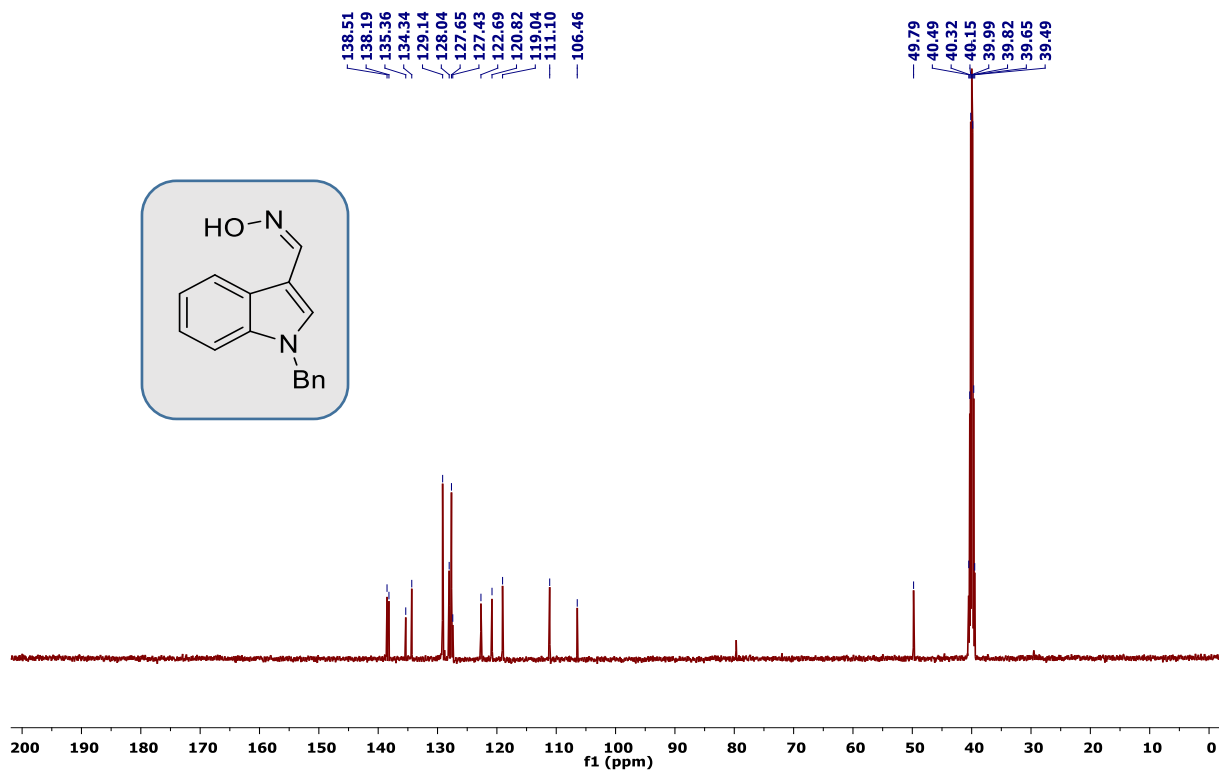

**1-benzyl-5-chloro-1H-indole-3-carbaldehyde oxime(1)**

<sup>1</sup>H NMR (500 MHz, CDCl<sub>3</sub>)

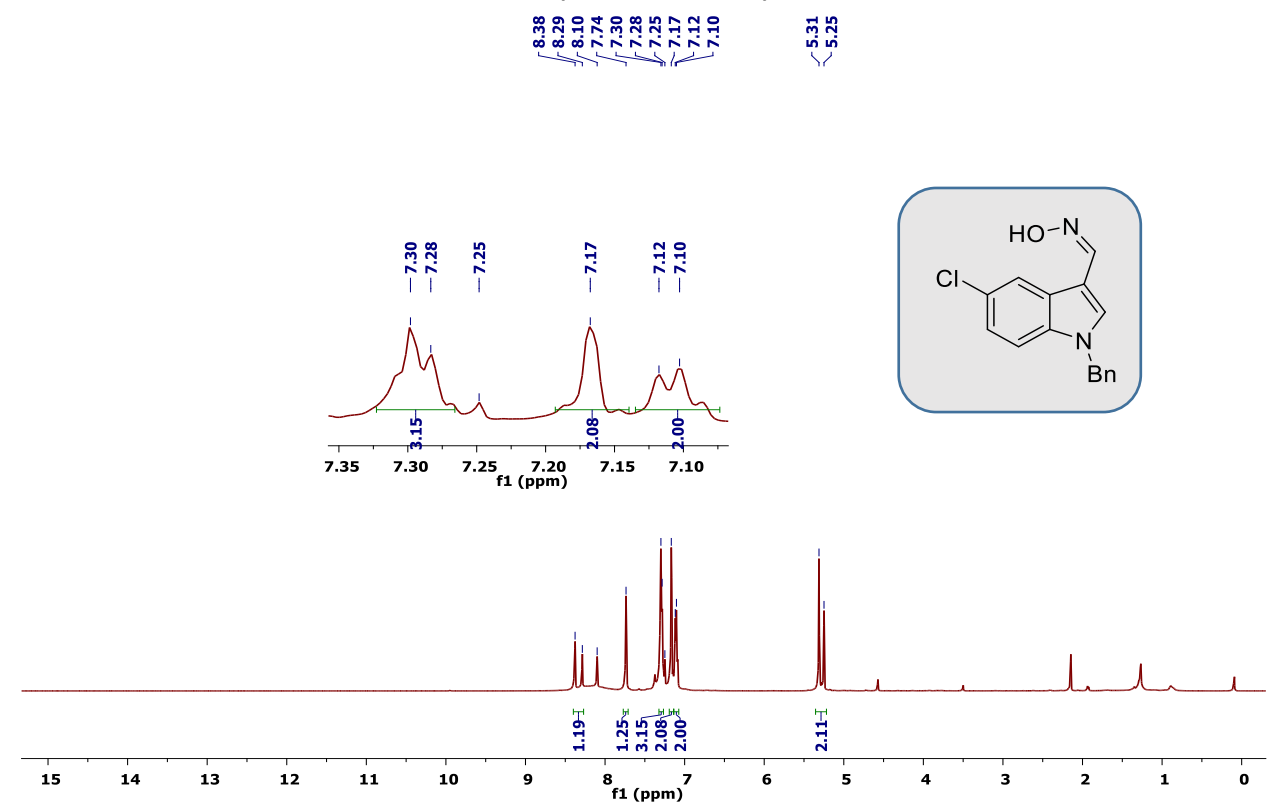

**<sup>13</sup>C NMR (126MHz, CDCl<sub>3</sub>)**

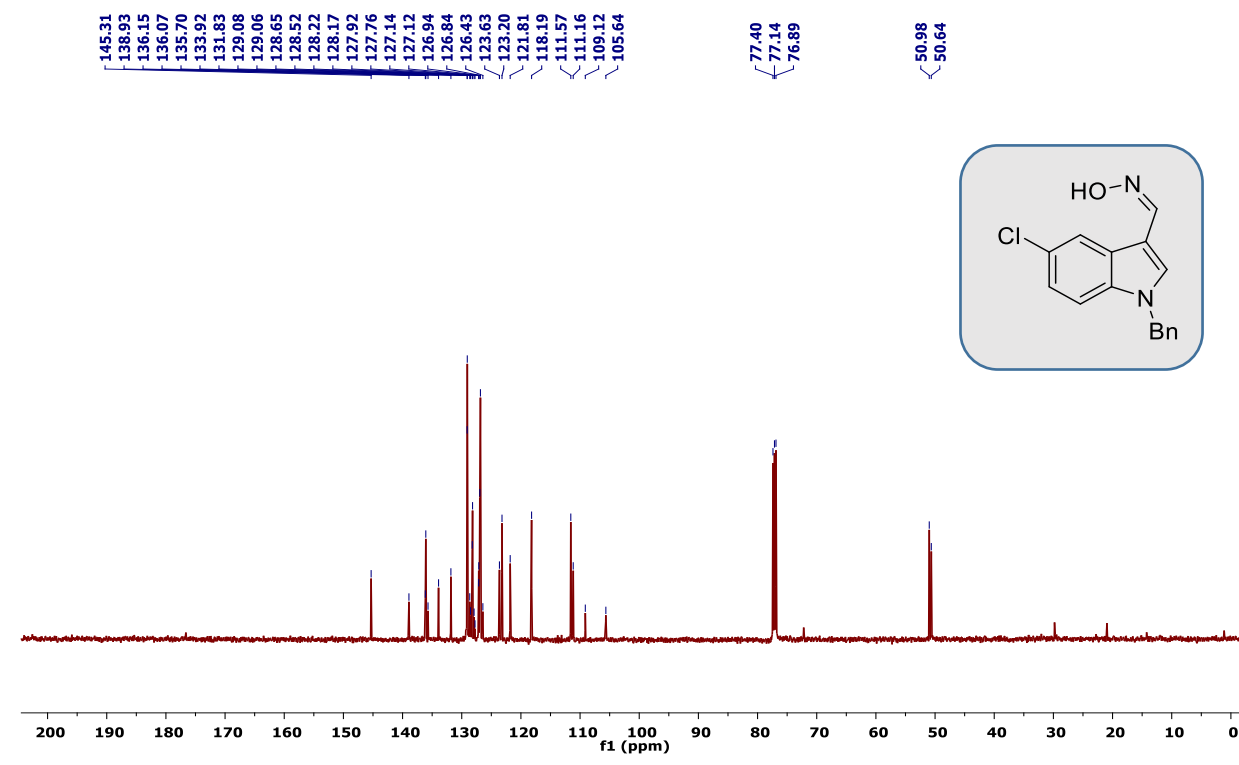

**1-tosyl-1H-indole-3-carbaldehyde oxime(1n)**

**<sup>1</sup>H NMR (500 MHz, DMSO-d6)**

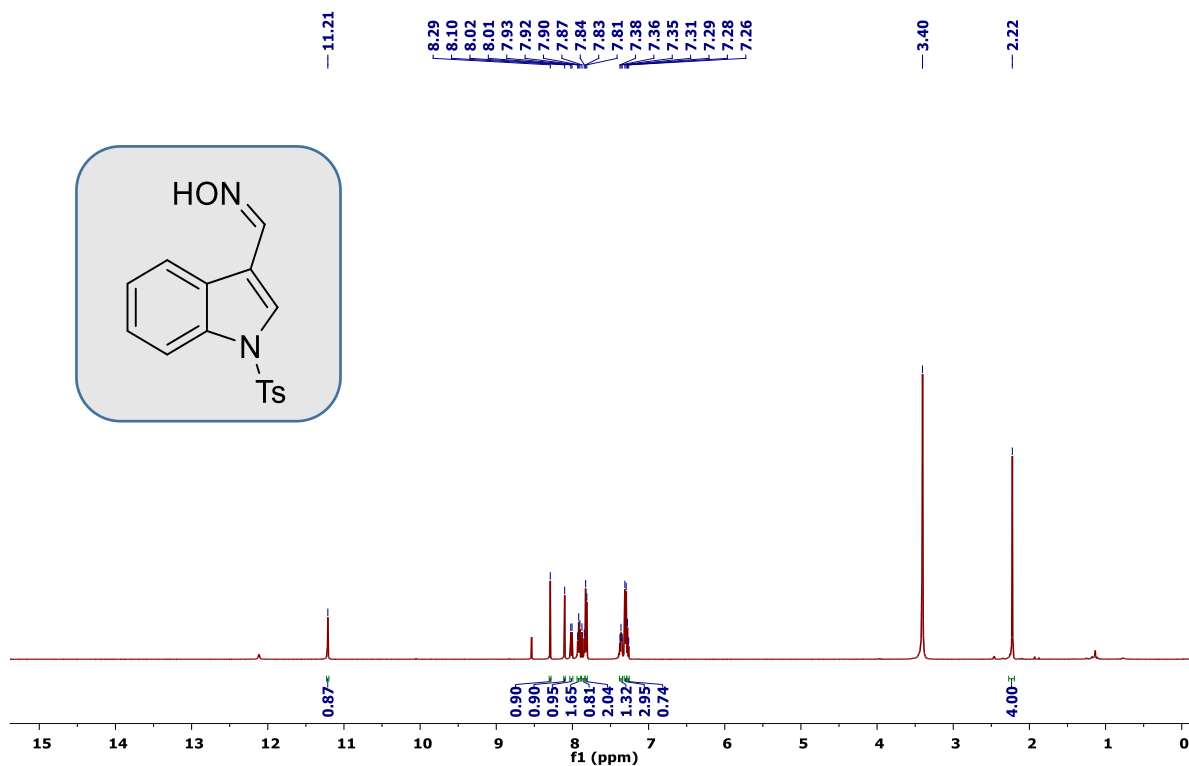

**<sup>13</sup>C NMR (126 MHz, DMSO-d6)**

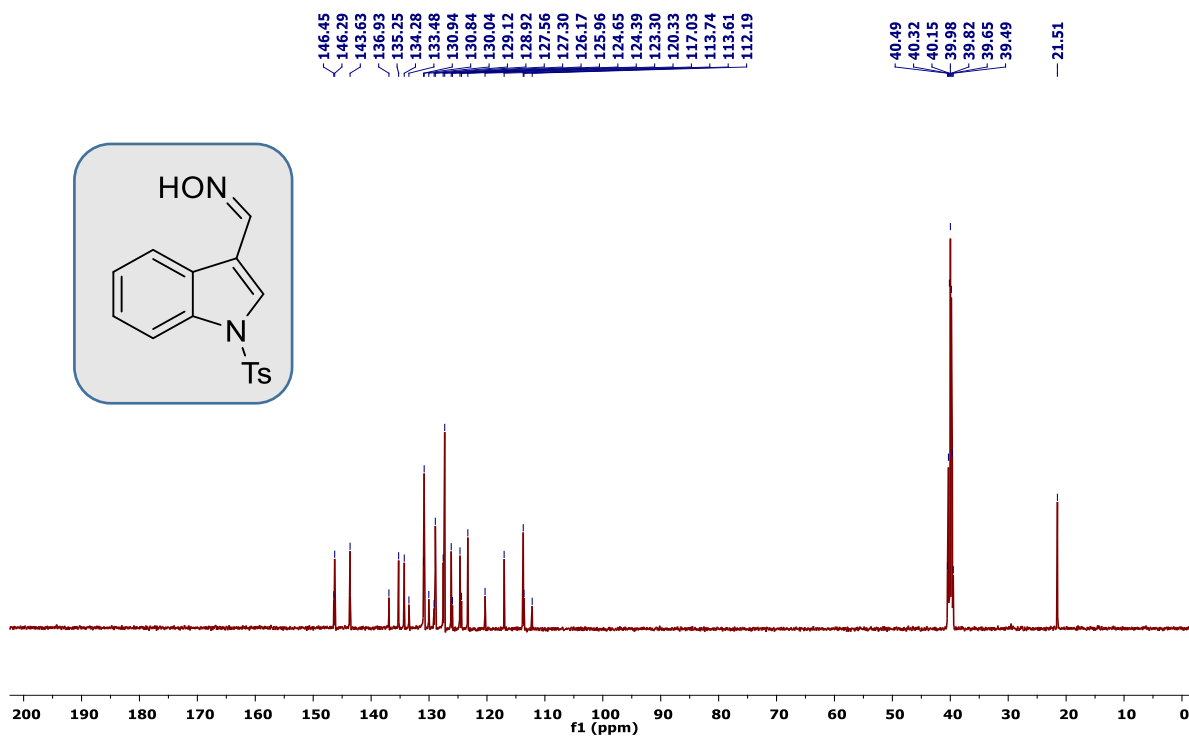

**benzofuran-3-carbaldehyde oxime(1o)**  
**<sup>1</sup>H NMR (500 MHz, DMSO-d6)**

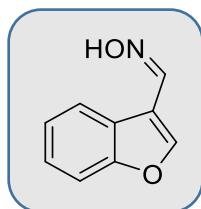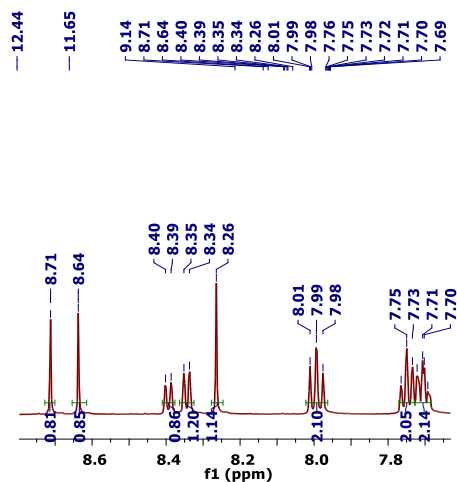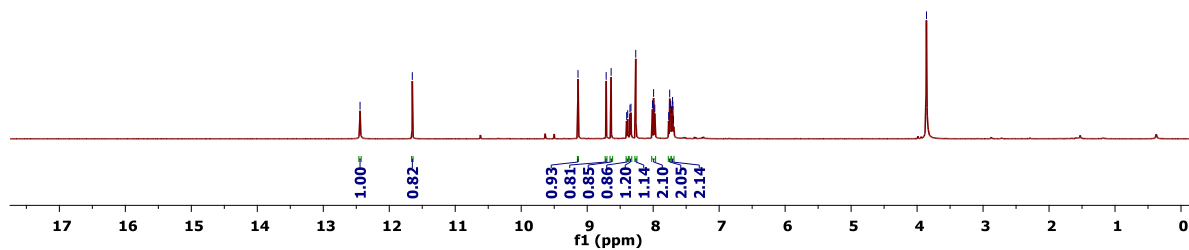

**<sup>13</sup>C NMR (126 MHz, DMSO-d6)**

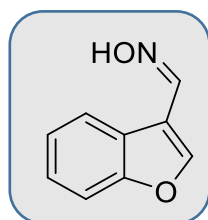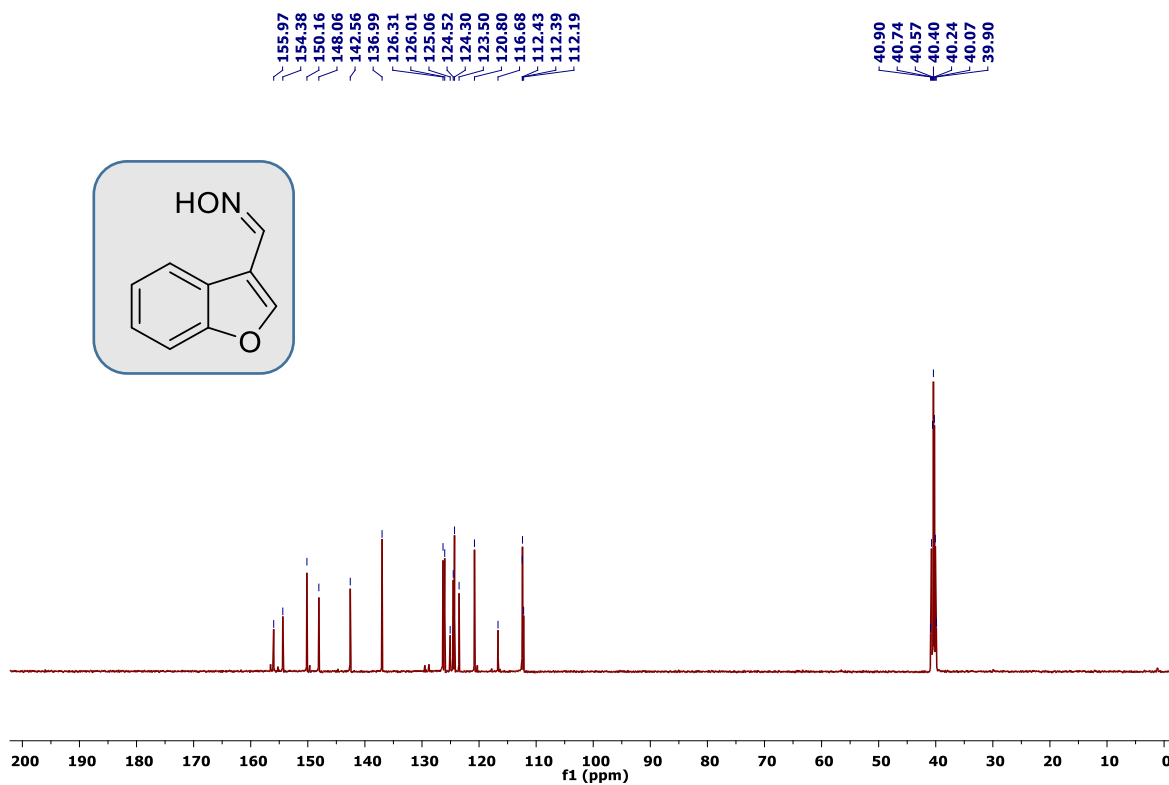

**benzo[b]thiophene-3-carbaldehyde oxime(1p)**  
**<sup>1</sup>H NMR (500 MHz, DMSO-d6)**

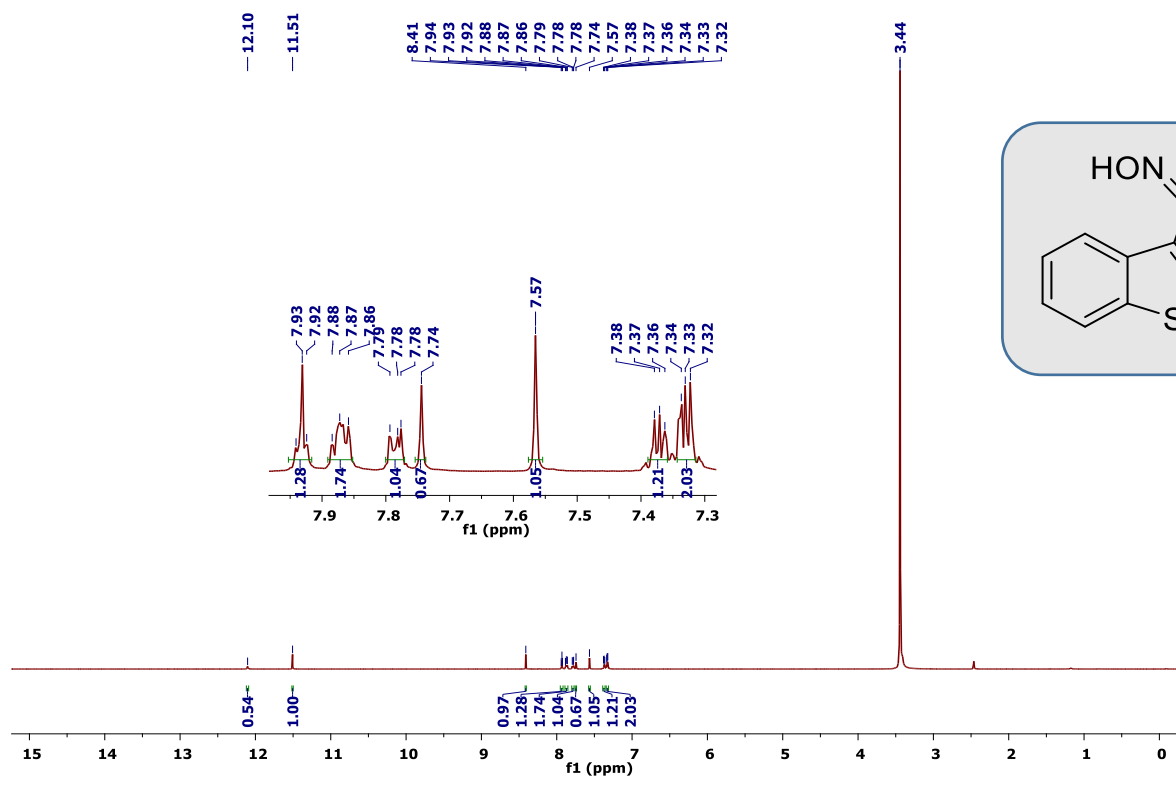

**<sup>13</sup>C NMR (126 MHz, DMSO-d6)**

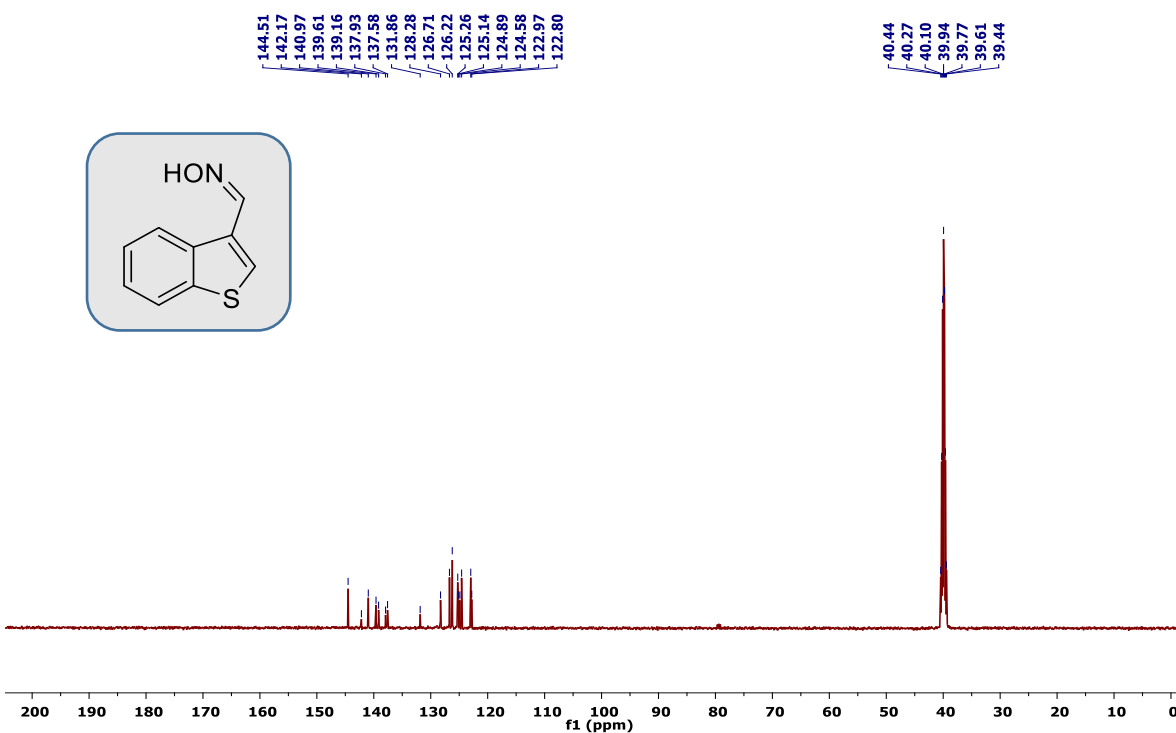

### 5-bromobenzo[b]thiophene-3-carbaldehyde oxime(1q)

<sup>1</sup>H NMR (500 MHz, DMSO-d6)

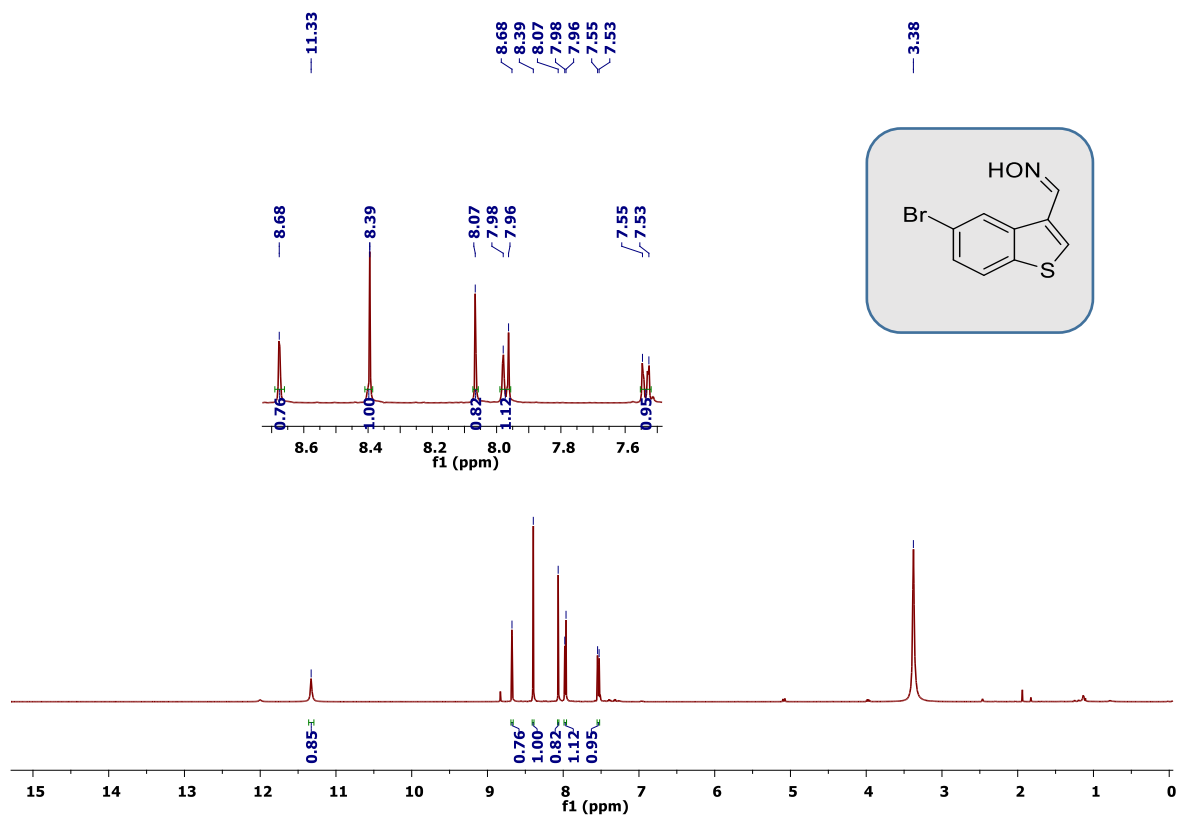

<sup>13</sup>C NMR (500 MHz, DMSO-d6)

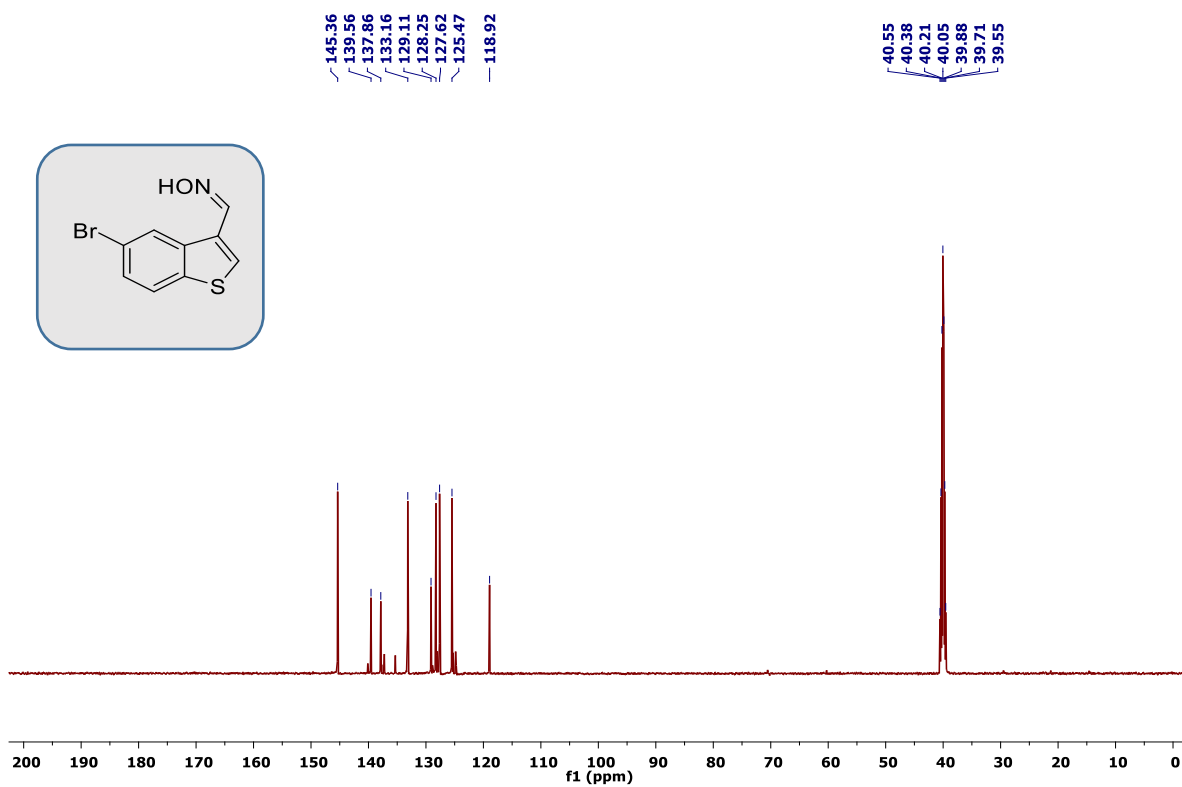

# 1H-pyrrolo[2,3-b]pyridine-3-carbaldehyde oxime(1r)

<sup>1</sup>H NMR (500 MHz, DMSO-d6)

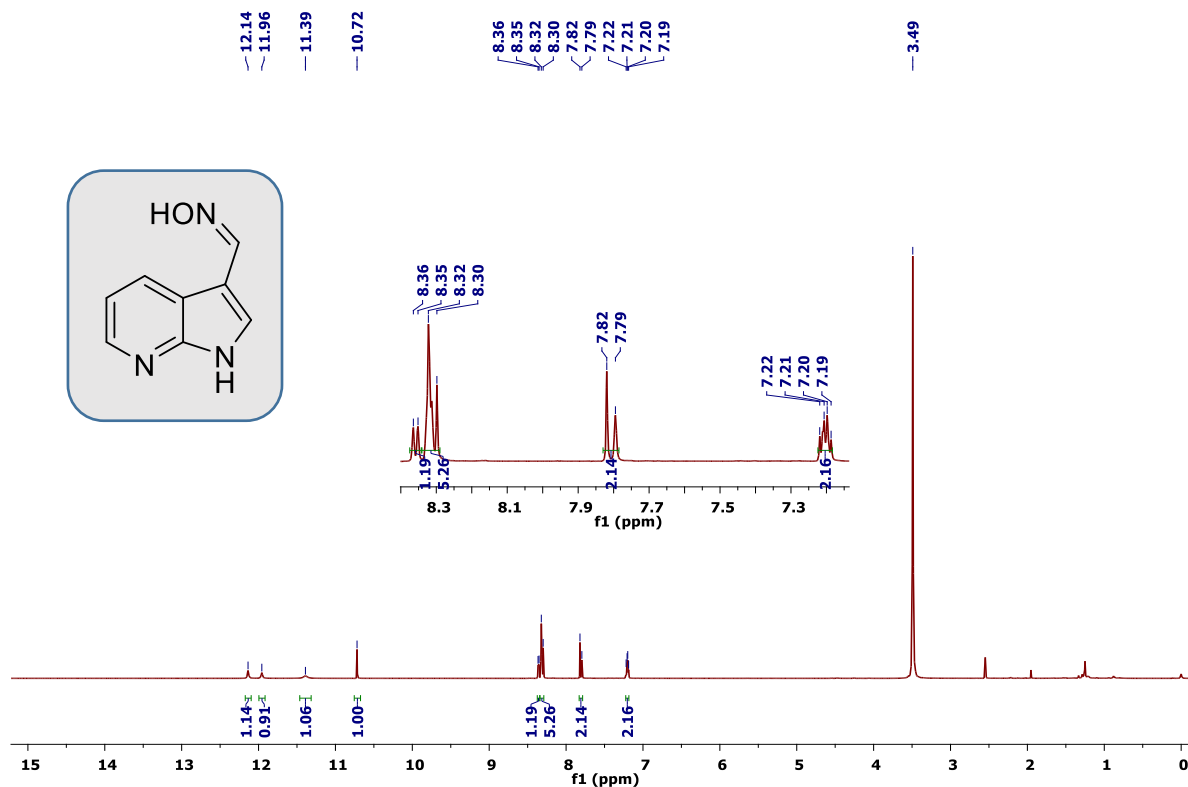

<sup>13</sup>C NMR (126 MHz, DMSO-d6)

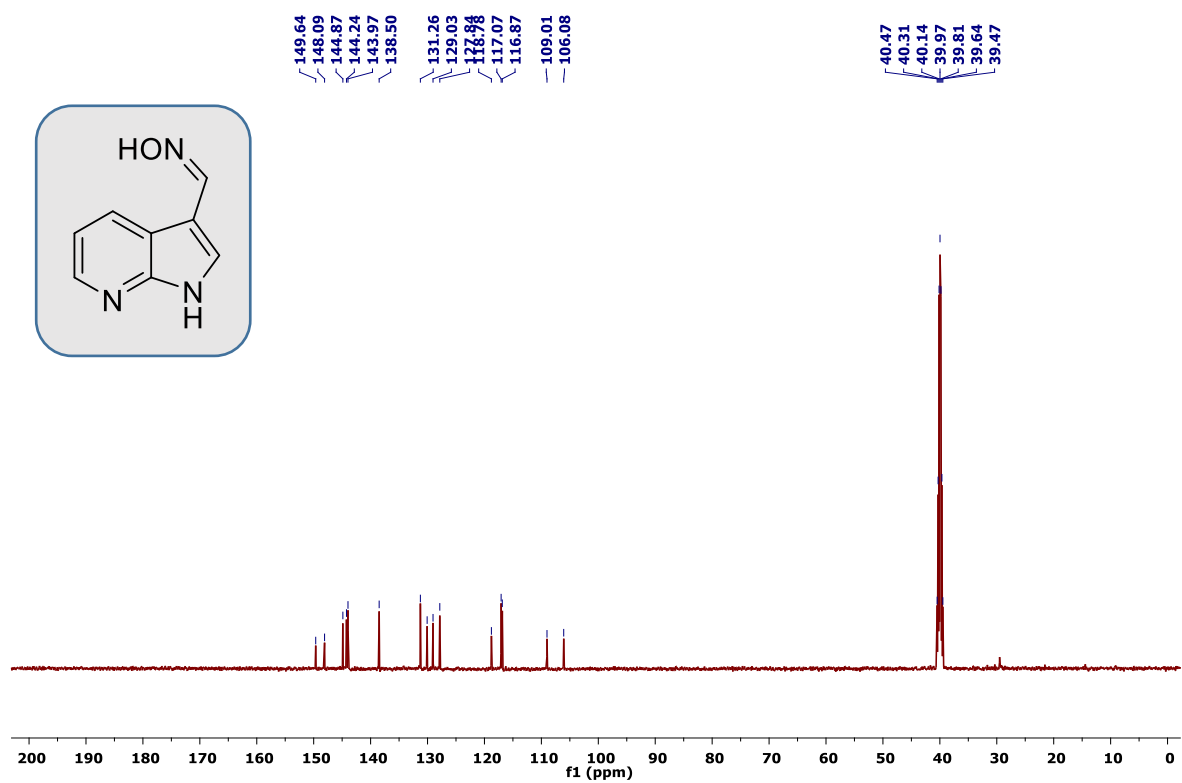

**1-benzyl-1H-pyrrolo[2,3-b]pyridine-3-carbaldehyde oxime(1s)**

<sup>1</sup>H NMR (500 MHz, CDCl<sub>3</sub>)

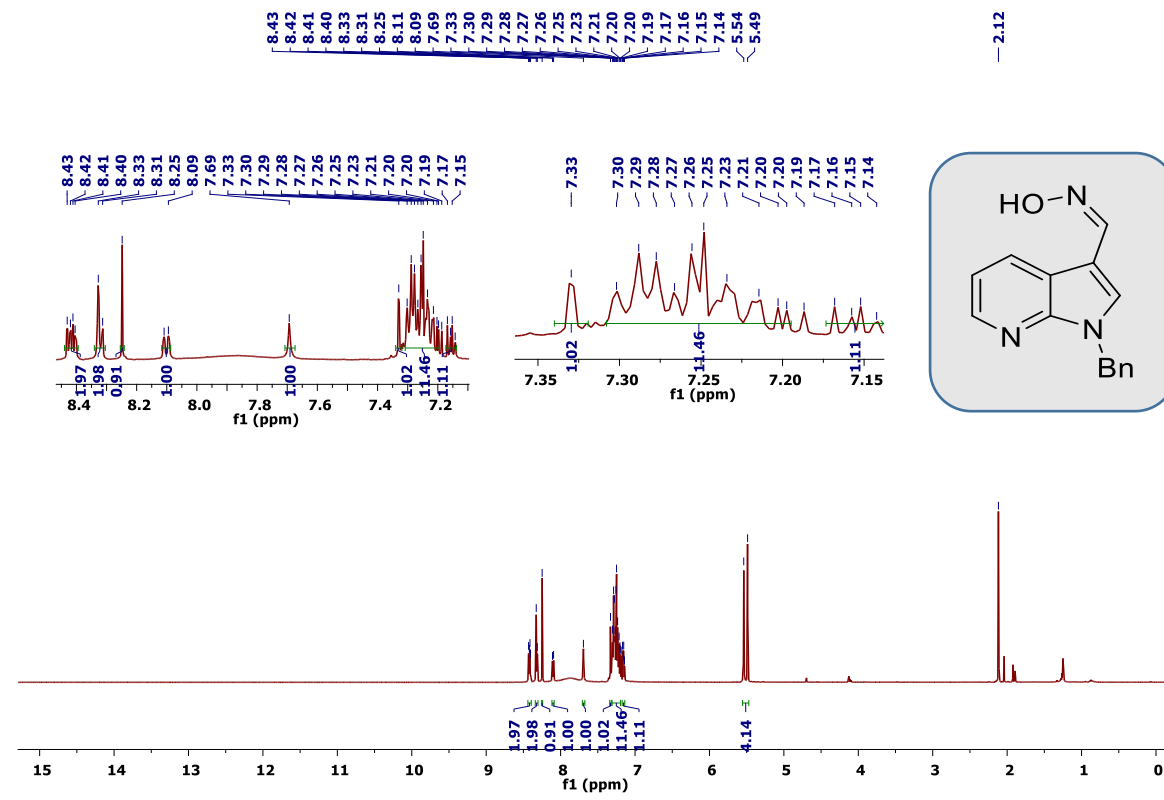

<sup>13</sup>C NMR (126 MHz, CDCl<sub>3</sub>)

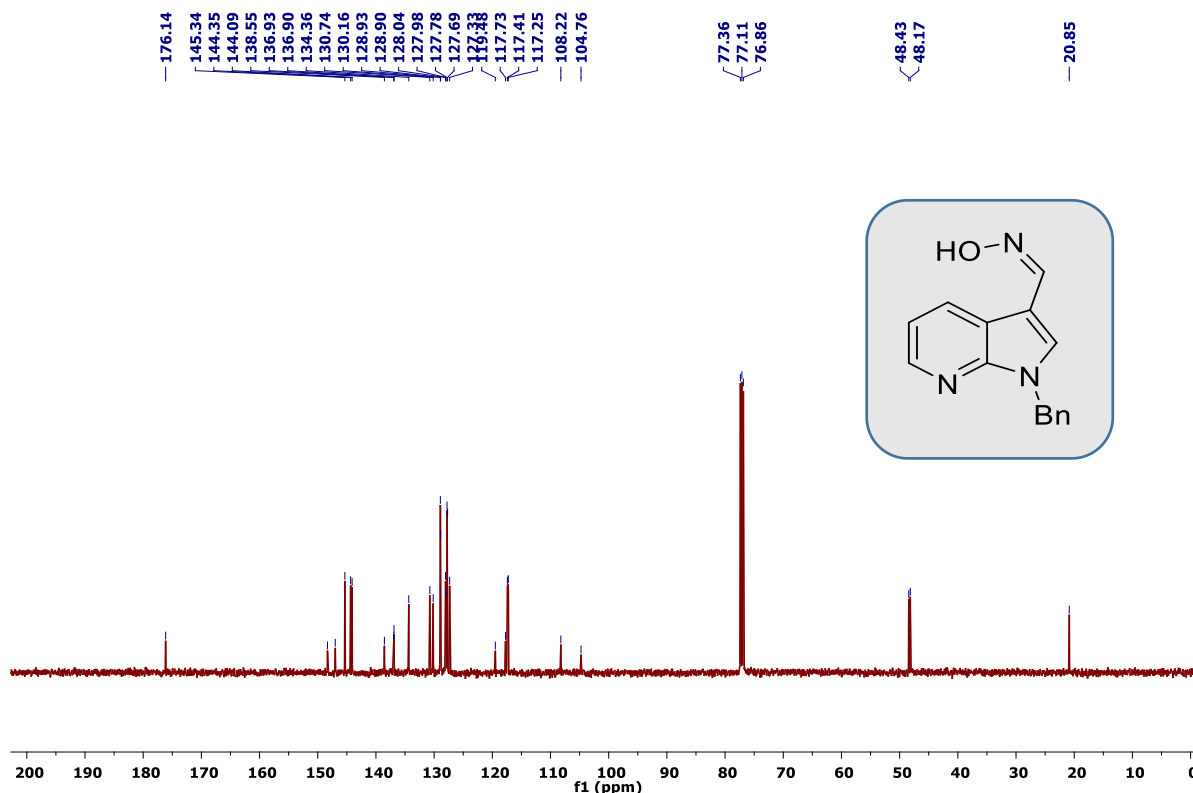

16. NMR Spectra of starting material: Aldehyde  
5-methoxy-1H-indole-3-carbaldehyde(1b')

<sup>1</sup>H NMR (500 MHz, DMSO-d6)

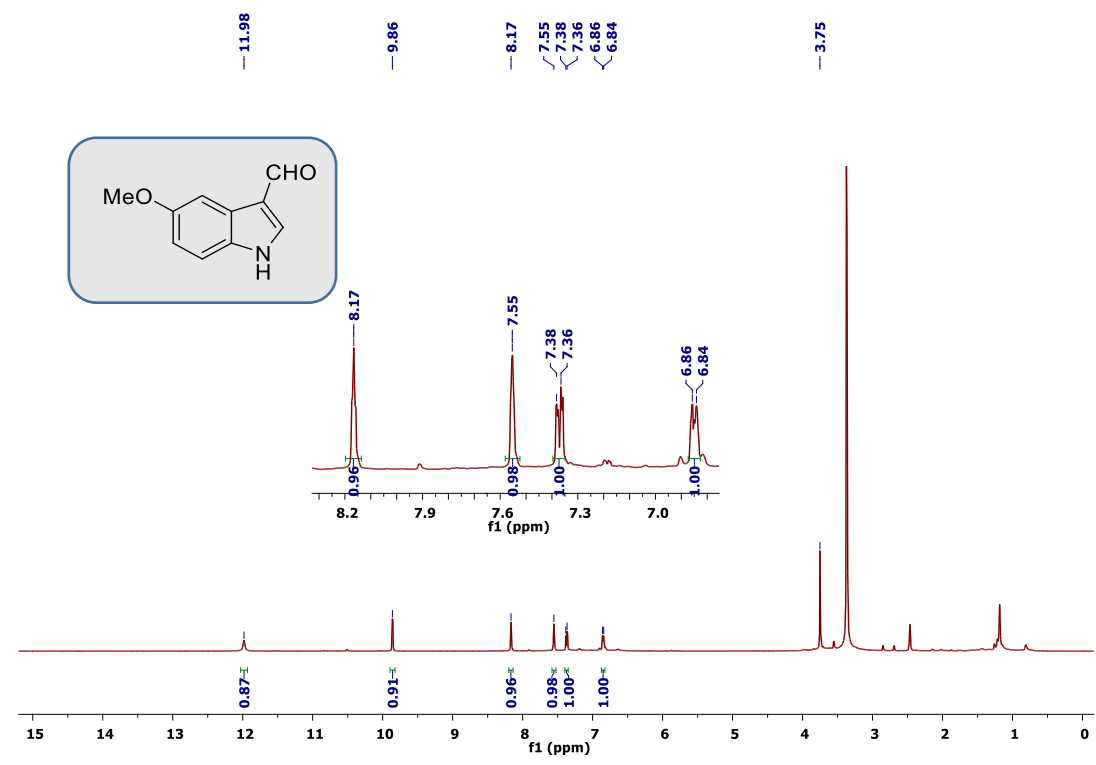

<sup>13</sup>C NMR (126 MHz, DMSO-d6)

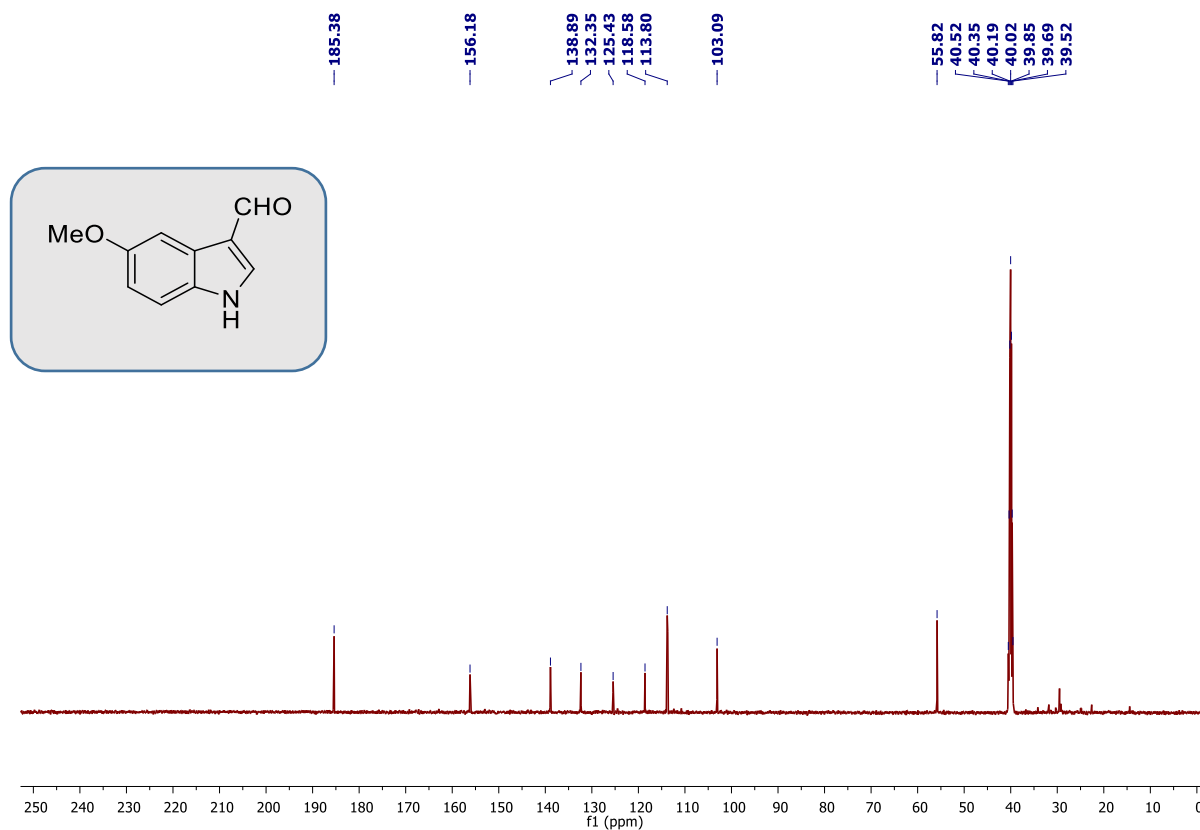

**5-methyl-1H-indole-3-carbaldehyde(1c')**

**<sup>1</sup>H NMR (500 MHz, CDCl<sub>3</sub>+DMSO-d<sub>6</sub>)**

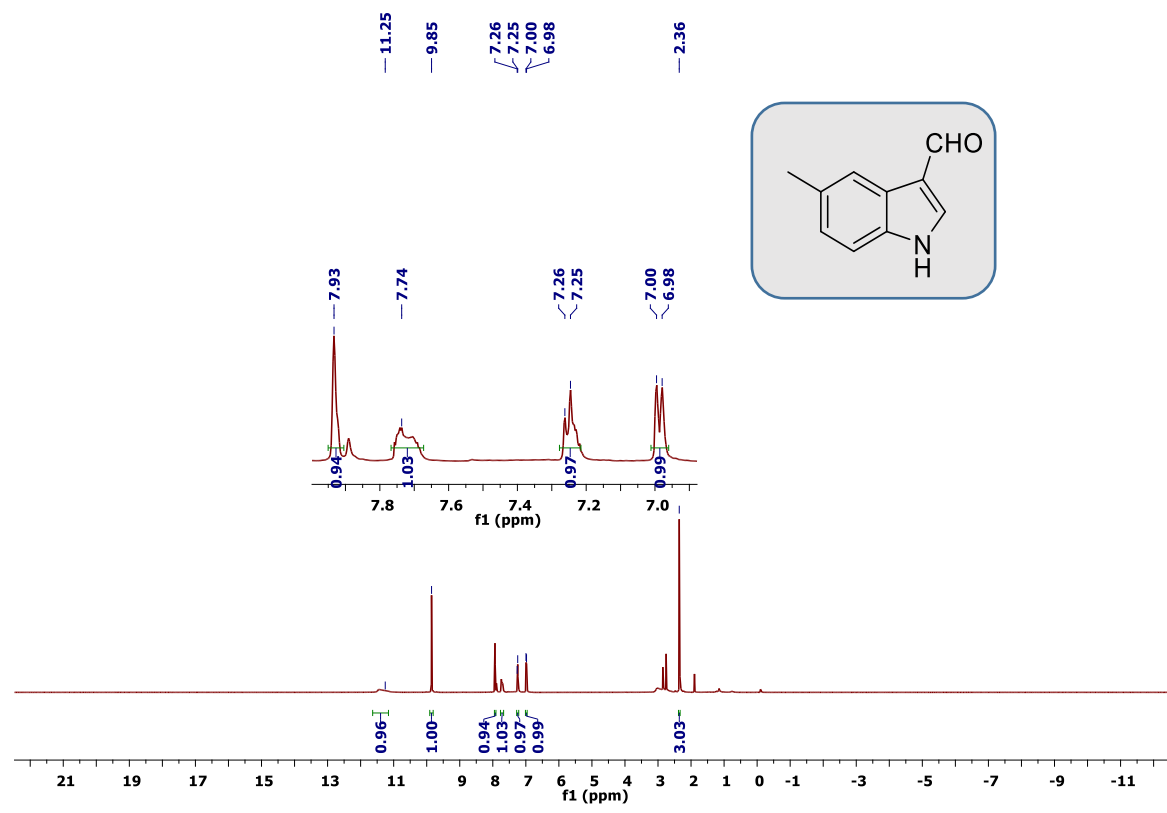

**<sup>13</sup>C NMR (126 MHz, CDCl<sub>3</sub>+DMSO-d<sub>6</sub>)**

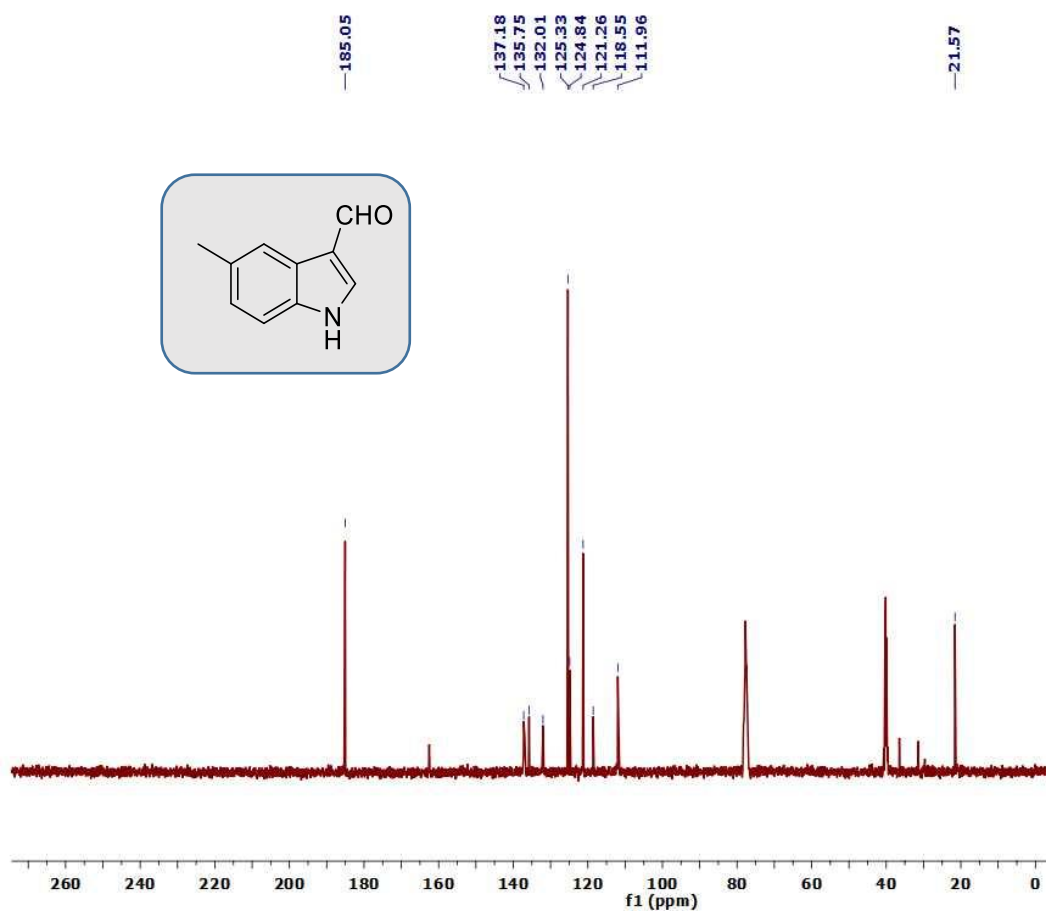

**5-chloro-1H-indole-3-carbaldehyde(1d')**

**<sup>1</sup>H NMR (500 MHz, CDCl<sub>3</sub>)**

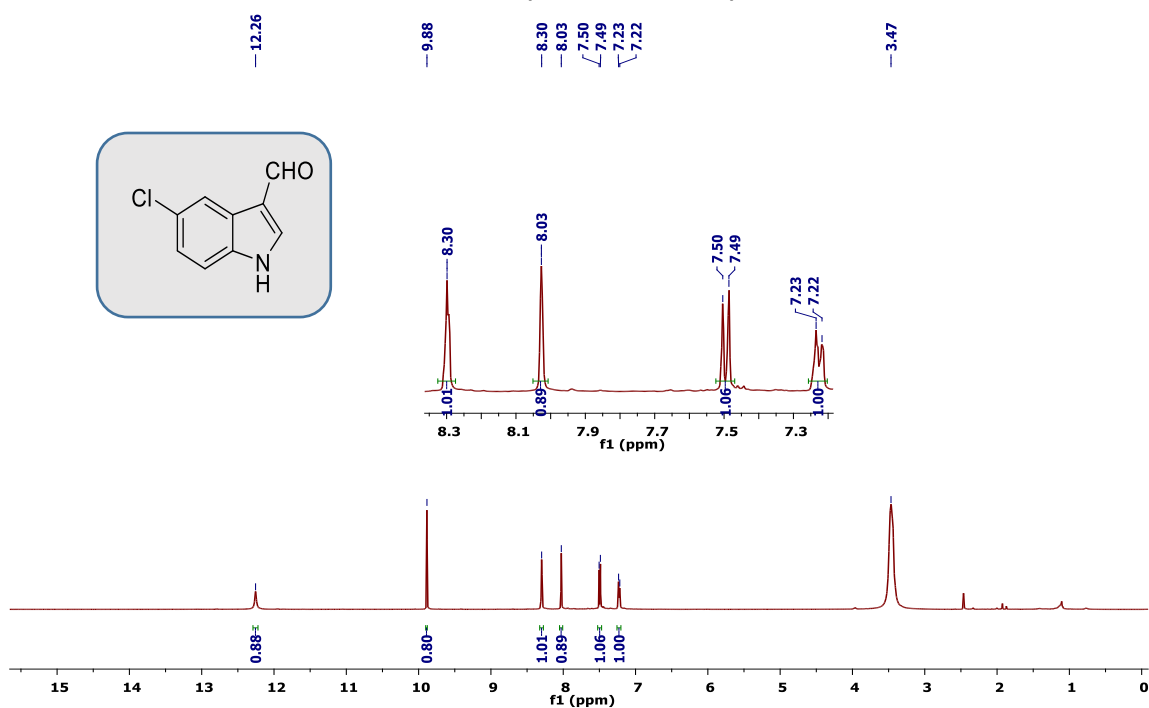

<sup>13</sup>C NMR (126 MHz, CDCl<sub>3</sub>)

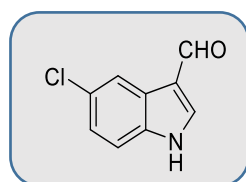

128.16  
124.83  
122.29  
120.45  
120.15  
120.01  
118.35  
111.62  
110.30

77.32  
77.07  
76.82

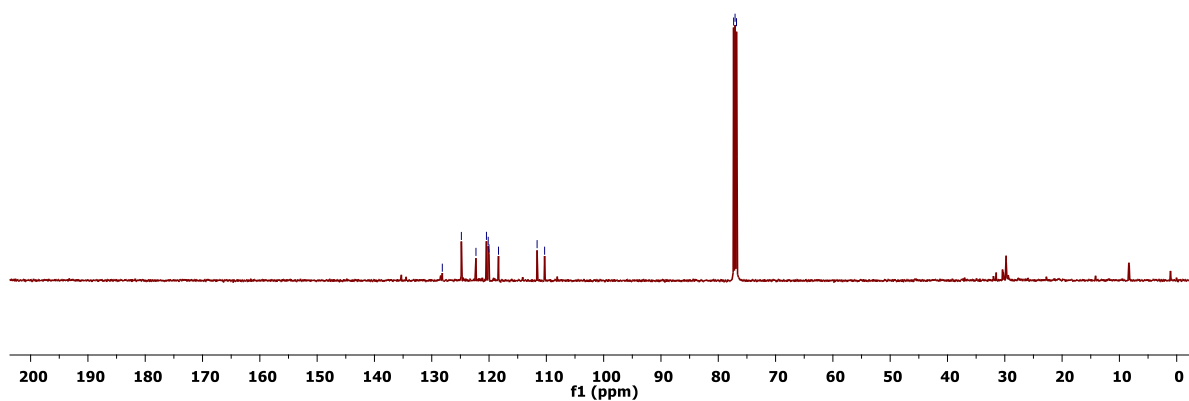

**5-nitro-1H-indole-3-carbaldehyde(1e')**

<sup>1</sup>H NMR (500 MHz, DMSO-d<sub>6</sub>)

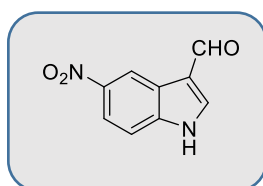

12.63

9.97

8.87  
8.87  
8.50  
8.10  
8.08  
7.66  
7.64

3.34

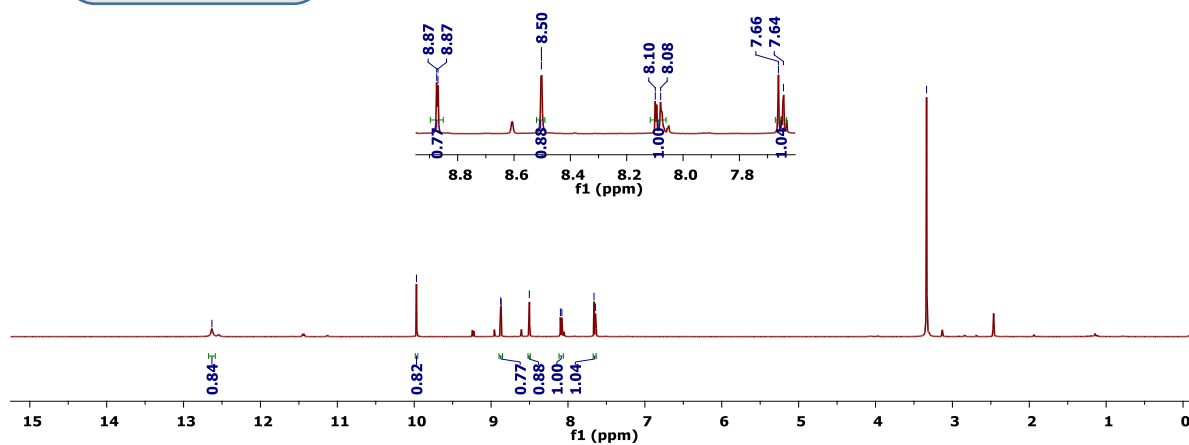

**<sup>13</sup>C NMR (126MHz, DMSO-d6)**

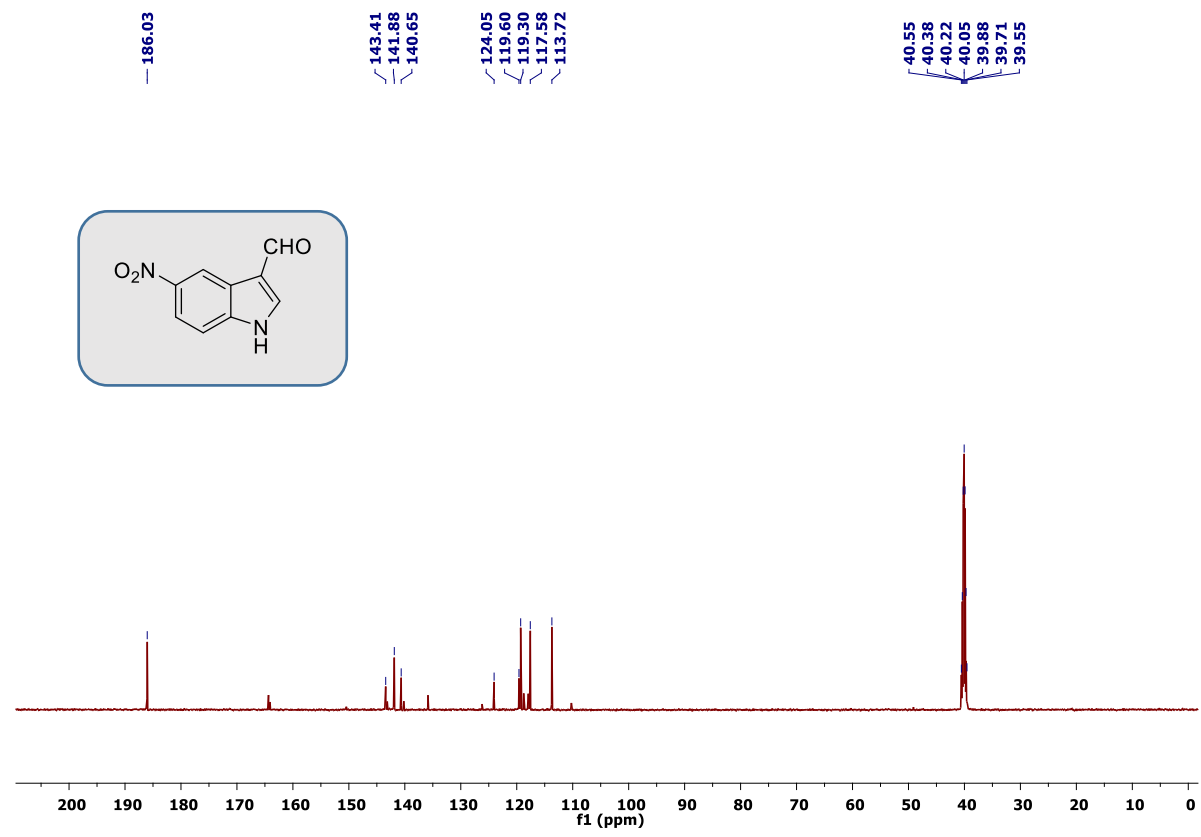

**2-(4-chlorophenyl)-1H-indole-3-carbaldehyde(1h')**

**<sup>1</sup>H NMR (500 MHz, DMSO-d6)**

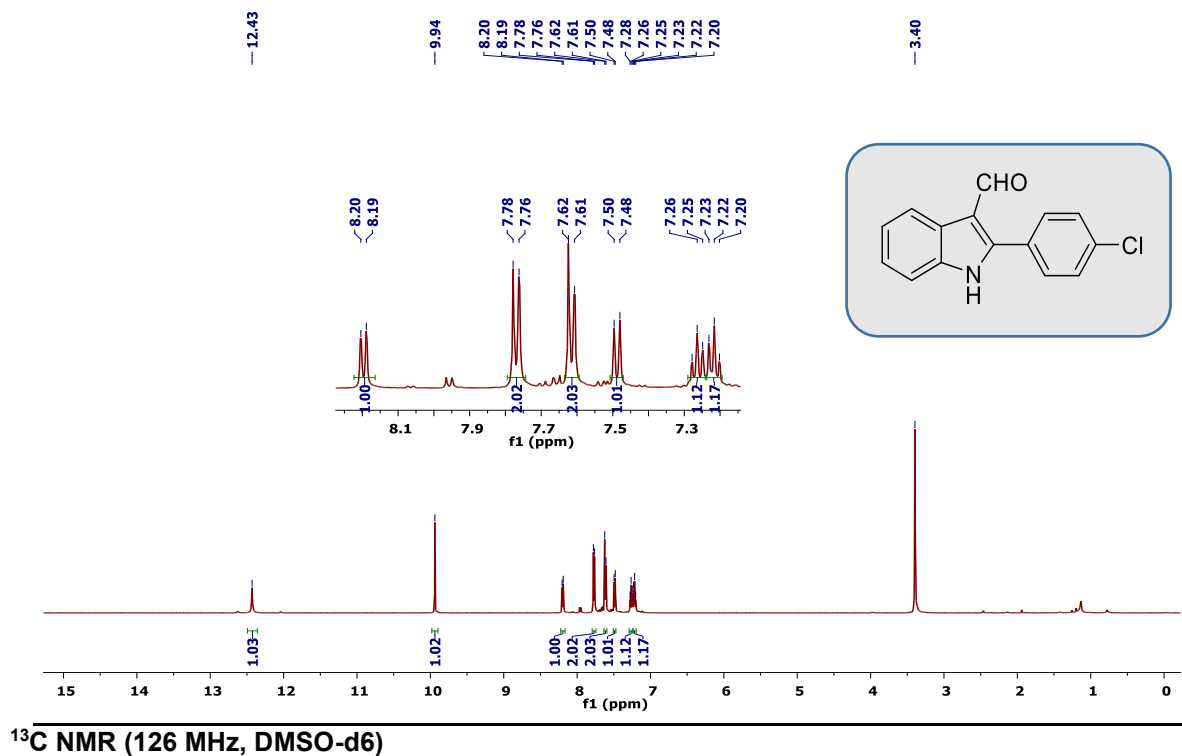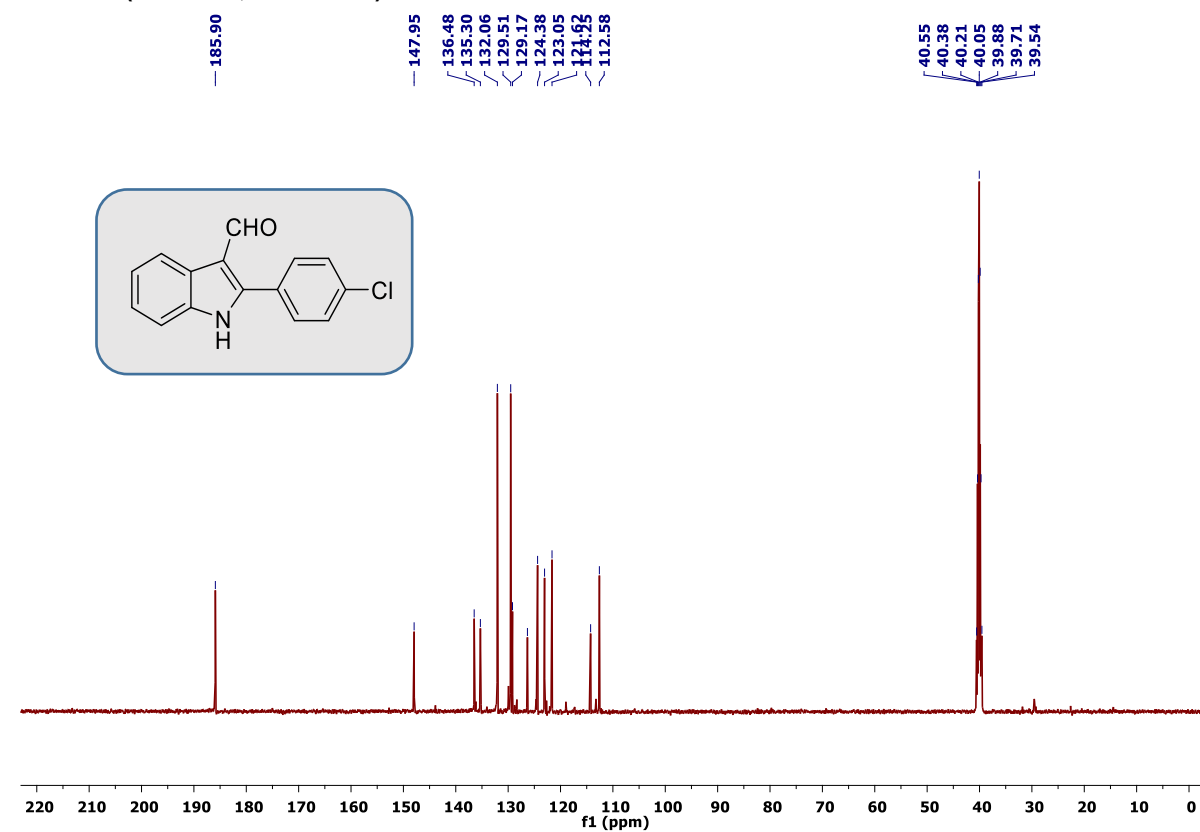

**1-methyl-1H-indole-3-carbaldehyde(1i')**

**<sup>1</sup>H NMR (500 MHz, CDCl<sub>3</sub>)**

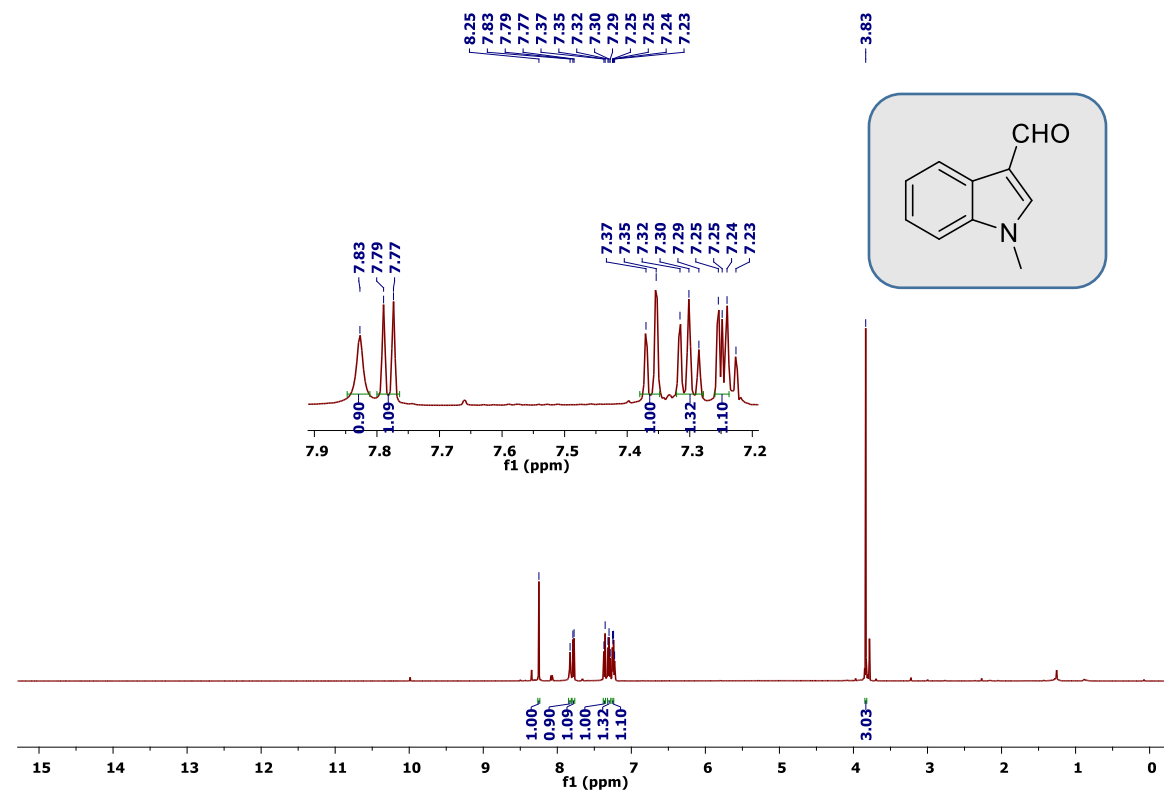

**1-methyl-2-phenyl-1H-indole-3-carbaldehyde(1j')**

<sup>1</sup>H NMR (500 MHz, CDCl<sub>3</sub>)

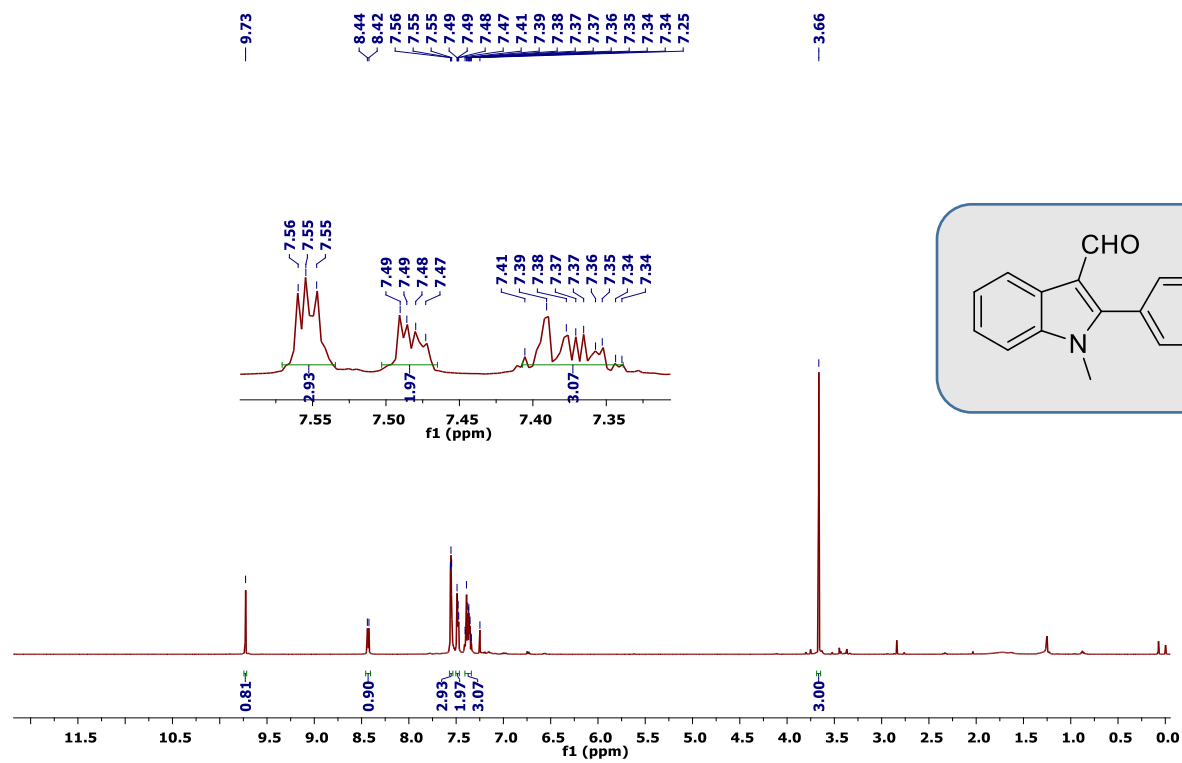

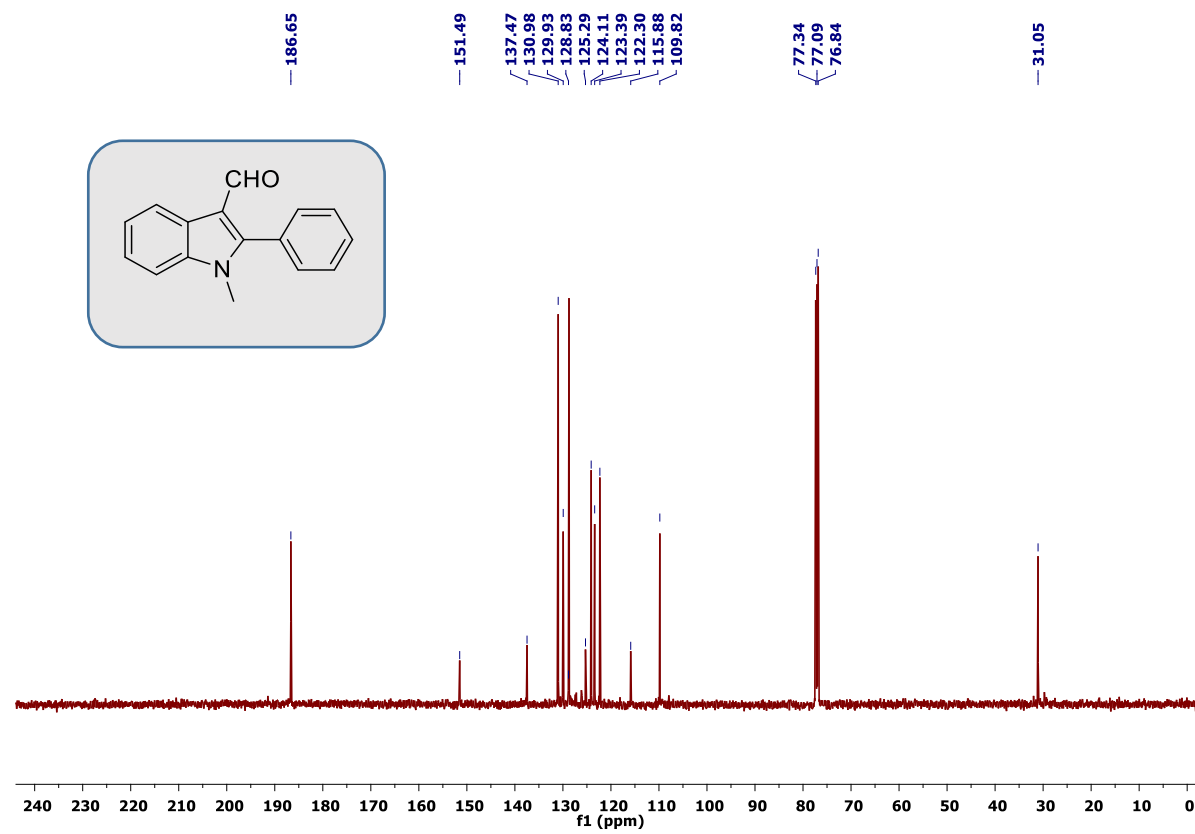

**1-benzyl-1H-indole-3-carbaldehyde(1k')**

<sup>1</sup>H NMR (500 MHz, CDCl<sub>3</sub>)

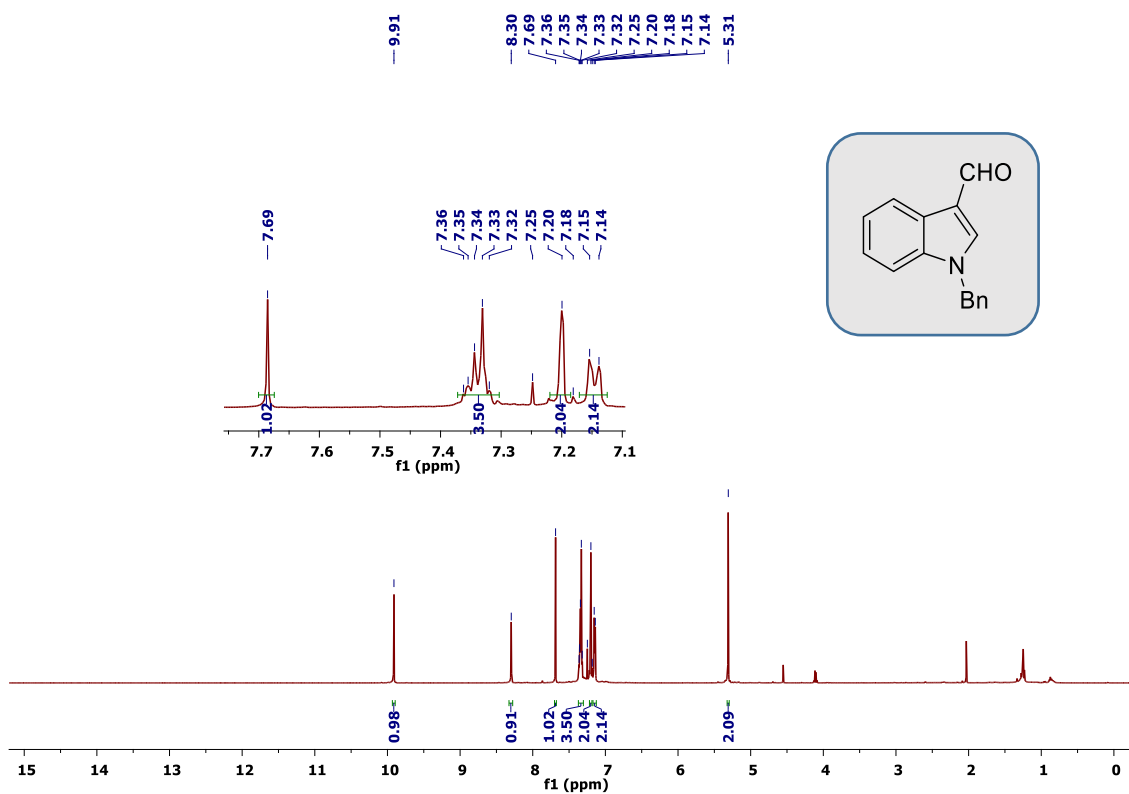

<sup>13</sup>C NMR (126 MHz, CDCl<sub>3</sub>)

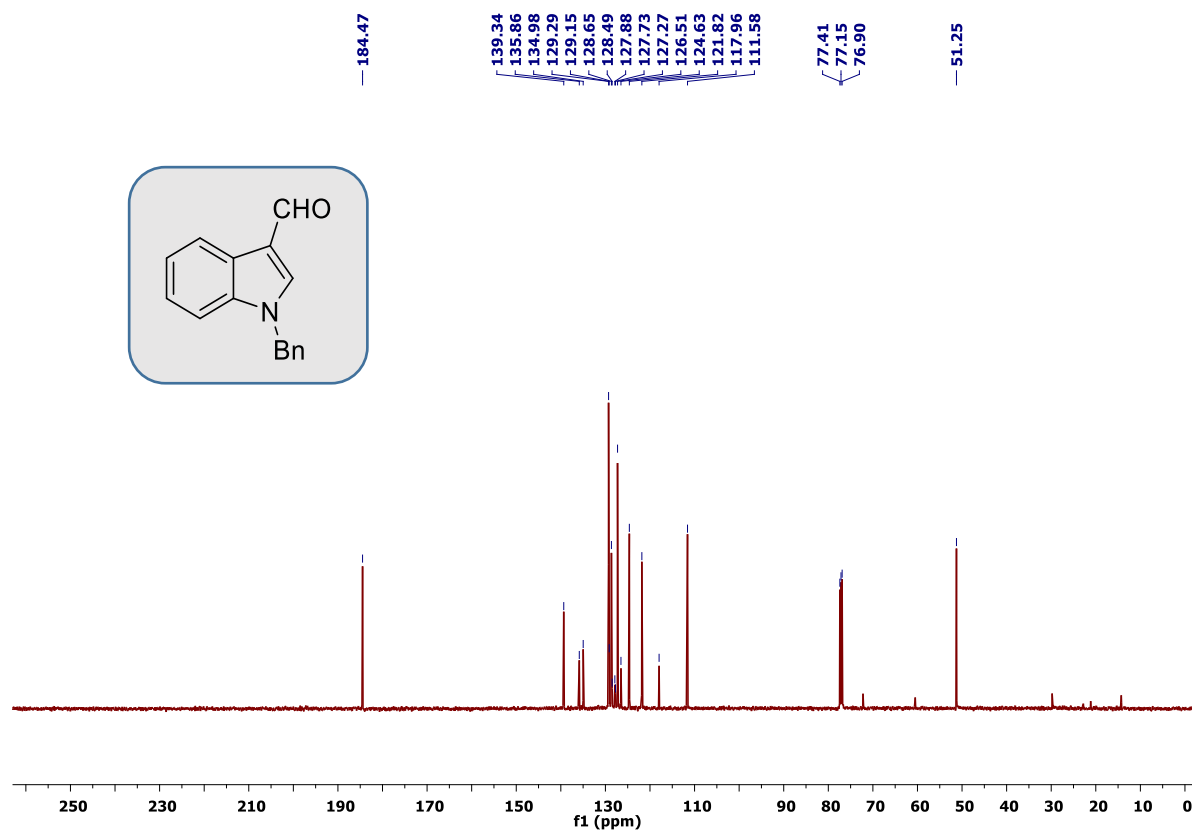

1-benzyl-5-chloro-1H-indole-3-carbaldehyde(1')

<sup>1</sup>H NMR (500 MHz, CDCl<sub>3</sub>)

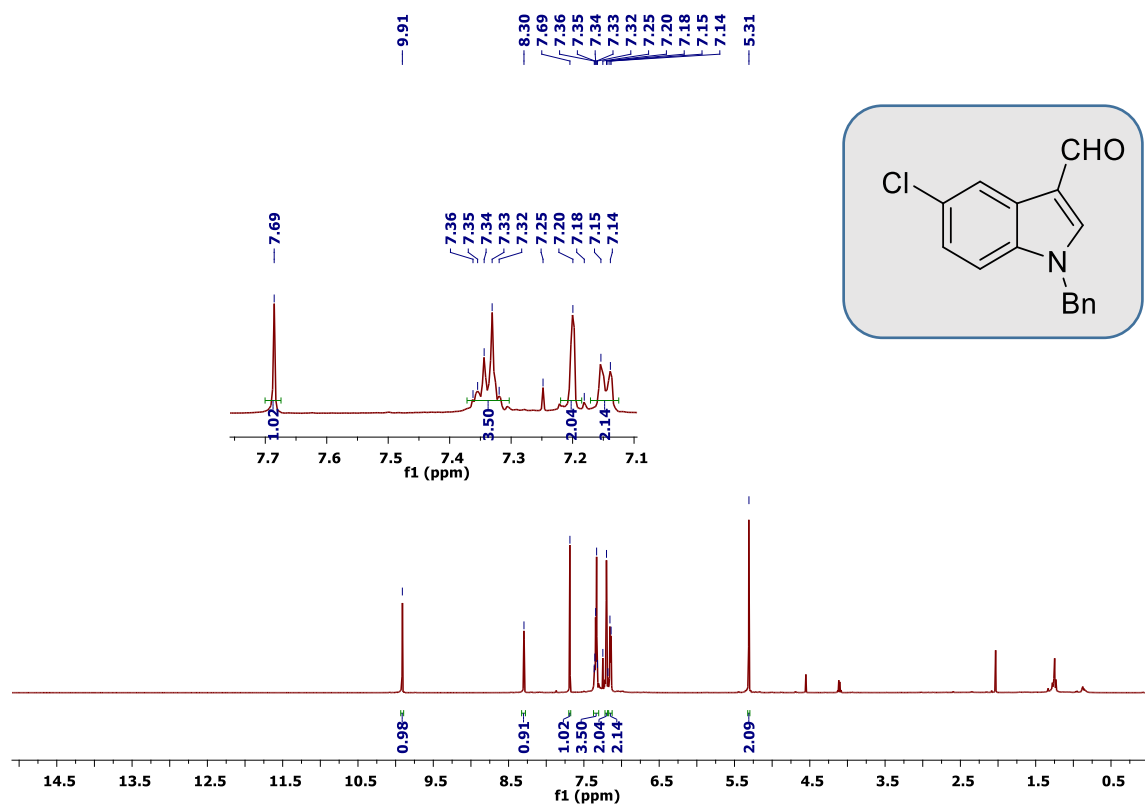

**<sup>13</sup>C NMR (126 MHz, CDCl<sub>3</sub>)**

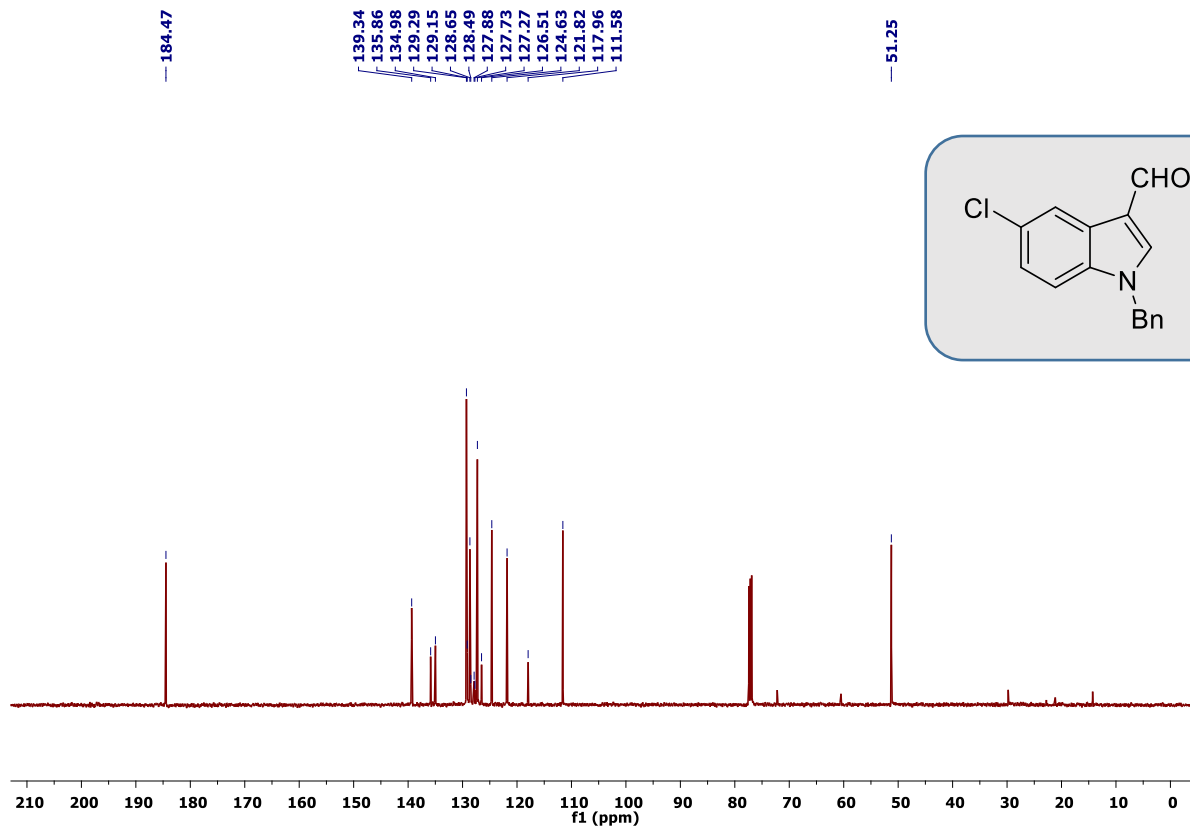

**1-tosyl-1H-indole-3-carbaldehyde(1m')**

**<sup>1</sup>H NMR (500 MHz, CDCl<sub>3</sub>)**

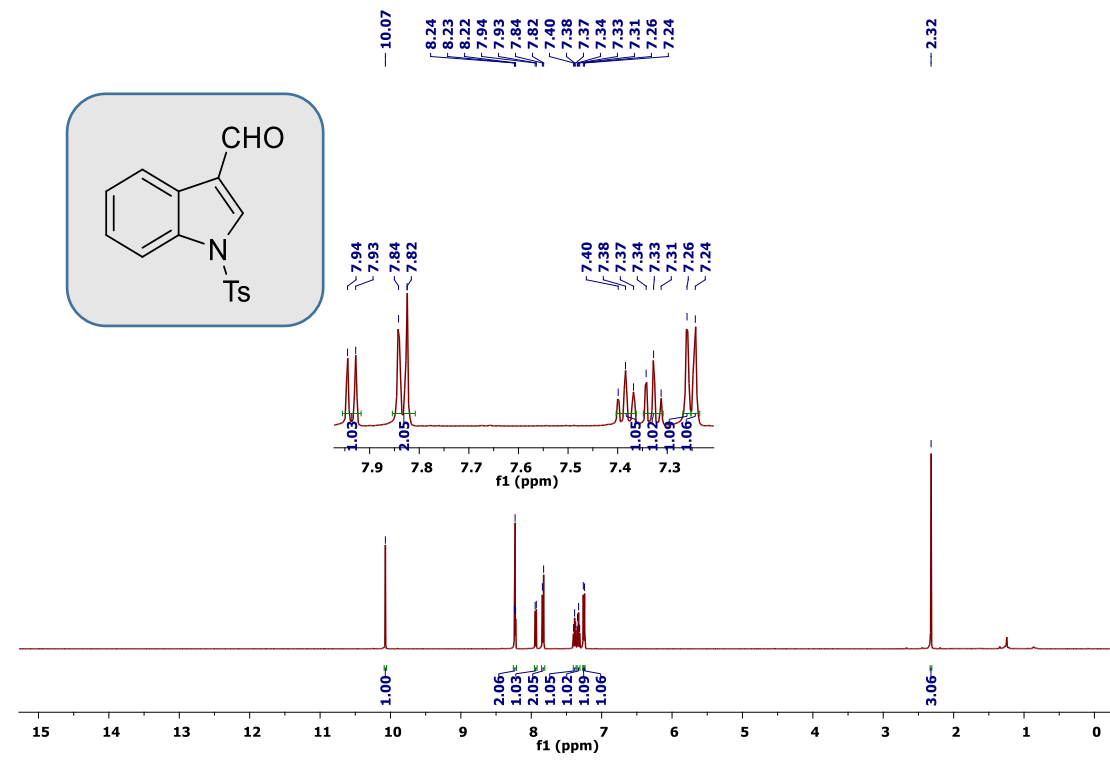

**<sup>13</sup>C NMR (126 MHz, CDCl<sub>3</sub>)**

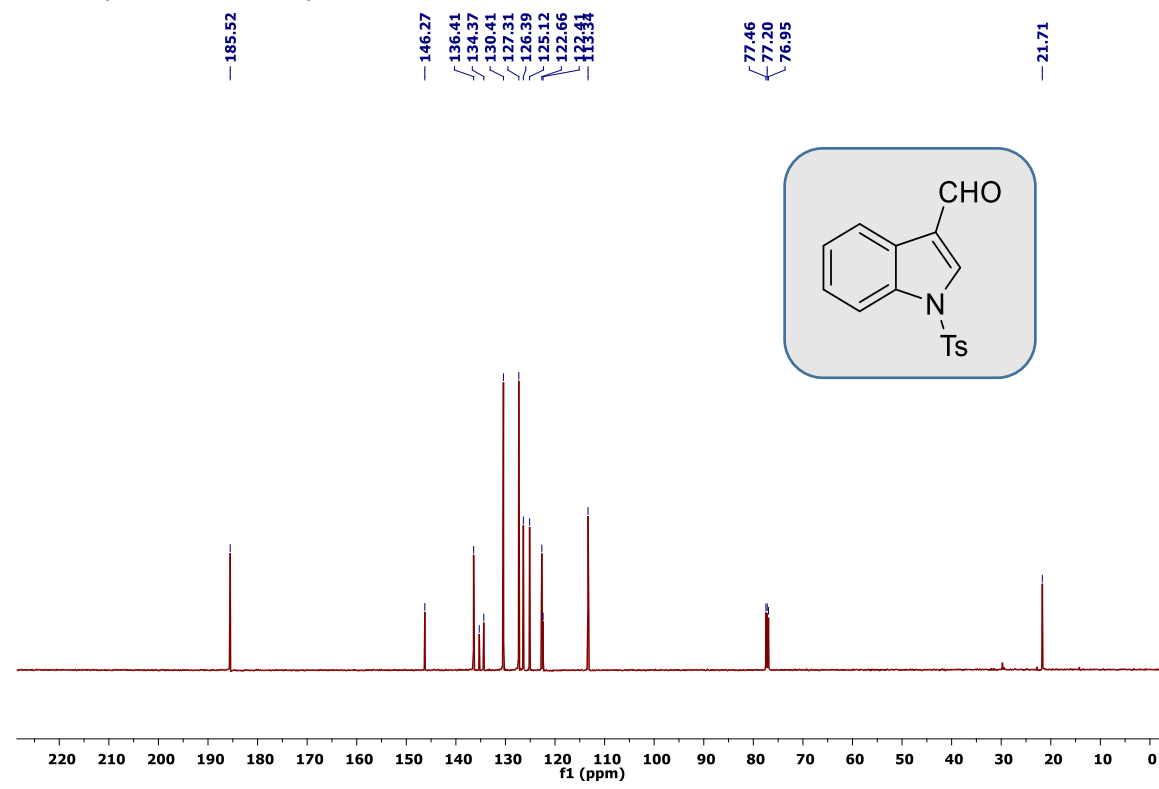

**17. NMR Data and Spectra of 1-methyl-1H-indole-3-carboxylic acid (4i)**

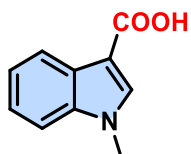

Known Compound. White solid; isolated yield 84%.

<sup>1</sup>H NMR (500 MHz, DMSO-*D*<sub>6</sub>) δ 7.99 (s, 1H), 7.97 (d, *J* = 5.3 Hz, 1H), 7.47 (d, *J* = 8.0 Hz, 1H), 7.21 (t, *J* = 7.3 Hz, 1H), 7.16 (t, *J* = 6.7 Hz, 1H), 3.80 (s, 3H).

<sup>13</sup>C NMR (126 MHz, DMSO-*D*<sub>6</sub>) δ 165.77, 137.13, 136.20, 126.49, 122.32, 121.42, 120.81, 110.72, 106.24, 33.07.

**<sup>1</sup>H NMR (500 MHz, DMSO-*D*<sub>6</sub>)**

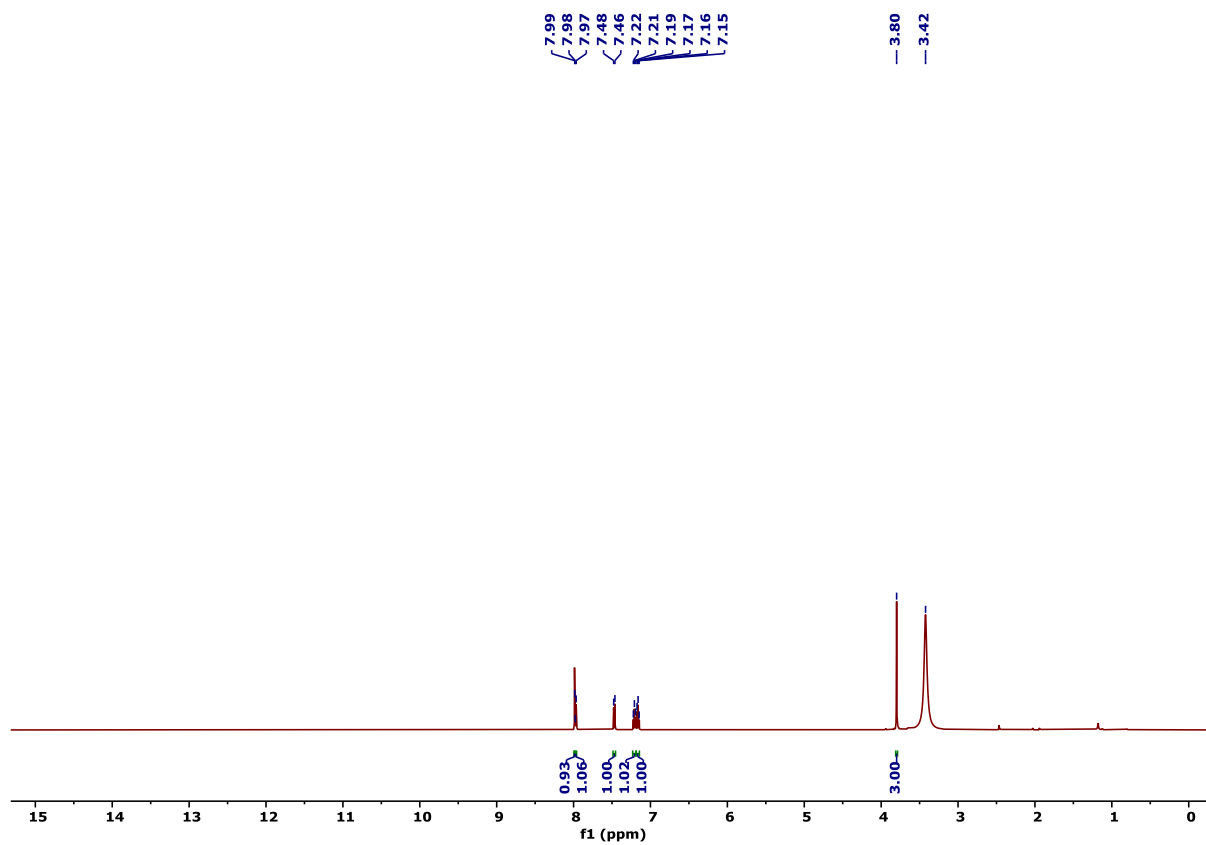

$^{13}\text{C}$  NMR (500 MHz,  $\text{DMSO-}D_6$ )

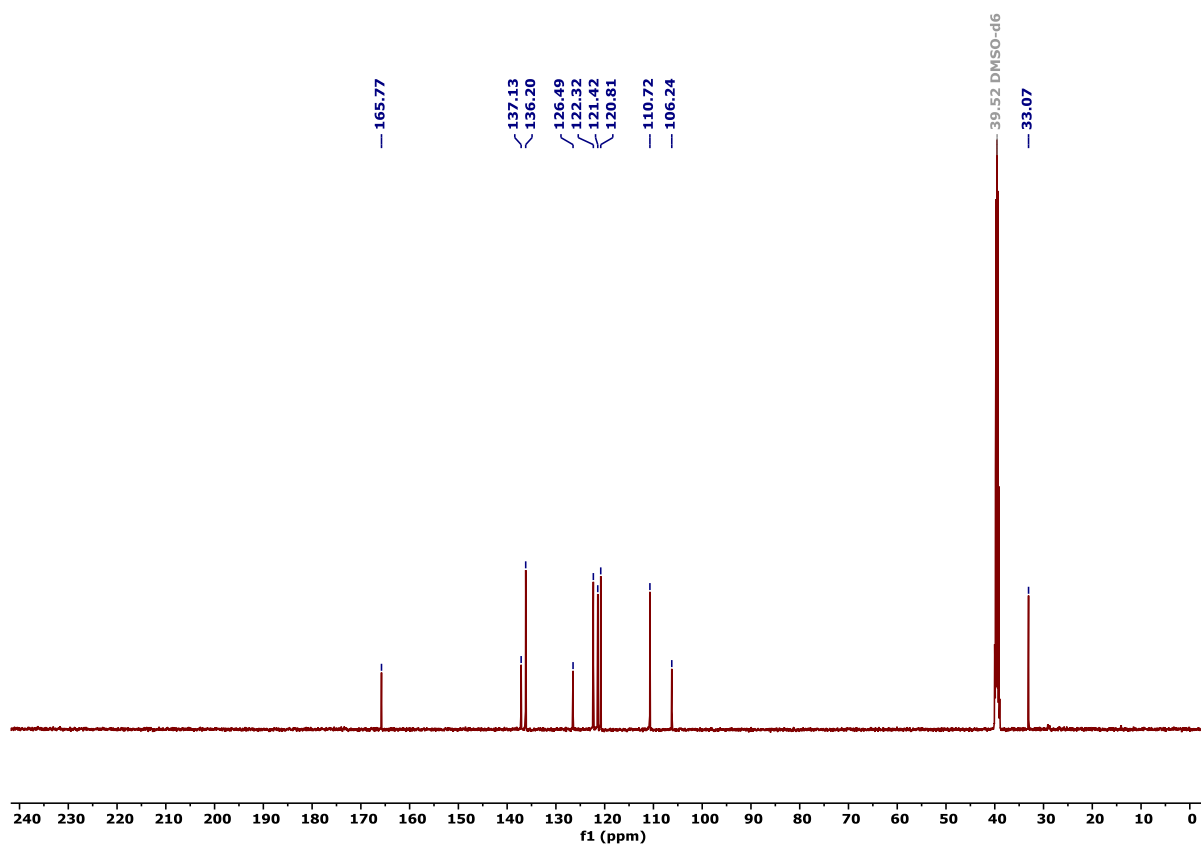

#### 18. NMR Data and Spectra of 1-methyl-1H-indole-3-carboxamide (5i)

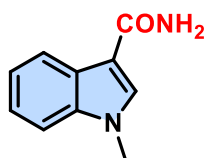

Known Compound. White solid, yield 71%.

<sup>1</sup>H NMR (500 MHz, DMSO-*D*<sub>6</sub>) δ 8.10 (d, *J* = 8.0 Hz, 1H), 7.93 (s, 1H), 7.43 (d, *J* = 8.0 Hz, 1H), 7.17 (t, *J* = 7.3 Hz, 1H), 7.10 (t, *J* = 8.0 Hz, 1H), 3.77 (s, 3H).

<sup>13</sup>C NMR (126 MHz, DMSO-*D*<sub>6</sub>) δ 166.35, 136.87, 132.48, 126.63, 122.00, 121.28, 120.72, 110.28, 109.53, 33.03.

**<sup>1</sup>H NMR (500 MHz, DMSO-*D*<sub>6</sub>)**

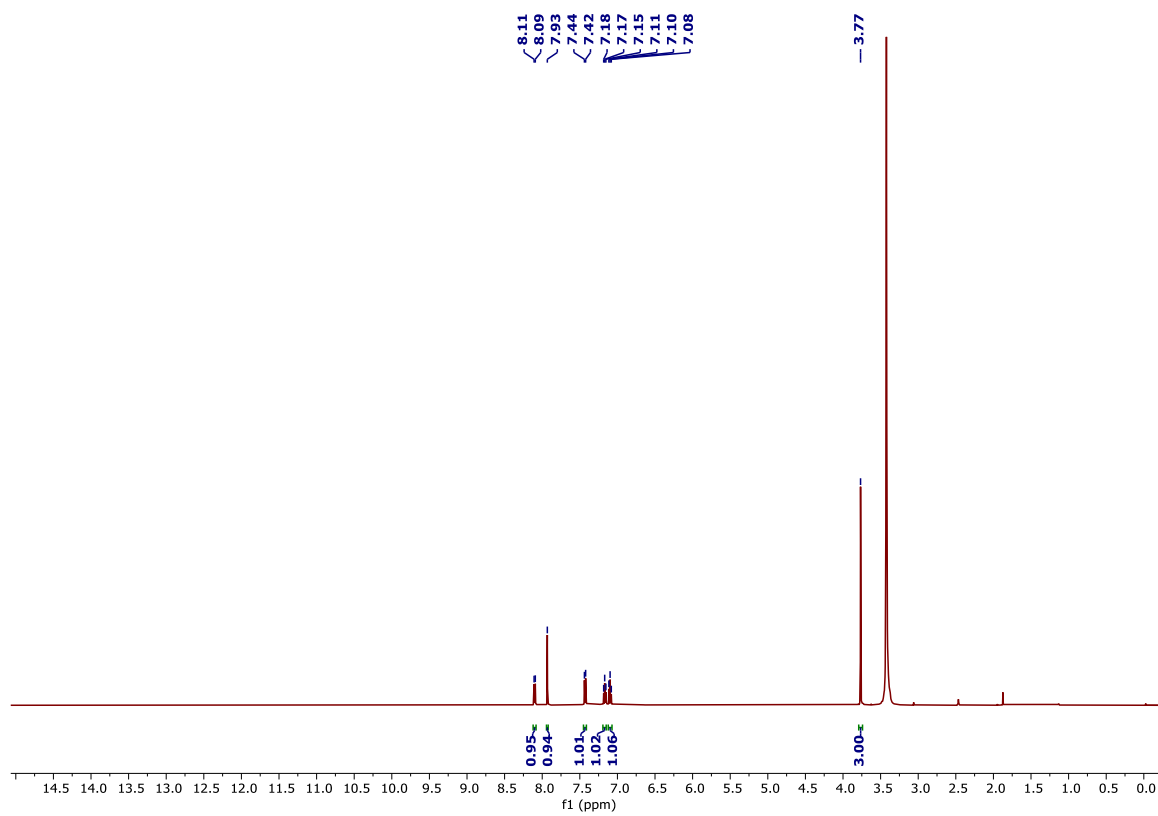

**<sup>13</sup>C NMR (500 MHz, DMSO-*D*<sub>6</sub>)**

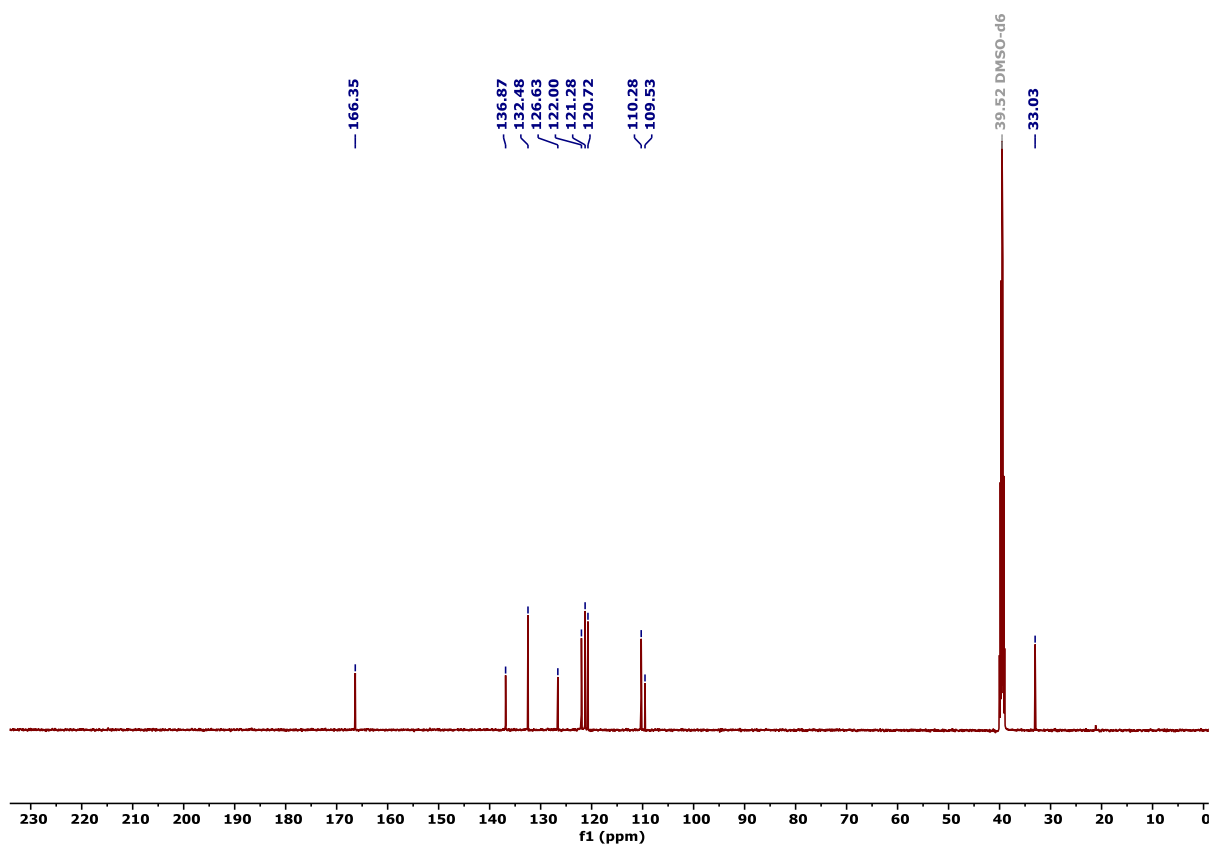

## 19. DFT Calculation Computational details:

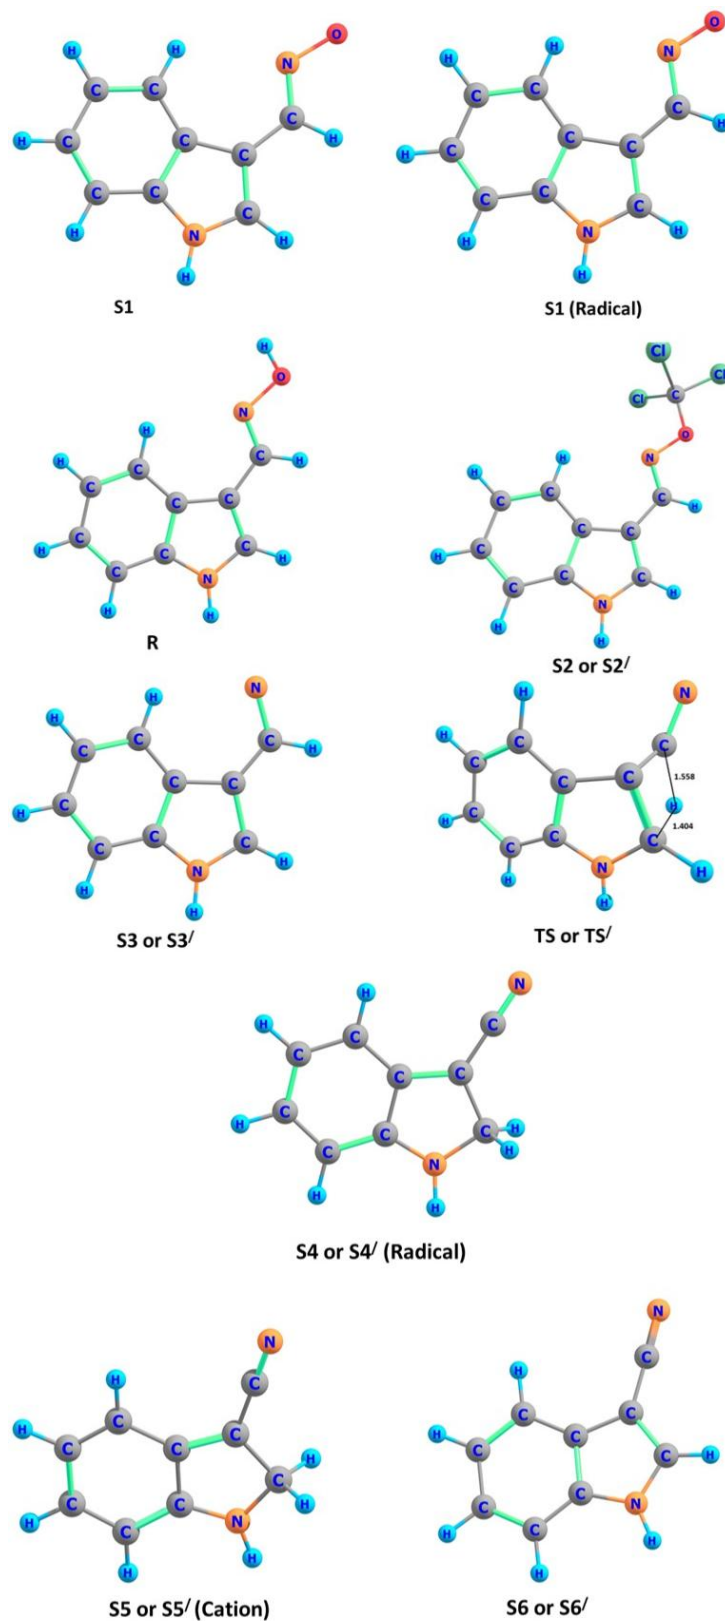

**Figure 12:** Structures of each and every species involved in both Pathway I and Pathway II calculated at wB97XD/6-311+G(d,p) level of theory.

Coordinates

R

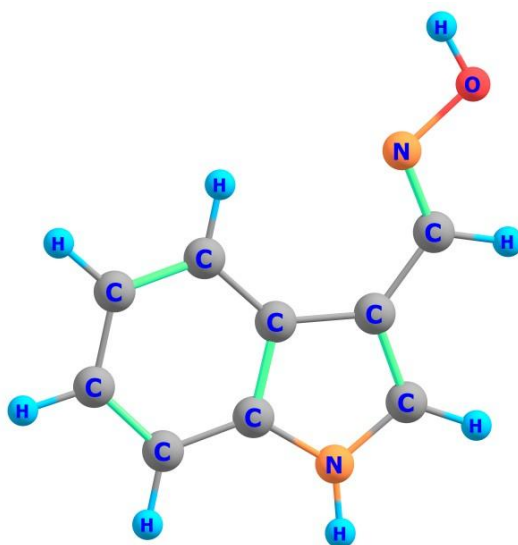

20

symmetry c1

|   |              |              |              |
|---|--------------|--------------|--------------|
| C | 0.360510000  | -0.092507000 | 0.000002000  |
| C | 1.505156000  | 0.733610000  | 0.000075000  |
| C | 2.801230000  | 0.217658000  | 0.000063000  |
| C | 2.936414000  | -1.159553000 | -0.000024000 |
| C | 1.810213000  | -2.002218000 | -0.000096000 |
| C | 0.526457000  | -1.484723000 | -0.000085000 |
| C | -0.783310000 | 0.789219000  | 0.000039000  |
| C | -0.286741000 | 2.071597000  | 0.000132000  |
| H | 3.666150000  | 0.870747000  | 0.000118000  |
| H | 3.928492000  | -1.596772000 | -0.000035000 |
| H | 1.954148000  | -3.076860000 | -0.000163000 |
| H | -0.338564000 | -2.135986000 | -0.000142000 |
| H | -0.820107000 | 3.010295000  | 0.000185000  |
| N | 1.075000000  | 2.042941000  | 0.000154000  |
| C | -2.194692000 | 0.476620000  | -0.000008000 |

|   |              |              |              |
|---|--------------|--------------|--------------|
| N | -2.621989000 | -0.725869000 | -0.000096000 |
| O | -4.019144000 | -0.757112000 | -0.000126000 |
| H | 1.669634000  | 2.854830000  | 0.000220000  |
| H | -4.225887000 | -1.694704000 | -0.000190000 |
| H | -2.903205000 | 1.307628000  | 0.000033000  |

S-2 or S2'

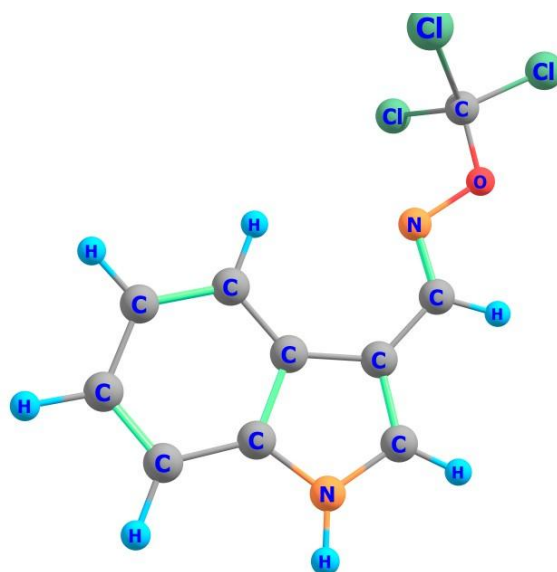

23

symmetry c1

|   |              |              |              |
|---|--------------|--------------|--------------|
| C | -2.430624000 | 0.054961000  | -0.000411000 |
| C | -3.790902000 | 0.424447000  | 0.000158000  |
| C | -4.821959000 | -0.513805000 | 0.000637000  |
| C | -4.461162000 | -1.850149000 | 0.000515000  |
| C | -3.110628000 | -2.240960000 | -0.000051000 |
| C | -2.091258000 | -1.304457000 | -0.000508000 |
| C | -1.674612000 | 1.285732000  | -0.000833000 |
| C | -2.593006000 | 2.313672000  | -0.000506000 |
| H | -5.861771000 | -0.208238000 | 0.001075000  |
| H | -5.234719000 | -2.609568000 | 0.000862000  |

|    |              |              |              |
|----|--------------|--------------|--------------|
| H  | -2.866366000 | -3.297188000 | -0.000135000 |
| H  | -1.051903000 | -1.608767000 | -0.000930000 |
| H  | -2.424255000 | 3.379871000  | -0.000657000 |
| N  | -3.849287000 | 1.805066000  | 0.000100000  |
| C  | -0.253179000 | 1.488180000  | -0.001508000 |
| N  | 0.550176000  | 0.492581000  | -0.001448000 |
| O  | 1.886828000  | 0.990356000  | -0.002472000 |
| H  | -4.692829000 | 2.354734000  | 0.000445000  |
| H  | 0.128527000  | 2.509174000  | -0.002074000 |
| C  | 2.793610000  | -0.008699000 | -0.000127000 |
| Cl | 2.653225000  | -1.061912000 | -1.456722000 |
| Cl | 2.653256000  | -1.054821000 | 1.461572000  |
| Cl | 4.376154000  | 0.797914000  | -0.002119000 |

S-3 or S3'

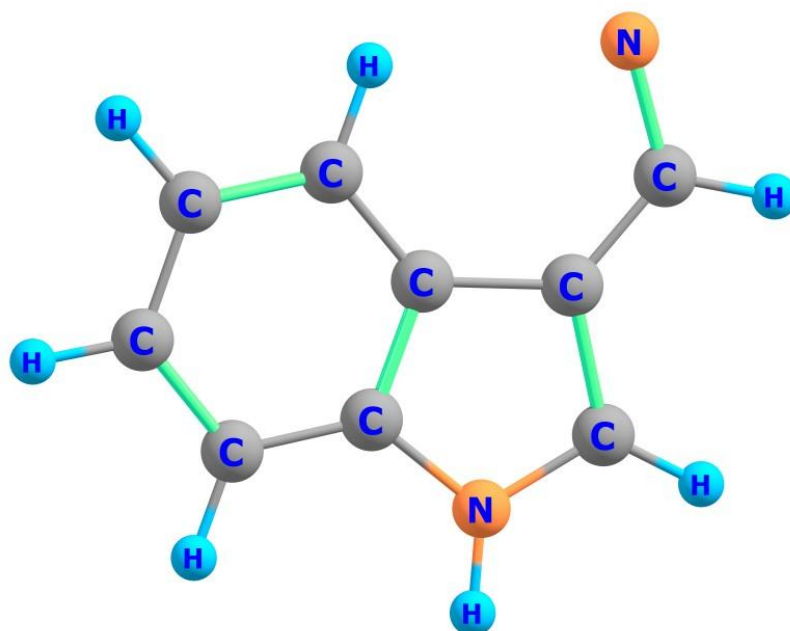

18

symmetry c1

|   |             |              |             |
|---|-------------|--------------|-------------|
| C | 0.068518000 | -0.210207000 | 0.000039000 |
|---|-------------|--------------|-------------|

|   |              |              |              |
|---|--------------|--------------|--------------|
| C | -0.787441000 | 0.910523000  | -0.000021000 |
| C | -2.164609000 | 0.776627000  | -0.000049000 |
| C | -2.684558000 | -0.520881000 | -0.000026000 |
| C | -1.857398000 | -1.640842000 | 0.000025000  |
| C | -0.468857000 | -1.490492000 | 0.000054000  |
| C | 1.445974000  | 0.281821000  | 0.000066000  |
| C | 1.320060000  | 1.756092000  | 0.000218000  |
| H | -2.816587000 | 1.641506000  | -0.000092000 |
| H | -3.760688000 | -0.653411000 | -0.000048000 |
| H | -2.292286000 | -2.632763000 | 0.000041000  |
| H | 0.181654000  | -2.357399000 | 0.000092000  |
| H | 2.090568000  | 2.507234000  | -0.000512000 |
| N | -0.015870000 | 2.064134000  | -0.000045000 |
| C | 2.613008000  | -0.444064000 | -0.000027000 |
| N | 2.659445000  | -1.792021000 | -0.000101000 |
| H | -0.387674000 | 2.999046000  | -0.000108000 |
| H | 3.571807000  | 0.079538000  | -0.000020000 |

TS or TS'

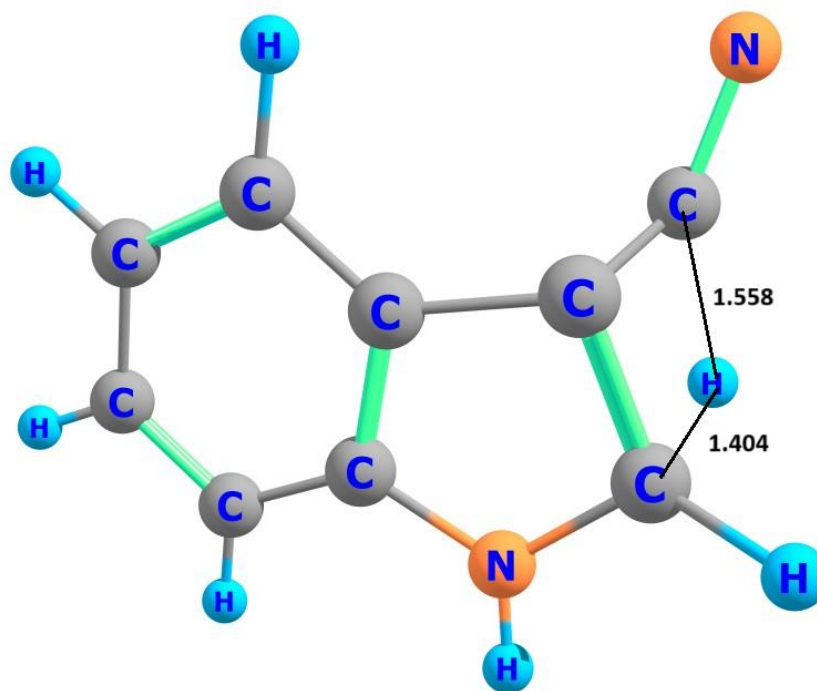

18

symmetry c1

|   |              |              |              |
|---|--------------|--------------|--------------|
| C | 0.043193000  | -0.338462000 | 0.317923000  |
| C | 0.692431000  | 0.876390000  | -0.007130000 |
| C | 2.045161000  | 0.934947000  | -0.297791000 |
| C | 2.763496000  | -0.259194000 | -0.240804000 |
| C | 2.138244000  | -1.467042000 | 0.070599000  |
| C | 0.770667000  | -1.520242000 | 0.340368000  |
| C | -1.367887000 | -0.036732000 | 0.458802000  |
| C | -1.511151000 | 1.443949000  | 0.299767000  |
| H | 2.524288000  | 1.868184000  | -0.567509000 |
| H | 3.826042000  | -0.247110000 | -0.452590000 |
| H | 2.724197000  | -2.377976000 | 0.099326000  |
| H | 0.285913000  | -2.460742000 | 0.573393000  |
| H | -2.143972000 | 2.070079000  | 0.926193000  |
| N | -0.241544000 | 1.905622000  | -0.004257000 |
| C | -2.430382000 | -0.520920000 | -0.450894000 |

|   |              |              |              |
|---|--------------|--------------|--------------|
| N | -3.146696000 | -1.534567000 | -0.362439000 |
| H | -0.019801000 | 2.867715000  | -0.212372000 |
| H | -2.341620000 | 1.006288000  | -0.744612000 |

S-4 or S4' (Radical)

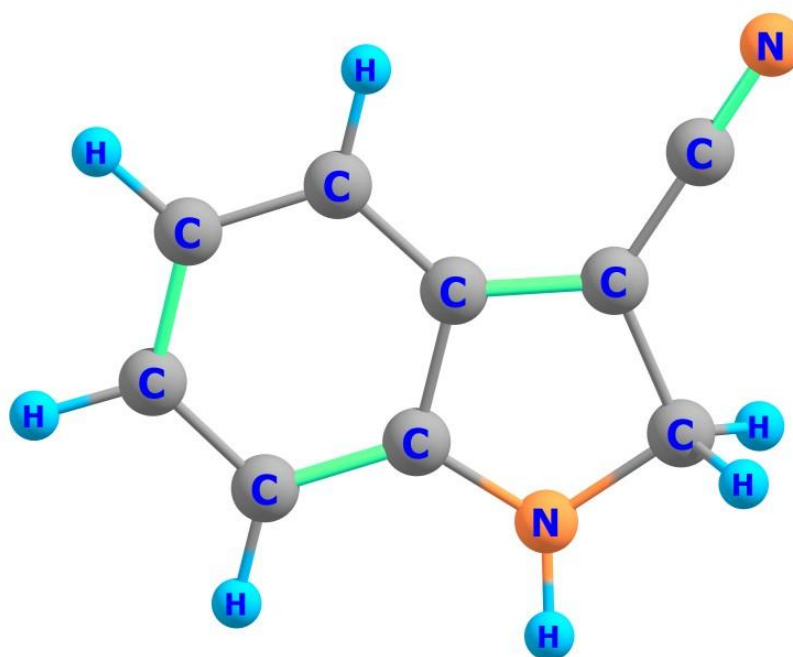

18

symmetry c1

|   |              |              |              |
|---|--------------|--------------|--------------|
| C | -0.009926000 | -0.289747000 | -0.009569000 |
| C | 0.797395000  | 0.884814000  | -0.018559000 |
| C | 2.189068000  | 0.795554000  | 0.001131000  |
| C | 2.758373000  | -0.470295000 | 0.013983000  |
| C | 1.973051000  | -1.637991000 | 0.006028000  |
| C | 0.594158000  | -1.559324000 | -0.005691000 |
| C | -1.356972000 | 0.127977000  | 0.004884000  |
| C | -1.405089000 | 1.632618000  | 0.031544000  |
| H | 2.804015000  | 1.687286000  | 0.002427000  |
| H | 3.838591000  | -0.561318000 | 0.028515000  |

|   |              |              |              |
|---|--------------|--------------|--------------|
| H | 2.459179000  | -2.606194000 | 0.013103000  |
| H | -0.017887000 | -2.454239000 | -0.004744000 |
| H | -1.984713000 | 2.046456000  | -0.801648000 |
| N | 0.000672000  | 1.987849000  | -0.068564000 |
| C | -2.482581000 | -0.695485000 | 0.000228000  |
| N | -3.418487000 | -1.382339000 | -0.003642000 |
| H | 0.328525000  | 2.910882000  | 0.160987000  |
| H | -1.847868000 | 2.009836000  | 0.962926000  |

S-5 or S5' (Cation)

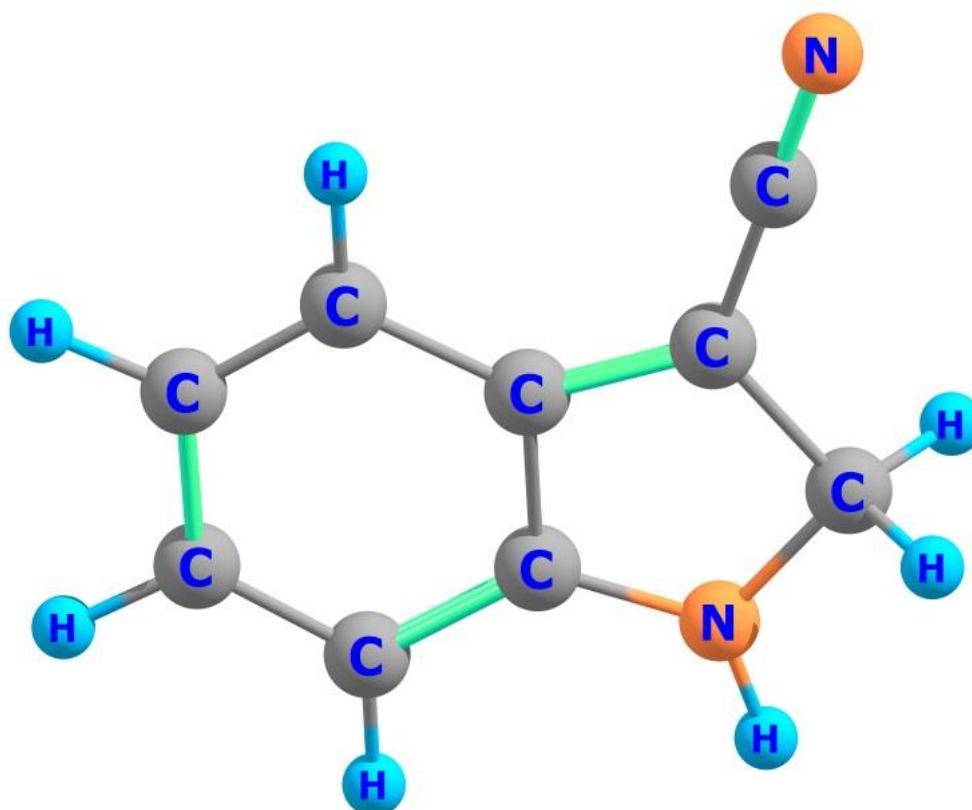

18

symmetry c1

|   |              |              |              |
|---|--------------|--------------|--------------|
| C | -0.037911000 | -0.291382000 | -0.000048000 |
| C | 0.809460000  | 0.893165000  | -0.000114000 |
| C | 2.221810000  | 0.776142000  | -0.000179000 |

|   |              |              |              |
|---|--------------|--------------|--------------|
| C | 2.725449000  | -0.486406000 | -0.000149000 |
| C | 1.900918000  | -1.673730000 | -0.000064000 |
| C | 0.551868000  | -1.597548000 | -0.000021000 |
| C | -1.325308000 | 0.148444000  | 0.000053000  |
| C | -1.348469000 | 1.635477000  | 0.000017000  |
| H | 2.854696000  | 1.652474000  | -0.000244000 |
| H | 3.800681000  | -0.620393000 | -0.000191000 |
| H | 2.393957000  | -2.637126000 | -0.000040000 |
| H | -0.077245000 | -2.478162000 | 0.000022000  |
| H | -1.848751000 | 2.040776000  | -0.886205000 |
| N | 0.053215000  | 1.969264000  | -0.000046000 |
| C | -2.492615000 | -0.657157000 | 0.000222000  |
| N | -3.438866000 | -1.312380000 | 0.000369000  |
| H | 0.393740000  | 2.921365000  | -0.000128000 |
| H | -1.848727000 | 2.040855000  | 0.886213000  |

S-6 or or S6'

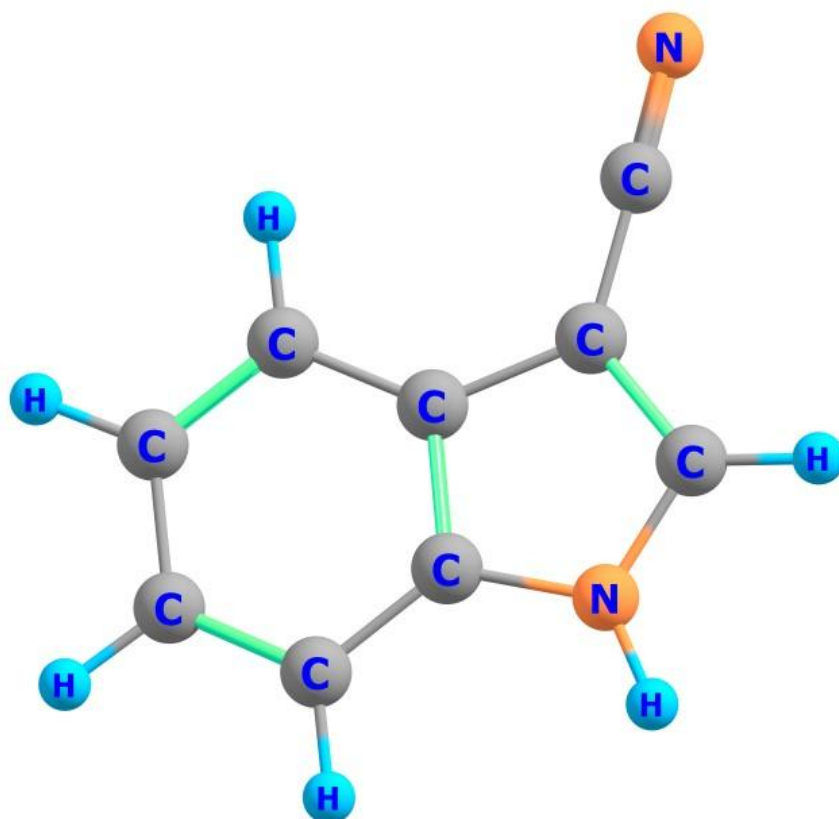

17

symmetry c1

|   |              |              |              |
|---|--------------|--------------|--------------|
| C | 0.022061000  | -0.276022000 | 0.000009000  |
| C | -0.790006000 | 0.874191000  | -0.000020000 |
| C | -2.183392000 | 0.799447000  | -0.000009000 |
| C | -2.748733000 | -0.462561000 | 0.000032000  |
| C | -1.951775000 | -1.622588000 | 0.000062000  |
| C | -0.571622000 | -1.543702000 | 0.000050000  |
| C | 1.384788000  | 0.196993000  | -0.000015000 |
| C | 1.337954000  | 1.573195000  | -0.000056000 |
| H | -2.795206000 | 1.693514000  | -0.000032000 |
| H | -3.828128000 | -0.560651000 | 0.000042000  |
| H | -2.432458000 | -2.594041000 | 0.000094000  |
| H | 0.038107000  | -2.440217000 | 0.000073000  |
| N | 0.044282000  | 1.974362000  | -0.000059000 |

|   |              |              |              |
|---|--------------|--------------|--------------|
| C | 2.555137000  | -0.592935000 | 0.000000000  |
| N | 3.498418000  | -1.259761000 | 0.000013000  |
| H | -0.254481000 | 2.936510000  | -0.000088000 |
| H | 2.146795000  | 2.286562000  | -0.000083000 |

S-1 (Anionic)

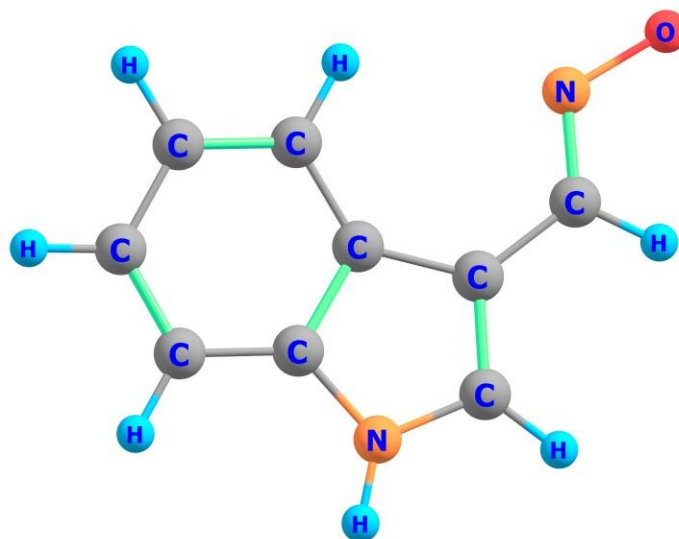

19

symmetry c1

|   |              |              |              |
|---|--------------|--------------|--------------|
| C | 0.313583000  | -0.085997000 | 0.000260000  |
| C | 1.466005000  | 0.744404000  | -0.000171000 |
| C | 2.763601000  | 0.222142000  | -0.000228000 |
| C | 2.900323000  | -1.159346000 | 0.000285000  |
| C | 1.769822000  | -2.003801000 | 0.000843000  |
| C | 0.482939000  | -1.480790000 | 0.000792000  |
| C | -0.844725000 | 0.789362000  | 0.000204000  |
| C | -0.352230000 | 2.076228000  | -0.000153000 |
| H | 3.629251000  | 0.871505000  | -0.000640000 |
| H | 3.890761000  | -1.595995000 | 0.000279000  |
| H | 1.912103000  | -3.076900000 | 0.001306000  |

|   |              |              |              |
|---|--------------|--------------|--------------|
| H | -0.384689000 | -2.124528000 | 0.001144000  |
| H | -0.888395000 | 3.009981000  | -0.000297000 |
| N | 1.032781000  | 2.056139000  | -0.000417000 |
| C | -2.259341000 | 0.449285000  | 0.000371000  |
| N | -2.698651000 | -0.772823000 | -0.000928000 |
| O | -4.072835000 | -0.939741000 | -0.000792000 |
| H | 1.621541000  | 2.867603000  | -0.000809000 |
| H | -2.976661000 | 1.274124000  | 0.001549000  |

S-1 (radical)

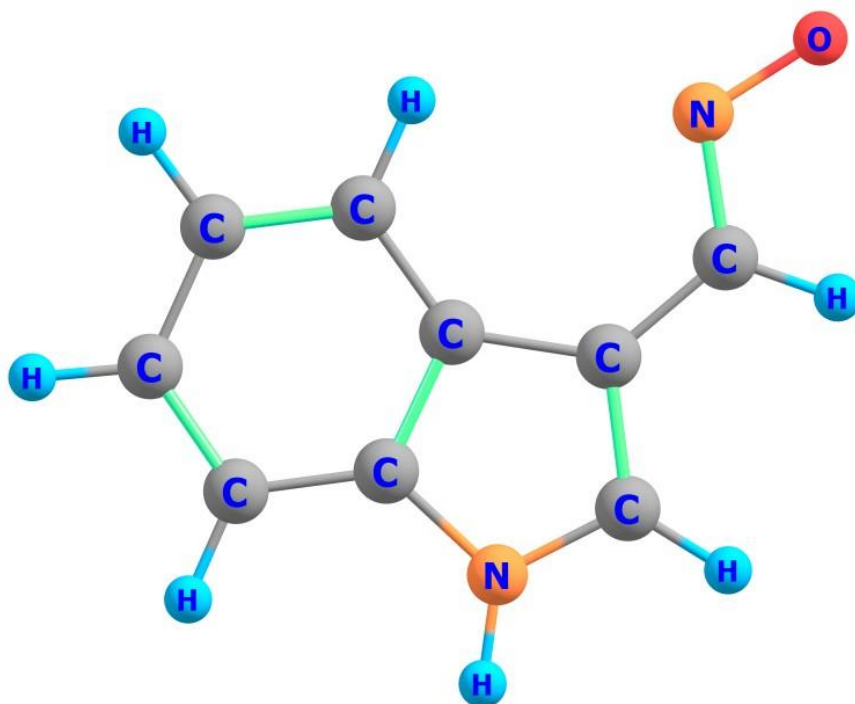

19

symmetry c1

|   |             |              |              |
|---|-------------|--------------|--------------|
| C | 0.313583000 | -0.085997000 | 0.000260000  |
| C | 1.466005000 | 0.744404000  | -0.000171000 |
| C | 2.763601000 | 0.222142000  | -0.000228000 |
| C | 2.900323000 | -1.159346000 | 0.000285000  |

|   |              |              |              |
|---|--------------|--------------|--------------|
| C | 1.769822000  | -2.003801000 | 0.000843000  |
| C | 0.482939000  | -1.480790000 | 0.000792000  |
| C | -0.844725000 | 0.789362000  | 0.000204000  |
| C | -0.352230000 | 2.076228000  | -0.000153000 |
| H | 3.629251000  | 0.871505000  | -0.000640000 |
| H | 3.890761000  | -1.595995000 | 0.000279000  |
| H | 1.912103000  | -3.076900000 | 0.001306000  |
| H | -0.384689000 | -2.124528000 | 0.001144000  |
| H | -0.888395000 | 3.009981000  | -0.000297000 |
| N | 1.032781000  | 2.056139000  | -0.000417000 |
| C | -2.259341000 | 0.449285000  | 0.000371000  |
| N | -2.698651000 | -0.772823000 | -0.000928000 |
| O | -4.072835000 | -0.939741000 | -0.000792000 |
| H | 1.621541000  | 2.867603000  | -0.000809000 |
| H | -2.976661000 | 1.274124000  | 0.001549000  |

10PPT

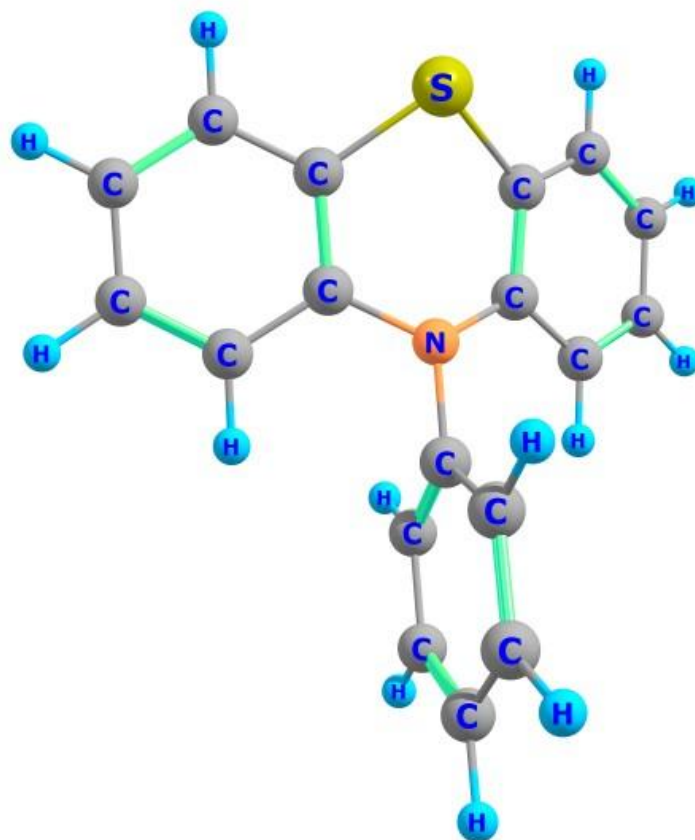

33

symmetry c1

|   |              |              |              |
|---|--------------|--------------|--------------|
| C | -0.404678000 | 3.552957000  | -0.744110000 |
| C | 0.267204000  | 2.355466000  | -0.528002000 |
| C | -0.414115000 | 1.226604000  | -0.063129000 |
| C | -1.788439000 | 1.344012000  | 0.188105000  |
| C | -2.462539000 | 2.532077000  | -0.068274000 |
| C | -1.772678000 | 3.647510000  | -0.527725000 |
| C | -1.788445000 | -1.344006000 | 0.188106000  |
| C | -0.414120000 | -1.226604000 | -0.063129000 |
| C | 0.267194000  | -2.355469000 | -0.528001000 |
| H | 1.331487000  | -2.306311000 | -0.713194000 |
| C | -0.404692000 | -3.552957000 | -0.744109000 |
| C | -1.772692000 | -3.647504000 | -0.527724000 |

|   |              |              |              |
|---|--------------|--------------|--------------|
| C | -2.462549000 | -2.532068000 | -0.068273000 |
| H | 0.153555000  | 4.413177000  | -1.095205000 |
| H | 1.331496000  | 2.306304000  | -0.713195000 |
| H | -3.529496000 | 2.585923000  | 0.117651000  |
| H | -2.299800000 | 4.576587000  | -0.707778000 |
| H | 0.153537000  | -4.413179000 | -1.095204000 |
| H | -2.299819000 | -4.576579000 | -0.707776000 |
| H | -3.529506000 | -2.585910000 | 0.117651000  |
| C | 3.800406000  | -0.000007000 | -0.960681000 |
| C | 4.460001000  | -0.000006000 | 0.265405000  |
| C | 3.728760000  | -0.000004000 | 1.447965000  |
| C | 2.337950000  | -0.000003000 | 1.407365000  |
| C | 1.682144000  | -0.000004000 | 0.182747000  |
| C | 2.412164000  | -0.000006000 | -1.003737000 |
| H | 4.367541000  | -0.000008000 | -1.884259000 |
| H | 5.543493000  | -0.000007000 | 0.297511000  |
| H | 4.239080000  | -0.000003000 | 2.404198000  |
| H | 1.752913000  | -0.000001000 | 2.319898000  |
| H | 1.888787000  | -0.000006000 | -1.953531000 |
| N | 0.247159000  | -0.000001000 | 0.172725000  |
| S | -2.653664000 | 0.000005000  | 0.955460000  |

10PPT\*

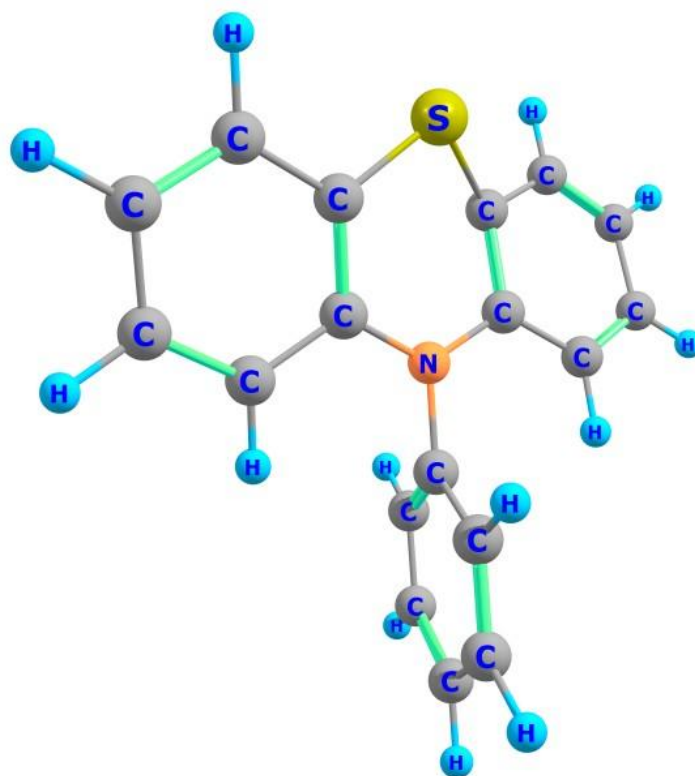

33

symmetry c1

|   |              |              |              |
|---|--------------|--------------|--------------|
| C | 0.462026000  | -3.629557000 | 0.265564000  |
| C | -0.211160000 | -2.417151000 | 0.326710000  |
| C | 0.432926000  | -1.220298000 | 0.019904000  |
| C | 1.877506000  | -1.230389000 | -0.302466000 |
| C | 2.520791000  | -2.526036000 | -0.440376000 |
| C | 1.843969000  | -3.663949000 | -0.169137000 |
| C | 1.755314000  | 1.410509000  | 0.111427000  |
| C | 0.376365000  | 1.235901000  | -0.128958000 |
| C | -0.397216000 | 2.390433000  | -0.378440000 |
| H | -1.452215000 | 2.286941000  | -0.592625000 |
| C | 0.165674000  | 3.647056000  | -0.345997000 |
| C | 1.526985000  | 3.812565000  | -0.066204000 |
| C | 2.307512000  | 2.697576000  | 0.153305000  |

|   |              |              |              |
|---|--------------|--------------|--------------|
| H | -0.052755000 | -4.550592000 | 0.505787000  |
| H | -1.266952000 | -2.409574000 | 0.569561000  |
| H | 3.556983000  | -2.558765000 | -0.762682000 |
| H | 2.334244000  | -4.623976000 | -0.292896000 |
| H | -0.458867000 | 4.510855000  | -0.540997000 |
| H | 1.969324000  | 4.800725000  | -0.039353000 |
| H | 3.369813000  | 2.803467000  | 0.345083000  |
| C | -3.784073000 | -0.437019000 | -1.100277000 |
| C | -4.441610000 | -0.148142000 | 0.091750000  |
| C | -3.712042000 | 0.187811000  | 1.227905000  |
| C | -2.323941000 | 0.236406000  | 1.175351000  |
| C | -1.678407000 | -0.051817000 | -0.020016000 |
| C | -2.396370000 | -0.390867000 | -1.159204000 |
| H | -4.351312000 | -0.696903000 | -1.986278000 |
| H | -5.523956000 | -0.184876000 | 0.135195000  |
| H | -4.222729000 | 0.410253000  | 2.157434000  |
| H | -1.739989000 | 0.496897000  | 2.050599000  |
| H | -1.866845000 | -0.614333000 | -2.078097000 |
| N | -0.241148000 | -0.013223000 | -0.078502000 |
| S | 2.840487000  | 0.062765000  | 0.344608000  |

10PPT\*\*

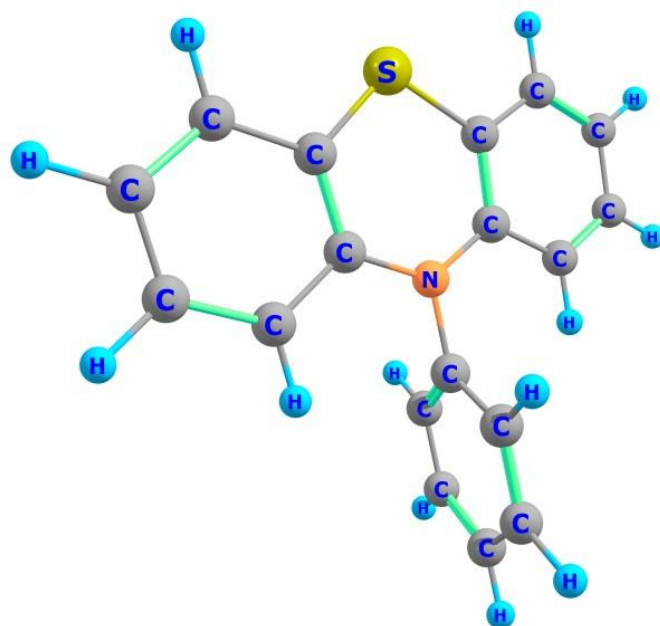

33

symmetry c1

|   |              |              |              |
|---|--------------|--------------|--------------|
| C | 0.259158000  | 3.647120000  | -0.000190000 |
| C | -0.352049000 | 2.417695000  | -0.000077000 |
| C | 0.413616000  | 1.231562000  | -0.000099000 |
| C | 1.820254000  | 1.352456000  | -0.000226000 |
| C | 2.426364000  | 2.618439000  | -0.000348000 |
| C | 1.657290000  | 3.756192000  | -0.000332000 |
| C | 1.820299000  | -1.352402000 | -0.000059000 |
| C | 0.413659000  | -1.231556000 | 0.000051000  |
| C | -0.351962000 | -2.417715000 | 0.000177000  |
| H | -1.430194000 | -2.359468000 | 0.000254000  |
| C | 0.259290000  | -3.647119000 | 0.000201000  |
| C | 1.657426000  | -3.756141000 | 0.000092000  |
| C | 2.426457000  | -2.618359000 | -0.000041000 |
| H | -0.352828000 | 4.540281000  | -0.000170000 |
| H | -1.430279000 | 2.359409000  | 0.000031000  |
| H | 3.507872000  | 2.685123000  | -0.000457000 |

|   |              |              |              |
|---|--------------|--------------|--------------|
| H | 2.130292000  | 4.729773000  | -0.000427000 |
| H | -0.352665000 | -4.540301000 | 0.000301000  |
| H | 2.130463000  | -4.729706000 | 0.000109000  |
| H | 3.507969000  | -2.685001000 | -0.000129000 |
| C | -3.734128000 | -0.000037000 | 1.206920000  |
| C | -4.426425000 | -0.000057000 | 0.000321000  |
| C | -3.734301000 | -0.000065000 | -1.206377000 |
| C | -2.344952000 | -0.000054000 | -1.212840000 |
| C | -1.672175000 | -0.000033000 | 0.000122000  |
| C | -2.344778000 | -0.000022000 | 1.213185000  |
| H | -4.273883000 | -0.000034000 | 2.146044000  |
| H | -5.509962000 | -0.000068000 | 0.000400000  |
| H | -4.274191000 | -0.000079000 | -2.145423000 |
| H | -1.787594000 | -0.000059000 | -2.142042000 |
| H | -1.787288000 | -0.000002000 | 2.142307000  |
| N | -0.223409000 | -0.000007000 | 0.000015000  |
| S | 2.895493000  | 0.000048000  | -0.000236000 |

BrCCl<sub>3</sub>

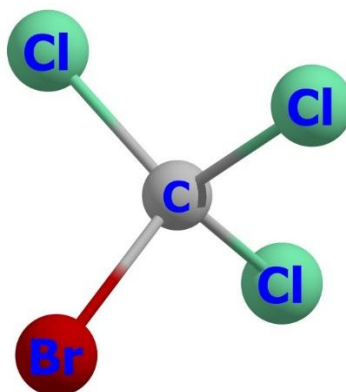

symmetry c1

|    |              |              |              |
|----|--------------|--------------|--------------|
| C  | -0.412239000 | 0.000076000  | -0.000068000 |
| Cl | -1.005911000 | -0.233178000 | 1.659894000  |
| Cl | -1.005288000 | -1.321103000 | -1.032070000 |
| Cl | -1.005314000 | 1.554301000  | -0.628206000 |
| Br | 1.535833000  | -0.000023000 | 0.000197000  |

## 20. References

- (1) Gaussian 16, Revision B.01, M. J. Frisch, G. W. Trucks, H. B. Schlegel, G. E. Scuseria, M. A. Robb, J. R. Cheeseman, G. Scalmani, V. Barone, G. A. Petersson, H. Nakatsuji, X. Li, M. Caricato, A.V. Marenich, J. Bloino, B. G. Janesko, R. Gomperts, B. Mennucci, H. P. Hratchian, J. V. Ortiz, A. F. Izmaylov, J. L. Sonnenberg, D. Williams-Young, F. Ding, F. Lipparini, F. Egidi, J. Goings, B. Peng, A. Petrone, T. Henderson, D. Ranasinghe, V. G. Zakrzewski, J. Gao, N. Rega, G. Zheng, W. Liang, M. Hada, M. Ehara, K. Toyota, R. Fukuda, J. Hasegawa, M. Ishida, T. Nakajima, Y. Honda, O. Kitao, H. Nakai, T. Vreven, K. Throssell, J. A. Montgomery, J. E. Peralta, F. Ogliaro, M. J. Bearpark, J. J. Heyd, E. N. Brothers, K. N. Kudin, V. N. Staroverov, T. A. Keith, R. Kobayashi, J. Normand, K. Raghavachari, A. P. Rendell, J. C. Burant, S. S. Iyengar, J. Tomasi, M. Cossi, J. M. Millam, M. Klene, C. Adamo, R. Cammi, J. W. Ochterski, R. L. Martin, K. Morokuma, O. Farkas, J. B. Foresman, D. J. Fox, Gaussian, Inc., Wallingford CT (2016) GaussView 5.0. Wallingford, E.U.A. - References - Scientific Research Publishing.
- (2) J. D. Chai and M. H. Gordon, " Long-Range Corrected Hybrid Density Functionals with Damped Atom–Atom Dispersion Corrections. " *Phys. Chem. Chem. Phys.* **2008**, 10 (44), 6615–6620.
- (3) A. D. McLean and G. S. Chandler, "Contracted Gaussian Basis Sets for Molecular Calculations. I. Second Row Atoms, Z =11–18." *The J. Chem. Phys.* 1980, 72 (10), 5639–5648.
- (4) N. Iranpoor, F. Panahi, S. Erfan and F. Roozbin, " Selective and Efficient Formylation of Indoles (C3) and Pyrroles (C2) Using 2,4,6-Trichloro-1,3,5-Triazine/Dimethylformamide (TCT/DMF) Mixed Reagent." *J. Heterocyclic Chem.*, 54, 904 (2017).
- (5) H. Huang, " Synthesis of 2-Phenyl-4,6-Bis(Trifluoromethyl)Pyridine via NH<sub>4</sub>I/Na<sub>2</sub>S<sub>2</sub>O<sub>4</sub>-Mediated Cyclization of Ketoxime Acetates." *Org. Synth.* **2023**, 100, 248–270.
- (6) J. Chen, P.Z. Wang, B. Lu, D. Liang, X.Y. Yu, W. J. Xiao and J. R. Chen, " Enantioselective Radical Ring-Opening Cyanation of Oxime Esters by Dual Photoredox and Copper Catalysis." *Org. Lett.* 2019, 21, 23, 9763–9768.
- (7) L. Yi, C. Zhu, X. Chen, H. Yue, T. Ji, Y. Ma, Y. Cao, R. Kancharla and M. Rueping, " O–H Bond Activation of  $\beta,\gamma$ -Unsaturated Oximes via Hydrogen Atom Transfer (HAT) and Photoredox Dual Catalysis." *Chem. Sci.* **2023**, 14 (48), 14271–14279.
- (8) K. V. Aken, L. Streckowski, and L. Patiny, " EcoScale, a semi-quantitative tool to select an organic preparation based on economical and ecological parameters. " *Beilstein J. Org. Chem.*, **2** (1), 3.
- (9) N. Uludag, " An Efficient Synthesis of Nitriles from Aldoximes in the Presence of Trifluoromethanesulfonic Anhydride in Mild Conditions." *Russ. J. Org. Chem.*, 2020, Vol. 56, No. 9, pp. 1640–1645.
- (10) Z. Li, K. Sun and C. Cai, "Copper-catalyzed cyanation of heterocycle C–H bonds with ethyl(ethoxymethylene)cianoacetate as a cyanating agent and its mechanism." *Org. Chem. Front.* **2018**, 5 (11), 1848–1853.
- (11) S. Thunga, S. Poshala and Dr. H. P. Kokatla, " Methyl 2-Nitrosobenzoate: A Simple Dehydrating Agent for the Synthesis of Nitriles from Aldoximes " *ChemistrySelect* 2018, 3, 4425 – 4429

- (12) D. Patil and D. Dalal, "SOCl<sub>2</sub>/β-Cyclodextrin: A New and Efficient Catalytic System for Beckmann Rearrangement and Dehydration of Aldoximes Under Aqueous Condition." *Synth. Commun.* 2013, 43 (1), 118–128.
- (13) R. A. Sheldon, "Metrics of Green Chemistry and Sustainability: Past, Present, and Future" *ACS Sustainable Chem. Eng.* 2018, 6, 1, 32–48.
- (14) L. Pitzer, F. Schafers and F. Glorius, "Rapid Assessment of the Reaction-Condition-Based Sensitivity of Chemical Transformations" *Angew. Chem. Int. Ed.* 2019, 58, 8572–8576.
- (15) CCDC for compound **3a** under 2456403 contains the supplementary crystallographic data for this article. These data can be obtained free of charge from The Cambridge Crystallographic Data Centre via [https://www.ccdc.cam.ac.uk/data\\_request/cif](https://www.ccdc.cam.ac.uk/data_request/cif).
- (16) L. Zhang, Q. Wen, J. Jin, C. Wang, P. Lu and Y. Wang, "Cyanation of Indoles with Benzyl Cyanide as the Cyanide Anion Surrogate." *Tetrahedron* 2013, 69 (21), 4236–4240.
- (17) X. Wang, M. Makha, S. W. Chen, H. Zheng and Y. Li, "GaCl<sub>3</sub>-Catalyzed C–H Cyanation of Indoles with N-Cyanosuccinimide." *J. Org. Chem.* 2019, 84 (10), 6199–6206.
- (18) B. Liu, M. Liu, Q. Li, Y. Li, K. Feng and Y. Zhou, "The Palladium-Catalyzed Direct C3-Cyanation of Indoles Using Acetonitrile as the Cyanide Source." *Org. Biomol. Chem.* **2020**, 18 (31), 6108–6114.
- (19) M. Chakrabarty, S. Sarkar, S. Khasnobis, Y. Harigaya, N. Sato and S. Arima, " *Synth. Commun.* 2002, 32 (15), 2295–2306.
- (20) A. Divedi, Dr. S. Verma, Dr. D. Chandra, S. Bhargav, V. P. Verma and Dr. J. L. Jat, "Metal-Free Direct Synthesis of Secondary Amides and Nitriles Using O-(2-Pyrimidinyl)-N-Boc Hydroxylamine", *Eur. J. Org. Chem.* 2025, 28, e202401229 (1 of 5)
- (21) Dr. J. Kim, H. J. Kim and Prof. S. Chang, "Synthesis of Aromatic Nitriles Using Nonmetallic Cyano-Group Sources", *Angew. Chem. Int. Ed.* 2012, 51, 11948 – 11959.
- (22) J. Zanon, A. Klapars and S. L. Buchwald, "Copper-Catalyzed Domino Halide Exchange-Cyanation of Aryl Bromides." *J. Am. Chem. Soc.* **2003**, 125 (10), 2890–2891.
